# Supplementary material for: A catalog of bacterial reference genomes from cultivated human oral bacteria
Source: PubMed Central journal article supplement (PMC10318035; doi:10.1038/s41522-023-00414-3), 2023-07-03
Supplement: 41522_2023_414_MOESM1_ESM.pdf [file 41522_2023_414_MOESM1_ESM.pdf]

# Supplementary Figures:

## A collection of bacterial genomes from cultivated human

### oral bacteria

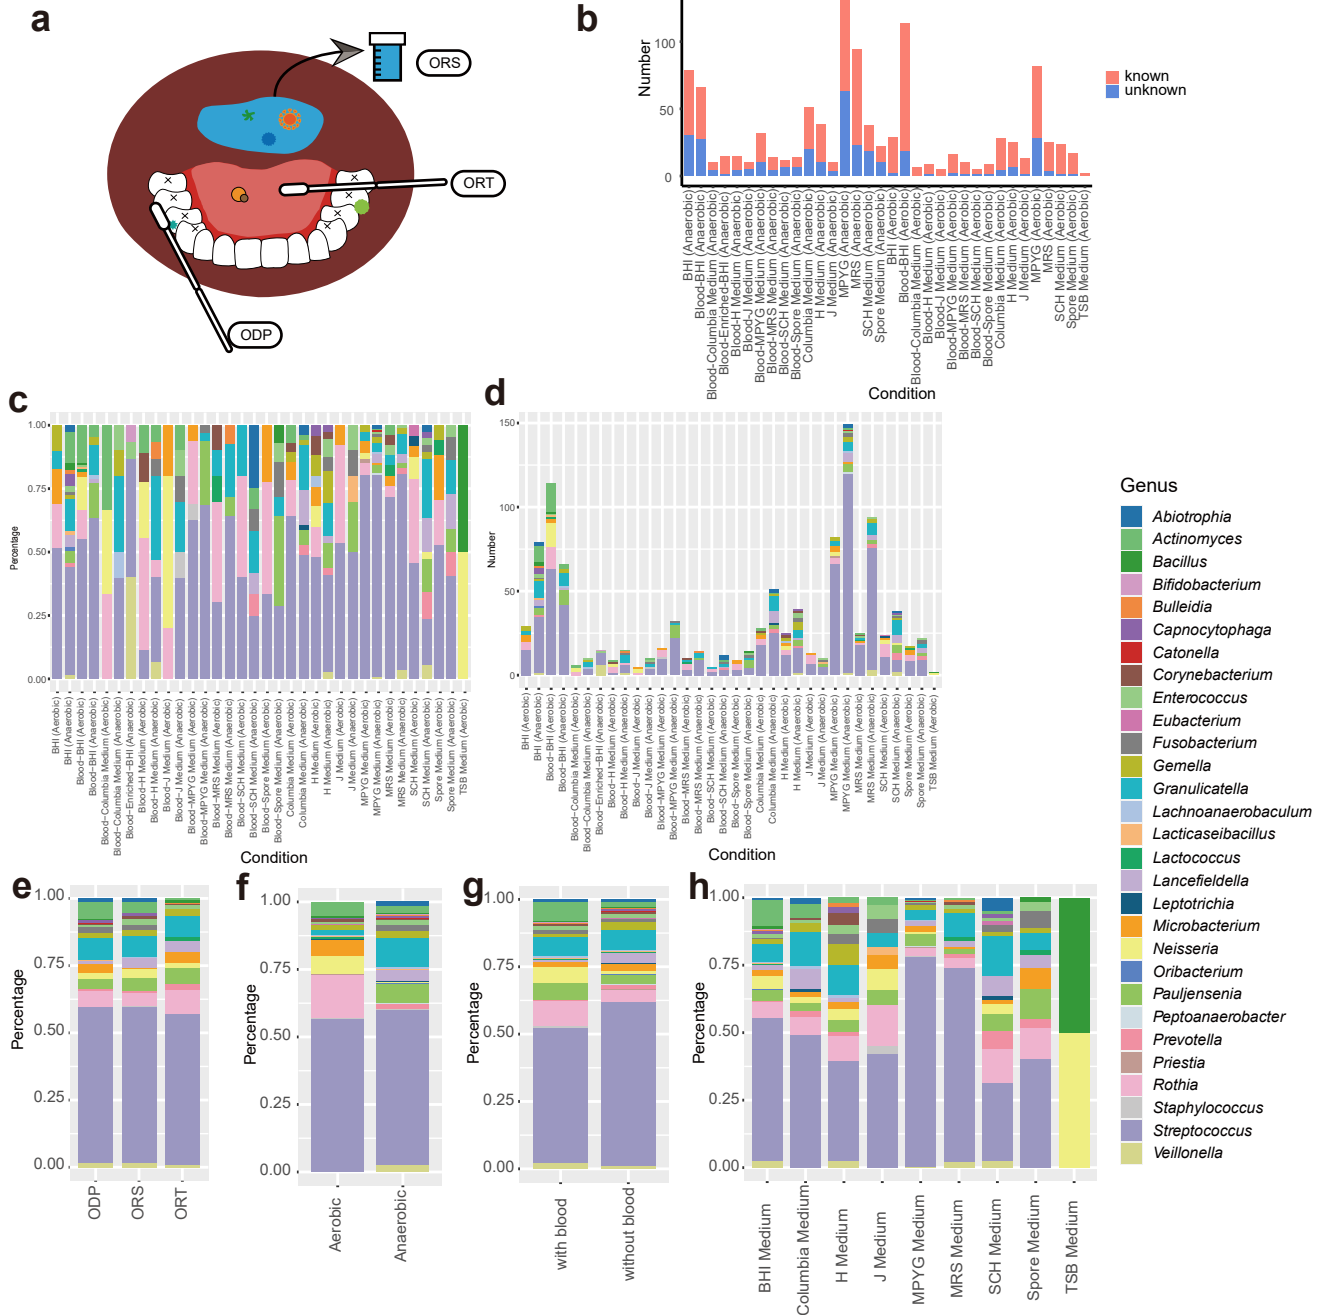

**Supplementary Fig. 1 | Cultured diversity of the oral microbiota.** **a**, Microbiota samples were collected from three different oral location of each volunteer, namely, saliva (ORS), oral dental plaque (ODP), tongue (ORT). **b**, Number of known and unknown strains cultured from 34 culture conditions. Left half represent anaerobic conditions. **c & d**, percentage (**c**) and number (**d**) of each genus using the 34 conditions.

Percentage of oral strains of each genus was also calculated by samplings (e), aerobic or anaerobic conditions (f), conditions with or without blood (g) and different media (h).

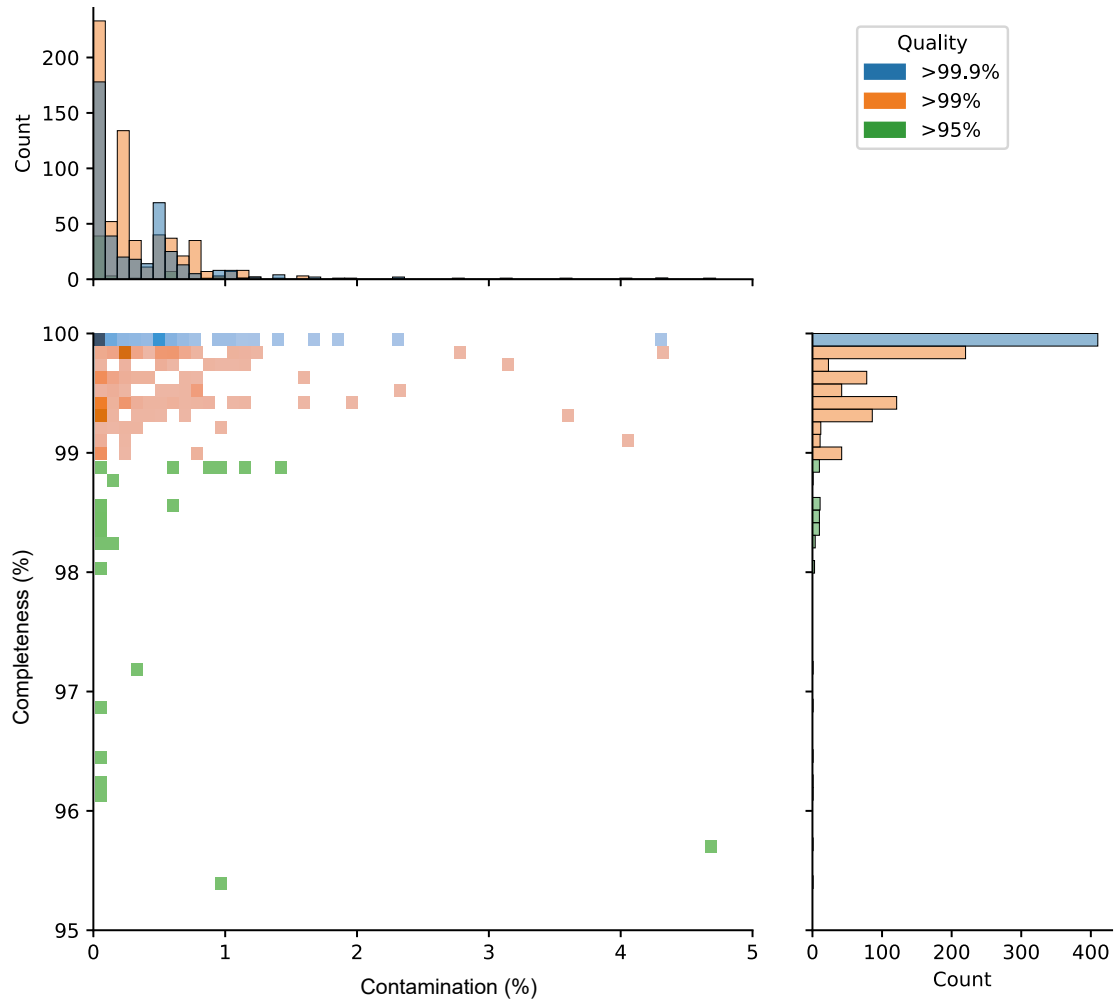

**Supplementary Fig. 2 | Assessment of 1,089 COGR genomes using CheckM.** The colors mark the different levels of completeness, and were deepened by the count of genomes. The height of marginal distribution denotes the counts of different completeness or contamination level.

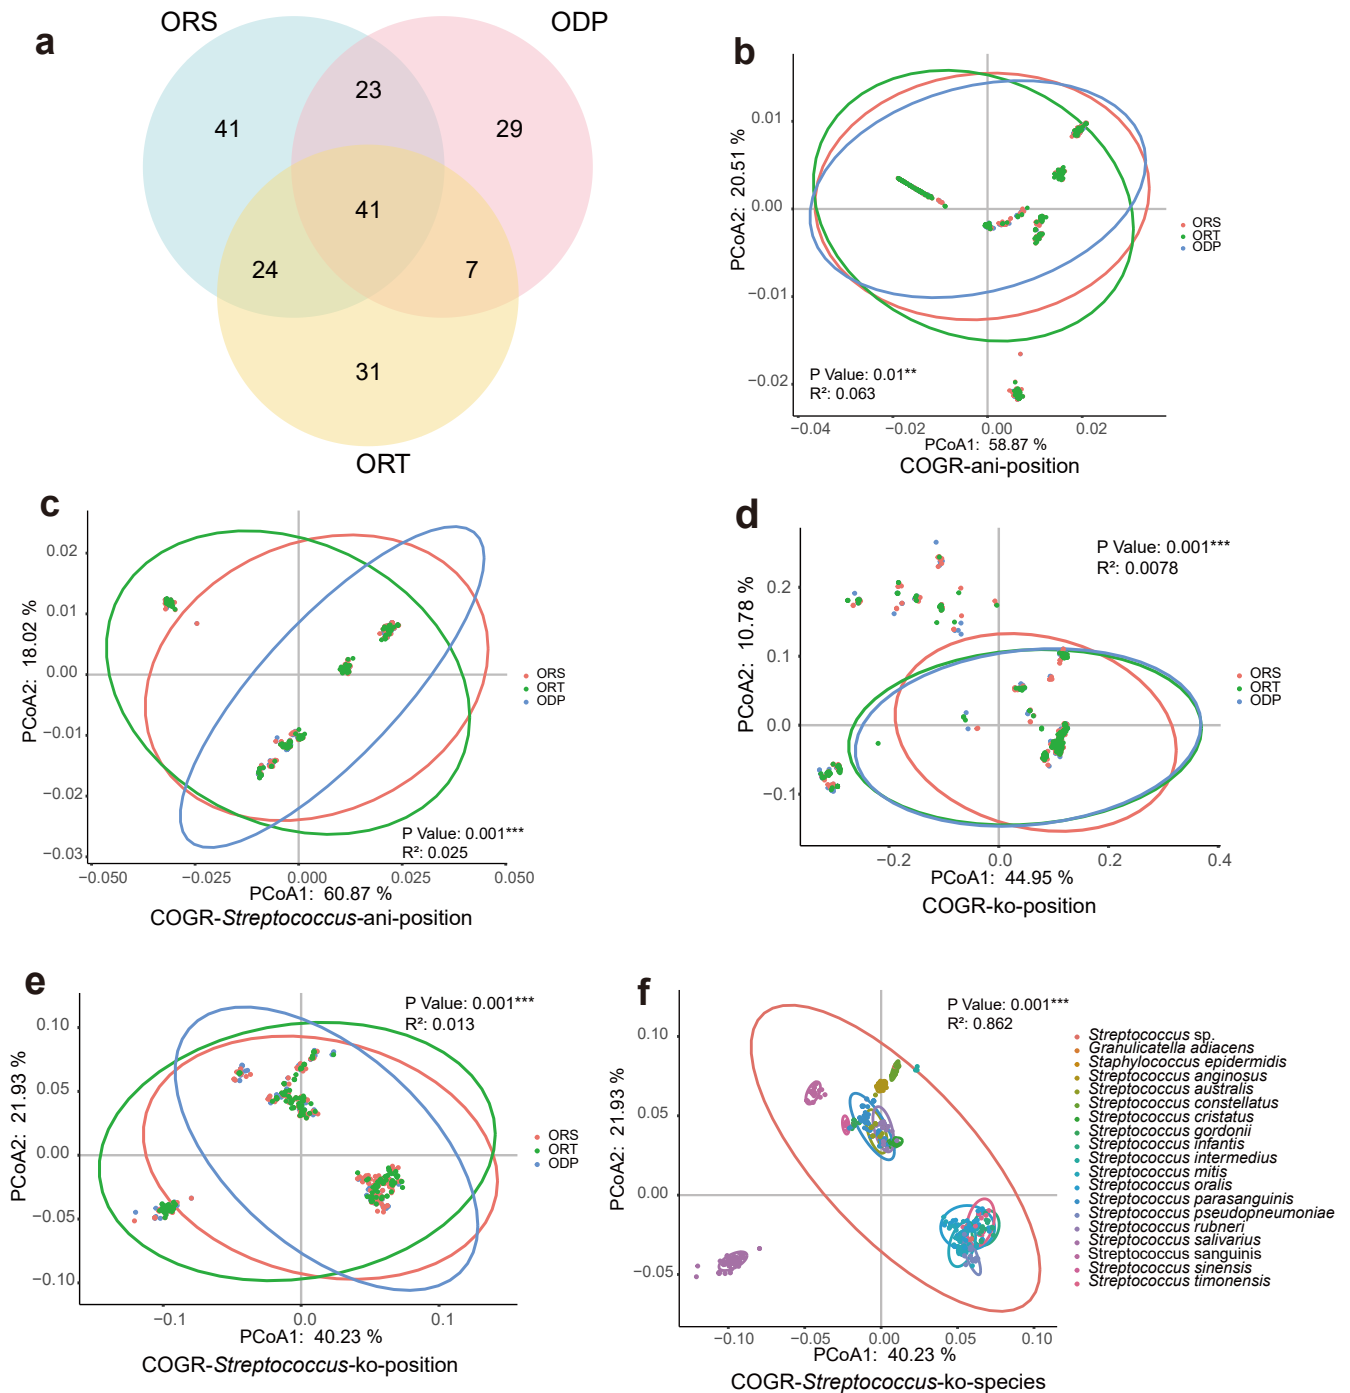

**Supplementary Fig. 3 | Differences between microbial communities of the three oral locations.** **a**, Venn diagram of clusters isolated from three different samplings. **b-f**, Principal Coordinates Analysis (PCoA) of taxonomic (**b**, **c**) and functional (**d**, **e**) profiles among microbial communities from different sites using Bray-Curtis dissimilarity calculated based on ANI and KO numbers annotated by KEGG. **b** & **d** present PCoA among all genomes in COGR while **c** & **e** present PCoA among genomes of *Streptococcus*. P-value and R<sup>2</sup> were calculated based on adonis test and are presented in each plot. Although the p-value showed significant differences between microbial

communities of three oral positions, the  $R^2$  were so low that we could not make a definite conclusion. PCoA among genomes of different species (f) showed that significant and reliable differences exist, indicating that the results above may be caused by the distinct difference between the taxonomy of different species. All genomes of novel strains are grouped together (*Streptococcus* sp.).

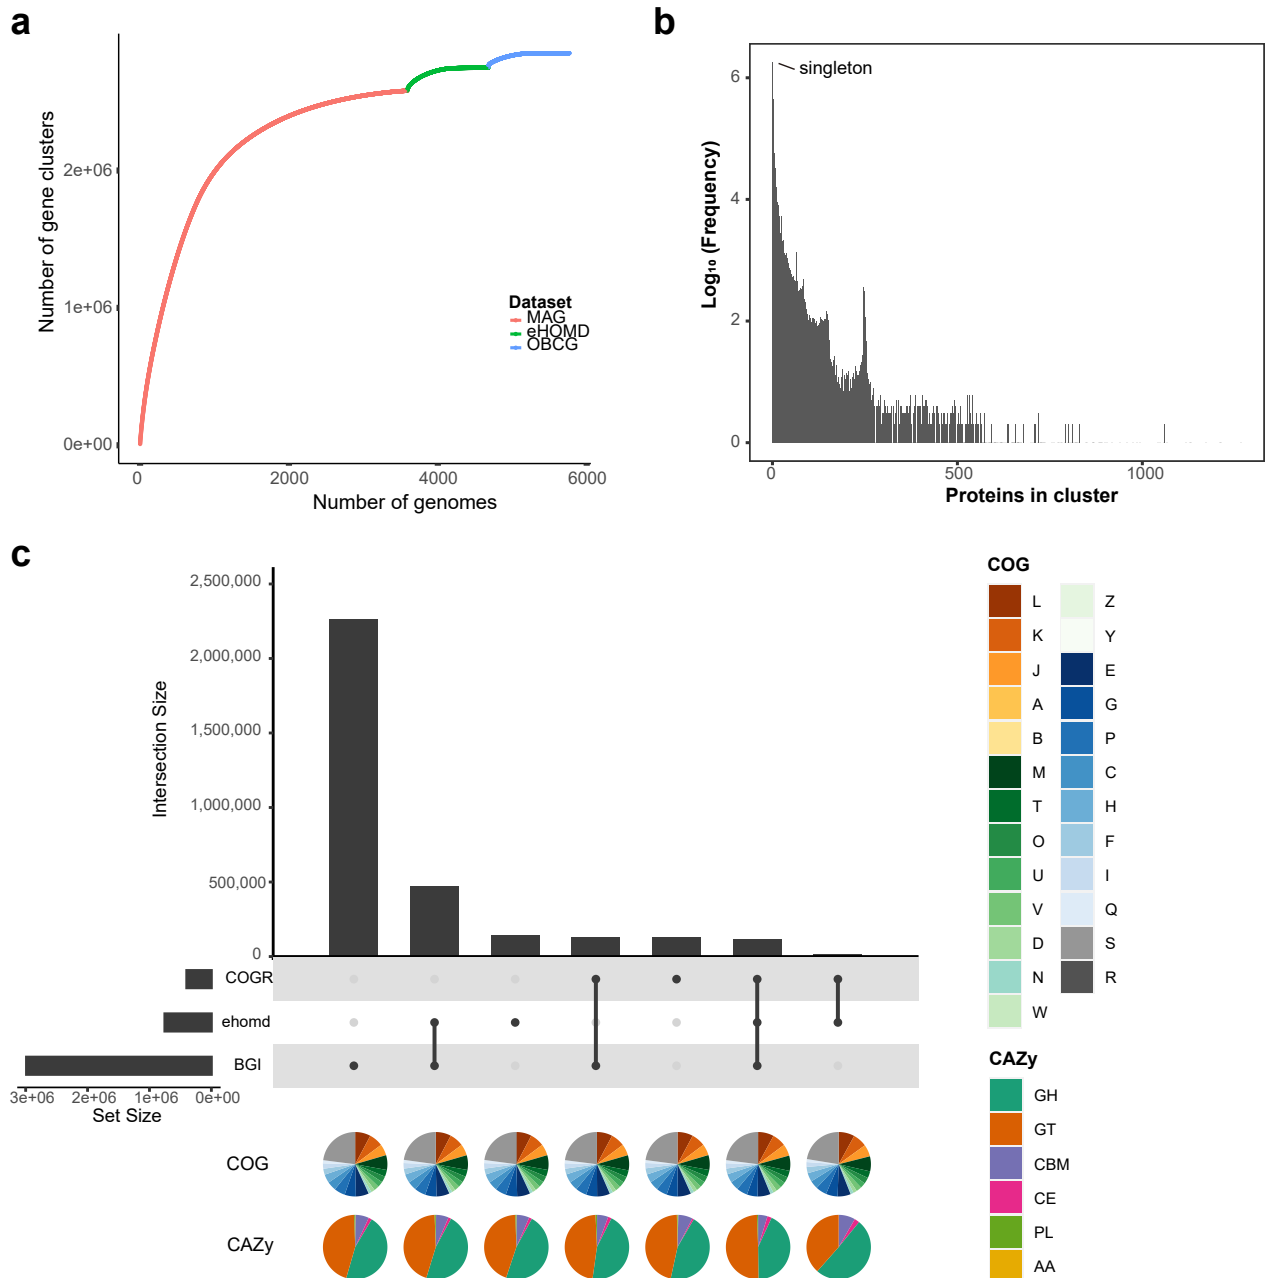

**Supplementary Fig. 4 | Non-redundant protein sequences from MAGs, eHOMD and COGR.** **a**, Gene accumulation curve of MAGs, eHOMD, and COGR. Genomes are sorted according to gene increase rate. **b**, Numbers of protein sequences contained in each protein cluster, most protein clusters contained only one sequence, termed singleton. **c**, Contribution of the three datasets to non-redundant protein sequences. Pie charts depict annotation categories in COG and CAZymers databases.



**a**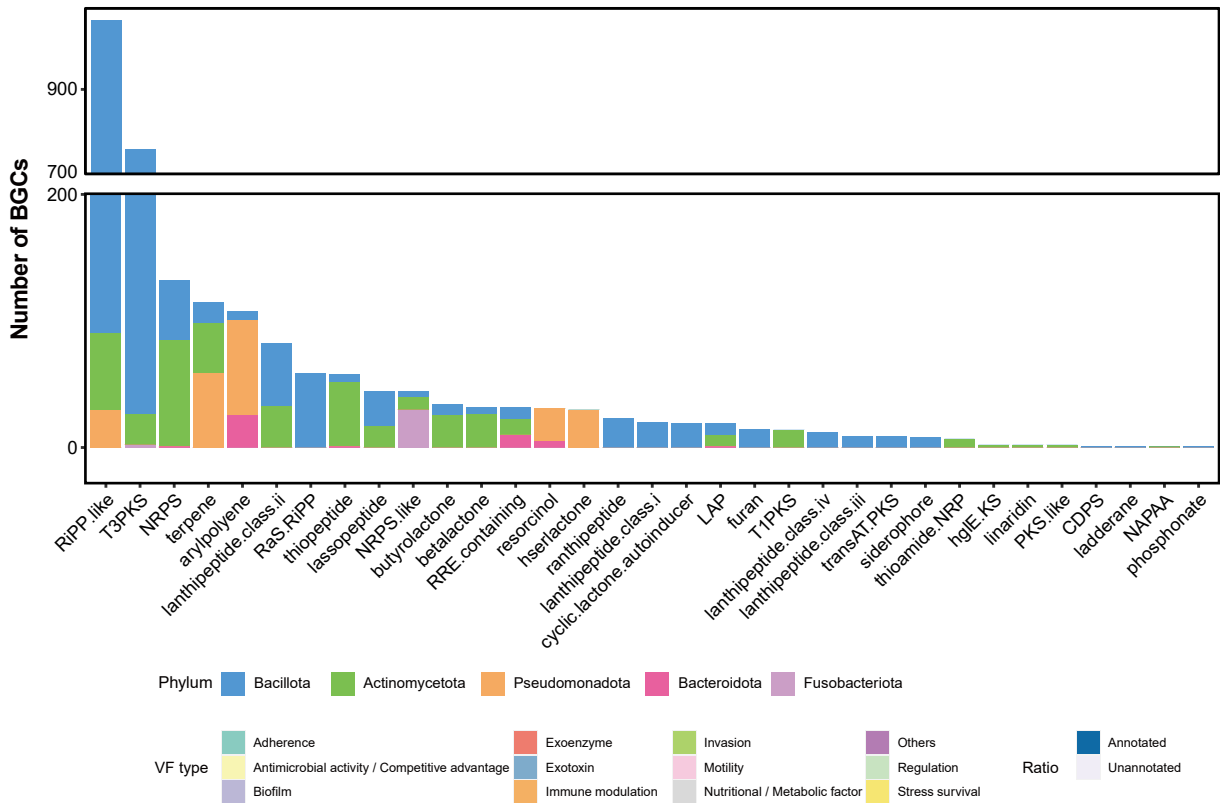**b**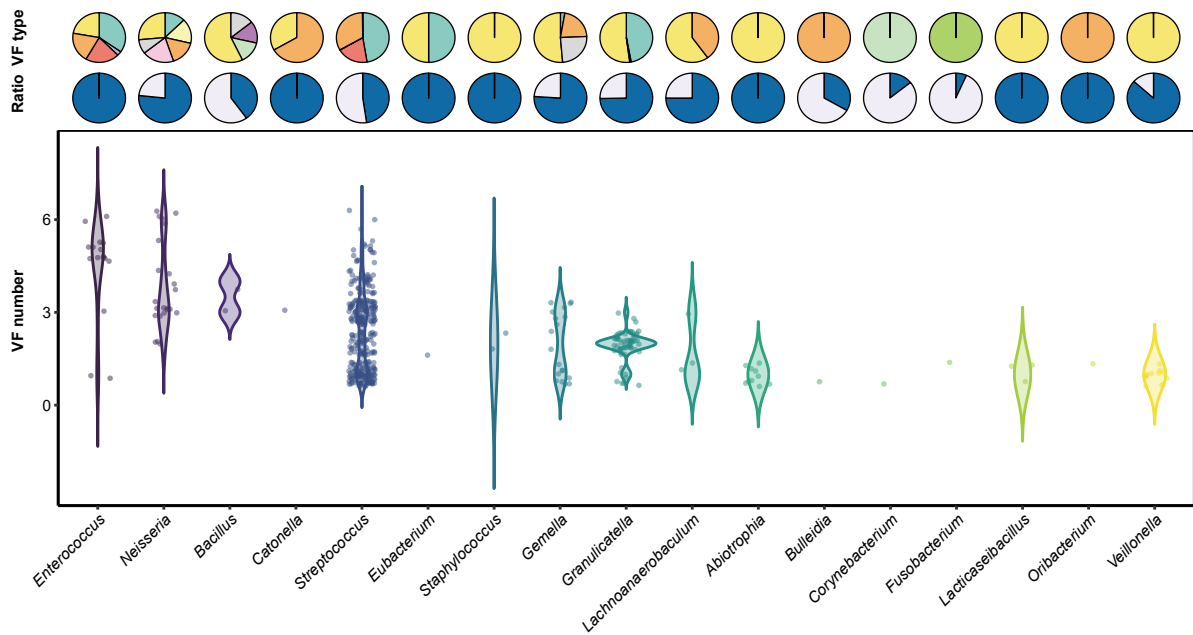

**Supplementary Fig. 6 | Annotation of BGCs and VFs in the COGR genomes. a,**

The distribution of BGCs in different phyla. **b,** The distribution of VFs at the genus level. The Y-axis represents the number of VFs, and the pie chart represents the categories of VFs and the annotation rate at the genus level.

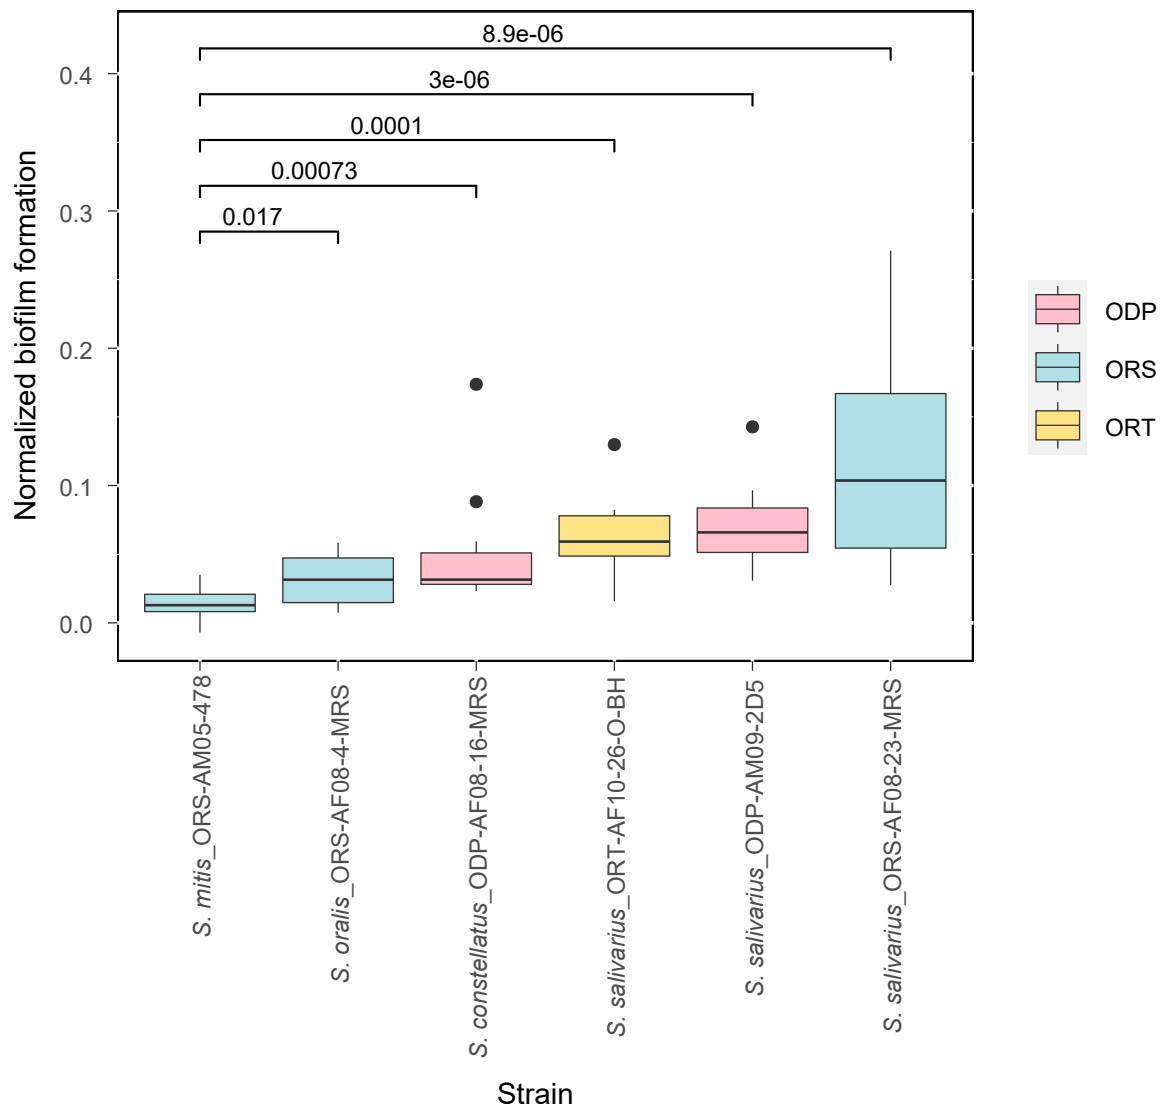

**Supplementary Fig. 7 | Crystal violet assay for determining biofilm formation of selected strains.** The boxplot of OD values of selected strains was colored by their species. *S. mitis*\_ORS-AM05-478, which does not harbor intact quorum sensing pathways was used as a reference. The p-values presented in the figure were calculated using the wilcoxon test (two-sided), 12 replicates for each strain.



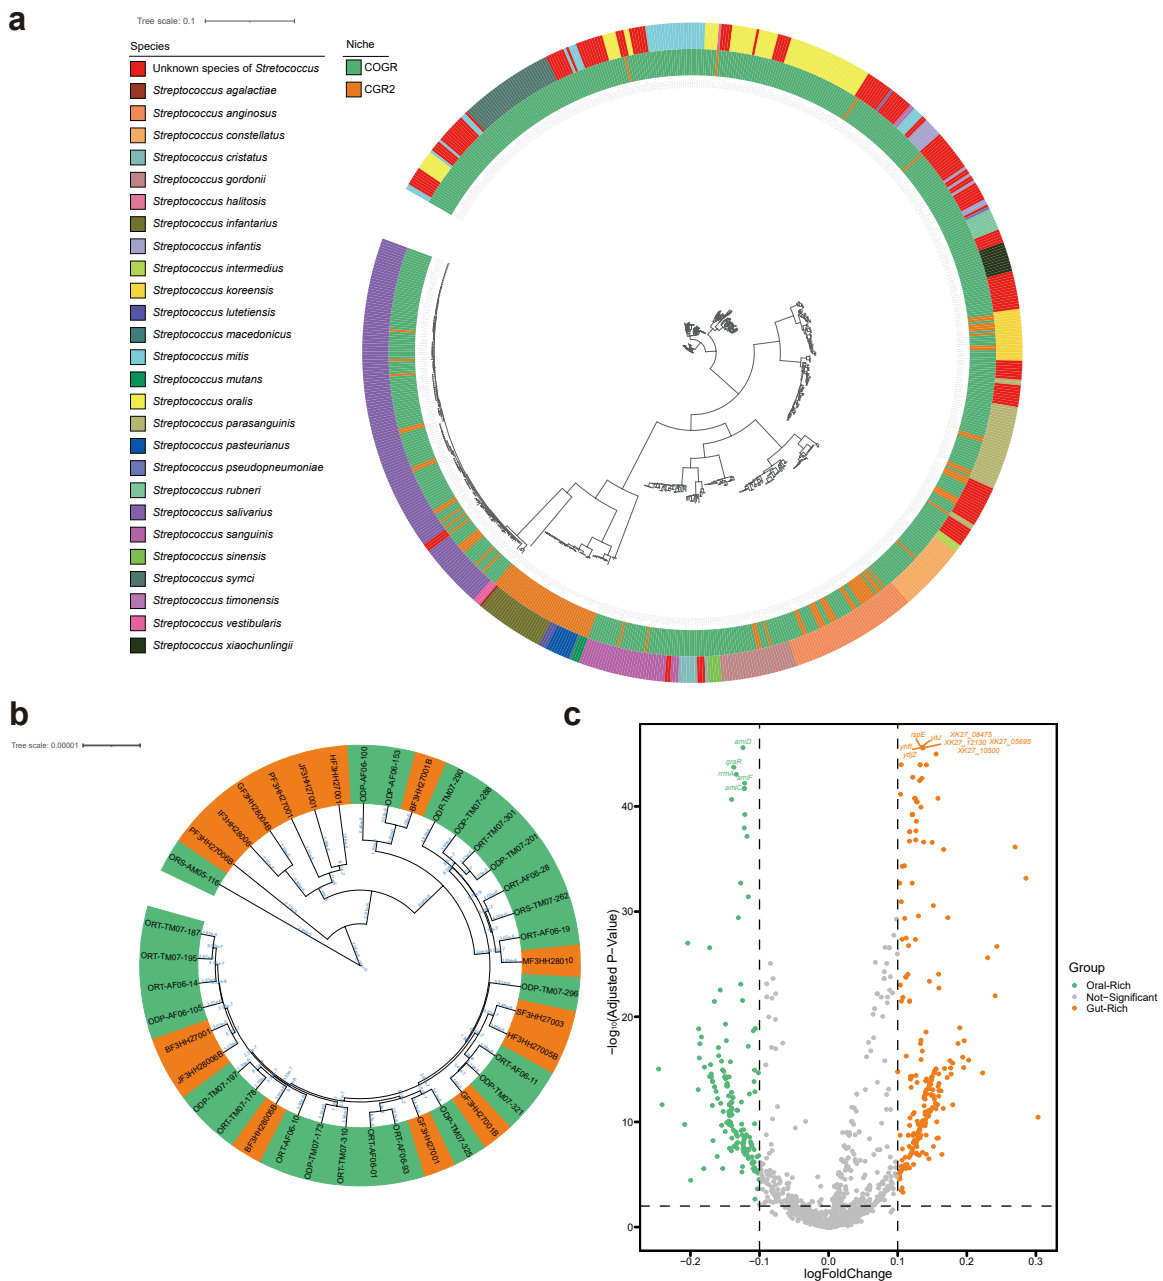

**Supplementary Fig. 8 | Comparison between COGR and CGR2. a,** Phylogenetic tree of genomes assigned to *Streptococcus* in COGR and CGR2. The inner circle is colored according to the oral location for sampling, and the outer circle is colored by assigned species **b,** Phylogenetic tree of genomes of *Microbacterium algeriense*. The circle is colored according to the origin of the bacterial isolates, and the Jaccard distance of genomes is shown on the branches. **c,** Differential proteins coded by *Streptococcus* in COGR and CGR2, and top 5  $-\log_{10}$  (Adjusted p-value) proteins are marked.

Supplementary Table 1. Information of cultivated strains and statistics for sequencing data of 1,089 high-quality genomes

| Genome ID    | Strain ID    | Position         | Gender | Age      | Medium                | Completeness | Contamination |
|--------------|--------------|------------------|--------|----------|-----------------------|--------------|---------------|
| BF3KA08004A  | ORS-AF03-140 | Oral- saliva     | Female | Adult    | BHI (Anaerobic)       | 99.25        | 0.96          |
| BF3KA09001A  | ORS-AF04-126 | Oral- saliva     | Female | Adult    | BHI (Anaerobic)       | 100          | 0             |
| BF3KA09002A  | ORS-AF04-178 | Oral- saliva     | Female | Adult    | BHI (Anaerobic)       | 100          | 0             |
| BF3KA09004   | ORS-AF04-35  | Oral- saliva     | Female | Adult    | BHI (Aerobic)         | 100          | 0             |
| BF3KA09004A  | ORS-AF04-180 | Oral- saliva     | Female | Adult    | BHI (Anaerobic)       | 100          | 0             |
| BF3KA09005   | ORS-AF04-36  | Oral- saliva     | Female | Adult    | BHI (Aerobic)         | 99.83        | 0.58          |
| BF3KA09008A  | ORS-AF04-232 | Oral- saliva     | Female | Adult    | BHI (Anaerobic)       | 99.66        | 0.34          |
| BF3KA09009A  | ORS-AF04-233 | Oral- saliva     | Female | Adult    | BHI (Anaerobic)       | 100          | 0.07          |
| BF3KA09011A  | ORS-AF04-252 | Oral- saliva     | Female | Adult    | BHI (Anaerobic)       | 99.62        | 0.07          |
| BF3KA10007A  | ORS-AF05-07  | Oral- saliva     | Female | Adult    | BHI (Anaerobic)       | 99.77        | 1.1           |
| BF3KA10010A  | ORS-AF05-10  | Oral- saliva     | Female | Adult    | BHI (Anaerobic)       | 99.83        | 0.58          |
| BF3KA10011A  | ORS-AF05-11  | Oral- saliva     | Female | Adult    | BHI (Anaerobic)       | 99.82        | 0.26          |
| BF3KA10012A  | ORS-AF05-12  | Oral- saliva     | Female | Adult    | BHI (Anaerobic)       | 99.9         | 1.08          |
| BF3KA10014A  | ORS-AF05-220 | Oral- saliva     | Female | Adult    | BHI (Anaerobic)       | 96.18        | 0             |
| BF3KA11001   | ORS-AM04-31  | Oral- saliva     | Male   | Adult    | BHI (Aerobic)         | 99.79        | 0.64          |
| BF3KA12001   | ORS-AM05-116 | Oral- saliva     | Male   | Adult    | BHI (Aerobic)         | 99.24        | 0.25          |
| BF3KA12001AB | ORS-AM05-183 | Oral- saliva     | Male   | Adult    | Blood-BHI (Anaerobic) | 99.87        | 0.7           |
| BF3KA12001B  | ORS-AM05-155 | Oral- saliva     | Male   | Adult    | Blood-BHI (Aerobic)   | 99.94        | 0.28          |
| BF3KA12002   | ORS-AM05-117 | Oral- saliva     | Male   | Adult    | BHI (Aerobic)         | 99.34        | 0             |
| BF3KA12003A  | ORS-AM05-344 | Oral- saliva     | Male   | Adult    | BHI (Anaerobic)       | 99.66        | 0.2           |
| BF3KA12004B  | ORS-AM05-325 | Oral- saliva     | Male   | Adult    | Blood-BHI (Aerobic)   | 99.92        | 0.23          |
| BF3KA12005AB | ORS-AM05-355 | Oral- saliva     | Male   | Adult    | Blood-BHI (Anaerobic) | 99.66        | 0.2           |
| BF3KA12006A  | ORS-AM05-478 | Oral- saliva     | Male   | Adult    | BHI (Anaerobic)       | 99.32        | 0             |
| BF3KA12007AB | ORS-AM05-484 | Oral- saliva     | Male   | Adult    | Blood-BHI (Anaerobic) | 99.84        | 0.15          |
| BF3KA13001A  | ORS-TM06-82  | Oral- saliva     | Male   | Teenager | BHI (Anaerobic)       | 98.56        | 0             |
| BF3KA13002A  | ORS-TM06-83  | Oral- saliva     | Male   | Teenager | BHI (Anaerobic)       | 99.45        | 0             |
| BF3KA13003A  | ORS-TM06-84  | Oral- saliva     | Male   | Teenager | BHI (Anaerobic)       | 99.94        | 0.15          |
| BF3KA13009A  | ORS-TM06-215 | Oral- saliva     | Male   | Teenager | BHI (Anaerobic)       | 100          | 0.6           |
| BF3KA13013A  | ORS-TM06-219 | Oral- saliva     | Male   | Teenager | BHI (Anaerobic)       | 100          | 0.51          |
| BF3KA14002A  | ORS-TM07-02  | Oral- saliva     | Male   | Teenager | BHI (Anaerobic)       | 99.63        | 0             |
| BF3KA14002B  | ORS-TM07-230 | Oral- saliva     | Male   | Teenager | Blood-BHI (Aerobic)   | 99.9         | 0.15          |
| BF3KA14003   | ORS-TM07-215 | Oral- saliva     | Male   | Teenager | BHI (Aerobic)         | 99.63        | 0.31          |
| BF3KA14003A  | ORS-TM07-03  | Oral- saliva     | Male   | Teenager | BHI (Anaerobic)       | 99.45        | 0.18          |
| BF3KA14003AB | ORS-TM07-38  | Oral- saliva     | Male   | Teenager | Blood-BHI (Anaerobic) | 100          | 0.34          |
| BF3KA14004AB | ORS-TM07-39  | Oral- saliva     | Male   | Teenager | Blood-BHI (Anaerobic) | 99.66        | 0.68          |
| BF3KA15001AB | ORS-AM08-50  | Oral- saliva     | Male   | Adult    | Blood-BHI (Anaerobic) | 100          | 0             |
| BF3KA15002A  | ORS-AM08-24  | Oral- saliva     | Male   | Adult    | BHI (Anaerobic)       | 99.45        | 0.77          |
| BF3KA15002AB | ORS-AM08-51  | Oral- saliva     | Male   | Adult    | Blood-BHI (Anaerobic) | 99.45        | 0             |
| BF3KA15004AB | ORS-AM08-167 | Oral- saliva     | Male   | Adult    | Blood-BHI (Anaerobic) | 100          | 0             |
| BF3KC09003A  | ODP-AF04-151 | Oral-tooth       | Female | Adult    | BHI (Anaerobic)       | 99.45        | 0             |
| BF3KC09004A  | ODP-AF04-152 | Oral-tooth       | Female | Adult    | BHI (Anaerobic)       | 99.45        | 0             |
| BF3KC09005   | ODP-AF04-71  | Oral-tooth       | Female | Adult    | BHI (Aerobic)         | 99.83        | 0.58          |
| BF3KC09006A  | ODP-AF04-188 | Oral-tooth       | Female | Adult    | BHI (Anaerobic)       | 100          | 0.47          |
| BF3KC09008   | ODP-AF04-74  | Oral-tooth       | Female | Adult    | BHI (Aerobic)         | 99.34        | 0             |
| BF3KC09008A  | ODP-AF04-238 | Oral-tooth       | Female | Adult    | BHI (Anaerobic)       | 100          | 0             |
| BF3KC11001   | ODP-AM04-38  | Oral-tooth       | Male   | Adult    | BHI (Aerobic)         | 99.79        | 0.64          |
| BF3KC11001A  | ODP-AM04-93  | Oral-tooth       | Male   | Adult    | BHI (Anaerobic)       | 99.32        | 0.34          |
| BF3KC12001A  | ODP-AM05-237 | Oral-tooth       | Male   | Adult    | BHI (Anaerobic)       | 99.9         | 0.15          |
| BF3KC12001AB | ODP-AM05-254 | Oral-tooth       | Male   | Adult    | Blood-BHI (Anaerobic) | 100          | 0             |
| BF3KC12002   | ODP-AM05-18  | Oral-tooth       | Male   | Adult    | BHI (Aerobic)         | 99.34        | 0             |
| BF3KC12002AB | ODP-AM05-255 | Oral-tooth       | Male   | Adult    | Blood-BHI (Anaerobic) | 99.45        | 0             |
| BF3KC12003   | ODP-AM05-19  | Oral-tooth       | Male   | Adult    | BHI (Aerobic)         | 99.87        | 0.46          |
| BF3KC12004B  | ODP-AM05-113 | Oral-tooth       | Male   | Adult    | Blood-BHI (Aerobic)   | 98.34        | 0             |
| BF3KC12006   | ODP-AM05-22  | Oral-tooth       | Male   | Adult    | BHI (Aerobic)         | 99.45        | 0.11          |
| BF3KC12006A  | ODP-AM05-411 | Oral-tooth       | Male   | Adult    | BHI (Anaerobic)       | 100          | 1.18          |
| BF3KC13001A  | ODP-TM06-143 | Oral-tooth       | Male   | Teenager | BHI (Anaerobic)       | 99.9         | 0.67          |
| BF3KC13003A  | ODP-TM06-145 | Oral-tooth       | Male   | Teenager | BHI (Anaerobic)       | 99.45        | 0.55          |
| BF3KC14001   | ODP-TM07-197 | Oral-tooth       | Male   | Teenager | BHI (Aerobic)         | 99.49        | 0.76          |
| BF3KC14001A  | ODP-TM07-115 | Oral-tooth       | Male   | Teenager | BHI (Anaerobic)       | 99.45        | 0.18          |
| BF3KC14001AB | ODP-TM07-145 | Oral-tooth       | Male   | Teenager | Blood-BHI (Anaerobic) | 99.45        | 0             |
| BF3KC14001B  | ODP-TM07-209 | Oral-tooth       | Male   | Teenager | Blood-BHI (Aerobic)   | 99.83        | 0.2           |
| BF3KC14002   | ODP-TM07-198 | Oral-tooth       | Male   | Teenager | BHI (Aerobic)         | 100          | 0             |
| BF3KC14003B  | ODP-TM07-325 | Oral-tooth       | Male   | Teenager | Blood-BHI (Aerobic)   | 99.49        | 0.76          |
| BF3KC15001A  | ODP-AM08-279 | Oral-tooth       | Male   | Adult    | BHI (Anaerobic)       | 99.84        | 0.25          |
| BF3KC15002A  | ODP-AM08-280 | Oral-tooth       | Male   | Adult    | BHI (Anaerobic)       | 99.45        | 0.77          |
| BF3KC15004A  | ODP-AM08-282 | Oral-tooth       | Male   | Adult    | BHI (Anaerobic)       | 98.46        | 0             |
| BF3KC15004C  | ODP-AM08-246 | Oral-tooth       | Male   | Adult    | BHI (Aerobic)         | 99.34        | 0             |
| BF3KC15006A  | ODP-AM08-284 | Oral-tooth       | Male   | Adult    | BHI (Anaerobic)       | 100          | 0.47          |
| BF3KC15011A  | ODP-AM08-377 | Oral-tooth       | Male   | Adult    | BHI (Anaerobic)       | 100          | 0.47          |
| BF3KC15013A  | ODP-AM08-379 | Oral-tooth       | Male   | Adult    | BHI (Anaerobic)       | 100          | 0.47          |
| BF3KC15015A  | ODP-AM08-381 | Oral-tooth       | Male   | Adult    | BHI (Anaerobic)       | 100          | 1.18          |
| BF3KC15016A  | ODP-AM08-382 | Oral-tooth       | Male   | Adult    | BHI (Anaerobic)       | 100          | 0.71          |
| BF3KC15020A  | ODP-AM08-386 | Oral-tooth       | Male   | Adult    | BHI (Anaerobic)       | 100          | 0             |
| BF3KC16005   | ODP-AF06-100 | Oral-tooth       | Female | Adult    | BHI (Aerobic)         | 99.49        | 0.76          |
| BF3KT08002   | ORT-AF03-65  | Oral-tongue coat | Female | Adult    | BHI (Aerobic)         | 99.11        | 0             |
| BF3KT08005   | ORT-AF03-68  | Oral-tongue coat | Female | Adult    | BHI (Aerobic)         | 97.22        | 0.29          |
| BF3KT09001   | ORT-AF04-01  | Oral-tongue coat | Female | Adult    | BHI (Aerobic)         | 99.83        | 0.58          |
| BF3KT09001A  | ORT-AF04-115 | Oral-tongue coat | Female | Adult    | BHI (Anaerobic)       | 100          | 0             |
| BF3KT09002A  | ORT-AF04-116 | Oral-tongue coat | Female | Adult    | BHI (Anaerobic)       | 100          | 0.17          |
| BF3KT09003A  | ORT-AF04-169 | Oral-tongue coat | Female | Adult    | BHI (Anaerobic)       | 100          | 0.47          |
| BF3KT09005A  | ORT-AF04-215 | Oral-tongue coat | Female | Adult    | BHI (Anaerobic)       | 99.46        | 0             |
| BF3KT09006A  | ORT-AF04-216 | Oral-tongue coat | Female | Adult    | BHI (Anaerobic)       | 100          | 0.17          |
| BF3KT09007A  | ORT-AF04-246 | Oral-tongue coat | Female | Adult    | BHI (Anaerobic)       | 99.62        | 0.07          |

|              |              |                  |        |          |                                    |       |      |
|--------------|--------------|------------------|--------|----------|------------------------------------|-------|------|
| BF3KT11001   | ORT-AM04-01  | Oral-tongue coat | Male   | Adult    | BHI (Aerobic)                      | 99.79 | 0.64 |
| BF3KT11001A  | ORT-AM04-53  | Oral-tongue coat | Male   | Adult    | BHI (Anaerobic)                    | 99.9  | 0.58 |
| BF3KT11003A  | ORT-AM04-76  | Oral-tongue coat | Male   | Adult    | BHI (Anaerobic)                    | 99.45 | 0    |
| BF3KT12001B  | ORT-AM05-52  | Oral-tongue coat | Male   | Adult    | Blood-BHI (Aerobic)                | 99.67 | 0.23 |
| BF3KT12005   | ORT-AM05-291 | Oral-tongue coat | Male   | Adult    | BHI (Aerobic)                      | 99.4  | 0.68 |
| BF3KT12005AB | ORT-AM05-406 | Oral-tongue coat | Male   | Adult    | Blood-BHI (Anaerobic)              | 100   | 0.47 |
| BF3KT12006A  | ORT-AM05-398 | Oral-tongue coat | Male   | Adult    | BHI (Anaerobic)                    | 100   | 0    |
| BF3KT12006AB | ORT-AM05-453 | Oral-tongue coat | Male   | Adult    | BHI (Aerobic)                      | 99    | 0.09 |
| BF3KT12007A  | ORT-AM05-445 | Oral-tongue coat | Male   | Adult    | BHI (Aerobic)                      | 99.45 | 0.27 |
| BF3KT12008A  | ORT-AM05-446 | Oral-tongue coat | Male   | Adult    | BHI (Aerobic)                      | 100   | 0.34 |
| BF3KT13002   | ORT-TM06-63  | Oral-tongue coat | Male   | Teenager | BHI (Aerobic)                      | 98.08 | 0    |
| BF3KT14001   | ORT-TM07-175 | Oral-tongue coat | Male   | Teenager | BHI (Aerobic)                      | 96.84 | 0    |
| BF3KT14001A  | ORT-TM07-80  | Oral-tongue coat | Male   | Teenager | BHI (Anaerobic)                    | 99.45 | 0.27 |
| BF3KT14001B  | ORT-TM07-301 | Oral-tongue coat | Male   | Teenager | Blood-BHI (Aerobic)                | 99.49 | 0.76 |
| BF3KT14002AB | ORT-TM07-98  | Oral-tongue coat | Male   | Teenager | Blood-BHI (Anaerobic)              | 99.45 | 0    |
| BF3KT14003AB | ORT-TM07-99  | Oral-tongue coat | Male   | Teenager | Blood-BHI (Anaerobic)              | 100   | 0.34 |
| BF3KT15001   | ORT-AM08-194 | Oral-tongue coat | Male   | Adult    | BHI (Aerobic)                      | 99.79 | 0.15 |
| BF3KT15002   | ORT-AM08-195 | Oral-tongue coat | Male   | Adult    | BHI (Aerobic)                      | 99.17 | 0.3  |
| BF3KT15003B  | ORT-AM08-219 | Oral-tongue coat | Male   | Adult    | Blood-BHI (Aerobic)                | 100   | 0    |
| BF3KT16001   | ORT-AF06-01  | Oral-tongue coat | Female | Adult    | BHI (Aerobic)                      | 99.49 | 0.76 |
| GF3KA08002B  | ORS-AF03-49  | Oral- saliva     | Female | Adult    | Blood-Columbia Medium (Aerobic)    | 100   | 0.47 |
| GF3KA09001A  | ORS-AF04-127 | Oral- saliva     | Female | Adult    | Columbia Medium (Anaerobic)        | 100   | 0    |
| GF3KA09003A  | ORS-AF04-129 | Oral- saliva     | Female | Adult    | Columbia Medium (Anaerobic)        | 100   | 0.41 |
| GF3KA09004   | ORS-AF04-41  | Oral- saliva     | Female | Adult    | Columbia Medium (Aerobic)          | 100   | 0    |
| GF3KA09004A  | ORS-AF04-183 | Oral- saliva     | Female | Adult    | Columbia Medium (Anaerobic)        | 100   | 0    |
| GF3KA09005   | ORS-AF04-42  | Oral- saliva     | Female | Adult    | Columbia Medium (Aerobic)          | 99.82 | 0.26 |
| GF3KA09006A  | ORS-AF04-234 | Oral- saliva     | Female | Adult    | Columbia Medium (Anaerobic)        | 100   | 0.18 |
| GF3KA10002A  | ORS-AF05-14  | Oral- saliva     | Female | Adult    | Columbia Medium (Anaerobic)        | 99.9  | 1.08 |
| GF3KA10003A  | ORS-AF05-15  | Oral- saliva     | Female | Adult    | Columbia Medium (Anaerobic)        | 99.83 | 0.58 |
| GF3KA10004A  | ORS-AF05-16  | Oral- saliva     | Female | Adult    | Columbia Medium (Anaerobic)        | 99.9  | 1.08 |
| GF3KA10006   | ORS-AF05-242 | Oral- saliva     | Female | Adult    | Columbia Medium (Aerobic)          | 99.46 | 0.58 |
| GF3KA10007A  | ORS-AF05-19  | Oral- saliva     | Female | Adult    | Columbia Medium (Anaerobic)        | 98.28 | 0.14 |
| GF3KA11002A  | ORS-AM04-85  | Oral- saliva     | Male   | Adult    | Columbia Medium (Anaerobic)        | 99.45 | 0    |
| GF3KA12001   | ORS-AM05-121 | Oral- saliva     | Male   | Adult    | Columbia Medium (Aerobic)          | 99.94 | 0.28 |
| GF3KA12002   | ORS-AM05-122 | Oral- saliva     | Male   | Adult    | Columbia Medium (Aerobic)          | 99.87 | 0.46 |
| GF3KA12004   | ORS-AM05-124 | Oral- saliva     | Male   | Adult    | Columbia Medium (Aerobic)          | 99.4  | 0    |
| GF3KA12006AB | ORS-AM05-357 | Oral- saliva     | Male   | Adult    | Blood-Columbia Medium (Anaerobic); | 100   | 0.17 |
| GF3KA12007AB | ORS-AM05-485 | Oral- saliva     | Male   | Adult    | Blood-Columbia Medium (Anaerobic); | 99.66 | 0.2  |
| GF3KA13001A  | ORS-TM06-89  | Oral- saliva     | Male   | Teenager | Columbia Medium (Anaerobic)        | 99.63 | 0.37 |
| GF3KA13002   | ORS-TM06-15  | Oral- saliva     | Male   | Teenager | Columbia Medium (Aerobic)          | 99.95 | 0.51 |
| GF3KA13002A  | ORS-TM06-90  | Oral- saliva     | Male   | Teenager | Columbia Medium (Anaerobic)        | 98.46 | 0    |
| GF3KA13003   | ORS-TM06-16  | Oral- saliva     | Male   | Teenager | Columbia Medium (Aerobic)          | 100   | 1.42 |
| GF3KA13003A  | ORS-TM06-91  | Oral- saliva     | Male   | Teenager | Columbia Medium (Anaerobic)        | 98.91 | 0.55 |
| GF3KA13005A  | ORS-TM06-93  | Oral- saliva     | Male   | Teenager | Columbia Medium (Anaerobic)        | 99.45 | 0    |
| GF3KA13006   | ORS-TM06-240 | Oral- saliva     | Male   | Teenager | Columbia Medium (Aerobic)          | 99.11 | 0    |
| GF3KA13006A  | ORS-TM06-94  | Oral- saliva     | Male   | Teenager | Columbia Medium (Anaerobic)        | 98.91 | 0.55 |
| GF3KA13011A  | ORS-TM06-222 | Oral- saliva     | Male   | Teenager | Columbia Medium (Anaerobic)        | 99.84 | 0.15 |
| GF3KA14001AB | ORS-TM07-40  | Oral- saliva     | Male   | Teenager | Blood-Columbia Medium (Anaerobic); | 99.63 | 0    |
| GF3KA15001A  | ORS-AM08-28  | Oral- saliva     | Male   | Adult    | Columbia Medium (Anaerobic)        | 100   | 0.17 |
| GF3KA15003A  | ORS-AM08-30  | Oral- saliva     | Male   | Adult    | Columbia Medium (Anaerobic)        | 100   | 0    |
| GF3KA15005AB | ORS-AM08-168 | Oral- saliva     | Male   | Adult    | Blood-Columbia Medium (Anaerobic); | 99.66 | 0.11 |
| GF3KA16003   | ORS-AF06-69  | Oral- saliva     | Female | Adult    | Columbia Medium (Aerobic)          | 100   | 0    |
| GF3KC09002A  | ODP-AF04-155 | Oral-tooth       | Female | Adult    | Columbia Medium (Anaerobic)        | 99.45 | 0    |
| GF3KC09003   | ODP-AF04-78  | Oral-tooth       | Female | Adult    | Columbia Medium (Aerobic)          | 99.11 | 0    |
| GF3KC09005A  | ODP-AF04-158 | Oral-tooth       | Female | Adult    | Columbia Medium (Anaerobic)        | 99.45 | 0    |
| GF3KC09008A  | ODP-AF04-190 | Oral-tooth       | Female | Adult    | Columbia Medium (Anaerobic)        | 100   | 0.47 |
| GF3KC10001A  | ODP-AF05-68  | Oral-tooth       | Female | Adult    | Columbia Medium (Anaerobic)        | 100   | 0.23 |
| GF3KC10002A  | ODP-AF05-69  | Oral-tooth       | Female | Adult    | Columbia Medium (Anaerobic)        | 100   | 0.23 |
| GF3KC11001A  | ODP-AM04-97  | Oral-tooth       | Male   | Adult    | Columbia Medium (Anaerobic)        | 99.32 | 0    |
| GF3KC11002A  | ODP-AM04-98  | Oral-tooth       | Male   | Adult    | Columbia Medium (Anaerobic)        | 99.32 | 0    |
| GF3KC11003A  | ODP-AM04-99  | Oral-tooth       | Male   | Adult    | Columbia Medium (Anaerobic)        | 100   | 0    |
| GF3KC11005A  | ODP-AM04-101 | Oral-tooth       | Male   | Adult    | Columbia Medium (Anaerobic)        | 100   | 0    |
| GF3KC12001   | ODP-AM05-24  | Oral-tooth       | Male   | Adult    | Columbia Medium (Aerobic)          | 100   | 0    |
| GF3KC12002   | ODP-AM05-25  | Oral-tooth       | Male   | Adult    | Columbia Medium (Aerobic)          | 99.87 | 0.2  |
| GF3KC12002A  | ODP-AM05-415 | Oral-tooth       | Male   | Adult    | Columbia Medium (Anaerobic)        | 100   | 0    |
| GF3KC12002B  | ODP-AM05-306 | Oral-tooth       | Male   | Adult    | Blood-Columbia Medium (Aerobic)    | 99.66 | 0.45 |
| GF3KC12004B  | ODP-AM05-321 | Oral-tooth       | Male   | Adult    | Blood-Columbia Medium (Aerobic)    | 99.7  | 0    |
| GF3KC12005AB | ODP-AM05-388 | Oral-tooth       | Male   | Adult    | Blood-Columbia Medium (Anaerobic); | 98.37 | 0    |
| GF3KC12006A  | ODP-AM05-419 | Oral-tooth       | Male   | Adult    | Columbia Medium (Anaerobic)        | 100   | 0.47 |
| GF3KC12007A  | ODP-AM05-420 | Oral-tooth       | Male   | Adult    | Columbia Medium (Anaerobic)        | 100   | 1.42 |
| GF3KC12007AB | ODP-AM05-461 | Oral-tooth       | Male   | Adult    | Columbia Medium (Aerobic)          | 100   | 1.42 |
| GF3KC12010A  | ODP-AM05-423 | Oral-tooth       | Male   | Adult    | Columbia Medium (Anaerobic)        | 100   | 1.7  |
| GF3KC12011A  | ODP-AM05-501 | Oral-tooth       | Male   | Adult    | Columbia Medium (Anaerobic)        | 100   | 0    |
| GF3KC13001A  | ODP-TM06-148 | Oral-tooth       | Male   | Teenager | Columbia Medium (Anaerobic)        | 99.49 | 0.17 |
| GF3KC13002A  | ODP-TM06-149 | Oral-tooth       | Male   | Teenager | Columbia Medium (Anaerobic)        | 100   | 0.17 |
| GF3KC13003A  | ODP-TM06-150 | Oral-tooth       | Male   | Teenager | Columbia Medium (Anaerobic)        | 99.49 | 0.17 |
| GF3KC14001A  | ODP-TM07-125 | Oral-tooth       | Male   | Teenager | Columbia Medium (Anaerobic)        | 99.45 | 0    |
| GF3KC14002   | ODP-TM07-288 | Oral-tooth       | Male   | Teenager | Columbia Medium (Aerobic)          | 99.49 | 0.76 |
| GF3KC14002AB | ODP-TM07-152 | Oral-tooth       | Male   | Teenager | Blood-Columbia Medium (Anaerobic); | 99.45 | 0    |
| GF3KC15001A  | ODP-AM08-289 | Oral-tooth       | Male   | Adult    | Columbia Medium (Anaerobic)        | 99.45 | 0.82 |
| GF3KC15002   | ODP-AM08-343 | Oral-tooth       | Male   | Adult    | Columbia Medium (Aerobic)          | 100   | 0    |
| GF3KC15004A  | ODP-AM08-292 | Oral-tooth       | Male   | Adult    | Columbia Medium (Anaerobic)        | 100   | 0    |
| GF3KC15006B  | ODP-AM08-257 | Oral-tooth       | Male   | Adult    | Blood-Columbia Medium (Aerobic)    | 100   | 0.47 |
| GF3KC15009A  | ODP-AM08-297 | Oral-tooth       | Male   | Adult    | Columbia Medium (Anaerobic)        | 98.46 | 0    |
| GF3KT09001A  | ORT-AF04-117 | Oral-tongue coat | Female | Adult    | Columbia Medium (Anaerobic)        | 100   | 0.23 |
| GF3KT09002A  | ORT-AF04-118 | Oral-tongue coat | Female | Adult    | Columbia Medium (Anaerobic)        | 100   | 0.23 |

|              |              |                  |        |          |                                   |       |      |
|--------------|--------------|------------------|--------|----------|-----------------------------------|-------|------|
| GF3KT09003A  | ORT-AF04-170 | Oral-tongue coat | Female | Adult    | Columbia Medium (Anaerobic)       | 100   | 0    |
| GF3KT09005   | ORT-AF04-192 | Oral-tongue coat | Female | Adult    | Columbia Medium (Aerobic)         | 99.83 | 0.58 |
| GF3KT09005A  | ORT-AF04-217 | Oral-tongue coat | Female | Adult    | Columbia Medium (Anaerobic)       | 100   | 0.15 |
| GF3KT10001A  | ORT-AF05-103 | Oral-tongue coat | Female | Adult    | Columbia Medium (Anaerobic)       | 100   | 0.41 |
| GF3KT10002A  | ORT-AF05-104 | Oral-tongue coat | Female | Adult    | Columbia Medium (Anaerobic)       | 100   | 0    |
| GF3KT10003A  | ORT-AF05-105 | Oral-tongue coat | Female | Adult    | Columbia Medium (Anaerobic)       | 100   | 0    |
| GF3KT10004A  | ORT-AF05-106 | Oral-tongue coat | Female | Adult    | Columbia Medium (Anaerobic)       | 99.83 | 0.58 |
| GF3KT10006A  | ORT-AF05-108 | Oral-tongue coat | Female | Adult    | Columbia Medium (Anaerobic)       | 99.83 | 0.58 |
| GF3KT11001   | ORT-AM04-05  | Oral-tongue coat | Male   | Adult    | Columbia Medium (Aerobic)         | 100   | 0    |
| GF3KT11002   | ORT-AM04-06  | Oral-tongue coat | Male   | Adult    | Columbia Medium (Aerobic)         | 99.33 | 0    |
| GF3KT11003   | ORT-AM04-07  | Oral-tongue coat | Male   | Adult    | Columbia Medium (Aerobic)         | 100   | 0.34 |
| GF3KT11003A  | ORT-AM04-127 | Oral-tongue coat | Male   | Adult    | Columbia Medium (Anaerobic)       | 100   | 0    |
| GF3KT12001   | ORT-AM05-05  | Oral-tongue coat | Male   | Adult    | Columbia Medium (Aerobic)         | 99.32 | 0.47 |
| GF3KT12002AB | ORT-AM05-94  | Oral-tongue coat | Male   | Adult    | Blood-Columbia Medium (Anaerobic) | 99.87 | 0.3  |
| GF3KT12002B  | ORT-AM05-110 | Oral-tongue coat | Male   | Adult    | Blood-Columbia Medium (Aerobic)   | 99.33 | 3.56 |
| GF3KT12003AB | ORT-AM05-95  | Oral-tongue coat | Male   | Adult    | Blood-Columbia Medium (Anaerobic) | 96.2  | 0    |
| GF3KT12004A  | ORT-AM05-449 | Oral-tongue coat | Male   | Adult    | Columbia Medium (Aerobic)         | 99.32 | 0    |
| GF3KT12004AB | ORT-AM05-96  | Oral-tongue coat | Male   | Adult    | Blood-Columbia Medium (Anaerobic) | 99.45 | 0.27 |
| GF3KT12005A  | ORT-AM05-450 | Oral-tongue coat | Male   | Adult    | Columbia Medium (Aerobic)         | 99.66 | 0    |
| GF3KT12006AB | ORT-AM05-288 | Oral-tongue coat | Male   | Adult    | Blood-Columbia Medium (Anaerobic) | 99.45 | 0    |
| GF3KT12008A  | ORT-AM05-520 | Oral-tongue coat | Male   | Adult    | Columbia Medium (Anaerobic)       | 100   | 0.47 |
| GF3KT12009AB | ORT-AM05-455 | Oral-tongue coat | Male   | Adult    | Columbia Medium (Aerobic)         | 98.28 | 0    |
| GF3KT13001A  | ORT-TM06-169 | Oral-tongue coat | Male   | Teenager | Columbia Medium (Anaerobic)       | 99.49 | 0.17 |
| GF3KT13002A  | ORT-TM06-170 | Oral-tongue coat | Male   | Teenager | Columbia Medium (Anaerobic)       | 99.45 | 0.27 |
| GF3KT13003   | ORT-TM06-66  | Oral-tongue coat | Male   | Teenager | Columbia Medium (Aerobic)         | 100   | 0.07 |
| GF3KT14001   | ORT-TM07-178 | Oral-tongue coat | Male   | Teenager | Columbia Medium (Aerobic)         | 99.49 | 0.76 |
| GF3KT15003   | ORT-AM08-200 | Oral-tongue coat | Male   | Adult    | Columbia Medium (Aerobic)         | 99.79 | 0.15 |
| GF3KT15004B  | ORT-AM08-223 | Oral-tongue coat | Male   | Adult    | Blood-Columbia Medium (Aerobic)   | 99.33 | 0    |
| GF3KT16003   | ORT-AF06-92  | Oral-tongue coat | Female | Adult    | Columbia Medium (Aerobic)         | 99.33 | 0    |
| HF3KA08001A  | ORS-AF03-141 | Oral- saliva     | Female | Adult    | H Medium (Anaerobic)              | 99.83 | 1.06 |
| HF3KA08001B  | ORS-AF03-52  | Oral- saliva     | Female | Adult    | Blood-H Medium (Aerobic)          | 99.34 | 0    |
| HF3KA08002A  | ORS-AF03-142 | Oral- saliva     | Female | Adult    | H Medium (Anaerobic)              | 99.25 | 0.96 |
| HF3KA08006B  | ORS-AF03-251 | Oral- saliva     | Female | Adult    | Blood-H Medium (Aerobic)          | 100   | 0.47 |
| HF3KA09001A  | ORS-AF04-136 | Oral- saliva     | Female | Adult    | H Medium (Anaerobic)              | 99.83 | 0.58 |
| HF3KA09002A  | ORS-AF04-137 | Oral- saliva     | Female | Adult    | H Medium (Anaerobic)              | 99.83 | 0.58 |
| HF3KA09005A  | ORS-AF04-140 | Oral- saliva     | Female | Adult    | H Medium (Anaerobic)              | 99.45 | 0    |
| HF3KA10004A  | ORS-AF05-23  | Oral- saliva     | Female | Adult    | H Medium (Anaerobic)              | 99.83 | 0.58 |
| HF3KA10005A  | ORS-AF05-24  | Oral- saliva     | Female | Adult    | H Medium (Anaerobic)              | 99.83 | 0.58 |
| HF3KA11001A  | ORS-AM04-86  | Oral- saliva     | Male   | Adult    | H Medium (Anaerobic)              | 100   | 0    |
| HF3KA12001   | ORS-AM05-127 | Oral- saliva     | Male   | Adult    | H Medium (Aerobic)                | 99.4  | 0    |
| HF3KA12001A  | ORS-AM05-172 | Oral- saliva     | Male   | Adult    | H Medium (Anaerobic)              | 99.4  | 0    |
| HF3KA12002   | ORS-AM05-128 | Oral- saliva     | Male   | Adult    | H Medium (Aerobic)                | 99    | 0.09 |
| HF3KA12002AB | ORS-AM05-193 | Oral- saliva     | Male   | Adult    | Blood-H Medium (Anaerobic)        | 100   | 0.34 |
| HF3KA12003AB | ORS-AM05-194 | Oral- saliva     | Male   | Adult    | Blood-H Medium (Anaerobic)        | 99.87 | 0.3  |
| HF3KA12004B  | ORS-AM05-167 | Oral- saliva     | Male   | Adult    | Blood-H Medium (Aerobic)          | 99.4  | 0    |
| HF3KA12005AB | ORS-AM05-196 | Oral- saliva     | Male   | Adult    | Blood-H Medium (Anaerobic)        | 99.34 | 0    |
| HF3KA12006A  | ORS-AM05-374 | Oral- saliva     | Male   | Adult    | H Medium (Anaerobic)              | 99.52 | 0    |
| HF3KA12006AB | ORS-AM05-358 | Oral- saliva     | Male   | Adult    | Blood-H Medium (Anaerobic)        | 100   | 0.56 |
| HF3KA12009AB | ORS-AM05-381 | Oral- saliva     | Male   | Adult    | Blood-H Medium (Anaerobic)        | 100   | 0    |
| HF3KA13001   | ORS-TM06-19  | Oral- saliva     | Male   | Teenager | H Medium (Aerobic)                | 99.34 | 0    |
| HF3KA13002A  | ORS-TM06-96  | Oral- saliva     | Male   | Teenager | H Medium (Anaerobic)              | 99.63 | 0    |
| HF3KA13003A  | ORS-TM06-97  | Oral- saliva     | Male   | Teenager | H Medium (Anaerobic)              | 98.08 | 0    |
| HF3KA13005A  | ORS-TM06-99  | Oral- saliva     | Male   | Teenager | H Medium (Anaerobic)              | 99.45 | 0    |
| HF3KA13006A  | ORS-TM06-100 | Oral- saliva     | Male   | Teenager | H Medium (Anaerobic)              | 98.37 | 0    |
| HF3KA13012A  | ORS-TM06-224 | Oral- saliva     | Male   | Teenager | H Medium (Anaerobic)              | 99.4  | 1.02 |
| HF3KA13014A  | ORS-TM06-226 | Oral- saliva     | Male   | Teenager | H Medium (Anaerobic)              | 100   | 0    |
| HF3KA14001   | ORS-TM07-219 | Oral- saliva     | Male   | Teenager | H Medium (Aerobic)                | 99.82 | 0.2  |
| HF3KA14004A  | ORS-TM07-11  | Oral- saliva     | Male   | Teenager | H Medium (Anaerobic)              | 99.63 | 0    |
| HF3KA15001A  | ORS-AM08-152 | Oral- saliva     | Male   | Adult    | H Medium (Anaerobic)              | 100   | 0.47 |
| HF3KA15001AB | ORS-AM08-56  | Oral- saliva     | Male   | Adult    | Blood-H Medium (Anaerobic)        | 99.88 | 0    |
| HF3KA15004AB | ORS-AM08-171 | Oral- saliva     | Male   | Adult    | Blood-H Medium (Anaerobic)        | 99.45 | 0    |
| HF3KA15004B  | ORS-AM08-101 | Oral- saliva     | Male   | Adult    | Blood-H Medium (Aerobic)          | 99.33 | 0    |
| HF3KA16008   | ORS-AF06-121 | Oral- saliva     | Female | Adult    | H Medium (Aerobic)                | 100   | 0    |
| HF3KA16011   | ORS-AF06-159 | Oral- saliva     | Female | Adult    | H Medium (Aerobic)                | 99.66 | 0.17 |
| HF3KC09003   | ODP-AF04-83  | Oral-tooth       | Female | Adult    | H Medium (Aerobic)                | 99.77 | 1.1  |
| HF3KC12001AB | ODP-AM05-262 | Oral-tooth       | Male   | Adult    | Blood-H Medium (Anaerobic)        | 99    | 0.09 |
| HF3KC12002A  | ODP-AM05-425 | Oral-tooth       | Male   | Adult    | H Medium (Anaerobic)              | 100   | 0    |
| HF3KC12002AB | ODP-AM05-263 | Oral-tooth       | Male   | Adult    | Blood-H Medium (Anaerobic)        | 99.57 | 0.6  |
| HF3KC12003AB | ODP-AM05-390 | Oral-tooth       | Male   | Adult    | Blood-H Medium (Anaerobic)        | 100   | 0.95 |
| HF3KC12004AB | ODP-AM05-456 | Oral-tooth       | Male   | Adult    | H Medium (Aerobic)                | 99.37 | 0    |
| HF3KC12005A  | ODP-AM05-463 | Oral-tooth       | Male   | Adult    | H Medium (Aerobic)                | 100   | 0    |
| HF3KC12005AB | ODP-AM05-457 | Oral-tooth       | Male   | Adult    | H Medium (Aerobic)                | 99.82 | 0.54 |
| HF3KC12005B  | ODP-AM05-322 | Oral-tooth       | Male   | Adult    | Blood-H Medium (Aerobic)          | 99.11 | 0    |
| HF3KC12006AB | ODP-AM05-458 | Oral-tooth       | Male   | Adult    | H Medium (Aerobic)                | 99.82 | 0.54 |
| HF3KC12007   | ODP-AM05-296 | Oral-tooth       | Male   | Adult    | H Medium (Aerobic)                | 99.34 | 0    |
| HF3KC13001   | ODP-TM06-47  | Oral-tooth       | Male   | Teenager | H Medium (Aerobic)                | 100   | 0    |
| HF3KC13001A  | ODP-TM06-151 | Oral-tooth       | Male   | Teenager | H Medium (Anaerobic)              | 99.84 | 0.15 |
| HF3KC13002A  | ODP-TM06-152 | Oral-tooth       | Male   | Teenager | H Medium (Anaerobic)              | 100   | 0.47 |
| HF3KC13003A  | ODP-TM06-153 | Oral-tooth       | Male   | Teenager | H Medium (Anaerobic)              | 98.37 | 0    |
| HF3KC13005A  | ODP-TM06-155 | Oral-tooth       | Male   | Teenager | H Medium (Anaerobic)              | 99.45 | 0    |
| HF3KC14001AB | ODP-TM07-155 | Oral-tooth       | Male   | Teenager | Blood-H Medium (Anaerobic)        | 99.45 | 0    |
| HF3KC14002   | ODP-TM07-290 | Oral-tooth       | Male   | Teenager | H Medium (Aerobic)                | 100   | 0.76 |
| HF3KC14003AB | ODP-TM07-157 | Oral-tooth       | Male   | Teenager | Blood-H Medium (Anaerobic)        | 100   | 0    |
| HF3KC15001AB | ODP-AM08-403 | Oral-tooth       | Male   | Adult    | Blood-H Medium (Anaerobic)        | 99.45 | 0    |
| HF3KC15002   | ODP-AM08-350 | Oral-tooth       | Male   | Adult    | H Medium (Aerobic)                | 99.9  | 0.15 |
| HF3KC15002A  | ODP-AM08-302 | Oral-tooth       | Male   | Adult    | H Medium (Anaerobic)              | 99.75 | 0.25 |

|              |              |                  |        |          |                               |       |      |
|--------------|--------------|------------------|--------|----------|-------------------------------|-------|------|
| HF3KC15004A  | ODP-AM08-304 | Oral-tooth       | Male   | Adult    | H Medium (Anaerobic)          | 98.56 | 0.57 |
| HF3KC15009A  | ODP-AM08-392 | Oral-tooth       | Male   | Adult    | H Medium (Anaerobic)          | 100   | 0    |
| HF3KC15010A  | ODP-AM08-393 | Oral-tooth       | Male   | Adult    | H Medium (Anaerobic)          | 98.56 | 0    |
| HF3KC16002B  | ODP-AF06-108 | Oral-tooth       | Female | Adult    | Blood-H Medium (Aerobic)      | 99.78 | 0.6  |
| HF3KT08002   | ORT-AF03-76  | Oral-tongue coat | Female | Adult    | H Medium (Aerobic)            | 98.37 | 0    |
| HF3KT08003A  | ORT-AF03-129 | Oral-tongue coat | Female | Adult    | H Medium (Anaerobic)          | 100   | 1.44 |
| HF3KT09001   | ORT-AF04-11  | Oral-tongue coat | Female | Adult    | H Medium (Aerobic)            | 99.83 | 0.58 |
| HF3KT09002A  | ORT-AF04-173 | Oral-tongue coat | Female | Adult    | H Medium (Anaerobic)          | 99.32 | 0.34 |
| HF3KT09003A  | ORT-AF04-221 | Oral-tongue coat | Female | Adult    | H Medium (Anaerobic)          | 100   | 0.07 |
| HF3KT10001A  | ORT-AF05-109 | Oral-tongue coat | Female | Adult    | H Medium (Anaerobic)          | 99.63 | 0    |
| HF3KT10005A  | ORT-AF05-113 | Oral-tongue coat | Female | Adult    | H Medium (Anaerobic)          | 99.45 | 0.27 |
| HF3KT10010A  | ORT-AF05-230 | Oral-tongue coat | Female | Adult    | H Medium (Anaerobic)          | 100   | 0    |
| HF3KT11004   | ORT-AM04-12  | Oral-tongue coat | Male   | Adult    | H Medium (Aerobic)            | 98.56 | 0.57 |
| HF3KT12001A  | ORT-AM05-89  | Oral-tongue coat | Male   | Adult    | H Medium (Anaerobic)          | 99.47 | 0.2  |
| HF3KT12001B  | ORT-AM05-54  | Oral-tongue coat | Male   | Adult    | Blood-H Medium (Aerobic)      | 99.67 | 0.23 |
| HF3KT12002   | ORT-AM05-111 | Oral-tongue coat | Male   | Adult    | H Medium (Aerobic)            | 99.92 | 0.45 |
| HF3KT12003   | ORT-AM05-314 | Oral-tongue coat | Male   | Adult    | H Medium (Aerobic)            | 99.96 | 0.49 |
| HF3KT12003AB | ORT-AM05-235 | Oral-tongue coat | Male   | Adult    | Blood-H Medium (Anaerobic)    | 99.45 | 0.27 |
| HF3KT12004   | ORT-AM05-320 | Oral-tongue coat | Male   | Adult    | H Medium (Aerobic)            | 99.4  | 0    |
| HF3KT12004A  | ORT-AM05-507 | Oral-tongue coat | Male   | Adult    | H Medium (Anaerobic)          | 99.84 | 0.15 |
| HF3KT12004B  | ORT-AM05-317 | Oral-tongue coat | Male   | Adult    | Blood-H Medium (Aerobic)      | 99.96 | 0.49 |
| HF3KT13001A  | ORT-TM06-175 | Oral-tongue coat | Male   | Teenager | H Medium (Anaerobic)          | 99.84 | 2.77 |
| HF3KT13002A  | ORT-TM06-176 | Oral-tongue coat | Male   | Teenager | H Medium (Anaerobic)          | 99.45 | 0    |
| HF3KT13003A  | ORT-TM06-177 | Oral-tongue coat | Male   | Teenager | H Medium (Anaerobic)          | 100   | 0.47 |
| HF3KT14001   | ORT-TM07-185 | Oral-tongue coat | Male   | Teenager | H Medium (Aerobic)            | 100   | 0    |
| HF3KT14001A  | ORT-TM07-82  | Oral-tongue coat | Male   | Teenager | H Medium (Anaerobic)          | 100   | 0.59 |
| HF3KT14002B  | ORT-TM07-206 | Oral-tongue coat | Male   | Teenager | Blood-H Medium (Aerobic)      | 99.33 | 0.67 |
| HF3KT15001AB | ORT-AM08-461 | Oral-tongue coat | Male   | Adult    | Blood-H Medium (Anaerobic)    | 99.45 | 0    |
| HF3KT16001   | ORT-AF06-04  | Oral-tongue coat | Female | Adult    | H Medium (Aerobic)            | 100   | 0    |
| HF3KT16004   | ORT-AF06-93  | Oral-tongue coat | Female | Adult    | H Medium (Aerobic)            | 99.49 | 0.76 |
| HF3KT16005   | ORT-AF06-141 | Oral-tongue coat | Female | Adult    | H Medium (Aerobic)            | 99.33 | 0    |
| IF3KA08003BA | ORS-AF03-170 | Oral- saliva     | Female | Adult    | Blood-MPYG Medium (Anaerobic) | 99.82 | 0.66 |
| IF3KA09001BA | ORS-AF04-147 | Oral- saliva     | Female | Adult    | Blood-MPYG Medium (Anaerobic) | 100   | 0.47 |
| IF3KA09003BA | ORS-AF04-237 | Oral- saliva     | Female | Adult    | Blood-MPYG Medium (Anaerobic) | 100   | 0.47 |
| IF3KA09004A  | ORS-AF04-133 | Oral- saliva     | Female | Adult    | MPYG Medium (Anaerobic)       | 100   | 0    |
| IF3KA09005A  | ORS-AF04-134 | Oral- saliva     | Female | Adult    | MPYG Medium (Anaerobic)       | 100   | 0    |
| IF3KA11001   | ORS-AM04-35  | Oral- saliva     | Male   | Adult    | MPYG Medium (Aerobic)         | 99.9  | 0.58 |
| IF3KA12001AB | ORS-AM05-197 | Oral- saliva     | Male   | Adult    | Blood-MPYG Medium (Anaerobic) | 99.42 | 0.2  |
| IF3KA12002AB | ORS-AM05-198 | Oral- saliva     | Male   | Adult    | Blood-MPYG Medium (Anaerobic) | 100   | 0    |
| IF3KA12002B  | ORS-AM05-342 | Oral- saliva     | Male   | Adult    | Blood-MPYG Medium (Aerobic)   | 99.38 | 1.14 |
| IF3KA12003   | ORS-AM05-133 | Oral- saliva     | Male   | Adult    | MPYG Medium (Aerobic)         | 99.62 | 0.17 |
| IF3KA12003A  | ORS-AM05-177 | Oral- saliva     | Male   | Adult    | MPYG Medium (Anaerobic)       | 99    | 0.09 |
| IF3KA12004AB | ORS-AM05-382 | Oral- saliva     | Male   | Adult    | Blood-MPYG Medium (Anaerobic) | 100   | 0.47 |
| IF3KA12007A  | ORS-AM05-481 | Oral- saliva     | Male   | Adult    | MPYG Medium (Anaerobic)       | 99.42 | 0.44 |
| IF3KA12008AB | ORS-AM05-490 | Oral- saliva     | Male   | Adult    | Blood-MPYG Medium (Anaerobic) | 99.66 | 0.2  |
| IF3KA12009AB | ORS-AM05-491 | Oral- saliva     | Male   | Adult    | Blood-MPYG Medium (Anaerobic) | 99.57 | 0.2  |
| IF3KA13001   | ORS-TM06-24  | Oral- saliva     | Male   | Teenager | MPYG Medium (Aerobic)         | 99.9  | 0.15 |
| IF3KA13001B  | ORS-TM06-04  | Oral- saliva     | Male   | Teenager | Blood-MPYG Medium (Aerobic)   | 99.11 | 0    |
| IF3KA13002A  | ORS-TM06-104 | Oral- saliva     | Male   | Teenager | MPYG Medium (Anaerobic)       | 98.46 | 0    |
| IF3KA13002B  | ORS-TM06-05  | Oral- saliva     | Male   | Teenager | Blood-MPYG Medium (Aerobic)   | 99.88 | 0.18 |
| IF3KA13003A  | ORS-TM06-105 | Oral- saliva     | Male   | Teenager | MPYG Medium (Anaerobic)       | 99.07 | 0.2  |
| IF3KA13003B  | ORS-TM06-06  | Oral- saliva     | Male   | Teenager | Blood-MPYG Medium (Aerobic)   | 100   | 0    |
| IF3KA13004   | ORS-TM06-27  | Oral- saliva     | Male   | Teenager | MPYG Medium (Aerobic)         | 100   | 0    |
| IF3KA13004A  | ORS-TM06-106 | Oral- saliva     | Male   | Teenager | MPYG Medium (Anaerobic)       | 99.45 | 0.27 |
| IF3KA13004B  | ORS-TM06-07  | Oral- saliva     | Male   | Teenager | Blood-MPYG Medium (Aerobic)   | 100   | 0    |
| IF3KA13005A  | ORS-TM06-107 | Oral- saliva     | Male   | Teenager | MPYG Medium (Anaerobic)       | 100   | 0.47 |
| IF3KA13005B  | ORS-TM06-08  | Oral- saliva     | Male   | Teenager | Blood-MPYG Medium (Aerobic)   | 99.33 | 0    |
| IF3KA13007A  | ORS-TM06-109 | Oral- saliva     | Male   | Teenager | MPYG Medium (Anaerobic)       | 98.91 | 0.55 |
| IF3KA13008A  | ORS-TM06-110 | Oral- saliva     | Male   | Teenager | MPYG Medium (Anaerobic)       | 98.37 | 0    |
| IF3KA13016A  | ORS-TM06-231 | Oral- saliva     | Male   | Teenager | MPYG Medium (Anaerobic)       | 99.66 | 0.11 |
| IF3KA14004AB | ORS-TM07-51  | Oral- saliva     | Male   | Teenager | Blood-MPYG Medium (Anaerobic) | 99.46 | 0.23 |
| IF3KA14005A  | ORS-TM07-18  | Oral- saliva     | Male   | Teenager | MPYG Medium (Anaerobic)       | 99.66 | 0    |
| IF3KA14005AB | ORS-TM07-52  | Oral- saliva     | Male   | Teenager | Blood-MPYG Medium (Anaerobic) | 99.66 | 0    |
| IF3KA14005B  | ORS-TM07-240 | Oral- saliva     | Male   | Teenager | Blood-MPYG Medium (Aerobic)   | 99.87 | 0.24 |
| IF3KA14006A  | ORS-TM07-19  | Oral- saliva     | Male   | Teenager | MPYG Medium (Anaerobic)       | 100   | 0    |
| IF3KA14006B  | ORS-TM07-241 | Oral- saliva     | Male   | Teenager | Blood-MPYG Medium (Aerobic)   | 99.63 | 0.31 |
| IF3KA14008A  | ORS-TM07-21  | Oral- saliva     | Male   | Teenager | MPYG Medium (Anaerobic)       | 99.66 | 0.68 |
| IF3KA15001   | ORS-AM08-15  | Oral- saliva     | Male   | Adult    | MPYG Medium (Aerobic)         | 99.79 | 0.15 |
| IF3KA15001A  | ORS-AM08-32  | Oral- saliva     | Male   | Adult    | MPYG Medium (Anaerobic)       | 99.88 | 0    |
| IF3KA15001AB | ORS-AM08-59  | Oral- saliva     | Male   | Adult    | Blood-MPYG Medium (Anaerobic) | 99.88 | 0    |
| IF3KA15002A  | ORS-AM08-33  | Oral- saliva     | Male   | Adult    | MPYG Medium (Anaerobic)       | 100   | 0    |
| IF3KA15002AB | ORS-AM08-60  | Oral- saliva     | Male   | Adult    | Blood-MPYG Medium (Anaerobic) | 99.66 | 0.34 |
| IF3KA15003A  | ORS-AM08-34  | Oral- saliva     | Male   | Adult    | MPYG Medium (Anaerobic)       | 99.45 | 0.82 |
| IF3KA15006A  | ORS-AM08-153 | Oral- saliva     | Male   | Adult    | MPYG Medium (Anaerobic)       | 100   | 0.47 |
| IF3KA15007A  | ORS-AM08-154 | Oral- saliva     | Male   | Adult    | MPYG Medium (Anaerobic)       | 100   | 0.59 |
| IF3KA15007B  | ORS-AM08-119 | Oral- saliva     | Male   | Adult    | Blood-MPYG Medium (Aerobic)   | 95.75 | 4.72 |
| IF3KC09001   | ODP-AF04-87  | Oral-tooth       | Female | Adult    | MPYG Medium (Aerobic)         | 99.83 | 0.58 |
| IF3KC09001A  | ODP-AF04-161 | Oral-tooth       | Female | Adult    | MPYG Medium (Anaerobic)       | 99.45 | 0    |
| IF3KC09002   | ODP-AF04-88  | Oral-tooth       | Female | Adult    | MPYG Medium (Aerobic)         | 99.82 | 0.26 |
| IF3KC10005A  | ODP-AF05-77  | Oral-tooth       | Female | Adult    | MPYG Medium (Anaerobic)       | 99.9  | 1.08 |
| IF3KC12001AB | ODP-AM05-264 | Oral-tooth       | Male   | Adult    | Blood-MPYG Medium (Anaerobic) | 99.87 | 0.2  |
| IF3KC12001B  | ODP-AM05-72  | Oral-tooth       | Male   | Adult    | Blood-MPYG Medium (Aerobic)   | 99.84 | 0.15 |
| IF3KC12002   | ODP-AM05-34  | Oral-tooth       | Male   | Adult    | MPYG Medium (Aerobic)         | 99.65 | 0.12 |
| IF3KC12002AB | ODP-AM05-265 | Oral-tooth       | Male   | Adult    | Blood-MPYG Medium (Anaerobic) | 99.65 | 0.12 |
| IF3KC12002B  | ODP-AM05-73  | Oral-tooth       | Male   | Adult    | Blood-MPYG Medium (Aerobic)   | 100   | 0    |
| IF3KC12003AB | ODP-AM05-266 | Oral-tooth       | Male   | Adult    | Blood-MPYG Medium (Anaerobic) | 99    | 0    |

|               |              |                  |        |          |                               |       |      |
|---------------|--------------|------------------|--------|----------|-------------------------------|-------|------|
| IF3KC12004    | ODP-AM05-444 | Oral-tooth       | Male   | Adult    | MPYG Medium (Aerobic)         | 98.34 | 0    |
| IF3KC12004A   | ODP-AM05-243 | Oral-tooth       | Male   | Adult    | MPYG Medium (Anaerobic)       | 100   | 0.12 |
| IF3KC12004AB  | ODP-AM05-267 | Oral-tooth       | Male   | Adult    | Blood-MPYG Medium (Anaerobic) | 99.87 | 0.2  |
| IF3KC12006A   | ODP-AM05-503 | Oral-tooth       | Male   | Adult    | MPYG Medium (Anaerobic)       | 100   | 0    |
| IF3KC12006AB  | ODP-AM05-269 | Oral-tooth       | Male   | Adult    | Blood-MPYG Medium (Anaerobic) | 100   | 0.47 |
| IF3KC12007A   | ODP-AM05-533 | Oral-tooth       | Male   | Adult    | MPYG Medium (Anaerobic)       | 100   | 0.47 |
| IF3KC13001A   | ODP-TM06-159 | Oral-tooth       | Male   | Teenager | MPYG Medium (Anaerobic)       | 99.07 | 0.2  |
| IF3KC13003    | ODP-TM06-50  | Oral-tooth       | Male   | Teenager | MPYG Medium (Aerobic)         | 100   | 0    |
| IF3KC13006A   | ODP-TM06-164 | Oral-tooth       | Male   | Teenager | MPYG Medium (Anaerobic)       | 100   | 0    |
| IF3KC14001    | ODP-TM07-201 | Oral-tooth       | Male   | Teenager | MPYG Medium (Aerobic)         | 99.49 | 0.76 |
| IF3KC14001A   | ODP-TM07-131 | Oral-tooth       | Male   | Teenager | MPYG Medium (Anaerobic)       | 99.45 | 0    |
| IF3KC14001AB  | ODP-TM07-158 | Oral-tooth       | Male   | Teenager | Blood-MPYG Medium (Anaerobic) | 100   | 0    |
| IF3KC14002AB  | ODP-TM07-159 | Oral-tooth       | Male   | Teenager | Blood-MPYG Medium (Anaerobic) | 99.66 | 0    |
| IF3KC14004A   | ODP-TM07-134 | Oral-tooth       | Male   | Teenager | MPYG Medium (Anaerobic)       | 100   | 0    |
| IF3KC14005    | ODP-TM07-296 | Oral-tooth       | Male   | Teenager | MPYG Medium (Aerobic)         | 99.49 | 0.76 |
| IF3KC14005A   | ODP-TM07-173 | Oral-tooth       | Male   | Teenager | MPYG Medium (Anaerobic)       | 99.49 | 0.76 |
| IF3KC14005AB  | ODP-TM07-162 | Oral-tooth       | Male   | Teenager | Blood-MPYG Medium (Anaerobic) | 99.87 | 0.2  |
| IF3KC14006A   | ODP-TM07-271 | Oral-tooth       | Male   | Teenager | MPYG Medium (Anaerobic)       | 100   | 0    |
| IF3KC14007A   | ODP-TM07-272 | Oral-tooth       | Male   | Teenager | MPYG Medium (Anaerobic)       | 99.87 | 0.2  |
| IF3KC15002A   | ODP-AM08-308 | Oral-tooth       | Male   | Adult    | MPYG Medium (Anaerobic)       | 100   | 0    |
| IF3KC15003A   | ODP-AM08-396 | Oral-tooth       | Male   | Adult    | MPYG Medium (Anaerobic)       | 98.46 | 0    |
| IF3KC15005    | ODP-AM08-466 | Oral-tooth       | Male   | Adult    | MPYG Medium (Aerobic)         | 99.33 | 0    |
| IF3KC15005A   | ODP-AM08-398 | Oral-tooth       | Male   | Adult    | MPYG Medium (Anaerobic)       | 99.83 | 0.73 |
| IF3KC16001B   | ODP-AF06-62  | Oral-tooth       | Female | Adult    | Blood-MPYG Medium (Aerobic)   | 99.66 | 0    |
| IF3KC16002    | ODP-AF06-103 | Oral-tooth       | Female | Adult    | MPYG Medium (Aerobic)         | 99.45 | 0    |
| IF3KT08003    | ORT-AF03-214 | Oral-tongue coat | Female | Adult    | MPYG Medium (Aerobic)         | 100   | 0.17 |
| IF3KT08006BA  | ORT-AF03-21  | Oral-tongue coat | Female | Adult    | Blood-MPYG Medium (Anaerobic) | 99.96 | 0.97 |
| IF3KT09001    | ORT-AF04-16  | Oral-tongue coat | Female | Adult    | MPYG Medium (Aerobic)         | 100   | 0.11 |
| IF3KT09001A   | ORT-AF04-172 | Oral-tongue coat | Female | Adult    | MPYG Medium (Anaerobic)       | 100   | 0    |
| IF3KT09001BA  | ORT-AF04-123 | Oral-tongue coat | Female | Adult    | Blood-MPYG Medium (Anaerobic) | 100   | 0.47 |
| IF3KT09002    | ORT-AF04-193 | Oral-tongue coat | Female | Adult    | MPYG Medium (Aerobic)         | 99.83 | 0.58 |
| IF3KT09003A   | ORT-AF04-219 | Oral-tongue coat | Female | Adult    | MPYG Medium (Anaerobic)       | 100   | 0.07 |
| IF3KT09003BA  | ORT-AF04-125 | Oral-tongue coat | Female | Adult    | Blood-MPYG Medium (Anaerobic) | 100   | 0.47 |
| IF3KT10001A   | ORT-AF05-117 | Oral-tongue coat | Female | Adult    | MPYG Medium (Anaerobic)       | 99.63 | 0    |
| IF3KT10005A   | ORT-AF05-121 | Oral-tongue coat | Female | Adult    | MPYG Medium (Anaerobic)       | 99.45 | 0.27 |
| IF3KT11001A   | ORT-AM04-57  | Oral-tongue coat | Male   | Adult    | MPYG Medium (Anaerobic)       | 99.9  | 0.58 |
| IF3KT11003A   | ORT-AM04-59  | Oral-tongue coat | Male   | Adult    | MPYG Medium (Anaerobic)       | 99.87 | 1.26 |
| IF3KT12001    | ORT-AM05-07  | Oral-tongue coat | Male   | Adult    | MPYG Medium (Aerobic)         | 99.84 | 0.15 |
| IF3KT12002AB  | ORT-AM05-499 | Oral-tongue coat | Male   | Adult    | Blood-MPYG Medium (Anaerobic) | 99.66 | 0.2  |
| IF3KT12003A   | ORT-AM05-281 | Oral-tongue coat | Male   | Adult    | MPYG Medium (Anaerobic)       | 99.32 | 0    |
| IF3KT12003ABC | ORT-AM05-525 | Oral-tongue coat | Male   | Adult    | Blood-MPYG Medium (Anaerobic) | 99.87 | 0.2  |
| IF3KT12004A   | ORT-AM05-282 | Oral-tongue coat | Male   | Adult    | MPYG Medium (Anaerobic)       | 99.87 | 0.2  |
| IF3KT12004ABC | ORT-AM05-527 | Oral-tongue coat | Male   | Adult    | Blood-MPYG Medium (Anaerobic) | 99.87 | 0.2  |
| IF3KT12009A   | ORT-AM05-511 | Oral-tongue coat | Male   | Adult    | MPYG Medium (Anaerobic)       | 99    | 0.09 |
| IF3KT12009AC  | ORT-AM05-512 | Oral-tongue coat | Male   | Adult    | MPYG Medium (Anaerobic)       | 99    | 0.09 |
| IF3KT13002A   | ORT-TM06-179 | Oral-tongue coat | Male   | Teenager | MPYG Medium (Anaerobic)       | 99.9  | 0.15 |
| IF3KT13004A   | ORT-TM06-181 | Oral-tongue coat | Male   | Teenager | MPYG Medium (Anaerobic)       | 100   | 0    |
| IF3KT13004B   | ORT-TM06-80  | Oral-tongue coat | Male   | Teenager | Blood-MPYG Medium (Aerobic)   | 99.11 | 0    |
| IF3KT13012A   | ORT-TM06-189 | Oral-tongue coat | Male   | Teenager | MPYG Medium (Anaerobic)       | 100   | 0    |
| IF3KT14001    | ORT-TM07-187 | Oral-tongue coat | Male   | Teenager | MPYG Medium (Aerobic)         | 99.49 | 0.76 |
| IF3KT14001A   | ORT-TM07-84  | Oral-tongue coat | Male   | Teenager | MPYG Medium (Anaerobic)       | 99.9  | 0.15 |
| IF3KT14001AB  | ORT-TM07-100 | Oral-tongue coat | Male   | Teenager | Blood-MPYG Medium (Anaerobic) | 99.46 | 0.23 |
| IF3KT14002AB  | ORT-TM07-101 | Oral-tongue coat | Male   | Teenager | Blood-MPYG Medium (Anaerobic) | 100   | 0.47 |
| IF3KT14003AB  | ORT-TM07-102 | Oral-tongue coat | Male   | Teenager | Blood-MPYG Medium (Anaerobic) | 99.05 | 4.07 |
| IF3KT14004A   | ORT-TM07-87  | Oral-tongue coat | Male   | Teenager | MPYG Medium (Anaerobic)       | 100   | 0.34 |
| IF3KT14006A   | ORT-TM07-89  | Oral-tongue coat | Male   | Teenager | MPYG Medium (Anaerobic)       | 99.32 | 0.17 |
| IF3KT14007A   | ORT-TM07-90  | Oral-tongue coat | Male   | Teenager | MPYG Medium (Anaerobic)       | 100   | 0    |
| IF3KT14008A   | ORT-TM07-91  | Oral-tongue coat | Male   | Teenager | MPYG Medium (Anaerobic)       | 100   | 0.34 |
| IF3KT14008AB  | ORT-TM07-107 | Oral-tongue coat | Male   | Teenager | Blood-MPYG Medium (Anaerobic) | 99.66 | 0    |
| IF3KT14009AB  | ORT-TM07-108 | Oral-tongue coat | Male   | Teenager | Blood-MPYG Medium (Anaerobic) | 100   | 0.34 |
| IF3KT15001    | ORT-AM08-202 | Oral-tongue coat | Male   | Adult    | MPYG Medium (Aerobic)         | 99.79 | 0.15 |
| IF3KT15002B   | ORT-AM08-226 | Oral-tongue coat | Male   | Adult    | Blood-MPYG Medium (Aerobic)   | 99.34 | 0    |
| IF3KT15004    | ODP-AM08-337 | Oral-tooth       | Male   | Adult    | MPYG Medium (Aerobic)         | 98.56 | 0    |
| IF3KT15004A   | ORT-AM08-425 | Oral-tongue coat | Male   | Adult    | MPYG Medium (Anaerobic)       | 99.88 | 0    |
| IF3KT15006    | ORT-AM08-480 | Oral-tongue coat | Male   | Adult    | MPYG Medium (Aerobic)         | 99.33 | 0    |
| IF3KT15007A   | ORT-AM08-428 | Oral-tongue coat | Male   | Adult    | MPYG Medium (Anaerobic)       | 100   | 0.59 |
| IF3KT15008AB  | ORT-AM08-458 | Oral-tongue coat | Male   | Adult    | Blood-MPYG Medium (Anaerobic) | 99.45 | 0.77 |
| IF3KT15013A   | ORT-AM08-434 | Oral-tongue coat | Male   | Adult    | MPYG Medium (Anaerobic)       | 100   | 0.17 |
| IF3KT16001B   | ORT-AF06-28  | Oral-tongue coat | Female | Adult    | Blood-MPYG Medium (Aerobic)   | 100   | 0.76 |
| IF3KT16003B   | ORT-AF06-30  | Oral-tongue coat | Female | Adult    | Blood-MPYG Medium (Aerobic)   | 99.66 | 0.17 |
| IF3KT16004    | ORT-AF06-10  | Oral-tongue coat | Female | Adult    | MPYG Medium (Aerobic)         | 99.49 | 0.76 |
| IF3KT16005    | ORT-AF06-36  | Oral-tongue coat | Female | Adult    | MPYG Medium (Aerobic)         | 100   | 0    |
| JF3KA10001A   | ORS-AF05-30  | Oral- saliva     | Female | Adult    | J Medium (Anaerobic)          | 99.46 | 0    |
| JF3KA12003    | ORS-AM05-138 | Oral- saliva     | Male   | Adult    | J Medium (Aerobic)            | 99.87 | 0.7  |
| JF3KA12004B   | ORS-AM05-334 | Oral- saliva     | Male   | Adult    | Blood-J Medium (Aerobic)      | 99.96 | 0.49 |
| JF3KA12006AB  | ORS-AM05-362 | Oral- saliva     | Male   | Adult    | Blood-J Medium (Anaerobic)    | 100   | 0.56 |
| JF3KA12006B   | ORS-AM05-474 | Oral- saliva     | Male   | Adult    | J Medium (Aerobic)            | 99.33 | 0    |
| JF3KA12007AB  | ORS-AM05-363 | Oral- saliva     | Male   | Adult    | Blood-J Medium (Anaerobic)    | 99.25 | 0.12 |
| JF3KA13004    | ORS-TM06-31  | Oral- saliva     | Male   | Teenager | J Medium (Aerobic)            | 99.34 | 0    |
| JF3KA14001AB  | ORS-TM07-54  | Oral- saliva     | Male   | Teenager | Blood-J Medium (Anaerobic)    | 99.63 | 0.37 |
| JF3KA15002AB  | ORS-AM08-63  | Oral- saliva     | Male   | Adult    | Blood-J Medium (Anaerobic)    | 99.62 | 0.29 |
| JF3KC08001A   | ODP-AF03-102 | Oral-tooth       | Female | Adult    | J Medium (Anaerobic)          | 99.87 | 0.2  |
| JF3KC09001    | ODP-AF04-91  | Oral-tooth       | Female | Adult    | J Medium (Aerobic)            | 99.9  | 1.08 |
| JF3KC09004    | ODP-AF04-94  | Oral-tooth       | Female | Adult    | J Medium (Aerobic)            | 99.82 | 0.26 |
| JF3KC11001    | ODP-AM04-107 | Oral-tooth       | Male   | Adult    | J Medium (Aerobic)            | 99.9  | 0.58 |
| JF3KC12001A   | ODP-AM05-244 | Oral-tooth       | Male   | Adult    | J Medium (Anaerobic)          | 99.65 | 0.12 |

|              |              |                  |        |          |                              |       |      |
|--------------|--------------|------------------|--------|----------|------------------------------|-------|------|
| JF3KC12002AB | ODP-AM05-271 | Oral-tooth       | Male   | Adult    | Blood-J Medium (Anaerobic)   | 99.45 | 0    |
| JF3KC12002B  | ODP-AM05-303 | Oral-tooth       | Male   | Adult    | Blood-J Medium (Aerobic)     | 99.67 | 0.23 |
| JF3KC12003AB | ODP-AM05-272 | Oral-tooth       | Male   | Adult    | Blood-J Medium (Anaerobic)   | 99.45 | 0    |
| JF3KC12004AB | ODP-AM05-391 | Oral-tooth       | Male   | Adult    | Blood-J Medium (Anaerobic)   | 100   | 0.95 |
| JF3KC12005A  | ODP-AM05-504 | Oral-tooth       | Male   | Adult    | J Medium (Anaerobic)         | 99.82 | 0.6  |
| JF3KC14002B  | ODP-TM07-321 | Oral-tooth       | Male   | Teenager | Blood-J Medium (Aerobic)     | 99.49 | 0.76 |
| JF3KC16002   | ODP-AF06-99  | Oral-tooth       | Female | Adult    | J Medium (Aerobic)           | 99.42 | 0.2  |
| JF3KC16004   | ODP-AF06-105 | Oral-tooth       | Female | Adult    | J Medium (Aerobic)           | 99.49 | 0.76 |
| JF3KT08002A  | ORT-AF03-133 | Oral-tongue coat | Female | Adult    | J Medium (Anaerobic)         | 100   | 0.56 |
| JF3KT08002BA | ORT-AF03-24  | Oral-tongue coat | Female | Adult    | Blood-J Medium (Anaerobic)   | 99.61 | 1.56 |
| JF3KT09001A  | ORT-AF04-174 | Oral-tongue coat | Female | Adult    | J Medium (Anaerobic)         | 100   | 0.47 |
| JF3KT09003   | ORT-AF04-19  | Oral-tongue coat | Female | Adult    | J Medium (Aerobic)           | 99.76 | 0.83 |
| JF3KT09003A  | ORT-AF04-225 | Oral-tongue coat | Female | Adult    | J Medium (Anaerobic)         | 100   | 0.47 |
| JF3KT10001   | ORT-AF05-174 | Oral-tongue coat | Female | Adult    | J Medium (Aerobic)           | 99.11 | 0    |
| JF3KT10001A  | ORT-AF05-123 | Oral-tongue coat | Female | Adult    | J Medium (Anaerobic)         | 99.63 | 0    |
| JF3KT12003B  | ORT-AM05-319 | Oral-tongue coat | Male   | Adult    | Blood-J Medium (Aerobic)     | 99.97 | 0.71 |
| JF3KT12005AB | ORT-AM05-529 | Oral-tongue coat | Male   | Adult    | Blood-J Medium (Anaerobic)   | 100   | 0.73 |
| JF3KT12007A  | ORT-AM05-514 | Oral-tongue coat | Male   | Adult    | J Medium (Anaerobic)         | 99.4  | 0.58 |
| JF3KT14002   | ORT-TM07-192 | Oral-tongue coat | Male   | Teenager | J Medium (Aerobic)           | 99.33 | 0    |
| JF3KT15001   | ORT-AM08-205 | Oral-tongue coat | Male   | Adult    | J Medium (Aerobic)           | 99.33 | 0    |
| JF3KT15001A  | ORT-AM08-438 | Oral-tongue coat | Male   | Adult    | J Medium (Anaerobic)         | 99.46 | 0.15 |
| JF3KT15002   | ORT-AM08-206 | Oral-tongue coat | Male   | Adult    | J Medium (Aerobic)           | 99.66 | 0.42 |
| JF3KT15002B  | ODP-AM08-363 | Oral-tooth       | Male   | Adult    | Blood-J Medium (Aerobic)     | 99.33 | 0    |
| MF3KA09001A  | ORS-AF04-142 | Oral- saliva     | Female | Adult    | MRS Medium (Anaerobic)       | 99.87 | 1.26 |
| MF3KA09002A  | ORS-AF04-143 | Oral- saliva     | Female | Adult    | MRS Medium (Anaerobic)       | 100   | 0.34 |
| MF3KA09005A  | ORS-AF04-236 | Oral- saliva     | Female | Adult    | MRS Medium (Anaerobic)       | 100   | 0    |
| MF3KA11001   | ORS-AM04-111 | Oral- saliva     | Male   | Adult    | MRS Medium (Aerobic)         | 99.45 | 0.27 |
| MF3KA11001A  | ORS-AM04-88  | Oral- saliva     | Male   | Adult    | MRS Medium (Anaerobic)       | 100   | 0.47 |
| MF3KA11003A  | ORS-AM04-90  | Oral- saliva     | Male   | Adult    | MRS Medium (Anaerobic)       | 100   | 0    |
| MF3KA12001B  | ORS-AM05-336 | Oral- saliva     | Male   | Adult    | Blood-J Medium (Anaerobic)   | 99.38 | 1.14 |
| MF3KA12002   | ORS-AM05-140 | Oral- saliva     | Male   | Adult    | MRS Medium (Aerobic)         | 100   | 0.34 |
| MF3KA12002AB | ORS-AM05-205 | Oral- saliva     | Male   | Adult    | Blood-MRS Medium (Anaerobic) | 100   | 0.71 |
| MF3KA12002B  | ORS-AM05-475 | Oral- saliva     | Male   | Adult    | MRS Medium (Aerobic)         | 98.95 | 0    |
| MF3KA12003AB | ORS-AM05-364 | Oral- saliva     | Male   | Adult    | Blood-MRS Medium (Anaerobic) | 100   | 0.48 |
| MF3KA12004AB | ORS-AM05-365 | Oral- saliva     | Male   | Adult    | Blood-MRS Medium (Anaerobic) | 99.32 | 0.17 |
| MF3KA12007AB | ORS-AM05-494 | Oral- saliva     | Male   | Adult    | Blood-MRS Medium (Anaerobic) | 99.94 | 0.28 |
| MF3KA12008AB | ORS-AM05-495 | Oral- saliva     | Male   | Adult    | Blood-MRS Medium (Anaerobic) | 99    | 0    |
| MF3KA13001A  | ORS-TM06-111 | Oral- saliva     | Male   | Teenager | MRS Medium (Anaerobic)       | 99.53 | 0.09 |
| MF3KA13001AB | ORS-TM06-118 | Oral- saliva     | Male   | Teenager | Blood-MRS Medium (Anaerobic) | 99.53 | 0.09 |
| MF3KA13002A  | ORS-TM06-112 | Oral- saliva     | Male   | Teenager | MRS Medium (Anaerobic)       | 100   | 0.76 |
| MF3KA13003A  | ORS-TM06-113 | Oral- saliva     | Male   | Teenager | MRS Medium (Anaerobic)       | 99.62 | 0    |
| MF3KA13004A  | ORS-TM06-114 | Oral- saliva     | Male   | Teenager | MRS Medium (Anaerobic)       | 98.37 | 0    |
| MF3KA13014A  | ORS-TM06-235 | Oral- saliva     | Male   | Teenager | MRS Medium (Anaerobic)       | 100   | 0    |
| MF3KA14001   | ORS-TM07-224 | Oral- saliva     | Male   | Teenager | MRS Medium (Aerobic)         | 99.46 | 0.23 |
| MF3KA14002   | ORS-TM07-225 | Oral- saliva     | Male   | Teenager | MRS Medium (Aerobic)         | 99.82 | 0.2  |
| MF3KA14006B  | ORS-TM07-255 | Oral- saliva     | Male   | Teenager | Blood-MRS Medium (Aerobic)   | 98.91 | 0.55 |
| MF3KA15001AB | ORS-AM08-69  | Oral- saliva     | Male   | Adult    | Blood-MRS Medium (Anaerobic) | 99.45 | 0.82 |
| MF3KA15005B  | ORS-AM08-136 | Oral- saliva     | Male   | Adult    | Blood-MRS Medium (Aerobic)   | 99.33 | 0    |
| MF3KC09001   | ODP-AF04-99  | Oral-tooth       | Female | Adult    | MRS Medium (Aerobic)         | 99.9  | 1.08 |
| MF3KC09001B  | ODP-AF04-114 | Oral-tooth       | Female | Adult    | Blood-BHI (Aerobic)          | 99.46 | 0    |
| MF3KC09002A  | ODP-AF04-250 | Oral-tooth       | Female | Adult    | MRS Medium (Anaerobic)       | 99.88 | 0    |
| MF3KC11001A  | ODP-AM04-44  | Oral-tooth       | Male   | Adult    | MRS Medium (Anaerobic)       | 99.84 | 0.58 |
| MF3KC11002A  | ODP-AM04-45  | Oral-tooth       | Male   | Adult    | MRS Medium (Anaerobic)       | 100   | 0.37 |
| MF3KC12001A  | ODP-AM05-247 | Oral-tooth       | Male   | Adult    | MRS Medium (Anaerobic)       | 100   | 0.12 |
| MF3KC12001AB | ODP-AM05-273 | Oral-tooth       | Male   | Adult    | Blood-MRS Medium (Anaerobic) | 99.65 | 0.12 |
| MF3KC12001B  | ODP-AM05-76  | Oral-tooth       | Male   | Adult    | Blood-MRS Medium (Aerobic)   | 99.34 | 0    |
| MF3KC12002A  | ODP-AM05-248 | Oral-tooth       | Male   | Adult    | MRS Medium (Anaerobic)       | 99.65 | 0.12 |
| MF3KC12002AB | ODP-AM05-535 | Oral-tooth       | Male   | Adult    | Blood-MRS Medium (Anaerobic) | 99.87 | 0.2  |
| MF3KC12003   | ODP-AM05-41  | Oral-tooth       | Male   | Adult    | MRS Medium (Aerobic)         | 99.65 | 0.12 |
| MF3KC12003A  | ODP-AM05-249 | Oral-tooth       | Male   | Adult    | MRS Medium (Anaerobic)       | 99.45 | 0    |
| MF3KC12003B  | ODP-AM05-78  | Oral-tooth       | Male   | Adult    | Blood-MRS Medium (Aerobic)   | 100   | 0    |
| MF3KC12004A  | ODP-AM05-429 | Oral-tooth       | Male   | Adult    | MRS Medium (Anaerobic)       | 99.84 | 0.15 |
| MF3KC12006B  | ODP-AM05-440 | Oral-tooth       | Male   | Adult    | Blood-MRS Medium (Aerobic)   | 99.78 | 0    |
| MF3KC13003   | ODP-TM06-55  | Oral-tooth       | Male   | Teenager | MRS Medium (Aerobic)         | 100   | 0    |
| MF3KC15001A  | ODP-AM08-309 | Oral-tooth       | Male   | Adult    | MRS Medium (Anaerobic)       | 100   | 0    |
| MF3KC15002A  | ODP-AM08-310 | Oral-tooth       | Male   | Adult    | MRS Medium (Anaerobic)       | 99.45 | 0    |
| MF3KC15010AB | ODP-AM08-335 | Oral-tooth       | Male   | Adult    | Blood-MRS Medium (Anaerobic) | 99.45 | 0    |
| MF3KT08001   | ORT-AF03-215 | Oral-tongue coat | Female | Adult    | MRS Medium (Aerobic)         | 99.96 | 0.76 |
| MF3KT08001A  | ORT-AF03-01  | Oral-tongue coat | Female | Adult    | MRS Medium (Anaerobic)       | 100   | 0    |
| MF3KT08004A  | ORT-AF03-04  | Oral-tongue coat | Female | Adult    | MRS Medium (Anaerobic)       | 100   | 0    |
| MF3KT08008A  | ORT-AF03-08  | Oral-tongue coat | Female | Adult    | MRS Medium (Anaerobic)       | 100   | 0.08 |
| MF3KT09001   | ORT-AF04-23  | Oral-tongue coat | Female | Adult    | MRS Medium (Aerobic)         | 99.83 | 0.58 |
| MF3KT09001A  | ORT-AF04-222 | Oral-tongue coat | Female | Adult    | MRS Medium (Anaerobic)       | 100   | 0    |
| MF3KT09003A  | ORT-AF04-247 | Oral-tongue coat | Female | Adult    | MRS Medium (Anaerobic)       | 99.32 | 0.42 |
| MF3KT10001A  | ORT-AF05-128 | Oral-tongue coat | Female | Adult    | MRS Medium (Anaerobic)       | 99.63 | 0    |
| MF3KT10005A  | ORT-AF05-132 | Oral-tongue coat | Female | Adult    | MRS Medium (Anaerobic)       | 100   | 0    |
| MF3KT10008A  | ORT-AF05-232 | Oral-tongue coat | Female | Adult    | MRS Medium (Anaerobic)       | 100   | 0.47 |
| MF3KT11002A  | ORT-AM04-65  | Oral-tongue coat | Male   | Adult    | MRS Medium (Anaerobic)       | 99.83 | 0.58 |
| MF3KT12001A  | ORT-AM05-287 | Oral-tongue coat | Male   | Adult    | MRS Medium (Anaerobic)       | 99.87 | 0.3  |
| MF3KT12001AB | ORT-AM05-101 | Oral-tongue coat | Male   | Adult    | Blood-MRS Medium (Anaerobic) | 99.45 | 0.46 |
| MF3KT12002A  | ORT-AM05-515 | Oral-tongue coat | Male   | Adult    | MRS Medium (Anaerobic)       | 99.9  | 0.15 |
| MF3KT12002AB | ORT-AM05-102 | Oral-tongue coat | Male   | Adult    | Blood-MRS Medium (Anaerobic) | 99.87 | 0.3  |
| MF3KT12003A  | ORT-AM05-521 | Oral-tongue coat | Male   | Adult    | MRS Medium (Anaerobic)       | 99.87 | 0.2  |
| MF3KT12004AB | ORT-AM05-104 | Oral-tongue coat | Male   | Adult    | Blood-MRS Medium (Anaerobic) | 99.87 | 0.3  |
| MF3KT12004B  | ORT-AM05-63  | Oral-tongue coat | Male   | Adult    | Blood-MRS Medium (Aerobic)   | 99.4  | 0.68 |
| MF3KT12008B  | ORT-AM05-310 | Oral-tongue coat | Male   | Adult    | Blood-MRS Medium (Aerobic)   | 99.33 | 0    |

|                |                |                  |        |          |                                |       |      |
|----------------|----------------|------------------|--------|----------|--------------------------------|-------|------|
| MF3KT13001A    | ORT-TM06-193   | Oral-tongue coat | Male   | Teenager | MRS Medium (Anaerobic)         | 99.32 | 0.4  |
| MF3KT13002A    | ORT-TM06-194   | Oral-tongue coat | Male   | Teenager | MRS Medium (Anaerobic)         | 99.66 | 0.17 |
| MF3KT13003A    | ORT-TM06-195   | Oral-tongue coat | Male   | Teenager | MRS Medium (Anaerobic)         | 100   | 0    |
| MF3KT13008A    | ORT-TM06-200   | Oral-tongue coat | Male   | Teenager | MRS Medium (Anaerobic)         | 98.56 | 0    |
| MF3KT13011A    | ORT-TM06-203   | Oral-tongue coat | Male   | Teenager | MRS Medium (Anaerobic)         | 100   | 0.51 |
| MF3KT14001B    | ORT-TM07-207   | Oral-tongue coat | Male   | Teenager | Blood-MRS Medium (Aerobic)     | 99.46 | 0.23 |
| MF3KT15001A    | ORT-AM08-450   | Oral-tongue coat | Male   | Adult    | MRS Medium (Anaerobic)         | 99.88 | 0    |
| MF3KT15001AB   | ORT-AM08-463   | Oral-tongue coat | Male   | Adult    | Blood-MRS Medium (Anaerobic)   | 99.88 | 0    |
| MF3KT15001B    | ORT-AM08-229   | Oral-tongue coat | Male   | Adult    | Blood-MRS Medium (Aerobic)     | 100   | 0    |
| MF3KT15004     | ORT-AM08-210   | Oral-tongue coat | Male   | Adult    | MRS Medium (Aerobic)           | 100   | 0    |
| MF3KT16001     | ORT-AF06-11    | Oral-tongue coat | Female | Adult    | MRS Medium (Aerobic)           | 99.49 | 0.76 |
| MF3KT16003B    | ORT-AF06-97    | Oral-tongue coat | Female | Adult    | Blood-MRS Medium (Aerobic)     | 99.33 | 0    |
| ODP-AM01-02BB  | ODP-AM01-02BB  | Oral-tooth       | Male   | Adult    | Blood-BHI (Anaerobic)          | 99.87 | 0.2  |
| ODP-AM01-02O   | ODP-AM01-02O   | Oral-tooth       | Male   | Adult    | MPYG Medium (Aerobic)          | 99.92 | 0.23 |
| ODP-AM01-04    | ODP-AM01-04    | Oral-tooth       | Male   | Adult    | MPYG Medium (Anaerobic)        | 99.63 | 0.75 |
| ODP-AM01-04MBO | ODP-AM01-04MBO | Oral-tooth       | Male   | Adult    | MRS Medium (Aerobic)           | 99.56 | 0.15 |
| ODP-AM01-05    | ODP-AM01-05    | Oral-tooth       | Male   | Adult    | MPYG Medium (Anaerobic)        | 98.56 | 0    |
| ODP-AM01-05BB  | ODP-AM01-05BB  | Oral-tooth       | Male   | Adult    | Blood-BHI (Anaerobic)          | 100   | 0.47 |
| ODP-AM01-06    | ODP-AM01-06    | Oral-tooth       | Male   | Adult    | MPYG Medium (Anaerobic)        | 100   | 0    |
| ODP-AM01-08    | ODP-AM01-08    | Oral-tooth       | Male   | Adult    | MPYG Medium (Anaerobic)        | 99.87 | 0.2  |
| ODP-AM01-10    | ODP-AM01-10    | Oral-tooth       | Male   | Adult    | MPYG Medium (Anaerobic)        | 98.88 | 0    |
| ORS-AM01-01    | ORS-AM01-01    | Oral- saliva     | Male   | Adult    | MPYG Medium (Anaerobic)        | 99.56 | 2.33 |
| ORS-AM01-01BB  | ORS-AM01-01BB  | Oral- saliva     | Male   | Adult    | Blood-BHI (Anaerobic)          | 100   | 0.47 |
| ORS-AM01-01O   | ORS-AM01-01O   | Oral- saliva     | Male   | Adult    | MPYG Medium (Aerobic)          | 99.92 | 0.45 |
| ORS-AM01-02    | ORS-AM01-02    | Oral- saliva     | Male   | Adult    | MPYG Medium (Anaerobic)        | 100   | 0.56 |
| ORS-AM01-02BB  | ORS-AM01-02BB  | Oral- saliva     | Male   | Adult    | Blood-BHI (Anaerobic)          | 99.66 | 0.07 |
| ORS-AM01-02BBO | ORS-AM01-02BBO | Oral- saliva     | Male   | Adult    | MRS Medium (Aerobic)           | 100   | 0.47 |
| ORS-AM01-02MB  | ORS-AM01-02MB  | Oral- saliva     | Male   | Adult    | MRS Medium (Anaerobic)         | 100   | 0.37 |
| ORS-AM01-03BB  | ORS-AM01-03BB  | Oral- saliva     | Male   | Adult    | Blood-BHI (Anaerobic)          | 99.66 | 0.11 |
| ORS-AM01-04BBO | ORS-AM01-04BBO | Oral- saliva     | Male   | Adult    | Blood-BHI (Aerobic)            | 99.64 | 0.11 |
| ORS-AM01-04MB  | ORS-AM01-04MB  | Oral- saliva     | Male   | Adult    | MRS Medium (Anaerobic)         | 99    | 0    |
| ORS-AM01-13TBO | ORS-AM01-13TBO | Oral- saliva     | Male   | Adult    | TSB Medium (Aerobic)           | 99.92 | 0    |
| ORT-AM01-01TBO | ORT-AM01-01TBO | Oral-tongue coat | Male   | Adult    | TSB Medium (Aerobic)           | 99.01 | 0.81 |
| ORT-AM01-02    | ORT-AM01-02    | Oral-tongue coat | Male   | Adult    | MPYG Medium (Anaerobic)        | 96.5  | 0    |
| ORT-AM01-03O   | ORT-AM01-03O   | Oral-tongue coat | Male   | Adult    | MPYG Medium (Aerobic)          | 99.33 | 0    |
| ORT-AM01-05MB  | ORT-AM01-05MB  | Oral-tongue coat | Male   | Adult    | MRS Medium (Anaerobic)         | 99    | 0    |
| ORT-AM01-06O   | ORT-AM01-06O   | Oral-tongue coat | Male   | Adult    | MPYG Medium (Aerobic)          | 99.45 | 0.27 |
| ORT-AM01-08MB  | ORT-AM01-08MB  | Oral-tongue coat | Male   | Adult    | MRS Medium (Anaerobic)         | 100   | 0    |
| ORT-AM01-12O   | ORT-AM01-12O   | Oral-tongue coat | Male   | Adult    | MPYG Medium (Aerobic)          | 99.43 | 0.03 |
| PF3KA08003A    | ORS-AF03-153   | Oral- saliva     | Female | Adult    | Spore Medium (Anaerobic)       | 99.61 | 1.56 |
| PF3KA08005A    | ORS-AF03-155   | Oral- saliva     | Female | Adult    | Spore Medium (Anaerobic)       | 99.82 | 0.24 |
| PF3KA09001A    | ORS-AF04-146   | Oral- saliva     | Female | Adult    | Spore Medium (Anaerobic)       | 99.83 | 0.58 |
| PF3KA10004A    | ORS-AF05-45    | Oral- saliva     | Female | Adult    | Spore Medium (Anaerobic)       | 100   | 0    |
| PF3KA11001A    | ORS-AM04-42    | Oral- saliva     | Male   | Adult    | Spore Medium (Anaerobic)       | 100   | 0.47 |
| PF3KA12001     | ORS-AM05-141   | Oral- saliva     | Male   | Adult    | Spore Medium (Aerobic)         | 99.87 | 0.3  |
| PF3KA12002AB   | ORS-AM05-207   | Oral- saliva     | Male   | Adult    | Blood-Spore Medium (Anaerobic) | 100   | 0    |
| PF3KA12003AB   | ORS-AM05-208   | Oral- saliva     | Male   | Adult    | Blood-Spore Medium (Anaerobic) | 100   | 1.69 |
| PF3KA12005B    | ORS-AM05-477   | Oral- saliva     | Male   | Adult    | Spore Medium (Aerobic)         | 99.33 | 0    |
| PF3KA12007     | ORS-AM05-147   | Oral- saliva     | Male   | Adult    | Spore Medium (Aerobic)         | 99.34 | 0    |
| PF3KA13002     | ORS-TM06-36    | Oral- saliva     | Male   | Teenager | Spore Medium (Aerobic)         | 99.87 | 0.2  |
| PF3KA13004B    | ORS-TM06-246   | Oral- saliva     | Male   | Teenager | Blood-Spore Medium (Aerobic)   | 99.34 | 0    |
| PF3KA14002     | ORS-TM07-227   | Oral- saliva     | Male   | Teenager | Spore Medium (Aerobic)         | 99.87 | 0.27 |
| PF3KA14002AB   | ORS-TM07-61    | Oral- saliva     | Male   | Teenager | Blood-Spore Medium (Anaerobic) | 99.46 | 0.23 |
| PF3KA14003B    | ORS-TM07-262   | Oral- saliva     | Male   | Teenager | Blood-Spore Medium (Aerobic)   | 99.49 | 0.76 |
| PF3KA14005AB   | ORS-TM07-64    | Oral- saliva     | Male   | Teenager | Blood-Spore Medium (Anaerobic) | 100   | 0.59 |
| PF3KA14007AB   | ORS-TM07-66    | Oral- saliva     | Male   | Teenager | Blood-Spore Medium (Anaerobic) | 100   | 0.59 |
| PF3KA14014AB   | ORS-TM07-73    | Oral- saliva     | Male   | Teenager | Blood-Spore Medium (Anaerobic) | 99.63 | 0    |
| PF3KA15001A    | ORS-AM08-42    | Oral- saliva     | Male   | Adult    | Spore Medium (Anaerobic)       | 100   | 0.45 |
| PF3KA15002A    | ORS-AM08-43    | Oral- saliva     | Male   | Adult    | Spore Medium (Anaerobic)       | 100   | 0    |
| PF3KA15003A    | ORS-AM08-44    | Oral- saliva     | Male   | Adult    | Spore Medium (Anaerobic)       | 99.45 | 0    |
| PF3KA15006AB   | ORS-AM08-178   | Oral- saliva     | Male   | Adult    | Blood-Spore Medium (Anaerobic) | 100   | 0.47 |
| PF3KC08001A    | ODP-AF03-106   | Oral-tooth       | Female | Adult    | Spore Medium (Anaerobic)       | 99.63 | 0    |
| PF3KC08007BA   | ODP-AF03-248   | Oral-tooth       | Female | Adult    | Blood-Spore Medium (Anaerobic) | 99.59 | 0    |
| PF3KC09001     | ODP-AF04-102   | Oral-tooth       | Female | Adult    | Spore Medium (Aerobic)         | 99.83 | 0.58 |
| PF3KC09001A    | ODP-AF04-243   | Oral-tooth       | Female | Adult    | Spore Medium (Anaerobic)       | 100   | 0    |
| PF3KC09002     | ODP-AF04-103   | Oral-tooth       | Female | Adult    | Spore Medium (Aerobic)         | 99.9  | 1.08 |
| PF3KC09002A    | ODP-AF04-244   | Oral-tooth       | Female | Adult    | Spore Medium (Anaerobic)       | 99.45 | 0    |
| PF3KC09004     | ODP-AF04-105   | Oral-tooth       | Female | Adult    | Spore Medium (Aerobic)         | 98.28 | 0.14 |
| PF3KC09005     | ODP-AF04-106   | Oral-tooth       | Female | Adult    | Spore Medium (Aerobic)         | 99.83 | 0.58 |
| PF3KC10001A    | ODP-AF05-85    | Oral-tooth       | Female | Adult    | Spore Medium (Anaerobic)       | 100   | 0.47 |
| PF3KC11001A    | ODP-AM04-46    | Oral-tooth       | Male   | Adult    | Spore Medium (Anaerobic)       | 99.9  | 0.58 |
| PF3KC12001     | ODP-AM05-43    | Oral-tooth       | Male   | Adult    | Spore Medium (Aerobic)         | 99.34 | 0    |
| PF3KC12001B    | ODP-AM05-80    | Oral-tooth       | Male   | Adult    | Blood-Spore Medium (Aerobic)   | 99.87 | 0.46 |
| PF3KC12002A    | ODP-AM05-432   | Oral-tooth       | Male   | Adult    | Spore Medium (Anaerobic)       | 100   | 0    |
| PF3KC12003B    | ODP-AM05-115   | Oral-tooth       | Male   | Adult    | Blood-Spore Medium (Aerobic)   | 99.33 | 0    |
| PF3KC12004A    | ODP-AM05-434   | Oral-tooth       | Male   | Adult    | Spore Medium (Anaerobic)       | 100   | 0    |
| PF3KC12005A    | ODP-AM05-506   | Oral-tooth       | Male   | Adult    | Spore Medium (Anaerobic)       | 99.82 | 0.54 |
| PF3KC15001B    | ODP-AM08-275   | Oral-tooth       | Male   | Adult    | Blood-Spore Medium (Aerobic)   | 95.35 | 0.97 |
| PF3KC16003     | ODP-AF06-153   | Oral-tooth       | Female | Adult    | Spore Medium (Aerobic)         | 99.49 | 0.76 |
| PF3KT08008BA   | ORT-AF03-41    | Oral-tongue coat | Female | Adult    | Blood-Spore Medium (Anaerobic) | 100   | 0.47 |
| PF3KT09001     | ORT-AF04-26    | Oral-tongue coat | Female | Adult    | Spore Medium (Aerobic)         | 99.83 | 0.73 |
| PF3KT09003A    | ORT-AF04-176   | Oral-tongue coat | Female | Adult    | Spore Medium (Anaerobic)       | 99.32 | 0    |
| PF3KT09004A    | ORT-AF04-177   | Oral-tongue coat | Female | Adult    | Spore Medium (Anaerobic)       | 99.32 | 0    |
| PF3KT09005A    | ORT-AF04-227   | Oral-tongue coat | Female | Adult    | Spore Medium (Anaerobic)       | 100   | 0.07 |
| PF3KT10003A    | ORT-AF05-233   | Oral-tongue coat | Female | Adult    | Spore Medium (Anaerobic)       | 100   | 0    |
| PF3KT12001     | ORT-AM05-13    | Oral-tongue coat | Male   | Adult    | Spore Medium (Aerobic)         | 99.87 | 0.3  |



|              |              |                  |        |          |                                |       |      |
|--------------|--------------|------------------|--------|----------|--------------------------------|-------|------|
| PF3KT12001AB | ORT-AM05-105 | Oral-tongue coat | Male   | Adult    | Blood-Spore Medium (Anaerobic) | 99.45 | 0.27 |
| PF3KT12002AB | ORT-AM05-106 | Oral-tongue coat | Male   | Adult    | Blood-Spore Medium (Anaerobic) | 99.94 | 0.28 |
| PF3KT12003AB | ORT-AM05-500 | Oral-tongue coat | Male   | Adult    | Blood-Spore Medium (Anaerobic) | 99.87 | 0.2  |
| PF3KT12003B  | ORT-AM05-112 | Oral-tongue coat | Male   | Adult    | Blood-Spore Medium (Aerobic)   | 100   | 0    |
| PF3KT12005B  | ORT-AM05-304 | Oral-tongue coat | Male   | Adult    | Blood-Spore Medium (Aerobic)   | 99.33 | 0    |
| PF3KT12006A  | ORT-AM05-451 | Oral-tongue coat | Male   | Adult    | Spore Medium (Aerobic)         | 100   | 0.34 |
| PF3KT14001   | ORT-TM07-195 | Oral-tongue coat | Male   | Teenager | Spore Medium (Aerobic)         | 99.49 | 0.76 |
| PF3KT14001A  | ORT-TM07-93  | Oral-tongue coat | Male   | Teenager | Spore Medium (Anaerobic)       | 99.46 | 0.23 |
| PF3KT14001AB | ORT-TM07-110 | Oral-tongue coat | Male   | Teenager | Blood-Spore Medium (Anaerobic) | 100   | 0.59 |
| PF3KT14001B  | ORT-TM07-310 | Oral-tongue coat | Male   | Teenager | Blood-Spore Medium (Aerobic)   | 99.49 | 0.76 |
| PF3KT14002A  | ORT-TM07-94  | Oral-tongue coat | Male   | Teenager | Spore Medium (Anaerobic)       | 99.45 | 0.46 |
| PF3KT14003AB | ORT-TM07-112 | Oral-tongue coat | Male   | Teenager | Blood-Spore Medium (Anaerobic) | 99.46 | 1.98 |
| PF3KT15003   | ORT-AM08-214 | Oral-tongue coat | Male   | Adult    | Spore Medium (Aerobic)         | 100   | 0    |
| PF3KT16002   | ORT-AF06-14  | Oral-tongue coat | Female | Adult    | Spore Medium (Aerobic)         | 99.49 | 0.76 |
| PF3KT16002B  | ORT-AF06-148 | Oral-tongue coat | Female | Adult    | Blood-Spore Medium (Aerobic)   | 99.33 | 0    |
| SF3KA08003A  | ORS-AF03-239 | Oral- saliva     | Female | Adult    | SCH Medium (Anaerobic)         | 100   | 0    |
| SF3KA09001   | ORS-AF04-52  | Oral- saliva     | Female | Adult    | SCH Medium (Aerobic)           | 99.34 | 0    |
| SF3KA09003   | ORS-AF04-54  | Oral- saliva     | Female | Adult    | SCH Medium (Aerobic)           | 99.83 | 0.2  |
| SF3KA09008   | ORS-AF04-59  | Oral- saliva     | Female | Adult    | SCH Medium (Aerobic)           | 99.83 | 0.4  |
| SF3KA12006A  | ORS-AM05-380 | Oral- saliva     | Male   | Adult    | SCH Medium (Anaerobic)         | 99.05 | 0    |
| SF3KA12009AB | ORS-AM05-383 | Oral- saliva     | Male   | Adult    | Blood-SCH Medium (Anaerobic)   | 100   | 0.95 |
| SF3KA12011AB | ORS-AM05-471 | Oral- saliva     | Male   | Adult    | SCH Medium (Aerobic)           | 100   | 0.71 |
| SF3KA13001   | ORS-TM06-37  | Oral- saliva     | Male   | Teenager | SCH Medium (Aerobic)           | 99.92 | 0    |
| SF3KA13001A  | ORS-TM06-130 | Oral- saliva     | Male   | Teenager | SCH Medium (Anaerobic)         | 100   | 0    |
| SF3KA13003   | ORS-TM06-39  | Oral- saliva     | Male   | Teenager | SCH Medium (Aerobic)           | 99.95 | 0.51 |
| SF3KA13005A  | ORS-TM06-134 | Oral- saliva     | Male   | Teenager | SCH Medium (Anaerobic)         | 99.45 | 0    |
| SF3KA13011A  | ORS-TM06-140 | Oral- saliva     | Male   | Teenager | SCH Medium (Anaerobic)         | 100   | 0    |
| SF3KA13014A  | ORS-TM06-237 | Oral- saliva     | Male   | Teenager | SCH Medium (Anaerobic)         | 99.66 | 0    |
| SF3KA14003AB | ORS-TM07-76  | Oral- saliva     | Male   | Teenager | Blood-SCH Medium (Anaerobic)   | 98.46 | 0    |
| SF3KA14004A  | ORS-TM07-35  | Oral- saliva     | Male   | Teenager | SCH Medium (Anaerobic)         | 99.63 | 0    |
| SF3KA14004AB | ORS-TM07-77  | Oral- saliva     | Male   | Teenager | Blood-SCH Medium (Anaerobic)   | 98.46 | 0    |
| SF3KA14006AB | ORS-TM07-79  | Oral- saliva     | Male   | Teenager | Blood-SCH Medium (Anaerobic)   | 98.46 | 0    |
| SF3KA14007B  | ORS-TM07-269 | Oral- saliva     | Male   | Teenager | Blood-SCH Medium (Aerobic)     | 99.87 | 0.24 |
| SF3KA14008B  | ORS-TM07-270 | Oral- saliva     | Male   | Teenager | Blood-SCH Medium (Aerobic)     | 99.45 | 0    |
| SF3KA15001A  | ORS-AM08-46  | Oral- saliva     | Male   | Adult    | SCH Medium (Anaerobic)         | 99.45 | 0.27 |
| SF3KA15002AB | ORS-AM08-79  | Oral- saliva     | Male   | Adult    | Blood-SCH Medium (Anaerobic)   | 100   | 0    |
| SF3KA15003A  | ORS-AM08-48  | Oral- saliva     | Male   | Adult    | SCH Medium (Anaerobic)         | 99.45 | 0.27 |
| SF3KA15003AB | ORS-AM08-180 | Oral- saliva     | Male   | Adult    | Blood-SCH Medium (Anaerobic)   | 99.32 | 0    |
| SF3KA15004A  | ORS-AM08-49  | Oral- saliva     | Male   | Adult    | SCH Medium (Anaerobic)         | 100   | 0.17 |
| SF3KA15005A  | ORS-AM08-163 | Oral- saliva     | Male   | Adult    | SCH Medium (Anaerobic)         | 100   | 0    |
| SF3KA16005   | ORS-AF06-137 | Oral- saliva     | Female | Adult    | SCH Medium (Aerobic)           | 99.33 | 0    |
| SF3KC09001   | ODP-AF04-107 | Oral-tooth       | Female | Adult    | SCH Medium (Aerobic)           | 99.83 | 0.58 |
| SF3KC09001A  | ODP-AF04-166 | Oral-tooth       | Female | Adult    | SCH Medium (Anaerobic)         | 100   | 0    |
| SF3KC09002   | ODP-AF04-108 | Oral-tooth       | Female | Adult    | SCH Medium (Aerobic)           | 99.83 | 0.58 |
| SF3KC10002   | ODP-AF05-197 | Oral-tooth       | Female | Adult    | SCH Medium (Aerobic)           | 99.34 | 0    |
| SF3KC10002A  | ODP-AF05-91  | Oral-tooth       | Female | Adult    | SCH Medium (Anaerobic)         | 100   | 0.47 |
| SF3KC10006A  | ODP-AF05-95  | Oral-tooth       | Female | Adult    | SCH Medium (Anaerobic)         | 100   | 0    |
| SF3KC10008   | ODP-AF05-203 | Oral-tooth       | Female | Adult    | SCH Medium (Aerobic)           | 100   | 0.07 |
| SF3KC11001A  | ODP-AM04-51  | Oral-tooth       | Male   | Adult    | SCH Medium (Anaerobic)         | 98.56 | 0    |
| SF3KC11002   | ODP-AM04-150 | Oral-tooth       | Male   | Adult    | SCH Medium (Aerobic)           | 99.33 | 0    |
| SF3KC11002A  | ODP-AM04-52  | Oral-tooth       | Male   | Adult    | SCH Medium (Anaerobic)         | 99.45 | 0.18 |
| SF3KC11004A  | ODP-AM04-126 | Oral-tooth       | Male   | Adult    | SCH Medium (Anaerobic)         | 99.92 | 0.45 |
| SF3KC12001   | ODP-AM05-46  | Oral-tooth       | Male   | Adult    | SCH Medium (Aerobic)           | 99.7  | 0.23 |
| SF3KC12002A  | ODP-AM05-252 | Oral-tooth       | Male   | Adult    | SCH Medium (Anaerobic)         | 99.42 | 0.44 |
| SF3KC12002AB | ODP-AM05-394 | Oral-tooth       | Male   | Adult    | Blood-SCH Medium (Anaerobic)   | 99.63 | 0.12 |
| SF3KC12003AB | ODP-AM05-395 | Oral-tooth       | Male   | Adult    | Blood-SCH Medium (Anaerobic)   | 99    | 0.09 |
| SF3KC12004   | ODP-AM05-49  | Oral-tooth       | Male   | Adult    | SCH Medium (Aerobic)           | 99.87 | 0.3  |
| SF3KC12004AB | ODP-AM05-396 | Oral-tooth       | Male   | Adult    | Blood-SCH Medium (Anaerobic)   | 100   | 0.16 |
| SF3KC12005AB | ODP-AM05-464 | Oral-tooth       | Male   | Adult    | SCH Medium (Aerobic)           | 100   | 1.14 |
| SF3KC13002A  | ODP-TM06-166 | Oral-tooth       | Male   | Teenager | SCH Medium (Anaerobic)         | 100   | 0.47 |
| SF3KC13003A  | ODP-TM06-167 | Oral-tooth       | Male   | Teenager | SCH Medium (Anaerobic)         | 100   | 0.47 |
| SF3KC14001B  | ODP-TM07-212 | Oral-tooth       | Male   | Teenager | Blood-SCH Medium (Aerobic)     | 99.87 | 0.24 |
| SF3KC15002   | ODP-AM08-250 | Oral-tooth       | Male   | Adult    | SCH Medium (Aerobic)           | 99.34 | 0    |
| SF3KC15004A  | ODP-AM08-316 | Oral-tooth       | Male   | Adult    | SCH Medium (Anaerobic)         | 98.46 | 0    |
| SF3KC15013A  | ODP-AM08-325 | Oral-tooth       | Male   | Adult    | SCH Medium (Anaerobic)         | 99.45 | 0    |
| SF3KC16006   | ODP-AF06-107 | Oral-tooth       | Female | Adult    | SCH Medium (Aerobic)           | 100   | 0    |
| SF3KT08005A  | ORT-AF03-190 | Oral-tongue coat | Female | Adult    | SCH Medium (Anaerobic)         | 100   | 0    |
| SF3KT09001   | ORT-AF04-29  | Oral-tongue coat | Female | Adult    | SCH Medium (Aerobic)           | 99.76 | 0.83 |
| SF3KT09001A  | ORT-AF04-121 | Oral-tongue coat | Female | Adult    | SCH Medium (Anaerobic)         | 99.9  | 1.08 |
| SF3KT09002   | ORT-AF04-30  | Oral-tongue coat | Female | Adult    | SCH Medium (Aerobic)           | 99.83 | 0.58 |
| SF3KT09003A  | ORT-AF04-228 | Oral-tongue coat | Female | Adult    | SCH Medium (Anaerobic)         | 99.76 | 0.83 |
| SF3KT09004A  | ORT-AF04-248 | Oral-tongue coat | Female | Adult    | SCH Medium (Anaerobic)         | 99.45 | 0.55 |
| SF3KT10004A  | ORT-AF05-139 | Oral-tongue coat | Female | Adult    | SCH Medium (Anaerobic)         | 100   | 0    |
| SF3KT10008A  | ORT-AF05-234 | Oral-tongue coat | Female | Adult    | SCH Medium (Anaerobic)         | 100   | 0.47 |
| SF3KT11001   | ORT-AM04-26  | Oral-tongue coat | Male   | Adult    | SCH Medium (Aerobic)           | 99.33 | 0    |
| SF3KT11002A  | ORT-AM04-73  | Oral-tongue coat | Male   | Adult    | SCH Medium (Anaerobic)         | 99.45 | 0    |
| SF3KT11005A  | ORT-AM04-81  | Oral-tongue coat | Male   | Adult    | SCH Medium (Anaerobic)         | 99.45 | 0    |
| SF3KT12001AB | ORT-AM05-107 | Oral-tongue coat | Male   | Adult    | Blood-SCH Medium (Anaerobic)   | 99.45 | 0.27 |
| SF3KT12001B  | ORT-AM05-308 | Oral-tongue coat | Male   | Adult    | Blood-SCH Medium (Aerobic)     | 99.33 | 0    |
| SF3KT12002A  | ORT-AM05-404 | Oral-tongue coat | Male   | Adult    | SCH Medium (Anaerobic)         | 100   | 0    |
| SF3KT12002AB | ORT-AM05-108 | Oral-tongue coat | Male   | Adult    | Blood-SCH Medium (Anaerobic)   | 99.94 | 0.28 |
| SF3KT12003AB | ORT-AM05-109 | Oral-tongue coat | Male   | Adult    | Blood-SCH Medium (Anaerobic)   | 99.45 | 0.27 |
| SF3KT13001A  | ORT-TM06-205 | Oral-tongue coat | Male   | Teenager | SCH Medium (Anaerobic)         | 99.84 | 0.15 |
| SF3KT13003A  | ORT-TM06-207 | Oral-tongue coat | Male   | Teenager | SCH Medium (Anaerobic)         | 99.32 | 0    |
| SF3KT13004A  | ORT-TM06-208 | Oral-tongue coat | Male   | Teenager | SCH Medium (Anaerobic)         | 100   | 0    |
| SF3KT13006A  | ORT-TM06-210 | Oral-tongue coat | Male   | Teenager | SCH Medium (Anaerobic)         | 99.32 | 0    |

|             |                    |                  |        |          |                            |       |      |
|-------------|--------------------|------------------|--------|----------|----------------------------|-------|------|
| SF3KT13007A | ORT-TM06-211       | Oral-tongue coat | Male   | Teenager | SCH Medium (Anaerobic)     | 100   | 0.47 |
| SF3KT13008A | ORT-TM06-212       | Oral-tongue coat | Male   | Teenager | SCH Medium (Anaerobic)     | 99.32 | 0    |
| SF3KT13012A | ORT-TM06-249       | Oral-tongue coat | Male   | Teenager | SCH Medium (Anaerobic)     | 99.45 | 0.27 |
| SF3KT14001B | ORT-TM07-208       | Oral-tongue coat | Male   | Teenager | Blood-SCH Medium (Aerobic) | 99.33 | 0    |
| SF3KT15002  | ORT-AM08-487       | Oral-tongue coat | Male   | Adult    | SCH Medium (Aerobic)       | 99.33 | 0    |
| SF3KT16002  | ORT-AF06-16        | Oral-tongue coat | Female | Adult    | SCH Medium (Aerobic)       | 100   | 0.48 |
| SF3KT16005  | ORT-AF06-19        | Oral-tongue coat | Female | Adult    | SCH Medium (Aerobic)       | 99.49 | 0.76 |
| SF3KT16008  | ORT-AF06-143       | Oral-tongue coat | Female | Adult    | SCH Medium (Aerobic)       | 99.33 | 0    |
| T2011065150 | ORS-AM09-1-2-O-BH  | Oral- saliva     | Male   | Adult    | Blood-BHI (Aerobic)        | 99.96 | 0.22 |
| T2011065152 | ORS-AM09-3-O-BH    | Oral- saliva     | Male   | Adult    | Blood-BHI (Aerobic)        | 100   | 0.47 |
| T2011065153 | ORS-AM09-4-O-BH    | Oral- saliva     | Male   | Adult    | Blood-BHI (Aerobic)        | 100   | 0.38 |
| T2011065154 | ORS-AM09-5-O-BH    | Oral- saliva     | Male   | Adult    | Blood-BHI (Aerobic)        | 100   | 0    |
| T2011065155 | ORS-AM09-6-O-BH    | Oral- saliva     | Male   | Adult    | Blood-BHI (Aerobic)        | 100   | 0.38 |
| T2011065157 | ORS-AM09-8-O-BH    | Oral- saliva     | Male   | Adult    | Blood-BHI (Aerobic)        | 99.82 | 0.47 |
| T2011065158 | ORS-AM09-9-O-BH    | Oral- saliva     | Male   | Adult    | Blood-BHI (Aerobic)        | 99.82 | 0.47 |
| T2011065159 | ORS-AM09-10-O-BH   | Oral- saliva     | Male   | Adult    | Blood-BHI (Aerobic)        | 99.82 | 0.47 |
| T2011065161 | ORS-AM09-12-2-O-BH | Oral- saliva     | Male   | Adult    | Blood-BHI (Aerobic)        | 100   | 0    |
| T2011065165 | ORS-AM09-16-O-BH   | Oral- saliva     | Male   | Adult    | Blood-BHI (Aerobic)        | 99.62 | 0    |
| T2011065166 | ORS-AM09-17-O-BH   | Oral- saliva     | Male   | Adult    | Blood-BHI (Aerobic)        | 99.82 | 0.47 |
| T2011065167 | ORS-AM09-18-O-BH   | Oral- saliva     | Male   | Adult    | Blood-BHI (Aerobic)        | 100   | 0.18 |
| T2011065168 | ORS-AM09-19-O-BH   | Oral- saliva     | Male   | Adult    | Blood-BHI (Aerobic)        | 99.82 | 0.25 |
| T2011065169 | ORS-AM09-20-O-BH   | Oral- saliva     | Male   | Adult    | Blood-BHI (Aerobic)        | 100   | 0    |
| T2011065170 | ORS-AM09-22-O-BH   | Oral- saliva     | Male   | Adult    | Blood-BHI (Aerobic)        | 100   | 0    |
| T2011065171 | ORS-AM09-23-O-BH   | Oral- saliva     | Male   | Adult    | Blood-BHI (Aerobic)        | 100   | 0.95 |
| T2011065172 | ORS-AM09-24-O-BH   | Oral- saliva     | Male   | Adult    | Blood-BHI (Aerobic)        | 100   | 0    |
| T2011065173 | ORS-AM09-25-O-BH   | Oral- saliva     | Male   | Adult    | Blood-BHI (Aerobic)        | 99.33 | 0    |
| T2011065174 | ORS-AM09-26-O-BH   | Oral- saliva     | Male   | Adult    | Blood-BHI (Aerobic)        | 100   | 0.18 |
| T2011065176 | ORS-AM09-28-O-BH   | Oral- saliva     | Male   | Adult    | Blood-BHI (Aerobic)        | 100   | 0.63 |
| T2011065177 | ORS-AM09-29-O-BH   | Oral- saliva     | Male   | Adult    | Blood-BHI (Aerobic)        | 100   | 0.38 |
| T2011065178 | ORS-AM09-30-O-BH   | Oral- saliva     | Male   | Adult    | Blood-BHI (Aerobic)        | 100   | 0.95 |
| T2011065179 | ORS-AM09-31-1-O-BH | Oral- saliva     | Male   | Adult    | Blood-BHI (Aerobic)        | 99.92 | 0.23 |
| T2011065180 | ORS-AM09-31-2-O-BH | Oral- saliva     | Male   | Adult    | Blood-BHI (Aerobic)        | 99.92 | 0.23 |
| T2011065182 | ORS-AM09-33-O-BH   | Oral- saliva     | Male   | Adult    | Blood-BHI (Aerobic)        | 99.9  | 0.31 |
| T2011065185 | ORS-AM09-36-O-BH   | Oral- saliva     | Male   | Adult    | Blood-BHI (Aerobic)        | 100   | 0    |
| T2011065187 | ORS-AM09-39-O-BH   | Oral- saliva     | Male   | Adult    | Blood-BHI (Aerobic)        | 100   | 0    |
| T2011065188 | ORS-AM09-40-O-BH   | Oral- saliva     | Male   | Adult    | Blood-BHI (Aerobic)        | 99.96 | 0.27 |
| T2011065189 | ORS-AM09-41-O-BH   | Oral- saliva     | Male   | Adult    | Blood-BHI (Aerobic)        | 99.92 | 0.23 |
| T2011065191 | ORS-AM09-43-O-BH   | Oral- saliva     | Male   | Adult    | Blood-BHI (Aerobic)        | 99.87 | 1    |
| T2011065192 | ORS-AM09-45-O-BH   | Oral- saliva     | Male   | Adult    | Blood-BHI (Aerobic)        | 99.42 | 0.2  |
| T2011065196 | ODP-AM09-1-1-O-BH  | Oral-tooth       | Male   | Adult    | Blood-BHI (Aerobic)        | 99.17 | 0.24 |
| T2011065197 | ODP-AM09-1-2-O-BH  | Oral-tooth       | Male   | Adult    | Blood-BHI (Aerobic)        | 99.17 | 0.24 |
| T2011065200 | ODP-AM09-3-O-BH    | Oral-tooth       | Male   | Adult    | Blood-BHI (Aerobic)        | 100   | 0.47 |
| T2011065201 | ODP-AM09-4-O-BH    | Oral-tooth       | Male   | Adult    | Blood-BHI (Aerobic)        | 100   | 0.19 |
| T2011065202 | ODP-AM09-5-O-BH    | Oral-tooth       | Male   | Adult    | Blood-BHI (Aerobic)        | 100   | 0.19 |
| T2011065206 | ODP-AM09-9-O-BH    | Oral-tooth       | Male   | Adult    | Blood-BHI (Aerobic)        | 99.82 | 0.47 |
| T2011065207 | ODP-AM09-10-O-BH   | Oral-tooth       | Male   | Adult    | Blood-BHI (Aerobic)        | 100   | 0    |
| T2011065209 | ODP-AM09-12-O-BH   | Oral-tooth       | Male   | Adult    | Blood-BHI (Aerobic)        | 99.82 | 0.47 |
| T2011065210 | ODP-AM09-13-O-BH   | Oral-tooth       | Male   | Adult    | Blood-BHI (Aerobic)        | 99.81 | 0    |
| T2011065213 | ODP-AM09-16-O-BH   | Oral-tooth       | Male   | Adult    | Blood-BHI (Aerobic)        | 99.82 | 0.64 |
| T2011065214 | ODP-AM09-17-O-BH   | Oral-tooth       | Male   | Adult    | Blood-BHI (Aerobic)        | 100   | 0.18 |
| T2011065216 | ODP-AM09-19-O-BH   | Oral-tooth       | Male   | Adult    | Blood-BHI (Aerobic)        | 98.9  | 1.39 |
| T2011065217 | ODP-AM09-20-O-BH   | Oral-tooth       | Male   | Adult    | Blood-BHI (Aerobic)        | 99.82 | 0.47 |
| T2011065220 | ODP-AM09-23-O-BH   | Oral-tooth       | Male   | Adult    | Blood-BHI (Aerobic)        | 100   | 0.18 |
| T2011065222 | ODP-AM09-25-O-BH   | Oral-tooth       | Male   | Adult    | Blood-BHI (Aerobic)        | 100   | 4.29 |
| T2011065225 | ODP-AM09-28-O-BH   | Oral-tooth       | Male   | Adult    | Blood-BHI (Aerobic)        | 100   | 0.47 |
| T2011065226 | ODP-AM09-29-O-BH   | Oral-tooth       | Male   | Adult    | Blood-BHI (Aerobic)        | 100   | 0    |
| T2011065228 | ODP-AM09-31-O-BH   | Oral-tooth       | Male   | Adult    | Blood-BHI (Aerobic)        | 100   | 0    |
| T2011065230 | ODP-AM09-33-O-BH   | Oral-tooth       | Male   | Adult    | Blood-BHI (Aerobic)        | 100   | 0    |
| T2011065231 | ODP-AM09-34-O-BH   | Oral-tooth       | Male   | Adult    | Blood-BHI (Aerobic)        | 100   | 0.95 |
| T2011065233 | ODP-AM09-36-O-BH   | Oral-tooth       | Male   | Adult    | Blood-BHI (Aerobic)        | 99.82 | 0.47 |
| T2011065234 | ODP-AM09-37-O-BH   | Oral-tooth       | Male   | Adult    | Blood-BHI (Aerobic)        | 100   | 0    |
| T2011065235 | ODP-AM09-38-O-BH   | Oral-tooth       | Male   | Adult    | Blood-BHI (Aerobic)        | 99.74 | 0.47 |
| T2011065236 | ODP-AM09-39-O-BH   | Oral-tooth       | Male   | Adult    | Blood-BHI (Aerobic)        | 99.74 | 1.03 |
| T2011065238 | ODP-AM09-41-O-BH   | Oral-tooth       | Male   | Adult    | Blood-BHI (Aerobic)        | 99.66 | 0    |
| T2011065239 | ODP-AM09-42-O-BH   | Oral-tooth       | Male   | Adult    | Blood-BHI (Aerobic)        | 99.82 | 0.47 |
| T2011065241 | ODP-AM09-44-O-BH   | Oral-tooth       | Male   | Adult    | Blood-BHI (Aerobic)        | 100   | 0.47 |
| T2011065242 | ODP-AM09-45-O-BH   | Oral-tooth       | Male   | Adult    | Blood-BHI (Aerobic)        | 99.82 | 0.47 |
| T2011065243 | ODP-AM09-46-O-BH   | Oral-tooth       | Male   | Adult    | Blood-BHI (Aerobic)        | 99.82 | 0.64 |
| T2011065244 | ODP-AM09-47-O-BH   | Oral-tooth       | Male   | Adult    | Blood-BHI (Aerobic)        | 99.82 | 0.47 |
| T2011065245 | ODP-AM09-48-O-BH   | Oral-tooth       | Male   | Adult    | Blood-BHI (Aerobic)        | 100   | 0    |
| T2011065246 | ODP-AM09-49-O-BH   | Oral-tooth       | Male   | Adult    | Blood-BHI (Aerobic)        | 99.87 | 0.6  |
| T2011068060 | ORS-AM09-2-BH      | Oral- saliva     | Male   | Adult    | Blood-BHI (Anaerobic)      | 100   | 0.47 |
| T2011068063 | ORS-AM09-5-BH      | Oral- saliva     | Male   | Adult    | Blood-BHI (Anaerobic)      | 99.37 | 0    |
| T2011068065 | ORS-AM09-7-BH      | Oral- saliva     | Male   | Adult    | Blood-BHI (Anaerobic)      | 99.45 | 0.27 |
| T2011068069 | ORS-AM09-12-BH     | Oral- saliva     | Male   | Adult    | Blood-BHI (Anaerobic)      | 100   | 0.47 |
| T2011068071 | ORS-AM09-16-BH     | Oral- saliva     | Male   | Adult    | Blood-BHI (Anaerobic)      | 99.82 | 0.64 |
| T2011068073 | ORS-AM09-18-BH     | Oral- saliva     | Male   | Adult    | Blood-BHI (Anaerobic)      | 100   | 0.47 |
| T2011068074 | ORS-AM09-19-BH     | Oral- saliva     | Male   | Adult    | Blood-BHI (Anaerobic)      | 98.56 | 0    |
| T2011068075 | ORS-AM09-20-BH     | Oral- saliva     | Male   | Adult    | Blood-BHI (Anaerobic)      | 99.44 | 0.29 |
| T2011068076 | ORS-AM09-22-BH     | Oral- saliva     | Male   | Adult    | Blood-BHI (Anaerobic)      | 100   | 0.95 |
| T2011068079 | ORS-AM09-26-BH     | Oral- saliva     | Male   | Adult    | Blood-BHI (Anaerobic)      | 100   | 0.47 |
| T2011068080 | ORS-AM09-27-BH     | Oral- saliva     | Male   | Adult    | Blood-BHI (Anaerobic)      | 100   | 0.19 |
| T2011068081 | ORS-AM09-28-BH     | Oral- saliva     | Male   | Adult    | Blood-BHI (Anaerobic)      | 99.66 | 0.11 |
| T2011068082 | ORS-AM09-29-BH     | Oral- saliva     | Male   | Adult    | Blood-BHI (Anaerobic)      | 100   | 0.47 |
| T2011068083 | ORS-AM09-30-BH     | Oral- saliva     | Male   | Adult    | Blood-BHI (Anaerobic)      | 99.44 | 0.29 |
| T2011068084 | ORS-AM09-31-BH     | Oral- saliva     | Male   | Adult    | Blood-BHI (Anaerobic)      | 100   | 0.47 |

|             |                   |                  |        |       |                        |       |      |
|-------------|-------------------|------------------|--------|-------|------------------------|-------|------|
| T2011068085 | ORS-AM09-32-BH    | Oral- saliva     | Male   | Adult | Blood-BHI (Anaerobic)  | 98.28 | 0    |
| T2011068087 | ODP-AM09-1-BH     | Oral-tooth       | Male   | Adult | Blood-BHI (Anaerobic)  | 99.74 | 0.47 |
| T2011068089 | ODP-AM09-3-BH     | Oral-tooth       | Male   | Adult | Blood-BHI (Anaerobic)  | 99.82 | 0.47 |
| T2011068093 | ODP-AM09-7-BH     | Oral-tooth       | Male   | Adult | Blood-BHI (Anaerobic)  | 99.82 | 0.47 |
| T2011068096 | ODP-AM09-11-BH    | Oral-tooth       | Male   | Adult | Blood-BHI (Anaerobic)  | 100   | 0    |
| T2011068099 | ODP-AM09-14-BH    | Oral-tooth       | Male   | Adult | Blood-BHI (Anaerobic)  | 100   | 0    |
| T2011068107 | ODP-AM09-22-BH    | Oral-tooth       | Male   | Adult | Blood-BHI (Anaerobic)  | 99.82 | 0.47 |
| T2011068108 | ODP-AM09-23-BH    | Oral-tooth       | Male   | Adult | Blood-BHI (Anaerobic)  | 99.87 | 0.2  |
| T2011068109 | ODP-AM09-24-BH    | Oral-tooth       | Male   | Adult | Blood-BHI (Anaerobic)  | 99.82 | 0.47 |
| T2011068112 | ODP-AM09-27-BH    | Oral-tooth       | Male   | Adult | Blood-BHI (Anaerobic)  | 99.42 | 0.2  |
| T2011068113 | ODP-AM09-30-BH    | Oral-tooth       | Male   | Adult | Blood-BHI (Anaerobic)  | 100   | 0    |
| T2011068114 | ODP-AM09-32-BH    | Oral-tooth       | Male   | Adult | Blood-BHI (Anaerobic)  | 99.82 | 0.47 |
| T2011068115 | ODP-AM09-33-BH    | Oral-tooth       | Male   | Adult | Blood-BHI (Anaerobic)  | 99.54 | 0.71 |
| T2011068116 | ODP-AM09-34-BH    | Oral-tooth       | Male   | Adult | Blood-BHI (Anaerobic)  | 99    | 0.09 |
| T2011068119 | ODP-AM09-37-BH    | Oral-tooth       | Male   | Adult | Blood-BHI (Anaerobic)  | 100   | 1.9  |
| T2011068120 | ODP-AM09-39-BH    | Oral-tooth       | Male   | Adult | Blood-BHI (Anaerobic)  | 100   | 0    |
| T2011068121 | ODP-AM09-41-BH    | Oral-tooth       | Male   | Adult | Blood-BHI (Anaerobic)  | 100   | 0.47 |
| T2011068122 | ODP-AM09-43-BH    | Oral-tooth       | Male   | Adult | Blood-BHI (Anaerobic)  | 100   | 0    |
| T2101076727 | ORT-AM09-2-O-104  | Oral-tongue coat | Male   | Adult | MPYG Medium (Aerobic)  | 99.82 | 0.24 |
| T2101076728 | ORT-AM09-3-O-104  | Oral-tongue coat | Male   | Adult | MPYG Medium (Aerobic)  | 99.82 | 0.32 |
| T2101076730 | ORT-AM09-5-O-104  | Oral-tongue coat | Male   | Adult | MPYG Medium (Aerobic)  | 100   | 0    |
| T2101076731 | ORT-AM09-6-O-104  | Oral-tongue coat | Male   | Adult | MPYG Medium (Aerobic)  | 99.87 | 1    |
| T2101076732 | ORT-AM09-7-O-104  | Oral-tongue coat | Male   | Adult | MPYG Medium (Aerobic)  | 100   | 0    |
| T2101076733 | ORT-AM09-8-O-104  | Oral-tongue coat | Male   | Adult | MPYG Medium (Aerobic)  | 100   | 0.07 |
| T2101076734 | ORT-AM09-9-O-104  | Oral-tongue coat | Male   | Adult | MPYG Medium (Aerobic)  | 100   | 0    |
| T2101076735 | ORT-AM09-10-O-104 | Oral-tongue coat | Male   | Adult | MPYG Medium (Aerobic)  | 99.45 | 0.27 |
| T2101076737 | ORT-AM09-12-O-104 | Oral-tongue coat | Male   | Adult | MPYG Medium (Aerobic)  | 99.32 | 0    |
| T2101076738 | ORT-AM09-13-O-104 | Oral-tongue coat | Male   | Adult | MPYG Medium (Aerobic)  | 99.49 | 0.17 |
| T2101076739 | ORT-AM09-14-O-104 | Oral-tongue coat | Male   | Adult | MPYG Medium (Aerobic)  | 99.83 | 0    |
| T2101076741 | ORT-AM09-18-O-104 | Oral-tongue coat | Male   | Adult | MPYG Medium (Aerobic)  | 99.92 | 0.55 |
| T2101076743 | ORT-AM09-20-O-104 | Oral-tongue coat | Male   | Adult | MPYG Medium (Aerobic)  | 100   | 0.07 |
| T2101076744 | ORT-AM09-21-O-104 | Oral-tongue coat | Male   | Adult | MPYG Medium (Aerobic)  | 99.17 | 0.33 |
| T2101076745 | ORT-AM09-22-O-104 | Oral-tongue coat | Male   | Adult | MPYG Medium (Aerobic)  | 99.82 | 0.2  |
| T2101076746 | ORT-AM09-23-O-104 | Oral-tongue coat | Male   | Adult | MPYG Medium (Aerobic)  | 99.83 | 0.17 |
| T2101076747 | ORT-AM09-24-O-104 | Oral-tongue coat | Male   | Adult | MPYG Medium (Aerobic)  | 99.82 | 0.2  |
| T2101076748 | ORT-AM09-25-O-104 | Oral-tongue coat | Male   | Adult | MPYG Medium (Aerobic)  | 98.56 | 0.57 |
| T2101076749 | ORT-AM09-26-O-104 | Oral-tongue coat | Male   | Adult | MPYG Medium (Aerobic)  | 99.83 | 0.17 |
| T2101076750 | ORT-AM09-28-O-104 | Oral-tongue coat | Male   | Adult | MPYG Medium (Aerobic)  | 99.83 | 0.17 |
| T2101076751 | ORT-AM09-29-O-104 | Oral-tongue coat | Male   | Adult | MPYG Medium (Aerobic)  | 99.83 | 0    |
| T2101076754 | ODP-AM09-2-O-104  | Oral-tooth       | Male   | Adult | MPYG Medium (Aerobic)  | 99.82 | 0.24 |
| T2101076755 | ODP-AM09-3-O-104  | Oral-tooth       | Male   | Adult | MPYG Medium (Aerobic)  | 99.82 | 0.24 |
| T2101076756 | ODP-AM09-4-O-104  | Oral-tooth       | Male   | Adult | MPYG Medium (Aerobic)  | 99    | 0.09 |
| T2101076757 | ODP-AM09-5-O-104  | Oral-tooth       | Male   | Adult | MPYG Medium (Aerobic)  | 100   | 0    |
| T2101076758 | ODP-AM09-6-O-104  | Oral-tooth       | Male   | Adult | MPYG Medium (Aerobic)  | 99.87 | 0.2  |
| T2101076761 | ODP-AM09-9-O-104  | Oral-tooth       | Male   | Adult | MPYG Medium (Aerobic)  | 99.82 | 0.2  |
| T2101076762 | ODP-AM09-10-O-104 | Oral-tooth       | Male   | Adult | MPYG Medium (Aerobic)  | 99.82 | 0.2  |
| T2101076764 | ODP-AM09-12-O-104 | Oral-tooth       | Male   | Adult | MPYG Medium (Aerobic)  | 99.35 | 0    |
| T2101076767 | ODP-AM09-16-O-104 | Oral-tooth       | Male   | Adult | MPYG Medium (Aerobic)  | 99.82 | 0.2  |
| T2101076768 | ODP-AM09-18-O-104 | Oral-tooth       | Male   | Adult | MPYG Medium (Aerobic)  | 99.82 | 0.32 |
| T2101076769 | ODP-AM09-19-O-104 | Oral-tooth       | Male   | Adult | MPYG Medium (Aerobic)  | 99.82 | 0.32 |
| T2101076770 | ODP-AM09-20-O-104 | Oral-tooth       | Male   | Adult | MPYG Medium (Aerobic)  | 99.82 | 0.24 |
| T2101076771 | ODP-AM09-21-O-104 | Oral-tooth       | Male   | Adult | MPYG Medium (Aerobic)  | 99.87 | 0.2  |
| T2101076772 | ODP-AM09-22-O-104 | Oral-tooth       | Male   | Adult | MPYG Medium (Aerobic)  | 99.87 | 0.2  |
| T2101076773 | ODP-AM09-23-O-104 | Oral-tooth       | Male   | Adult | MPYG Medium (Aerobic)  | 99.82 | 0.2  |
| T2101076774 | ORS-AM09-1-O-104  | Oral- saliva     | Male   | Adult | MPYG Medium (Aerobic)  | 100   | 0.4  |
| T2101076775 | ORS-AM09-2-O-104  | Oral- saliva     | Male   | Adult | MPYG Medium (Aerobic)  | 99.7  | 0.25 |
| T2101076776 | ORS-AM09-3-O-104  | Oral- saliva     | Male   | Adult | MPYG Medium (Aerobic)  | 99.49 | 0.17 |
| T2101076777 | ORS-AM09-4-O-104  | Oral- saliva     | Male   | Adult | MPYG Medium (Aerobic)  | 99.82 | 0.2  |
| T2101076780 | ORS-AM09-7-O-104  | Oral- saliva     | Male   | Adult | MPYG Medium (Aerobic)  | 100   | 0.19 |
| T2101076781 | ORS-AM09-8-O-104  | Oral- saliva     | Male   | Adult | MPYG Medium (Aerobic)  | 99.9  | 0.68 |
| T2101076782 | ORS-AM09-9-O-104  | Oral- saliva     | Male   | Adult | MPYG Medium (Aerobic)  | 99.82 | 0.2  |
| T2101076783 | ORS-AM09-10-O-104 | Oral- saliva     | Male   | Adult | MPYG Medium (Aerobic)  | 100   | 0    |
| T2101076784 | ORS-AM09-11-O-104 | Oral- saliva     | Male   | Adult | MPYG Medium (Aerobic)  | 99.82 | 0.2  |
| T2101076786 | ORS-AM09-13-O-104 | Oral- saliva     | Male   | Adult | MPYG Medium (Aerobic)  | 99.96 | 0.55 |
| T2101076787 | ORS-AM09-14-O-104 | Oral- saliva     | Male   | Adult | MPYG Medium (Aerobic)  | 99.92 | 0.55 |
| T2101076788 | ORS-AM09-15-O-104 | Oral- saliva     | Male   | Adult | MPYG Medium (Aerobic)  | 99.9  | 0.15 |
| T2101076789 | ORS-AM09-16-O-104 | Oral- saliva     | Male   | Adult | MPYG Medium (Aerobic)  | 99.9  | 0.68 |
| T2101076791 | ORS-AM09-21-O-104 | Oral- saliva     | Male   | Adult | MPYG Medium (Aerobic)  | 99.96 | 2.33 |
| T2101076792 | ORS-AM09-23-O-104 | Oral- saliva     | Male   | Adult | MPYG Medium (Aerobic)  | 100   | 0    |
| T2101076793 | ORS-AM09-24-O-104 | Oral- saliva     | Male   | Adult | MPYG Medium (Aerobic)  | 99.49 | 0.17 |
| T2101076794 | ORS-AM09-27-O-104 | Oral- saliva     | Male   | Adult | MPYG Medium (Aerobic)  | 99.82 | 0.2  |
| T2101076795 | ORS-AF08-1-MRS    | Oral- saliva     | Female | Adult | MRS Medium (Anaerobic) | 100   | 0.34 |
| T2101076796 | ORS-AF08-2-MRS    | Oral- saliva     | Female | Adult | MRS Medium (Anaerobic) | 99.9  | 0.68 |
| T2101076797 | ORS-AF08-3-MRS    | Oral- saliva     | Female | Adult | MRS Medium (Anaerobic) | 98.91 | 0    |
| T2101076798 | ORS-AF08-4-MRS    | Oral- saliva     | Female | Adult | MRS Medium (Anaerobic) | 99.82 | 0.2  |
| T2101076799 | ORS-AF08-5-MRS    | Oral- saliva     | Female | Adult | MRS Medium (Anaerobic) | 99.9  | 0.68 |
| T2101076801 | ORS-AF08-7-MRS    | Oral- saliva     | Female | Adult | MRS Medium (Anaerobic) | 99.96 | 0.15 |
| T2101076802 | ORS-AF08-8-MRS    | Oral- saliva     | Female | Adult | MRS Medium (Anaerobic) | 99.82 | 0.24 |
| T2101076803 | ORS-AF08-9-MRS    | Oral- saliva     | Female | Adult | MRS Medium (Anaerobic) | 99.32 | 0    |
| T2101076804 | ORS-AF08-12-MRS   | Oral- saliva     | Female | Adult | MRS Medium (Anaerobic) | 99.82 | 0.32 |
| T2101076805 | ORS-AF08-14-MRS   | Oral- saliva     | Female | Adult | MRS Medium (Anaerobic) | 99.45 | 0.82 |
| T2101076807 | ORS-AF08-16-MRS   | Oral- saliva     | Female | Adult | MRS Medium (Anaerobic) | 99.2  | 0    |
| T2101076808 | ORS-AF08-17-MRS   | Oral- saliva     | Female | Adult | MRS Medium (Anaerobic) | 99.82 | 0.32 |
| T2101076809 | ORS-AF08-18-MRS   | Oral- saliva     | Female | Adult | MRS Medium (Anaerobic) | 99.83 | 0    |
| T2101076810 | ORS-AF08-19-MRS   | Oral- saliva     | Female | Adult | MRS Medium (Anaerobic) | 99.32 | 0    |
| T2101076811 | ORS-AF08-20-MRS   | Oral- saliva     | Female | Adult | MRS Medium (Anaerobic) | 99.96 | 2.33 |

|             |                   |                  |        |       |                                |       |      |
|-------------|-------------------|------------------|--------|-------|--------------------------------|-------|------|
| T2101076813 | ORS-AF08-23-MRS   | Oral- saliva     | Female | Adult | MRS Medium (Anaerobic)         | 99.9  | 0.68 |
| T2101076815 | ORS-AF08-25-MRS   | Oral- saliva     | Female | Adult | MRS Medium (Anaerobic)         | 100   | 0    |
| T2101076817 | ORS-AF08-27-MRS   | Oral- saliva     | Female | Adult | MRS Medium (Anaerobic)         | 99.45 | 1.55 |
| T2101076820 | ORS-AF08-30-MRS   | Oral- saliva     | Female | Adult | MRS Medium (Anaerobic)         | 99.9  | 0.68 |
| T2101076821 | ODP-AF08-1-MRS    | Oral-tooth       | Female | Adult | MRS Medium (Anaerobic)         | 100   | 0    |
| T2101076822 | ODP-AF08-2-MRS    | Oral-tooth       | Female | Adult | MRS Medium (Anaerobic)         | 100   | 0    |
| T2101076825 | ODP-AF08-7-MRS    | Oral-tooth       | Female | Adult | MRS Medium (Anaerobic)         | 99.82 | 0.2  |
| T2101076826 | ODP-AF08-8-MRS    | Oral-tooth       | Female | Adult | MRS Medium (Anaerobic)         | 99.82 | 0.2  |
| T2101076827 | ODP-AF08-10-MRS   | Oral-tooth       | Female | Adult | MRS Medium (Anaerobic)         | 99.82 | 0.2  |
| T2101076828 | ODP-AF08-11-MRS   | Oral-tooth       | Female | Adult | MRS Medium (Anaerobic)         | 100   | 0    |
| T2101076829 | ODP-AF08-13-MRS   | Oral-tooth       | Female | Adult | MRS Medium (Anaerobic)         | 99.35 | 0    |
| T2101076831 | ODP-AF08-15-MRS   | Oral-tooth       | Female | Adult | MRS Medium (Anaerobic)         | 99.29 | 0.07 |
| T2101076832 | ODP-AF08-16-MRS   | Oral-tooth       | Female | Adult | MRS Medium (Anaerobic)         | 99.35 | 0    |
| T2101076833 | ODP-AF08-17-MRS   | Oral-tooth       | Female | Adult | MRS Medium (Anaerobic)         | 100   | 0    |
| T2101076834 | ODP-AF08-18-MRS   | Oral-tooth       | Female | Adult | MRS Medium (Anaerobic)         | 100   | 0    |
| T2101076835 | ODP-AF08-20-MRS   | Oral-tooth       | Female | Adult | MRS Medium (Anaerobic)         | 99.35 | 0    |
| T2101076836 | ODP-AF08-21-MRS   | Oral-tooth       | Female | Adult | MRS Medium (Anaerobic)         | 99.82 | 0.2  |
| T2101076837 | ODP-AF08-22-MRS   | Oral-tooth       | Female | Adult | MRS Medium (Anaerobic)         | 100   | 0    |
| T2101076838 | ODP-AF08-23-MRS   | Oral-tooth       | Female | Adult | MRS Medium (Anaerobic)         | 99.82 | 0.2  |
| T2101076840 | ODP-AF08-27-MRS   | Oral-tooth       | Female | Adult | MRS Medium (Anaerobic)         | 100   | 0    |
| T2101076841 | ODP-AF08-28-MRS   | Oral-tooth       | Female | Adult | MRS Medium (Anaerobic)         | 99.45 | 0.55 |
| T2101076844 | ODP-AF08-35-MRS   | Oral-tooth       | Female | Adult | MRS Medium (Anaerobic)         | 99.82 | 0.2  |
| T2101076845 | ODP-AF08-36-MRS   | Oral-tooth       | Female | Adult | MRS Medium (Anaerobic)         | 99.82 | 0.2  |
| T2101076846 | ODP-AF08-37-MRS   | Oral-tooth       | Female | Adult | MRS Medium (Anaerobic)         | 99.45 | 0.55 |
| T2101076847 | ODP-AF08-38-MRS   | Oral-tooth       | Female | Adult | MRS Medium (Anaerobic)         | 99.82 | 0.2  |
| T2101076848 | ODP-AF08-39-MRS   | Oral-tooth       | Female | Adult | MRS Medium (Anaerobic)         | 99.82 | 0.24 |
| T2101076849 | ODP-AF08-40-MRS   | Oral-tooth       | Female | Adult | MRS Medium (Anaerobic)         | 99.35 | 0    |
| T2101076850 | ODP-AF08-41-MRS   | Oral-tooth       | Female | Adult | MRS Medium (Anaerobic)         | 99.82 | 0.2  |
| T2101076851 | ODP-AF08-42-MRS   | Oral-tooth       | Female | Adult | MRS Medium (Anaerobic)         | 99.82 | 0.24 |
| T2101076854 | ORT-AF08-11-MRS   | Oral-tongue coat | Female | Adult | MRS Medium (Anaerobic)         | 100   | 0    |
| T2101076857 | ORT-AF08-19-MRS   | Oral-tongue coat | Female | Adult | MRS Medium (Anaerobic)         | 100   | 0    |
| T2101076858 | ORT-AF08-24-MRS   | Oral-tongue coat | Female | Adult | MRS Medium (Anaerobic)         | 99.9  | 0.15 |
| T2101076859 | ORT-AF08-28-MRS   | Oral-tongue coat | Female | Adult | MRS Medium (Anaerobic)         | 99.35 | 0    |
| T2101076860 | ORT-AF08-32-MRS   | Oral-tongue coat | Female | Adult | MRS Medium (Anaerobic)         | 99.35 | 0    |
| T2101076861 | ORT-AF08-34-MRS   | Oral-tongue coat | Female | Adult | MRS Medium (Anaerobic)         | 99.82 | 0.2  |
| T2101076862 | ORT-AF08-35-MRS   | Oral-tongue coat | Female | Adult | MRS Medium (Anaerobic)         | 100   | 0    |
| T2101076866 | ORT-AF08-43-MRS   | Oral-tongue coat | Female | Adult | MRS Medium (Anaerobic)         | 99.87 | 0.2  |
| T2101078470 | ORT-AM09-5D4      | Oral-tongue coat | Male   | Adult | Blood-Enriched-BHI (Anaerobic) | 100   | 0    |
| T2101078472 | ORT-AM09-5D6      | Oral-tongue coat | Male   | Adult | Blood-Enriched-BHI (Anaerobic) | 99.91 | 0.61 |
| T2101078474 | ODP-AM09-2D1      | Oral-tooth       | Male   | Adult | Blood-Enriched-BHI (Anaerobic) | 99.44 | 0.29 |
| T2101078475 | ODP-AM09-2D2      | Oral-tooth       | Male   | Adult | Blood-Enriched-BHI (Anaerobic) | 99.44 | 0.29 |
| T2101078477 | ODP-AM09-2D4A     | Oral-tooth       | Male   | Adult | Blood-Enriched-BHI (Anaerobic) | 99.44 | 0.29 |
| T2101078478 | ODP-AM09-2D4B     | Oral-tooth       | Male   | Adult | Blood-Enriched-BHI (Anaerobic) | 99.44 | 0.29 |
| T2101078479 | ODP-AM09-2D5      | Oral-tooth       | Male   | Adult | Blood-Enriched-BHI (Anaerobic) | 99.46 | 0.22 |
| T2101078481 | ODP-AM09-2D6      | Oral-tooth       | Male   | Adult | Blood-Enriched-BHI (Anaerobic) | 99.63 | 0    |
| T2101078490 | ODP-AM09-2D16     | Oral-tooth       | Male   | Adult | Blood-Enriched-BHI (Anaerobic) | 99.44 | 0.29 |
| T2101078492 | ODP-AM09-2D18     | Oral-tooth       | Male   | Adult | Blood-Enriched-BHI (Anaerobic) | 100   | 0    |
| T2101078494 | ODP-AM09-2D20     | Oral-tooth       | Male   | Adult | Blood-Enriched-BHI (Anaerobic) | 99.88 | 0.29 |
| T2101078495 | ODP-AM09-2D21     | Oral-tooth       | Male   | Adult | Blood-Enriched-BHI (Anaerobic) | 100   | 0    |
| T2101078500 | ODP-AF08-11-O-MRS | Oral-tooth       | Female | Adult | MRS Medium (Aerobic)           | 99.65 | 0.07 |
| T2101078504 | ODP-AF08-18-O-MRS | Oral-tooth       | Female | Adult | MRS Medium (Aerobic)           | 99.9  | 0.68 |
| T2101078508 | ODP-AF08-25-O-MRS | Oral-tooth       | Female | Adult | MRS Medium (Aerobic)           | 99.65 | 0.07 |
| T2101078509 | ODP-AF08-26-O-MRS | Oral-tooth       | Female | Adult | MRS Medium (Aerobic)           | 100   | 0    |
| T2101078510 | ODP-AF08-27-O-MRS | Oral-tooth       | Female | Adult | MRS Medium (Aerobic)           | 99.65 | 0.07 |
| T2101078518 | ORT-AF08-12-O-MRS | Oral-tongue coat | Female | Adult | MRS Medium (Aerobic)           | 99.9  | 0.68 |
| T2101078520 | ORT-AF08-14-O-MRS | Oral-tongue coat | Female | Adult | MRS Medium (Aerobic)           | 100   | 0    |
| T2101078525 | ORT-AF08-20-O-MRS | Oral-tongue coat | Female | Adult | MRS Medium (Aerobic)           | 100   | 0    |
| T2101078526 | ORT-AF08-21-O-MRS | Oral-tongue coat | Female | Adult | MRS Medium (Aerobic)           | 99.82 | 0.2  |
| T2101081681 | ORS-AM09-1-104    | Oral- saliva     | Male   | Adult | MPYG Medium (Anaerobic)        | 99.82 | 0.25 |
| T2101081682 | ORS-AM09-2-104    | Oral- saliva     | Male   | Adult | MPYG Medium (Anaerobic)        | 99.37 | 0    |
| T2101081683 | ORS-AM09-3-104    | Oral- saliva     | Male   | Adult | MPYG Medium (Anaerobic)        | 98.37 | 0    |
| T2101081684 | ORS-AM09-4-104    | Oral- saliva     | Male   | Adult | MPYG Medium (Anaerobic)        | 100   | 0.11 |
| T2101081685 | ORS-AM09-5-104    | Oral- saliva     | Male   | Adult | MPYG Medium (Anaerobic)        | 99.82 | 0.8  |
| T2101081686 | ORS-AM09-6-104    | Oral- saliva     | Male   | Adult | MPYG Medium (Anaerobic)        | 100   | 0    |
| T2101081688 | ORS-AM09-8-104    | Oral- saliva     | Male   | Adult | MPYG Medium (Anaerobic)        | 99.96 | 0.27 |
| T2101081689 | ORS-AM09-9-104    | Oral- saliva     | Male   | Adult | MPYG Medium (Anaerobic)        | 99.82 | 0.47 |
| T2101081690 | ORS-AM09-10-104   | Oral- saliva     | Male   | Adult | MPYG Medium (Anaerobic)        | 99.62 | 0.11 |
| T2101081692 | ORS-AM09-12-104   | Oral- saliva     | Male   | Adult | MPYG Medium (Anaerobic)        | 99.44 | 0.29 |
| T2101081693 | ORS-AM09-13-104   | Oral- saliva     | Male   | Adult | MPYG Medium (Anaerobic)        | 100   | 0    |
| T2101081695 | ORS-AM09-15-104   | Oral- saliva     | Male   | Adult | MPYG Medium (Anaerobic)        | 100   | 0.17 |
| T2101081696 | ORS-AM09-16-104   | Oral- saliva     | Male   | Adult | MPYG Medium (Anaerobic)        | 99.82 | 0.64 |
| T2101081698 | ORS-AM09-18-104   | Oral- saliva     | Male   | Adult | MPYG Medium (Anaerobic)        | 100   | 0    |
| T2101081699 | ORS-AM09-19-104   | Oral- saliva     | Male   | Adult | MPYG Medium (Anaerobic)        | 99.82 | 0.47 |
| T2101081702 | ORS-AM09-22-104   | Oral- saliva     | Male   | Adult | MPYG Medium (Anaerobic)        | 99.82 | 1.03 |
| T2101081708 | ODP-AM09-3-104    | Oral-tooth       | Male   | Adult | MPYG Medium (Anaerobic)        | 99.82 | 4.32 |
| T2101081710 | ODP-AM09-5-104    | Oral-tooth       | Male   | Adult | MPYG Medium (Anaerobic)        | 99.82 | 0.64 |
| T2101081711 | ODP-AM09-6-104    | Oral-tooth       | Male   | Adult | MPYG Medium (Anaerobic)        | 99.82 | 0.25 |
| T2101081713 | ODP-AM09-8-104    | Oral-tooth       | Male   | Adult | MPYG Medium (Anaerobic)        | 100   | 0    |
| T2101081714 | ODP-AM09-9-104    | Oral-tooth       | Male   | Adult | MPYG Medium (Anaerobic)        | 99.82 | 0.25 |
| T2101081715 | ODP-AM09-10-104   | Oral-tooth       | Male   | Adult | MPYG Medium (Anaerobic)        | 99.82 | 0.47 |
| T2101081716 | ODP-AM09-11-104   | Oral-tooth       | Male   | Adult | MPYG Medium (Anaerobic)        | 100   | 0    |
| T2101081717 | ODP-AM09-12-104   | Oral-tooth       | Male   | Adult | MPYG Medium (Anaerobic)        | 99.82 | 0.25 |
| T2101081718 | ODP-AM09-13-104   | Oral-tooth       | Male   | Adult | MPYG Medium (Anaerobic)        | 99.82 | 0.25 |
| T2101081719 | ODP-AM09-14-104   | Oral-tooth       | Male   | Adult | MPYG Medium (Anaerobic)        | 100   | 0.42 |
| T2101081720 | ODP-AM09-15-104   | Oral-tooth       | Male   | Adult | MPYG Medium (Anaerobic)        | 99.82 | 0.47 |
| T2101081722 | ODP-AM09-17-104   | Oral-tooth       | Male   | Adult | MPYG Medium (Anaerobic)        | 99.87 | 0.2  |

|             |                  |                  |        |       |                                |       |      |
|-------------|------------------|------------------|--------|-------|--------------------------------|-------|------|
| T2101081723 | ODP-AM09-18-104  | Oral-tooth       | Male   | Adult | MPYG Medium (Anaerobic)        | 100   | 0    |
| T2101081725 | ODP-AM09-20-104  | Oral-tooth       | Male   | Adult | MPYG Medium (Anaerobic)        | 99.82 | 0.25 |
| T2101081726 | ODP-AM09-21-104  | Oral-tooth       | Male   | Adult | MPYG Medium (Anaerobic)        | 99.82 | 0.25 |
| T2101081727 | ODP-AM09-22-104  | Oral-tooth       | Male   | Adult | MPYG Medium (Anaerobic)        | 100   | 0    |
| T2101081728 | ODP-AM09-23-104  | Oral-tooth       | Male   | Adult | MPYG Medium (Anaerobic)        | 99.82 | 0.64 |
| T2101081729 | ODP-AM09-24-104  | Oral-tooth       | Male   | Adult | MPYG Medium (Anaerobic)        | 100   | 0    |
| T2101081731 | ODP-AM09-26-104  | Oral-tooth       | Male   | Adult | MPYG Medium (Anaerobic)        | 99.87 | 0.2  |
| T2101081732 | ODP-AM09-27-104  | Oral-tooth       | Male   | Adult | MPYG Medium (Anaerobic)        | 99.82 | 0.64 |
| T2101081734 | ORT-AM09-3-104   | Oral-tongue coat | Male   | Adult | MPYG Medium (Anaerobic)        | 100   | 0    |
| T2101081735 | ORT-AM09-5-104   | Oral-tongue coat | Male   | Adult | MPYG Medium (Anaerobic)        | 100   | 0.18 |
| T2101081736 | ORT-AM09-6-104   | Oral-tongue coat | Male   | Adult | MPYG Medium (Anaerobic)        | 100   | 0.18 |
| T2101081738 | ORT-AM09-8-104   | Oral-tongue coat | Male   | Adult | MPYG Medium (Anaerobic)        | 100   | 0    |
| T2101081739 | ORT-AM09-9-104   | Oral-tongue coat | Male   | Adult | MPYG Medium (Anaerobic)        | 100   | 0    |
| T2101081740 | ORT-AM09-10-104  | Oral-tongue coat | Male   | Adult | MPYG Medium (Anaerobic)        | 100   | 0    |
| T2101081744 | ORT-AM09-14-104  | Oral-tongue coat | Male   | Adult | MPYG Medium (Anaerobic)        | 100   | 0.47 |
| T2101081746 | ORT-AM09-17-104  | Oral-tongue coat | Male   | Adult | MPYG Medium (Anaerobic)        | 100   | 0.38 |
| T2101081747 | ORT-AM09-19-104  | Oral-tongue coat | Male   | Adult | MPYG Medium (Anaerobic)        | 100   | 0    |
| T2101081750 | ORT-AM09-23-104  | Oral-tongue coat | Male   | Adult | MPYG Medium (Anaerobic)        | 100   | 0    |
| T2102085941 | ORS-AF08-20      | Oral- saliva     | Female | Adult | MPYG Medium (Anaerobic)        | 99.52 | 0.2  |
| T2102085942 | ORS-AF08-21      | Oral- saliva     | Female | Adult | MPYG Medium (Anaerobic)        | 99.82 | 0.2  |
| T2102085943 | ORS-AF08-22      | Oral- saliva     | Female | Adult | MPYG Medium (Anaerobic)        | 99.82 | 0.2  |
| T2102085944 | ORS-AF08-23      | Oral- saliva     | Female | Adult | MPYG Medium (Anaerobic)        | 99.2  | 0    |
| T2102085945 | ORS-AF08-24      | Oral- saliva     | Female | Adult | MPYG Medium (Anaerobic)        | 99.82 | 0.2  |
| T2102085947 | ORT-AF08-2       | Oral-tongue coat | Female | Adult | MPYG Medium (Anaerobic)        | 99.65 | 0.07 |
| T2102085948 | ORT-AF08-3       | Oral-tongue coat | Female | Adult | MPYG Medium (Anaerobic)        | 98.01 | 0.02 |
| T2102085949 | ORT-AF08-4       | Oral-tongue coat | Female | Adult | MPYG Medium (Anaerobic)        | 99.17 | 0.33 |
| T2102085950 | ORT-AF08-5       | Oral-tongue coat | Female | Adult | MPYG Medium (Anaerobic)        | 99.2  | 0    |
| T2102085951 | ORT-AF08-6       | Oral-tongue coat | Female | Adult | MPYG Medium (Anaerobic)        | 99.96 | 0.15 |
| T2102085952 | ORT-AF08-7       | Oral-tongue coat | Female | Adult | MPYG Medium (Anaerobic)        | 100   | 0    |
| T2102085953 | ORT-AF08-8       | Oral-tongue coat | Female | Adult | MPYG Medium (Anaerobic)        | 99.96 | 0.15 |
| T2102085954 | ORT-AF08-9       | Oral-tongue coat | Female | Adult | MPYG Medium (Anaerobic)        | 99.96 | 0.15 |
| T2102085955 | ORT-AF08-10      | Oral-tongue coat | Female | Adult | MPYG Medium (Anaerobic)        | 98.79 | 0.17 |
| T2102085956 | ORT-AF08-11      | Oral-tongue coat | Female | Adult | MPYG Medium (Anaerobic)        | 99.82 | 0.27 |
| T2102085957 | ORT-AF08-12      | Oral-tongue coat | Female | Adult | MPYG Medium (Anaerobic)        | 99.9  | 0.15 |
| T2102085958 | ORT-AF08-13      | Oral-tongue coat | Female | Adult | MPYG Medium (Anaerobic)        | 99.82 | 0.27 |
| T2102085960 | ORT-AF08-15      | Oral-tongue coat | Female | Adult | MPYG Medium (Anaerobic)        | 99.96 | 0.15 |
| T2102085961 | ORT-AF08-16      | Oral-tongue coat | Female | Adult | MPYG Medium (Anaerobic)        | 99.87 | 1    |
| T2102085962 | ORT-AF08-17      | Oral-tongue coat | Female | Adult | MPYG Medium (Anaerobic)        | 99.66 | 0    |
| T2102085963 | ORT-AF08-18      | Oral-tongue coat | Female | Adult | MPYG Medium (Anaerobic)        | 99.49 | 0.17 |
| T2102085964 | ORT-AF08-19      | Oral-tongue coat | Female | Adult | MPYG Medium (Anaerobic)        | 99.82 | 0    |
| T2102085965 | ODP-AF08-2       | Oral-tooth       | Female | Adult | MPYG Medium (Anaerobic)        | 99.69 | 3.1  |
| T2102085966 | ODP-AF08-3       | Oral-tooth       | Female | Adult | MPYG Medium (Anaerobic)        | 99.35 | 0    |
| T2102085968 | ORS-AM09-5D1B    | Oral- saliva     | Male   | Adult | Blood-Enriched-BHI (Anaerobic) | 100   | 0    |
| T2102085969 | ORS-AM09-5D2A    | Oral- saliva     | Male   | Adult | Blood-Enriched-BHI (Anaerobic) | 98.6  | 0    |
| T2102085974 | ODP-AM09-2D3B    | Oral-tooth       | Male   | Adult | Blood-Enriched-BHI (Anaerobic) | 99.78 | 0    |
| T2102085975 | ORS-AF08-13B     | Oral- saliva     | Female | Adult | MRS Medium (Anaerobic)         | 98.91 | 0.82 |
| T2102085978 | ORT-AF08-8-MRS   | Oral-tongue coat | Female | Adult | MRS Medium (Aerobic)           | 99.33 | 0    |
| T2102085980 | ODP-AF08-20      | Oral-tooth       | Female | Adult | MRS Medium (Aerobic)           | 99.55 | 0.75 |
| T2103096290 | ORS-AF10-1-O-BH  | Oral- saliva     | Female | Adult | Blood-BHI (Aerobic)            | 100   | 0.59 |
| T2103096291 | ORS-AF10-5-O-BH  | Oral- saliva     | Female | Adult | Blood-BHI (Aerobic)            | 100   | 0.59 |
| T2103096292 | ORS-AF10-6-O-BH  | Oral- saliva     | Female | Adult | Blood-BHI (Aerobic)            | 99.92 | 0.23 |
| T2103096301 | ORS-AF10-17-O-BH | Oral- saliva     | Female | Adult | Blood-BHI (Aerobic)            | 99.7  | 0.23 |
| T2103096302 | ORS-AF10-18-O-BH | Oral- saliva     | Female | Adult | Blood-BHI (Aerobic)            | 99.34 | 0    |
| T2103096304 | ORS-AF10-20-O-BH | Oral- saliva     | Female | Adult | Blood-BHI (Aerobic)            | 99.87 | 0.2  |
| T2103096306 | ORS-AF10-23-O-BH | Oral- saliva     | Female | Adult | Blood-BHI (Aerobic)            | 100   | 0.47 |
| T2103096307 | ORS-AF10-24-O-BH | Oral- saliva     | Female | Adult | Blood-BHI (Aerobic)            | 99.92 | 0.23 |
| T2103096310 | ORS-AF10-28-O-BH | Oral- saliva     | Female | Adult | Blood-BHI (Aerobic)            | 100   | 0.47 |
| T2103096316 | ODP-AF10-3-O-BH  | Oral-tooth       | Female | Adult | Blood-BHI (Aerobic)            | 100   | 0.59 |
| T2103096318 | ODP-AF10-6-O-BH  | Oral-tooth       | Female | Adult | Blood-BHI (Aerobic)            | 99.34 | 0    |
| T2103096320 | ODP-AF10-9-O-BH  | Oral-tooth       | Female | Adult | Blood-BHI (Aerobic)            | 99.34 | 0    |
| T2103096321 | ODP-AF10-10-O-BH | Oral-tooth       | Female | Adult | Blood-BHI (Aerobic)            | 99.34 | 0    |
| T2103096323 | ODP-AF10-12-O-BH | Oral-tooth       | Female | Adult | Blood-BHI (Aerobic)            | 100   | 0.59 |
| T2103096327 | ODP-AF10-17-O-BH | Oral-tooth       | Female | Adult | Blood-BHI (Aerobic)            | 99.87 | 0    |
| T2103096348 | ORT-AF10-10-O-BH | Oral-tongue coat | Female | Adult | Blood-BHI (Aerobic)            | 99.88 | 0.15 |
| T2103096349 | ORT-AF10-11-O-BH | Oral-tongue coat | Female | Adult | Blood-BHI (Aerobic)            | 99.92 | 0.23 |
| T2103096352 | ORT-AF10-14-O-BH | Oral-tongue coat | Female | Adult | Blood-BHI (Aerobic)            | 99.83 | 0.6  |
| T2103096353 | ORT-AF10-15-O-BH | Oral-tongue coat | Female | Adult | Blood-BHI (Aerobic)            | 100   | 0    |
| T2103096354 | ORT-AF10-16-O-BH | Oral-tongue coat | Female | Adult | Blood-BHI (Aerobic)            | 99.34 | 0    |
| T2103096355 | ORT-AF10-18-O-BH | Oral-tongue coat | Female | Adult | Blood-BHI (Aerobic)            | 99.34 | 0    |
| T2103096356 | ORT-AF10-19-O-BH | Oral-tongue coat | Female | Adult | Blood-BHI (Aerobic)            | 100   | 0.47 |
| T2103096357 | ORT-AF10-20-O-BH | Oral-tongue coat | Female | Adult | Blood-BHI (Aerobic)            | 100   | 0    |
| T2103096358 | ORT-AF10-21-O-BH | Oral-tongue coat | Female | Adult | Blood-BHI (Aerobic)            | 98.34 | 0    |
| T2103096359 | ORT-AF10-22-O-BH | Oral-tongue coat | Female | Adult | Blood-BHI (Aerobic)            | 99.34 | 0    |
| T2103096360 | ORT-AF10-23-O-BH | Oral-tongue coat | Female | Adult | Blood-BHI (Aerobic)            | 99.32 | 0.17 |
| T2103096362 | ORT-AF10-25-O-BH | Oral-tongue coat | Female | Adult | Blood-BHI (Aerobic)            | 99.92 | 0.23 |
| T2103096363 | ORT-AF10-26-O-BH | Oral-tongue coat | Female | Adult | Blood-BHI (Aerobic)            | 99.88 | 0.15 |
| T2103096366 | ODP-AF10-C3      | Oral-tooth       | Female | Adult | BHI (Anaerobic)                | 98.46 | 0    |
| T2103096369 | ODP-AF10-C6      | Oral-tooth       | Female | Adult | BHI (Anaerobic)                | 99    | 0.09 |
| T2103096370 | ODP-AF10-C7      | Oral-tooth       | Female | Adult | BHI (Anaerobic)                | 100   | 0    |
| T2103096374 | ODP-AF10-C11     | Oral-tooth       | Female | Adult | BHI (Anaerobic)                | 100   | 0    |
| T2103096376 | ODP-AF10-C13     | Oral-tooth       | Female | Adult | BHI (Anaerobic)                | 100   | 0    |
| T2103096378 | ODP-AF10-C16     | Oral-tooth       | Female | Adult | BHI (Anaerobic)                | 100   | 0    |
| T2103096379 | ODP-AF10-C17     | Oral-tooth       | Female | Adult | BHI (Anaerobic)                | 100   | 0.47 |
| T2103096381 | ODP-AF10-C20     | Oral-tooth       | Female | Adult | BHI (Anaerobic)                | 100   | 0.47 |
| T2103096382 | ODP-AF10-C21     | Oral-tooth       | Female | Adult | BHI (Anaerobic)                | 99.82 | 0.28 |
| T2103096383 | ODP-AF10-C22     | Oral-tooth       | Female | Adult | BHI (Anaerobic)                | 99.53 | 0.47 |

|             |                  |                  |        |       |                         |       |      |
|-------------|------------------|------------------|--------|-------|-------------------------|-------|------|
| T2103096384 | ODP-AF10-C23     | Oral-tooth       | Female | Adult | BHI (Anaerobic)         | 99.82 | 0.2  |
| T2103096385 | ORT-AF10-C1      | Oral-tongue coat | Female | Adult | BHI (Anaerobic)         | 99.82 | 1.13 |
| T2103096389 | ORT-AF10-C6      | Oral-tongue coat | Female | Adult | BHI (Anaerobic)         | 98.92 | 1.1  |
| T2103096391 | ORT-AF10-C8      | Oral-tongue coat | Female | Adult | BHI (Anaerobic)         | 100   | 0.47 |
| T2103096393 | ORT-AF10-C11     | Oral-tongue coat | Female | Adult | BHI (Anaerobic)         | 99.87 | 0.2  |
| T2103096394 | ORT-AF10-C12     | Oral-tongue coat | Female | Adult | BHI (Anaerobic)         | 99.87 | 0.2  |
| T2103096395 | ORT-AF10-C13     | Oral-tongue coat | Female | Adult | BHI (Anaerobic)         | 99.49 | 0.68 |
| T2103096397 | ORT-AF10-C15     | Oral-tongue coat | Female | Adult | BHI (Anaerobic)         | 98.92 | 0.99 |
| T2103096401 | ORS-AF10-C5      | Oral- saliva     | Female | Adult | BHI (Anaerobic)         | 99.76 | 0.47 |
| T2103096403 | ORS-AF10-C8      | Oral- saliva     | Female | Adult | BHI (Anaerobic)         | 99.82 | 0.2  |
| T2103096404 | ORS-AF10-C9      | Oral- saliva     | Female | Adult | BHI (Anaerobic)         | 100   | 0.47 |
| T2103096405 | ORS-AF10-C11     | Oral- saliva     | Female | Adult | BHI (Anaerobic)         | 100   | 0    |
| T2103096406 | ORS-AF10-C12     | Oral- saliva     | Female | Adult | BHI (Anaerobic)         | 99.82 | 0.54 |
| T2103096407 | ORS-AF10-C13     | Oral- saliva     | Female | Adult | BHI (Anaerobic)         | 99.82 | 0.54 |
| T2103096409 | ORS-AF10-C15     | Oral- saliva     | Female | Adult | BHI (Anaerobic)         | 99.66 | 0.07 |
| T2103096412 | ORS-AF10-C18     | Oral- saliva     | Female | Adult | BHI (Anaerobic)         | 100   | 0.17 |
| T2103096413 | ORS-AF10-C19     | Oral- saliva     | Female | Adult | BHI (Anaerobic)         | 99.74 | 0.46 |
| T2103096414 | ORS-AF10-C20     | Oral- saliva     | Female | Adult | BHI (Anaerobic)         | 99.74 | 0.46 |
| T2103096415 | ORS-AF10-1-BH    | Oral- saliva     | Female | Adult | Blood-BHI (Anaerobic)   | 100   | 0    |
| T2103096416 | ORS-AF10-2-BH    | Oral- saliva     | Female | Adult | Blood-BHI (Anaerobic)   | 100   | 0    |
| T2103096417 | ORS-AF10-3-BH    | Oral- saliva     | Female | Adult | Blood-BHI (Anaerobic)   | 100   | 0    |
| T2103096419 | ORS-AF10-5-BH    | Oral- saliva     | Female | Adult | Blood-BHI (Anaerobic)   | 99.82 | 1.13 |
| T2103096421 | ORS-AF10-7-BH    | Oral- saliva     | Female | Adult | Blood-BHI (Anaerobic)   | 99.82 | 0.28 |
| T2103096422 | ORS-AF10-8-BH    | Oral- saliva     | Female | Adult | Blood-BHI (Anaerobic)   | 99.82 | 1.13 |
| T2103096423 | ORS-AF10-9-BH    | Oral- saliva     | Female | Adult | Blood-BHI (Anaerobic)   | 99.78 | 0.95 |
| T2103096424 | ORS-AF10-10-BH   | Oral- saliva     | Female | Adult | Blood-BHI (Anaerobic)   | 99.74 | 0.46 |
| T2103096425 | ORS-AF10-11-BH   | Oral- saliva     | Female | Adult | Blood-BHI (Anaerobic)   | 99.74 | 0.46 |
| T2103096426 | ORS-AF10-12-BH   | Oral- saliva     | Female | Adult | Blood-BHI (Anaerobic)   | 99.45 | 0    |
| T2103096427 | ORS-AF10-13-BH   | Oral- saliva     | Female | Adult | Blood-BHI (Anaerobic)   | 99.82 | 1.13 |
| T2103096428 | ORS-AF10-14-BH   | Oral- saliva     | Female | Adult | Blood-BHI (Anaerobic)   | 99.45 | 0    |
| T2103096436 | ORS-AF10-22-BH   | Oral- saliva     | Female | Adult | Blood-BHI (Anaerobic)   | 99.87 | 0.2  |
| T2103096438 | ORS-AF10-24-BH   | Oral- saliva     | Female | Adult | Blood-BHI (Anaerobic)   | 99.45 | 0.46 |
| T2103096330 | ODP-AF10-20-O-BH | Oral-tooth       | Female | Adult | Blood-BHI (Aerobic)     | 98.34 | 0    |
| T2103096333 | ODP-AF10-25-O-BH | Oral-tooth       | Female | Adult | Blood-BHI (Aerobic)     | 99.87 | 0    |
| T2103096329 | ODP-AF10-19-O-BH | Oral-tooth       | Female | Adult | Blood-BHI (Aerobic)     | 100   | 1.07 |
| T2103096337 | ODP-AF10-31-O-BH | Oral-tooth       | Female | Adult | Blood-BHI (Aerobic)     | 99.63 | 0    |
| T2103096336 | ODP-AF10-30-O-BH | Oral-tooth       | Female | Adult | Blood-BHI (Aerobic)     | 100   | 0.47 |
| T2103096328 | ODP-AF10-18-O-BH | Oral-tooth       | Female | Adult | Blood-BHI (Aerobic)     | 99.92 | 0.23 |
| T2103096346 | ORT-AF10-07-O-BH | Oral-tongue coat | Female | Adult | Blood-BHI (Aerobic)     | 99.82 | 0.25 |
| T2103096339 | ODP-AF10-33-O-BH | Oral-tooth       | Female | Adult | Blood-BHI (Aerobic)     | 100   | 0.47 |
| T2103096344 | ORT-AF10-05-O-BH | Oral-tongue coat | Female | Adult | Blood-BHI (Aerobic)     | 99.82 | 0.2  |
| T2103096332 | ODP-AF10-23-O-BH | Oral-tooth       | Female | Adult | Blood-BHI (Aerobic)     | 99.34 | 0    |
| T2103096331 | ODP-AF10-21-O-BH | Oral-tooth       | Female | Adult | Blood-BHI (Aerobic)     | 99.34 | 0    |
| T2103096347 | ORT-AF10-08-O-BH | Oral-tongue coat | Female | Adult | Blood-BHI (Aerobic)     | 100   | 0.58 |
| T2102085873 | ORS-AF08-6       | Oral- saliva     | Female | Adult | MPYG Medium (Anaerobic) | 99.96 | 0.15 |
| T2102085868 | ORS-AF08-1       | Oral- saliva     | Female | Adult | MPYG Medium (Anaerobic) | 99.2  | 0    |
| T2102085869 | ORS-AF08-2       | Oral- saliva     | Female | Adult | MPYG Medium (Anaerobic) | 99.25 | 0.15 |
| T2102085875 | ORS-AF08-8       | Oral- saliva     | Female | Adult | MPYG Medium (Anaerobic) | 100   | 0    |
| T2102085876 | ORS-AF08-9       | Oral- saliva     | Female | Adult | MPYG Medium (Anaerobic) | 99.96 | 0.15 |
| T2102085872 | ORS-AF08-5       | Oral- saliva     | Female | Adult | MPYG Medium (Anaerobic) | 99.49 | 0.17 |
| T2102085931 | ORS-AF08-10      | Oral- saliva     | Female | Adult | MPYG Medium (Anaerobic) | 99.87 | 0.24 |
| T2102085870 | ORS-AF08-3       | Oral- saliva     | Female | Adult | MPYG Medium (Anaerobic) | 100   | 0.07 |
| T2102085936 | ORS-AF08-15      | Oral- saliva     | Female | Adult | MPYG Medium (Anaerobic) | 99.9  | 0.9  |
| T2102085937 | ORS-AF08-16      | Oral- saliva     | Female | Adult | MPYG Medium (Anaerobic) | 100   | 0.37 |
| T2102085935 | ORS-AF08-14      | Oral- saliva     | Female | Adult | MPYG Medium (Anaerobic) | 99.82 | 0.2  |
| T2102085940 | ORS-AF08-19      | Oral- saliva     | Female | Adult | MPYG Medium (Anaerobic) | 99.82 | 0.2  |
| T2102085938 | ORS-AF08-17      | Oral- saliva     | Female | Adult | MPYG Medium (Anaerobic) | 99.82 | 0.27 |
| T2102085932 | ORS-AF08-11      | Oral- saliva     | Female | Adult | MPYG Medium (Anaerobic) | 99.32 | 0    |
| T2102085939 | ORS-AF08-18      | Oral- saliva     | Female | Adult | MPYG Medium (Anaerobic) | 99    | 0.09 |
| T2102085934 | ORS-AF08-13      | Oral- saliva     | Female | Adult | MPYG Medium (Anaerobic) | 99.82 | 0.2  |

Supplementary Table 2. The taxonomic information of 1,089 genomes in COGR.

| Genome ID    | Strain ID    | Ez_type match               | Similarity(%) | Phylum         | GTDB genus         | GTDB species('0' means no match) | Cluster id |
|--------------|--------------|-----------------------------|---------------|----------------|--------------------|----------------------------------|------------|
| BF3KA08004A  | ORS-AF03-140 | Enterococcus_casseliflavus  | 99.79         | Bacillota      | Enterococcus_D     | Enterococcus_D casseliflavus     | 1          |
| BF3KA09001A  | ORS-AF04-126 | Atopobium_parvulum          | 99.72         | Actinomycetota | Lancefieldella     | 0                                | 2          |
| BF3KA09002A  | ORS-AF04-178 | Atopobium_parvulum          | 99.72         | Actinomycetota | Lancefieldella     | 0                                | 2          |
| BF3KA09004   | ORS-AF04-35  | Streptococcus_sanguinis     | 99.86         | Bacillota      | Streptococcus      | Streptococcus sanguinis_H        | 3          |
| BF3KA09004A  | ORS-AF04-180 | Atopobium_parvulum          | 99.65         | Actinomycetota | Lancefieldella     | 0                                | 2          |
| BF3KA09005   | ORS-AF04-36  | Streptococcus_salivarius    | 99.86         | Bacillota      | Streptococcus      | Streptococcus salivarius         | 4          |
| BF3KA09008A  | ORS-AF04-232 | Streptococcus_oralis        | 98.84         | Bacillota      | Streptococcus      | Streptococcus xiaochunlingii     | 5          |
| BF3KA09009A  | ORS-AF04-233 | Streptococcus_parasanguinis | 99.37         | Bacillota      | Streptococcus      | Streptococcus sp900766505        | 6          |
| BF3KA09011A  | ORS-AF04-252 | Streptococcus_mitis         | 99.45         | Bacillota      | Streptococcus      | 0                                | 7          |
| BF3KA10007A  | ORS-AF05-07  | #N/A                        | #N/A          | Bacillota      | Streptococcus      | 0                                | 8          |
| BF3KA10010A  | ORS-AF05-10  | Streptococcus_salivarius    | 100.00        | Bacillota      | Streptococcus      | Streptococcus salivarius         | 4          |
| BF3KA10011A  | ORS-AF05-11  | Streptococcus_mitis         | 99.45         | Bacillota      | Streptococcus      | 0                                | 9          |
| BF3KA10012A  | ORS-AF05-12  | Streptococcus_salivarius    | 100.00        | Bacillota      | Streptococcus      | Streptococcus salivarius         | 4          |
| BF3KA10014A  | ORS-AF05-220 | Oribacterium_parvum         | 99.10         | Bacillota      | Oribacterium       | 0                                | 10         |
| BF3KA11001   | ORS-AM04-31  | Streptococcus_salivarius    | 99.86         | Bacillota      | Streptococcus      | Streptococcus salivarius         | 4          |
| BF3KA12001   | ORS-AM05-116 | Microbacterium_oxydans      | 99.79         | Actinomycetota | Microbacterium     | Microbacterium algeriense        | 12         |
| BF3KA12001AB | ORS-AM05-183 | Streptococcus_mitis         | 99.76         | Bacillota      | Streptococcus      | Streptococcus mitis_AZ           | 11         |
| BF3KA12001B  | ORS-AM05-155 | Streptococcus_salivarius    | 94.62         | Bacillota      | Streptococcus      | Streptococcus salivarius         | 4          |
| BF3KA12002   | ORS-AM05-117 | Rothia_dentocariosa         | 99.93         | Actinomycetota | Rothia             | Rothia dentocariosa              | 13         |
| BF3KA12003A  | ORS-AM05-344 | Streptococcus_rubneri       | 99.51         | Bacillota      | Streptococcus      | Streptococcus rubneri            | 14         |
| BF3KA12004B  | ORS-AM05-325 | Neisseria_flavescens        | 99.04         | Pseudomonadota | Neisseria          | Neisseria flavescens_B           | 15         |
| BF3KA12005AB | ORS-AM05-355 | Streptococcus_rubneri       | 99.51         | Bacillota      | Streptococcus      | Streptococcus rubneri            | 14         |
| BF3KA12006A  | ORS-AM05-478 | Streptococcus_timonensis    | 99.86         | Bacillota      | Streptococcus      | Streptococcus mitis_BG           | 16         |
| BF3KA12007AB | ORS-AM05-484 | Streptococcus_salivarius    | 100.00        | Bacillota      | Streptococcus      | Streptococcus salivarius         | 4          |
| BF3KA13001A  | ORS-TM06-82  | Gemella_sanguinis           | 99.86         | Bacillota      | Gemella            | Gemella sanguinis                | 17         |
| BF3KA13002A  | ORS-TM06-83  | Granulicatella_adiacens     | 99.72         | Bacillota      | Granulicatella     | 0                                | 18         |
| BF3KA13003A  | ORS-TM06-84  | Streptococcus_salivarius    | 99.86         | Bacillota      | Streptococcus      | Streptococcus salivarius         | 4          |
| BF3KA13009A  | ORS-TM06-215 | Veillonella_dispar          | 99.66         | Bacillota      | Veillonella        | 0                                | 19         |
| BF3KA13013A  | ORS-TM06-219 | Streptococcus_parasanguinis | 99.79         | Bacillota      | Streptococcus      | Streptococcus parasanguinis      | 20         |
| BF3KA14002A  | ORS-TM07-02  | Enterococcus_faecalis       | 100.00        | Bacillota      | Enterococcus       | Enterococcus faecalis            | 21         |
| BF3KA14002B  | ORS-TM07-230 | Streptococcus_salivarius    | 97.68         | Bacillota      | Streptococcus      | Streptococcus salivarius         | 4          |
| BF3KA14003   | ORS-TM07-215 | Streptococcus_sinensis      | 98.65         | Bacillota      | Streptococcus      | Streptococcus sinensis           | 24         |
| BF3KA14003A  | ORS-TM07-03  | Granulicatella_adiacens     | 99.86         | Bacillota      | Granulicatella     | Granulicatella adiacens          | 23         |
| BF3KA14003AB | ORS-TM07-38  | Streptococcus_parasanguinis | 98.84         | Bacillota      | Streptococcus      | 0                                | 22         |
| BF3KA14004AB | ORS-TM07-39  | Streptococcus_rubneri       | 99.86         | Bacillota      | Streptococcus      | Streptococcus rubneri            | 14         |
| BF3KA15001AB | ORS-AM08-50  | Streptococcus_parasanguinis | 99.31         | Bacillota      | Streptococcus      | Streptococcus sp001813295        | 6          |
| BF3KA15002A  | ORS-AM08-24  | Granulicatella_adiacens     | 99.72         | Bacillota      | Granulicatella     | 0                                | 25         |
| BF3KA15002AB | ORS-AM08-51  | Granulicatella_adiacens     | 99.72         | Bacillota      | Granulicatella     | Granulicatella sp001058355       | 18         |
| BF3KA15004AB | ORS-AM08-167 | Atopobium_parvulum          | 99.58         | Actinomycetota | Lancefieldella     | 0                                | 26         |
| BF3KC09003A  | ODP-AF04-151 | Granulicatella_adiacens     | 99.92         | Bacillota      | Granulicatella     | Granulicatella adiacens          | 23         |
| BF3KC09004A  | ODP-AF04-152 | Granulicatella_adiacens     | 98.22         | Bacillota      | Granulicatella     | Granulicatella adiacens          | 23         |
| BF3KC09005   | ODP-AF04-71  | Streptococcus_salivarius    | 99.86         | Bacillota      | Streptococcus      | Streptococcus salivarius         | 4          |
| BF3KC09006A  | ODP-AF04-188 | Actinomyces_odontolyticus   | 98.86         | Actinomycetota | Pauljensenia       | Pauljensenia odontolytica_A      | 27         |
| BF3KC09008   | ODP-AF04-74  | Rothia_dentocariosa         | 100.00        | Actinomycetota | Rothia             | Rothia dentocariosa              | 13         |
| BF3KC09008A  | ODP-AF04-238 | Streptococcus_sanguinis     | 99.86         | Bacillota      | Streptococcus      | Streptococcus sanguinis_H        | 3          |
| BF3KC11001   | ODP-AM04-38  | Streptococcus_salivarius    | 99.86         | Bacillota      | Streptococcus      | Streptococcus salivarius         | 4          |
| BF3KC11001A  | ODP-AM04-93  | Prevotella_histicola        | 99.62         | Bacteroidota   | Prevotella         | Prevotella histicola             | 28         |
| BF3KC12001A  | ODP-AM05-237 | Streptococcus_salivarius    | 100.00        | Bacillota      | Streptococcus      | Streptococcus salivarius         | 4          |
| BF3KC12001AB | ODP-AM05-254 | Streptococcus_sanguinis     | 99.86         | Bacillota      | Streptococcus      | Streptococcus sanguinis_G        | 29         |
| BF3KC12002   | ODP-AM05-18  | Rothia_dentocariosa         | 99.93         | Actinomycetota | Rothia             | Rothia dentocariosa              | 13         |
| BF3KC12002AB | ODP-AM05-255 | Granulicatella_adiacens     | 99.72         | Bacillota      | Granulicatella     | Granulicatella sp905371865       | 30         |
| BF3KC12003   | ODP-AM05-19  | Streptococcus_oralis        | 99.72         | Bacillota      | Streptococcus      | Streptococcus oralis_B           | 31         |
| BF3KC12004B  | ODP-AM05-113 | Rothia_aeria                | 99.86         | Actinomycetota | Rothia             | Rothia aeria                     | 32         |
| BF3KC12006   | ODP-AM05-22  | Granulicatella_adiacens     | 99.79         | Bacillota      | Granulicatella     | Granulicatella adiacens          | 23         |
| BF3KC12006A  | ODP-AM05-411 | Actinomyces_naeslundii      | 98.58         | Actinomycetota | Actinomyces        | Actinomyces naeslundii           | 33         |
| BF3KC13001A  | ODP-TM06-143 | Streptococcus_salivarius    | 100.00        | Bacillota      | Streptococcus      | Streptococcus salivarius         | 4          |
| BF3KC13003A  | ODP-TM06-145 | Granulicatella_adiacens     | 95.51         | Bacillota      | Granulicatella     | Granulicatella adiacens          | 23         |
| BF3KC14001   | ODP-TM07-197 | Microbacterium_oxydans      | 99.79         | Actinomycetota | Microbacterium     | Microbacterium algeriense        | 12         |
| BF3KC14001A  | ODP-TM07-115 | Granulicatella_adiacens     | 99.93         | Bacillota      | Granulicatella     | Granulicatella adiacens          | 23         |
| BF3KC14001AB | ODP-TM07-145 | Granulicatella_adiacens     | 98.64         | Bacillota      | Granulicatella     | Granulicatella adiacens          | 34         |
| BF3KC14001B  | ODP-TM07-209 | Streptococcus_oralis        | 99.04         | Bacillota      | Streptococcus      | Streptococcus oralis_T           | 35         |
| BF3KC14002   | ODP-TM07-198 | Streptococcus_cristatus     | 99.72         | Bacillota      | Streptococcus      | Streptococcus cristatus          | 36         |
| BF3KC14003B  | ODP-TM07-325 | Microbacterium_oxydans      | 99.79         | Actinomycetota | Microbacterium     | Microbacterium algeriense        | 12         |
| BF3KC15001A  | ODP-AM08-279 | Streptococcus_salivarius    | 100.00        | Bacillota      | Streptococcus      | Streptococcus salivarius         | 4          |
| BF3KC15002A  | ODP-AM08-280 | Granulicatella_adiacens     | 99.72         | Bacillota      | Granulicatella     | 0                                | 25         |
| BF3KC15004A  | ODP-AM08-282 | Abiotrophia_defectiva       | 98.24         | Bacillota      | Abiotrophia        | Abiotrophia defectiva            | 37         |
| BF3KC15004C  | ODP-AM08-246 | Rothia_dentocariosa         | 99.93         | Actinomycetota | Rothia             | Rothia dentocariosa              | 13         |
| BF3KC15006A  | ODP-AM08-284 | Actinomyces_odontolyticus   | 99.57         | Actinomycetota | Pauljensenia       | Pauljensenia odontolytica        | 38         |
| BF3KC15011A  | ODP-AM08-377 | Actinomyces_naeslundii      | 99.59         | Actinomycetota | Actinomyces        | Actinomyces naeslundii           | 33         |
| BF3KC15013A  | ODP-AM08-379 | Actinomyces_naeslundii      | 99.59         | Actinomycetota | Actinomyces        | Actinomyces naeslundii           | 33         |
| BF3KC15015A  | ODP-AM08-381 | Actinomyces_naeslundii      | 96.90         | Actinomycetota | Actinomyces        | Actinomyces oris                 | 39         |
| BF3KC15016A  | ODP-AM08-382 | Actinomyces_naeslundii      | 97.84         | Actinomycetota | Actinomyces        | Actinomyces naeslundii           | 33         |
| BF3KC15020A  | ODP-AM08-386 | Streptococcus_sanguinis     | 99.65         | Bacillota      | Streptococcus      | 0                                | 40         |
| BF3KC16005   | ODP-AF06-100 | Microbacterium_oxydans      | 99.79         | Actinomycetota | Microbacterium     | Microbacterium algeriense        | 12         |
| BF3KT08002   | ORT-AF03-65  | Rothia_mucilaginoso         | 99.58         | Actinomycetota | Rothia             | Rothia mucilaginoso_A            | 41         |
| BF3KT08005   | ORT-AF03-68  | Gemella_sanguinis           | 99.93         | Bacillota      | Gemella            | Gemella sanguinis                | 17         |
| BF3KT09001   | ORT-AF04-01  | Streptococcus_salivarius    | 99.86         | Bacillota      | Streptococcus      | Streptococcus salivarius         | 4          |
| BF3KT09001A  | ORT-AF04-115 | Atopobium_parvulum          | 99.72         | Actinomycetota | Lancefieldella     | 0                                | 2          |
| BF3KT09002A  | ORT-AF04-116 | Streptococcus_parasanguinis | 98.91         | Bacillota      | Streptococcus      | Streptococcus sp900766505        | 6          |
| BF3KT09003A  | ORT-AF04-169 | Actinomyces_odontolyticus   | 99.69         | Actinomycetota | Pauljensenia       | Pauljensenia sp001064145         | 42         |
| BF3KT09005A  | ORT-AF04-215 | Lactobacillus_paracasei     | 98.39         | Bacillota      | Lactocaseibacillus | Lactocaseibacillus paracasei     | 43         |
| BF3KT09006A  | ORT-AF04-216 | Streptococcus_parasanguinis | 98.91         | Bacillota      | Streptococcus      | Streptococcus sp900766505        | 6          |
| BF3KT09007A  | ORT-AF04-246 | Streptococcus_mitis         | 99.45         | Bacillota      | Streptococcus      | 0                                | 7          |

|              |              |                                              |           |                |                 |                                |    |
|--------------|--------------|----------------------------------------------|-----------|----------------|-----------------|--------------------------------|----|
| BF3KT11001   | ORT-AM04-01  | Streptococcus_salivarius                     | 99.86     | Bacillota      | Streptococcus   | Streptococcus salivarius       | 4  |
| BF3KT11001A  | ORT-AM04-53  | Streptococcus_salivarius                     | 100.00    | Bacillota      | Streptococcus   | Streptococcus salivarius       | 4  |
| BF3KT11003A  | ORT-AM04-76  | Granulicatella_adiacens                      | 98.22     | Bacillota      | Granulicatella  | Granulicatella adiacens        | 23 |
| BF3KT12001B  | ORT-AM05-52  | Neisseria_macacae                            | 99.52     | Pseudomonadota | Neisseria       | Neisseria sicca_A              | 44 |
| BF3KT12005   | ORT-AM05-291 | Streptococcus_salivarius                     | 100.00    | Bacillota      | Streptococcus   | Streptococcus salivarius       | 4  |
| BF3KT12005AB | ORT-AM05-406 | Actinomyces_odontolyticus                    | 99.08     | Actinomycetota | Pauljensenia    | Pauljensenia sp902373545       | 45 |
| BF3KT12006A  | ORT-AM05-398 | Solobacterium_moorei                         | 99.44     | Bacillota      | Bulleidia       | 0                              | 47 |
| BF3KT12006AB | ORT-AM05-453 | Streptococcus_constellatus                   | 99.12     | Bacillota      | Streptococcus   | Streptococcus constellatus     | 46 |
| BF3KT12007A  | ORT-AM05-445 | Granulicatella_adiacens                      | 98.36     | Bacillota      | Granulicatella  | 0                              | 25 |
| BF3KT12008A  | ORT-AM05-446 | Streptococcus_australis                      | 99.52     | Bacillota      | Streptococcus   | Streptococcus koreensis        | 48 |
| BF3KT13002   | ORT-TM06-63  | Gemella_sanguinis                            | 99.86     | Bacillota      | Gemella         | Gemella sanguinis              | 17 |
| BF3KT14001   | ORT-TM07-175 | Gemella_haemolysans                          | 99.93     | Bacillota      | Gemella         | Gemella haemolysans_B          | 49 |
| BF3KT14001A  | ORT-TM07-80  | Granulicatella_adiacens                      | 99.68     | Bacillota      | Granulicatella  | 0                              | 25 |
| BF3KT14001B  | ORT-TM07-301 | Microbacterium_oxydans                       | 99.79     | Actinomycetota | Microbacterium  | Microbacterium algeriense      | 12 |
| BF3KT14002AB | ORT-TM07-98  | Granulicatella_adiacens                      | 99.72     | Bacillota      | Granulicatella  | Granulicatella sp001058355     | 18 |
| BF3KT14003AB | ORT-TM07-99  | Streptococcus_parasanguinis                  | 98.84     | Bacillota      | Streptococcus   | 0                              | 22 |
| BF3KT15001   | ORT-AM08-194 | Streptococcus_salivarius                     | 99.93     | Bacillota      | Streptococcus   | Streptococcus salivarius       | 4  |
| BF3KT15002   | ORT-AM08-195 | Streptococcus_oralis                         | 99.86     | Bacillota      | Streptococcus   | 0                              | 50 |
| BF3KT15003B  | ORT-AM08-219 | Lactococcus_garvieae                         | 100.00    | Bacillota      | Lactococcus     | Lactococcus garvieae           | 51 |
| BF3KT16001   | ORT-AF06-01  | Microbacterium_oxydans                       | 99.79     | Actinomycetota | Microbacterium  | Microbacterium algeriense      | 12 |
| GF3KA08002B  | ORS-AF03-49  | Actinomyces_naeslundii                       | 97.64     | Actinomycetota | Actinomyces     | Actinomyces oris               | 39 |
| GF3KA09001A  | ORS-AF04-127 | Streptococcus_cristatus                      | 99.72     | Bacillota      | Streptococcus   | Streptococcus cristatus_C      | 52 |
| GF3KA09003A  | ORS-AF04-129 | Streptococcus_parasanguinis                  | 99.84     | Bacillota      | Streptococcus   | Streptococcus parasanguinis    | 20 |
| GF3KA09004   | ORS-AF04-41  | Streptococcus_sanguinis                      | 99.79     | Bacillota      | Streptococcus   | Streptococcus sanguinis_H      | 3  |
| GF3KA09004A  | ORS-AF04-183 | Atopobium_parvulum                           | 99.72     | Actinomycetota | Lancefieldella  | 0                              | 2  |
| GF3KA09005   | ORS-AF04-42  | Streptococcus_mitis                          | 99.45     | Bacillota      | Streptococcus   | 0                              | 9  |
| GF3KA09006A  | ORS-AF04-234 | Streptococcus_parasanguinis                  | 98.50     | Bacillota      | Streptococcus   | Streptococcus parasanguinis_C  | 53 |
| GF3KA10002A  | ORS-AF05-14  | Streptococcus_salivarius                     | 99.86     | Bacillota      | Streptococcus   | Streptococcus salivarius       | 4  |
| GF3KA10003A  | ORS-AF05-15  | Streptococcus_salivarius                     | 99.85     | Bacillota      | Streptococcus   | Streptococcus salivarius       | 4  |
| GF3KA10004A  | ORS-AF05-16  | Streptococcus_salivarius                     | 99.86     | Bacillota      | Streptococcus   | Streptococcus salivarius       | 4  |
| GF3KA10006   | ORS-AF05-242 | Streptococcus_salivarius                     | 99.86     | Bacillota      | Streptococcus   | Streptococcus salivarius       | 4  |
| GF3KA10007A  | ORS-AF05-19  | Gemella_haemolysans                          | 98.03     | Bacillota      | Gemella         | Gemella haemolysans_B          | 49 |
| GF3KA11002A  | ORS-AM04-85  | Granulicatella_adiacens                      | 93.51     | Bacillota      | Granulicatella  | Granulicatella adiacens        | 23 |
| GF3KA12001   | ORS-AM05-121 | Streptococcus_salivarius                     | 94.62     | Bacillota      | Streptococcus   | Streptococcus salivarius       | 4  |
| GF3KA12002   | ORS-AM05-122 | Streptococcus_oralis                         | 99.72     | Bacillota      | Streptococcus   | Streptococcus oralis_B         | 31 |
| GF3KA12004   | ORS-AM05-124 | Corynebacterium_argentoratense               | 99.79     | Actinomycetota | Corynebacterium | Corynebacterium argentoratense | 54 |
| GF3KA12006AB | ORS-AM05-357 | Streptococcus_parasanguinis                  | 97.25     | Bacillota      | Streptococcus   | 0                              | 22 |
| GF3KA12007AB | ORS-AM05-485 | Streptococcus_rubneri                        | 99.51     | Bacillota      | Streptococcus   | Streptococcus rubneri          | 14 |
| GF3KA13001A  | ORS-TM06-89  | Streptococcus_cristatus                      | 99.65     | Bacillota      | Streptococcus   | Streptococcus cristatus        | 36 |
| GF3KA13002   | ORS-TM06-15  | Streptococcus_australis                      | 98.70     | Bacillota      | Streptococcus   | Streptococcus xiaochunlingii   | 56 |
| GF3KA13002A  | ORS-TM06-90  | Abiotrophia_defectiva                        | 99.45     | Bacillota      | Abiotrophia     | Abiotrophia sp001815865        | 55 |
| GF3KA13003   | ORS-TM06-16  | Actinomyces_naeslundii                       | 96.15     | Actinomycetota | Actinomyces     | Actinomyces oris_A             | 58 |
| GF3KA13003A  | ORS-TM06-91  | Granulicatella_elegans                       | 100.00    | Bacillota      | Granulicatella  | 0                              | 57 |
| GF3KA13005A  | ORS-TM06-93  | Granulicatella_adiacens                      | 99.72     | Bacillota      | Granulicatella  | 0                              | 18 |
| GF3KA13006   | ORS-TM06-240 | Rothia_mucilaginoso                          | 99.37     | Actinomycetota | Rothia          | Rothia mucilaginoso_B          | 59 |
| GF3KA13006A  | ORS-TM06-94  | Granulicatella_elegans                       | 100.00    | Bacillota      | Granulicatella  | 0                              | 57 |
| GF3KA13011A  | ORS-TM06-222 | Streptococcus_salivarius                     | 100.00    | Bacillota      | Streptococcus   | Streptococcus salivarius       | 4  |
| GF3KA14001AB | ORS-TM07-40  | Enterococcus_faecalis                        | 100.00    | Bacillota      | Enterococcus    | Enterococcus faecalis          | 21 |
| GF3KA15001A  | ORS-AM08-28  | Streptococcus_australis                      | 99.38     | Bacillota      | Streptococcus   | 0                              | 60 |
| GF3KA15003A  | ORS-AM08-30  | Atopobium_parvulum                           | 99.58     | Actinomycetota | Lancefieldella  | 0                              | 26 |
| GF3KA15005AB | ORS-AM08-168 | Streptococcus_parasanguinis                  | 99.86     | Bacillota      | Streptococcus   | Streptococcus parasanguinis    | 20 |
| GF3KA16003   | ORS-AF06-69  | Streptococcus_anginosus                      | 100.00    | Bacillota      | Streptococcus   | Streptococcus anginosus        | 61 |
| GF3KC09002A  | ODP-AF04-155 | Granulicatella_adiacens                      | 99.90     | Bacillota      | Granulicatella  | Granulicatella adiacens        | 23 |
| GF3KC09003   | ODP-AF04-78  | Rothia_mucilaginoso                          | 99.51     | Actinomycetota | Rothia          | Rothia mucilaginoso_A          | 41 |
| GF3KC09005A  | ODP-AF04-158 | Granulicatella_adiacens                      | 93.62     | Bacillota      | Granulicatella  | Granulicatella adiacens        | 23 |
| GF3KC09008A  | ODP-AF04-190 | Actinomyces_odontolyticus                    | 99.15     | Actinomycetota | Pauljensenia    | Pauljensenia odontolytica_A    | 27 |
| GF3KC10001A  | ODP-AF05-68  | Streptococcus_parasanguinis                  | 99.04     | Bacillota      | Streptococcus   | Streptococcus parasanguinis_C  | 53 |
| GF3KC10002A  | ODP-AF05-69  | Streptococcus_parasanguinis                  | 99.04     | Bacillota      | Streptococcus   | Streptococcus parasanguinis_C  | 53 |
| GF3KC11001A  | ODP-AM04-97  | Prevotella_veroralis                         | 97.93     | Bacteroidota   | Prevotella      | Prevotella sp000257925         | 62 |
| GF3KC11002A  | ODP-AM04-98  | Prevotella_histicola                         | 99.86     | Bacteroidota   | Prevotella      | Prevotella histicola           | 28 |
| GF3KC11003A  | ODP-AM04-99  | Atopobium_parvulum                           | 99.72     | Actinomycetota | Lancefieldella  | 0                              | 2  |
| GF3KC11005A  | ODP-AM04-101 | Atopobium_parvulum                           | 99.65     | Actinomycetota | Lancefieldella  | 0                              | 2  |
| GF3KC12001   | ODP-AM05-24  | Streptococcus_gordonii                       | 99.93     | Bacillota      | Streptococcus   | Streptococcus gordonii         | 63 |
| GF3KC12002   | ODP-AM05-25  | Streptococcus_mitis                          | 99.79     | Bacillota      | Streptococcus   | Streptococcus mitis_AZ         | 11 |
| GF3KC12002A  | ODP-AM05-415 | Streptococcus_sanguinis                      | 99.86     | Bacillota      | Streptococcus   | Streptococcus sanguinis_G      | 29 |
| GF3KC12002B  | ODP-AM05-306 | Neisseria_elongata                           | 99.58     | Pseudomonadota | Neisseria       | Neisseria elongata             | 64 |
| GF3KC12004B  | ODP-AM05-321 | Neisseria_cinerea                            | 98.56     | Pseudomonadota | Neisseria       | Neisseria subflava             | 15 |
| GF3KC12005AB | ODP-AM05-388 | Gemella_morbilloorum                         | 98.30     | Bacillota      | Gemella         | Gemella morbillorum            | 65 |
| GF3KC12006A  | ODP-AM05-419 | Actinomyces_odontolyticus                    | 99.29     | Actinomycetota | Pauljensenia    | Pauljensenia odontolytica_A    | 27 |
| GF3KC12007A  | ODP-AM05-420 | Actinomyces_johnsonii                        | 99.85     | Actinomycetota | Actinomyces     | Actinomyces johnsonii          | 66 |
| GF3KC12007AB | ODP-AM05-461 | Actinomyces_johnsonii                        | 99.09     | Actinomycetota | Actinomyces     | Actinomyces johnsonii          | 66 |
| GF3KC12010A  | ODP-AM05-423 | Leptotrichia_buccalis<br>/Lactococcus_lactis | 98.56/100 | Fusobacteriota | Leptotrichia    | Leptotrichia massiliensis      | 67 |
| GF3KC12011A  | ODP-AM05-501 | Streptococcus_sanguinis                      | 99.86     | Bacillota      | Streptococcus   | Streptococcus sanguinis_G      | 29 |
| GF3KC13001A  | ODP-TM06-148 | Streptococcus_rubneri                        | 96.28     | Bacillota      | Streptococcus   | 0                              | 68 |
| GF3KC13002A  | ODP-TM06-149 | Streptococcus_rubneri                        | 99.68     | Bacillota      | Streptococcus   | 0                              | 22 |
| GF3KC13003A  | ODP-TM06-150 | Streptococcus_rubneri                        | 99.62     | Bacillota      | Streptococcus   | 0                              | 68 |
| GF3KC14001A  | ODP-TM07-125 | Granulicatella_adiacens                      | 98.64     | Bacillota      | Granulicatella  | Granulicatella adiacens        | 34 |
| GF3KC14002   | ODP-TM07-288 | Microbacterium_oxydans                       | 99.79     | Actinomycetota | Microbacterium  | Microbacterium algeriense      | 12 |
| GF3KC14002AB | ODP-TM07-152 | Granulicatella_adiacens                      | 94.34     | Bacillota      | Granulicatella  | Granulicatella adiacens        | 34 |
| GF3KC15001A  | ODP-AM08-289 | Granulicatella_adiacens                      | 99.66     | Bacillota      | Granulicatella  | Granulicatella sp905371865     | 69 |
| GF3KC15002   | ODP-AM08-343 | Streptococcus_intermedius                    | 100.00    | Bacillota      | Streptococcus   | Streptococcus intermedius      | 70 |
| GF3KC15004A  | ODP-AM08-292 | Streptococcus_sanguinis                      | 99.79     | Bacillota      | Streptococcus   | Streptococcus sanguinis_H      | 3  |
| GF3KC15006B  | ODP-AM08-257 | Actinomyces_naeslundii                       | 96.96     | Actinomycetota | Actinomyces     | Actinomyces oris_A             | 58 |
| GF3KC15009A  | ODP-AM08-297 | Abiotrophia_defectiva                        | 99.59     | Bacillota      | Abiotrophia     | Abiotrophia defectiva          | 37 |
| GF3KT09001A  | ORT-AF04-117 | Streptococcus_parasanguinis                  | 99.04     | Bacillota      | Streptococcus   | Streptococcus parasanguinis_C  | 53 |
| GF3KT09002A  | ORT-AF04-118 | Streptococcus_parasanguinis                  | 99.04     | Bacillota      | Streptococcus   | Streptococcus parasanguinis_C  | 53 |



|              |              |                                     |           |                |                     |                                |    |
|--------------|--------------|-------------------------------------|-----------|----------------|---------------------|--------------------------------|----|
| GF3KT09003A  | ORT-AF04-170 | Atopobium_parvulum                  | 99.72     | Actinomycetota | Lancefieldella      | 0                              | 2  |
| GF3KT09005   | ORT-AF04-192 | Streptococcus_salivarius            | 99.86     | Bacillota      | Streptococcus       | Streptococcus salivarius       | 4  |
| GF3KT09005A  | ORT-AF04-217 | Streptococcus_parasanguinis         | 99.21     | Bacillota      | Streptococcus       | Streptococcus parasanguinis_D  | 71 |
| GF3KT10001A  | ORT-AF05-103 | Streptococcus_parasanguinis         | 99.84     | Bacillota      | Streptococcus       | Streptococcus parasanguinis    | 20 |
| GF3KT10002A  | ORT-AF05-104 | Atopobium_parvulum                  | 99.72     | Actinomycetota | Lancefieldella      | 0                              | 2  |
| GF3KT10003A  | ORT-AF05-105 | Atopobium_parvulum                  | 99.72     | Actinomycetota | Lancefieldella      | 0                              | 2  |
| GF3KT10004A  | ORT-AF05-106 | Streptococcus_salivarius            | 99.86     | Bacillota      | Streptococcus       | Streptococcus salivarius       | 4  |
| GF3KT10006A  | ORT-AF05-108 | Streptococcus_salivarius            | 99.86     | Bacillota      | Streptococcus       | Streptococcus salivarius       | 4  |
| GF3KT11001   | ORT-AM04-05  | Streptococcus_infantis              | 99.52     | Bacillota      | Streptococcus       | 0                              | 72 |
| GF3KT11002   | ORT-AM04-06  | Rothia_mucilaginoso                 | 99.58     | Actinomycetota | Rothia              | Rothia mucilaginoso_B          | 59 |
| GF3KT11003   | ORT-AM04-07  | Streptococcus_infantis              | 99.52     | Bacillota      | Streptococcus       | Streptococcus infantis_H       | 73 |
| GF3KT11003A  | ORT-AM04-127 | #N/A                                | #N/A      | Bacillota      | Streptococcus       | Streptococcus gordonii         | 63 |
| GF3KT12001   | ORT-AM05-05  | Streptococcus_timonensis            | 99.86     | Bacillota      | Streptococcus       | 0                              | 74 |
| GF3KT12002AB | ORT-AM05-94  | Streptococcus_mitis                 | 99.79     | Bacillota      | Streptococcus       | Streptococcus mitis_AZ         | 11 |
| GF3KT12002B  | ORT-AM05-110 | Rothia_mucilaginoso                 | 99.51     | Actinomycetota | Rothia              | Rothia mucilaginoso_B          | 59 |
| GF3KT12003AB | ORT-AM05-95  | Lachnoanaerobaculum_umeaense        | 77.58     | Bacillota      | Lachnoanaerobaculum | 0                              | 75 |
| GF3KT12004A  | ORT-AM05-449 | Streptococcus_timonensis            | 99.86     | Bacillota      | Streptococcus       | Streptococcus mitis_BG         | 16 |
| GF3KT12004AB | ORT-AM05-96  | Granulicatella_adiacens             | 99.66     | Bacillota      | Granulicatella      | 0                              | 25 |
| GF3KT12005A  | ORT-AM05-450 | Streptococcus_australis             | 98.43     | Bacillota      | Streptococcus       | Streptococcus koreensis        | 48 |
| GF3KT12006AB | ORT-AM05-288 | Granulicatella_adiacens             | 99.72     | Bacillota      | Granulicatella      | 0                              | 25 |
| GF3KT12008A  | ORT-AM05-520 | Actinomyces_odontolyticus           | 99.22     | Actinomycetota | Pauljensenia        | Pauljensenia sp018375675       | 76 |
| GF3KT12009AB | ORT-AM05-455 | Gemella_sanguinis                   | 99.86     | Bacillota      | Gemella             | Gemella sanguinis              | 17 |
| GF3KT13001A  | ORT-TM06-169 | Streptococcus_rubneri               | 96.47     | Bacillota      | Streptococcus       | 0                              | 68 |
| GF3KT13002A  | ORT-TM06-170 | Granulicatella_adiacens             | 99.59     | Bacillota      | Granulicatella      | 0                              | 77 |
| GF3KT13003   | ORT-TM06-66  | Streptococcus_parasanguinis         | 99.35     | Bacillota      | Streptococcus       | Streptococcus sp900766505      | 6  |
| GF3KT14001   | ORT-TM07-178 | Microbacterium_oxydans              | 99.79     | Actinomycetota | Microbacterium      | Microbacterium algeriense      | 12 |
| GF3KT15003   | ORT-AM08-200 | Streptococcus_salivarius            | 99.93     | Bacillota      | Streptococcus       | Streptococcus salivarius       | 4  |
| GF3KT15004B  | ORT-AM08-223 | Rothia_mucilaginoso                 | 99.51     | Actinomycetota | Rothia              | Rothia mucilaginoso            | 78 |
| GF3KT16003   | ORT-AF06-92  | Rothia_mucilaginoso                 | 99.58     | Actinomycetota | Rothia              | Rothia mucilaginoso_B          | 59 |
| HF3KA08001A  | ORS-AF03-141 | Streptococcus_mitis                 | 99.18     | Bacillota      | Streptococcus       | Streptococcus oralis_Z         | 79 |
| HF3KA08001B  | ORS-AF03-52  | Rothia_dentocarioso                 | 99.93     | Actinomycetota | Rothia              | Rothia dentocarioso            | 13 |
| HF3KA08002A  | ORS-AF03-142 | Enterococcus_casseliflavus          | 99.79     | Bacillota      | Enterococcus_D      | Enterococcus_D casseliflavus   | 1  |
| HF3KA08006B  | ORS-AF03-251 | Actinomyces_naeslundii              | 96.76     | Actinomycetota | Actinomyces         | Actinomyces oris               | 39 |
| HF3KA09001A  | ORS-AF04-136 | Streptococcus_salivarius            | 99.86     | Bacillota      | Streptococcus       | Streptococcus salivarius       | 4  |
| HF3KA09002A  | ORS-AF04-137 | Streptococcus_salivarius            | 99.86     | Bacillota      | Streptococcus       | Streptococcus salivarius       | 4  |
| HF3KA09005A  | ORS-AF04-140 | Granulicatella_adiacens             | 99.80     | Bacillota      | Granulicatella      | Granulicatella adiacens        | 23 |
| HF3KA10004A  | ORS-AF05-23  | Streptococcus_salivarius            | 100.00    | Bacillota      | Streptococcus       | Streptococcus salivarius       | 4  |
| HF3KA10005A  | ORS-AF05-24  | Streptococcus_salivarius            | 96.66     | Bacillota      | Streptococcus       | Streptococcus salivarius       | 4  |
| HF3KA11001A  | ORS-AM04-86  | Streptococcus_sanguinis             | 99.79     | Bacillota      | Streptococcus       | Streptococcus sanguinis_H      | 3  |
| HF3KA12001   | ORS-AM05-127 | Corynebacterium_argentoratense      | 99.79     | Actinomycetota | Corynebacterium     | Corynebacterium argentoratense | 54 |
| HF3KA12001A  | ORS-AM05-172 | Corynebacterium_argentoratense      | 99.79     | Actinomycetota | Corynebacterium     | Corynebacterium argentoratense | 54 |
| HF3KA12002   | ORS-AM05-128 | Streptococcus_constellatus          | 99.12     | Bacillota      | Streptococcus       | Streptococcus constellatus     | 46 |
| HF3KA12002AB | ORS-AM05-193 | #N/A                                | #N/A      | Bacillota      | Streptococcus       | Streptococcus koreensis        | 48 |
| HF3KA12003AB | ORS-AM05-194 | Streptococcus_mitis                 | 99.72     | Bacillota      | Streptococcus       | Streptococcus mitis_AZ         | 11 |
| HF3KA12004B  | ORS-AM05-167 | Corynebacterium_argentoratense      | 99.79     | Actinomycetota | Corynebacterium     | Corynebacterium argentoratense | 54 |
| HF3KA12005AB | ORS-AM05-196 | Rothia_dentocarioso                 | 99.93     | Actinomycetota | Rothia              | Rothia dentocarioso            | 13 |
| HF3KA12006A  | ORS-AM05-374 | Capnocytophaga_leadbetteri          | 99.09     | Bacteroidota   | Capnocytophaga      | Capnocytophaga leadbetteri     | 81 |
| HF3KA12006AB | ORS-AM05-358 | Fusobacterium_periodonticum         | 99.71     | Fusobacteriota | Fusobacterium       | Fusobacterium periodonticum_D  | 80 |
| HF3KA12009AB | ORS-AM05-381 | Solobacterium_moorei                | 99.51     | Bacillota      | Bulleidia           | Bulleidia sp015256775          | 82 |
| HF3KA13001   | ORS-TM06-19  | Rothia_dentocarioso                 | 99.93     | Actinomycetota | Rothia              | Rothia dentocarioso            | 13 |
| HF3KA13002A  | ORS-TM06-96  | Streptococcus_cristatus             | 99.52     | Bacillota      | Streptococcus       | Streptococcus cristatus_G      | 83 |
| HF3KA13003A  | ORS-TM06-97  | Gemella_sanguinis                   | 99.86     | Bacillota      | Gemella             | Gemella sanguinis              | 17 |
| HF3KA13005A  | ORS-TM06-99  | Granulicatella_adiacens             | 99.93     | Bacillota      | Granulicatella      | Granulicatella adiacens        | 23 |
| HF3KA13006A  | ORS-TM06-100 | Gemella_haemolysans                 | 99.39     | Bacillota      | Gemella             | 0                              | 84 |
| HF3KA13012A  | ORS-TM06-224 | Streptococcus_salivarius            | 99.93     | Bacillota      | Streptococcus       | Streptococcus salivarius       | 4  |
| HF3KA13014A  | ORS-TM06-226 | Veillonella_dispar                  | 99.73     | Bacillota      | Veillonella         | Veillonella sp902834965        | 19 |
| HF3KA14001   | ORS-TM07-219 | Streptococcus_mitis                 | 99.65     | Bacillota      | Streptococcus       | 0                              | 85 |
| HF3KA14004A  | ORS-TM07-11  | Enterococcus_faecalis               | 100.00    | Bacillota      | Enterococcus        | Enterococcus faecalis          | 21 |
| HF3KA15001A  | ORS-AM08-152 | Actinomyces_odontolyticus           | 98.93     | Actinomycetota | Pauljensenia        | Pauljensenia sp902373545       | 45 |
| HF3KA15001AB | ORS-AM08-56  | Streptococcus_anginosus             | 99.66     | Bacillota      | Streptococcus       | Streptococcus anginosus        | 61 |
| HF3KA15004AB | ORS-AM08-171 | Granulicatella_adiacens             | 99.72     | Bacillota      | Granulicatella      | Granulicatella sp001058355     | 18 |
| HF3KA15004B  | ORS-AM08-101 | Rothia_mucilaginoso                 | 99.44     | Actinomycetota | Rothia              | Rothia mucilaginoso            | 78 |
| HF3KA16008   | ORS-AF06-121 | Streptococcus_timonensis            | 98.84     | Bacillota      | Streptococcus       | 0                              | 86 |
| HF3KA16011   | ORS-AF06-159 | Streptococcus_rubneri               | 99.38     | Bacillota      | Streptococcus       | Streptococcus xiaochunlingii   | 5  |
| HF3KC09003   | ODP-AF04-83  | #N/A                                | #N/A      | Bacillota      | Streptococcus       | 0                              | 8  |
| HF3KC12001AB | ODP-AM05-262 | Streptococcus_constellatus          | 99.12     | Bacillota      | Streptococcus       | Streptococcus constellatus     | 46 |
| HF3KC12002A  | ODP-AM05-425 | Fusobacterium_nucleatum             | 99.93     | Fusobacteriota | Fusobacterium       | Fusobacterium polymorphum      | 87 |
| HF3KC12002AB | ODP-AM05-263 | Streptococcus_oralis                | 99.79     | Bacillota      | Streptococcus       | Streptococcus oralis_Y         | 35 |
| HF3KC12003AB | ODP-AM05-390 | Actinomyces_oris/Lactococcus_lactis | 99.34/100 | Actinomycetota | Actinomyces         | Actinomyces oris               | 39 |
| HF3KC12004AB | ODP-AM05-456 | Lachnoanaerobaculum_umeaense        | 94.53     | Bacillota      | Lachnoanaerobaculum | Lachnoanaerobaculum gingivalis | 88 |
| HF3KC12005A  | ODP-AM05-463 | Capnocytophaga_sputigena            | 99.79     | Bacteroidota   | Capnocytophaga      | Capnocytophaga sputigena       | 90 |
| HF3KC12005AB | ODP-AM05-457 | Streptococcus_pseudopneumoniae      | 99.79     | Bacillota      | Streptococcus       | Streptococcus symci            | 89 |
| HF3KC12005B  | ODP-AM05-322 | Rothia_mucilaginoso                 | 99.37     | Actinomycetota | Rothia              | Rothia sp015265375             | 91 |
| HF3KC12006AB | ODP-AM05-458 | Streptococcus_pseudopneumoniae      | 99.79     | Bacillota      | Streptococcus       | Streptococcus symci            | 89 |
| HF3KC12007   | ODP-AM05-296 | Rothia_dentocarioso                 | 99.93     | Actinomycetota | Rothia              | Rothia dentocarioso            | 13 |
| HF3KC13001   | ODP-TM06-47  | Streptococcus_gordonii              | 99.66     | Bacillota      | Streptococcus       | Streptococcus gordonii         | 63 |
| HF3KC13001A  | ODP-TM06-151 | Streptococcus_salivarius            | 100.00    | Bacillota      | Streptococcus       | Streptococcus salivarius       | 4  |
| HF3KC13002A  | ODP-TM06-152 | Actinomyces_odontolyticus           | 99.19     | Actinomycetota | Pauljensenia        | Pauljensenia odontolytica_A    | 27 |
| HF3KC13003A  | ODP-TM06-153 | Gemella_haemolysans                 | 99.79     | Bacillota      | Gemella             | 0                              | 84 |
| HF3KC13005A  | ODP-TM06-155 | Granulicatella_adiacens             | 99.79     | Bacillota      | Granulicatella      | Granulicatella adiacens        | 23 |
| HF3KC14001AB | ODP-TM07-155 | Granulicatella_adiacens             | 99.93     | Bacillota      | Granulicatella      | Granulicatella adiacens        | 23 |
| HF3KC14002   | ODP-TM07-290 | Microbacterium_oxydans              | 99.79     | Actinomycetota | Microbacterium      | Microbacterium algeriense      | 12 |
| HF3KC14003AB | ODP-TM07-157 | Veillonella_dispar                  | 99.46     | Bacillota      | Veillonella         | Veillonella parvula_A          | 92 |
| HF3KC15001AB | ODP-AM08-403 | Granulicatella_adiacens             | 99.79     | Bacillota      | Granulicatella      | Granulicatella adiacens        | 23 |
| HF3KC15002   | ODP-AM08-350 | Streptococcus_salivarius            | 100.00    | Bacillota      | Streptococcus       | Streptococcus salivarius       | 4  |
| HF3KC15002A  | ODP-AM08-302 | Streptococcus_salivarius            | 100.00    | Bacillota      | Streptococcus       | Streptococcus salivarius       | 4  |

|              |              |                                                  |           |                |                 |                                   |     |
|--------------|--------------|--------------------------------------------------|-----------|----------------|-----------------|-----------------------------------|-----|
| HF3KC15004A  | ODP-AM08-304 | Gemella_sanguinis                                | 99.93     | Bacillota      | Gemella         | Gemella sanguinis                 | 17  |
| HF3KC15009A  | ODP-AM08-392 | Fusobacterium_periodonticum                      | 99.85     | Fusobacteriata | Fusobacterium   | Fusobacterium periodonticum_D     | 80  |
| HF3KC15010A  | ODP-AM08-393 | Gemella_morbilloorum                             | 99.86     | Bacillota      | Gemella         | Gemella morbillorum               | 65  |
| HF3KC16002B  | ODP-AF06-108 | Streptococcus_mitis                              | 97.07     | Bacillota      | Streptococcus   | Streptococcus oralis_G            | 93  |
| HF3KT08002   | ORT-AF03-76  | Gemella_haemolysans                              | 99.66     | Bacillota      | Gemella         | 0                                 | 94  |
| HF3KT08003A  | ORT-AF03-129 | Streptococcus_parasanguinis                      | 99.32     | Bacillota      | Streptococcus   | Streptococcus parasanguinis       | 20  |
| HF3KT09001   | ORT-AF04-11  | Streptococcus_salivarius                         | 99.86     | Bacillota      | Streptococcus   | Streptococcus salivarius          | 4   |
| HF3KT09002A  | ORT-AF04-173 | Prevotella_histicola                             | 99.62     | Bacteroidota   | Prevotella      | Prevotella histicola              | 28  |
| HF3KT09003A  | ORT-AF04-221 | Streptococcus_parasanguinis                      | 99.18     | Bacillota      | Streptococcus   | Streptococcus sp900766505         | 6   |
| HF3KT10001A  | ORT-AF05-109 | Enterococcus_faecalis                            | 100.00    | Bacillota      | Enterococcus    | Enterococcus faecalis             | 21  |
| HF3KT10005A  | ORT-AF05-113 | Granulicatella_adiacens                          | 99.72     | Bacillota      | Granulicatella  | 0                                 | 95  |
| HF3KT10010A  | ORT-AF05-230 | Atopobium_parvulum                               | 99.72     | Actinomycetota | Lancefieldella  | 0                                 | 96  |
| HF3KT11004   | ORT-AM04-12  | Gemella_haemolysans                              | 99.39     | Bacillota      | Gemella         | Gemella haemolysans_B             | 49  |
| HF3KT12001A  | ORT-AM05-89  | Streptococcus_oralis                             | 99.52     | Bacillota      | Streptococcus   | Streptococcus oralis_Y            | 35  |
| HF3KT12001B  | ORT-AM05-54  | Neisseria_macacae                                | 99.52     | Pseudomonadota | Neisseria       | Neisseria sicca_A                 | 44  |
| HF3KT12002   | ORT-AM05-111 | Neisseria_cinerea                                | 97.94     | Pseudomonadota | Neisseria       | Neisseria flavescens_B            | 15  |
| HF3KT12003   | ORT-AM05-314 | Neisseria_elongata                               | 99.79     | Pseudomonadota | Neisseria       | Neisseria elongata                | 64  |
| HF3KT12003AB | ORT-AM05-235 | Granulicatella_adiacens                          | 99.66     | Bacillota      | Granulicatella  | 0                                 | 25  |
| HF3KT12004   | ORT-AM05-320 | Corynebacterium_argentoratense                   | 99.79     | Actinomycetota | Corynebacterium | Corynebacterium argentoratense    | 54  |
| HF3KT12004A  | ORT-AM05-507 | Streptococcus_salivarius                         | 100.00    | Bacillota      | Streptococcus   | Streptococcus salivarius          | 4   |
| HF3KT12004B  | ORT-AM05-317 | Neisseria_elongata                               | 99.79     | Pseudomonadota | Neisseria       | Neisseria elongata                | 64  |
| HF3KT13001A  | ORT-TM06-175 | Streptococcus_salivarius                         | 100.00    | Bacillota      | Streptococcus   | Streptococcus salivarius          | 4   |
| HF3KT13002A  | ORT-TM06-176 | Granulicatella_adiacens                          | 99.72     | Bacillota      | Granulicatella  | 0                                 | 18  |
| HF3KT13003A  | ORT-TM06-177 | Actinomyces_odontolyticus                        | 99.22     | Actinomycetota | Pauljensenia    | Pauljensenia sp902373545          | 45  |
| HF3KT14001   | ORT-TM07-185 | Streptococcus_rubneri                            | 99.51     | Bacillota      | Streptococcus   | 0                                 | 98  |
| HF3KT14001A  | ORT-TM07-82  | Actinomyces_odontolyticus                        | 98.93     | Actinomycetota | Pauljensenia    | Pauljensenia sp018382595          | 97  |
| HF3KT14002B  | ORT-TM07-206 | Rothia_mucilaginoso                              | 99.37     | Actinomycetota | Rothia          | Rothia mucilaginoso_B             | 59  |
| HF3KT15001AB | ORT-AM08-461 | Granulicatella_adiacens                          | 99.72     | Bacillota      | Granulicatella  | Granulicatella sp001058355        | 18  |
| HF3KT16001   | ORT-AF06-04  | Streptococcus_australis                          | 98.57     | Bacillota      | Streptococcus   | Streptococcus koreensis           | 48  |
| HF3KT16004   | ORT-AF06-93  | Microbacterium_oxydans                           | 99.79     | Actinomycetota | Microbacterium  | Microbacterium algeriense         | 12  |
| HF3KT16005   | ORT-AF06-141 | Rothia_mucilaginoso                              | 99.44     | Actinomycetota | Rothia          | Rothia sp001808955                | 78  |
| IF3KA08003BA | ORS-AF03-170 | Streptococcus_mitis                              | 99.65     | Bacillota      | Streptococcus   | Streptococcus mitis_AI            | 89  |
| IF3KA09001BA | ORS-AF04-147 | Actinomyces_odontolyticus                        | 99.39     | Actinomycetota | Pauljensenia    | Pauljensenia sp001064145          | 42  |
| IF3KA09003BA | ORS-AF04-237 | Actinomyces_odontolyticus                        | 99.08     | Actinomycetota | Pauljensenia    | Pauljensenia sp001064145          | 42  |
| IF3KA09004A  | ORS-AF04-133 | Atopobium_parvulum                               | 99.72     | Actinomycetota | Lancefieldella  | 0                                 | 2   |
| IF3KA09005A  | ORS-AF04-134 | Atopobium_parvulum                               | 99.72     | Actinomycetota | Lancefieldella  | 0                                 | 2   |
| IF3KA11001   | ORS-AM04-35  | Streptococcus_salivarius                         | 100.00    | Bacillota      | Streptococcus   | Streptococcus salivarius          | 4   |
| IF3KA12001AB | ORS-AM05-197 | #N/A                                             | #N/A      | Bacillota      | Streptococcus   | 0                                 | 85  |
| IF3KA12002AB | ORS-AM05-198 | Fusobacterium_periodonticum                      | 99.85     | Fusobacteriata | Fusobacterium   | Fusobacterium pseudoperiodonticum | 80  |
| IF3KA12002B  | ORS-AM05-342 | Staphylococcus_hominis                           | 99.72     | Bacillota      | Staphylococcus  | Staphylococcus hominis            | 99  |
| IF3KA12003   | ORS-AM05-133 | Streptococcus_mitis                              | 99.48     | Bacillota      | Streptococcus   | 0                                 | 100 |
| IF3KA12003A  | ORS-AM05-177 | Streptococcus_constellatus                       | 99.12     | Bacillota      | Streptococcus   | Streptococcus constellatus        | 46  |
| IF3KA12004AB | ORS-AM05-382 | Lactococcus_lactis<br>/Actinomyces_odontolyticus | 100/99.27 | Actinomycetota | Pauljensenia    | Pauljensenia sp902373545          | 45  |
| IF3KA12007A  | ORS-AM05-481 | Streptococcus_pseudopneumoniae                   | 96.86     | Bacillota      | Streptococcus   | 0                                 | 101 |
| IF3KA12008AB | ORS-AM05-490 | Streptococcus_rubneri                            | 99.51     | Bacillota      | Streptococcus   | Streptococcus rubneri             | 14  |
| IF3KA12009AB | ORS-AM05-491 | Streptococcus_oralis                             | 99.79     | Bacillota      | Streptococcus   | Streptococcus oralis_C            | 35  |
| IF3KA13001   | ORS-TM06-24  | Streptococcus_salivarius                         | 99.93     | Bacillota      | Streptococcus   | Streptococcus salivarius          | 4   |
| IF3KA13001B  | ORS-TM06-04  | Rothia_mucilaginoso                              | 99.37     | Actinomycetota | Rothia          | Rothia mucilaginoso_B             | 59  |
| IF3KA13002A  | ORS-TM06-104 | Abiotrophia_defectiva                            | 99.86     | Bacillota      | Abiotrophia     | Abiotrophia defectiva             | 37  |
| IF3KA13002B  | ORS-TM06-05  | Streptococcus_anginosus                          | 97.09     | Bacillota      | Streptococcus   | Streptococcus anginosus           | 61  |
| IF3KA13003A  | ORS-TM06-105 | Streptococcus_oralis                             | 99.45     | Bacillota      | Streptococcus   | 0                                 | 102 |
| IF3KA13003B  | ORS-TM06-06  | Streptococcus_gordonii                           | 99.66     | Bacillota      | Streptococcus   | Streptococcus gordonii            | 63  |
| IF3KA13004   | ORS-TM06-27  | Streptococcus_gordonii                           | 99.66     | Bacillota      | Streptococcus   | Streptococcus gordonii            | 63  |
| IF3KA13004A  | ORS-TM06-106 | Granulicatella_adiacens                          | 99.72     | Bacillota      | Granulicatella  | Granulicatella sp015264885        | 103 |
| IF3KA13004B  | ORS-TM06-07  | Streptococcus_anginosus                          | 99.59     | Bacillota      | Streptococcus   | Streptococcus anginosus_C         | 104 |
| IF3KA13005A  | ORS-TM06-107 | Actinomyces_odontolyticus                        | 98.37     | Actinomycetota | Pauljensenia    | Pauljensenia sp000466265          | 105 |
| IF3KA13005B  | ORS-TM06-08  | Rothia_mucilaginoso                              | 99.37     | Actinomycetota | Rothia          | Rothia sp015265375                | 91  |
| IF3KA13007A  | ORS-TM06-109 | Granulicatella_elegans                           | 100.00    | Bacillota      | Granulicatella  | 0                                 | 57  |
| IF3KA13008A  | ORS-TM06-110 | Gemella_haemolysans                              | 99.72     | Bacillota      | Gemella         | 0                                 | 84  |
| IF3KA13016A  | ORS-TM06-231 | Streptococcus_oralis                             | 99.22     | Bacillota      | Streptococcus   | Streptococcus sp004166885         | 98  |
| IF3KA14004AB | ORS-TM07-51  | Streptococcus_salivarius                         | 100.00    | Bacillota      | Streptococcus   | Streptococcus salivarius          | 4   |
| IF3KA14005A  | ORS-TM07-18  | Streptococcus_infantis                           | 99.45     | Bacillota      | Streptococcus   | Streptococcus timonensis          | 16  |
| IF3KA14005AB | ORS-TM07-52  | Streptococcus_rubneri                            | 99.45     | Bacillota      | Streptococcus   | Streptococcus xiaochunlingii      | 5   |
| IF3KA14005B  | ORS-TM07-240 | Streptococcus_oralis                             | 99.84     | Bacillota      | Streptococcus   | Streptococcus mitis_AZ            | 11  |
| IF3KA14006A  | ORS-TM07-19  | Streptococcus_sanguinis                          | 99.79     | Bacillota      | Streptococcus   | Streptococcus sanguinis_H         | 3   |
| IF3KA14006B  | ORS-TM07-241 | Streptococcus_sinensis                           | 99.66     | Bacillota      | Streptococcus   | Streptococcus sinensis            | 24  |
| IF3KA14008A  | ORS-TM07-21  | Streptococcus_rubneri                            | 99.86     | Bacillota      | Streptococcus   | Streptococcus rubneri             | 14  |
| IF3KA15001   | ORS-AM08-15  | Streptococcus_salivarius                         | 99.93     | Bacillota      | Streptococcus   | Streptococcus salivarius          | 4   |
| IF3KA15001A  | ORS-AM08-32  | Streptococcus_anginosus                          | 99.66     | Bacillota      | Streptococcus   | Streptococcus anginosus           | 61  |
| IF3KA15001AB | ORS-AM08-59  | Streptococcus_anginosus                          | 99.66     | Bacillota      | Streptococcus   | Streptococcus anginosus           | 61  |
| IF3KA15002A  | ORS-AM08-33  | Atopobium_parvulum                               | 99.65     | Actinomycetota | Lancefieldella  | Lancefieldella sp000564995        | 26  |
| IF3KA15002AB | ORS-AM08-60  | Streptococcus_oralis                             | 98.77     | Bacillota      | Streptococcus   | Streptococcus xiaochunlingii      | 5   |
| IF3KA15003A  | ORS-AM08-34  | Granulicatella_adiacens                          | 99.72     | Bacillota      | Granulicatella  | Granulicatella sp001058355        | 106 |
| IF3KA15006A  | ORS-AM08-153 | Actinomyces_odontolyticus                        | 98.59     | Actinomycetota | Pauljensenia    | Pauljensenia sp902373545          | 45  |
| IF3KA15007A  | ORS-AM08-154 | Actinomyces_odontolyticus                        | 99.29     | Actinomycetota | Pauljensenia    | Pauljensenia sp018382595          | 97  |
| IF3KA15007B  | ORS-AM08-119 | Streptococcus_salivarius                         | 100.00    | Bacillota      | Streptococcus   | Streptococcus salivarius          | 4   |
| IF3KC09001   | ODP-AF04-87  | Streptococcus_salivarius                         | 100.00    | Bacillota      | Streptococcus   | Streptococcus salivarius          | 4   |
| IF3KC09001A  | ODP-AF04-161 | Granulicatella_adiacens                          | 93.51     | Bacillota      | Granulicatella  | Granulicatella adiacens           | 23  |
| IF3KC09002   | ODP-AF04-88  | Streptococcus_mitis                              | 99.45     | Bacillota      | Streptococcus   | 0                                 | 9   |
| IF3KC10005A  | ODP-AF05-77  | Streptococcus_salivarius                         | 99.82     | Bacillota      | Streptococcus   | Streptococcus salivarius          | 4   |
| IF3KC12001AB | ODP-AM05-264 | Streptococcus_mitis                              | 99.79     | Bacillota      | Streptococcus   | Streptococcus mitis_AZ            | 11  |
| IF3KC12001B  | ODP-AM05-72  | Streptococcus_salivarius                         | 100.00    | Bacillota      | Streptococcus   | Streptococcus salivarius          | 4   |
| IF3KC12002   | ODP-AM05-34  | Streptococcus_anginosus                          | 99.52     | Bacillota      | Streptococcus   | Streptococcus anginosus           | 61  |
| IF3KC12002AB | ODP-AM05-265 | Streptococcus_anginosus                          | 99.52     | Bacillota      | Streptococcus   | Streptococcus anginosus           | 61  |
| IF3KC12002B  | ODP-AM05-73  | Streptococcus_gordonii                           | 99.93     | Bacillota      | Streptococcus   | Streptococcus gordonii            | 63  |
| IF3KC12003AB | ODP-AM05-266 | Streptococcus_constellatus                       | 99.79     | Bacillota      | Streptococcus   | Streptococcus constellatus        | 46  |

|               |              |                                                  |             |                |                    |                                   |     |
|---------------|--------------|--------------------------------------------------|-------------|----------------|--------------------|-----------------------------------|-----|
| IF3KC12004    | ODP-AM05-444 | Rothia_aeria                                     | 98.68       | Actinomycetota | Rothia             | Rothia aeria                      | 32  |
| IF3KC12004A   | ODP-AM05-243 | Streptococcus_sanguinis                          | 99.65       | Bacillota      | Streptococcus      | Streptococcus sanguinis_A         | 29  |
| IF3KC12004AB  | ODP-AM05-267 | Streptococcus_mitis                              | 99.79       | Bacillota      | Streptococcus      | Streptococcus mitis_AZ            | 11  |
| IF3KC12006A   | ODP-AM05-503 | Streptococcus_gordonii                           | 100.00      | Bacillota      | Streptococcus      | Streptococcus gordonii            | 63  |
| IF3KC12006AB  | ODP-AM05-269 | Actinomyces_odontolyticus                        | 99.29       | Actinomycetota | Pauljensenia       | Pauljensenia odontolytica_A       | 27  |
| IF3KC12007A   | ODP-AM05-533 | Actinomyces_naeslundii                           | 99.52       | Actinomycetota | Actinomyces        | Actinomyces naeslundii            | 33  |
| IF3KC13001A   | ODP-TM06-159 | Streptococcus_oralis                             | 99.45       | Bacillota      | Streptococcus      | 0                                 | 102 |
| IF3KC13003    | ODP-TM06-50  | Streptococcus_gordonii                           | 99.92       | Bacillota      | Streptococcus      | Streptococcus gordonii            | 63  |
| IF3KC13006A   | ODP-TM06-164 | Streptococcus_sanguinis                          | 100.00      | Bacillota      | Streptococcus      | Streptococcus sanguinis_H         | 3   |
| IF3KC14001    | ODP-TM07-201 | Microbacterium_oxydans                           | 99.79       | Actinomycetota | Microbacterium     | Microbacterium algeriense         | 12  |
| IF3KC14001A   | ODP-TM07-131 | Granulicatella_adiacens                          | 98.64       | Bacillota      | Granulicatella     | 0                                 | 34  |
| IF3KC14001AB  | ODP-TM07-158 | Streptococcus_cristatus                          | 99.72       | Bacillota      | Streptococcus      | Streptococcus cristatus           | 36  |
| IF3KC14002AB  | ODP-TM07-159 | Streptococcus_rubneri                            | 99.51       | Bacillota      | Streptococcus      | Streptococcus xiaochunlingii      | 5   |
| IF3KC14004A   | ODP-TM07-134 | Veillonella_parvula                              | 99.32       | Bacillota      | Veillonella        | Veillonella parvula_A             | 92  |
| IF3KC14005    | ODP-TM07-296 | Microbacterium_oxydans                           | 99.79       | Actinomycetota | Microbacterium     | Microbacterium algeriense         | 12  |
| IF3KC14005A   | ODP-TM07-173 | Microbacterium_oxydans                           | 99.79       | Actinomycetota | Microbacterium     | Microbacterium algeriense         | 12  |
| IF3KC14005AB  | ODP-TM07-162 | Streptococcus_mitis                              | 99.45       | Bacillota      | Streptococcus      | Streptococcus oralis              | 107 |
| IF3KC14006A   | ODP-TM07-271 | Streptococcus_cristatus                          | 99.72       | Bacillota      | Streptococcus      | Streptococcus cristatus           | 36  |
| IF3KC14007A   | ODP-TM07-272 | Streptococcus_mitis                              | 99.45       | Bacillota      | Streptococcus      | Streptococcus oralis              | 107 |
| IF3KC15002A   | ODP-AM08-308 | Streptococcus_gordonii                           | 99.66       | Bacillota      | Streptococcus      | Streptococcus gordonii            | 63  |
| IF3KC15003A   | ODP-AM08-396 | Abiotrophia_defectiva                            | 99.66       | Bacillota      | Abiotrophia        | Abiotrophia defectiva             | 37  |
| IF3KC15005    | ODP-AM08-466 | Rothia_mucilaginoso                              | 99.37       | Actinomycetota | Rothia             | 0                                 | 109 |
| IF3KC15005A   | ODP-AM08-398 | Streptococcus_oralis                             | 99.72       | Bacillota      | Streptococcus      | 0                                 | 108 |
| IF3KC16001B   | ODP-AF06-62  | Streptococcus_rubneri                            | 98.76       | Bacillota      | Streptococcus      | Streptococcus sp004166885         | 98  |
| IF3KC16002    | ODP-AF06-103 | Granulicatella_adiacens                          | 99.66       | Bacillota      | Granulicatella     | Granulicatella adiacens           | 23  |
| IF3KT08003    | ORT-AF03-214 | Streptococcus_infantis                           | 99.32       | Bacillota      | Streptococcus      | Streptococcus infantis            | 73  |
| IF3KT08006BA  | ORT-AF03-21  | Streptococcus_salivarius                         | 99.93       | Bacillota      | Streptococcus      | Streptococcus salivarius          | 4   |
| IF3KT09001    | ORT-AF04-16  | Streptococcus_infantis                           | 98.91       | Bacillota      | Streptococcus      | 0                                 | 110 |
| IF3KT09001A   | ORT-AF04-172 | Atopobium_parvulum                               | 99.65       | Actinomycetota | Lancefieldella     | 0                                 | 2   |
| IF3KT09001BA  | ORT-AF04-123 | Actinomyces_odontolyticus                        | 99.15       | Actinomycetota | Pauljensenia       | Pauljensenia sp001064145          | 42  |
| IF3KT09002    | ORT-AF04-193 | Streptococcus_salivarius                         | 99.86       | Bacillota      | Streptococcus      | Streptococcus salivarius          | 4   |
| IF3KT09003A   | ORT-AF04-219 | Streptococcus_parasanguinis                      | 99.18       | Bacillota      | Streptococcus      | Streptococcus sp900766505         | 6   |
| IF3KT09003BA  | ORT-AF04-125 | Lactococcus_lactis<br>/Actinomyces_odontolyticus | 100/95.7    | Actinomycetota | Pauljensenia       | Pauljensenia sp001064145          | 42  |
| IF3KT10001A   | ORT-AF05-117 | Enterococcus_faecalis                            | 100.00      | Bacillota      | Enterococcus       | Enterococcus faecalis             | 21  |
| IF3KT10005A   | ORT-AF05-121 | Granulicatella_adiacens                          | 98.43       | Bacillota      | Granulicatella     | 0                                 | 95  |
| IF3KT11001A   | ORT-AM04-57  | Streptococcus_salivarius                         | 100.00      | Bacillota      | Streptococcus      | Streptococcus salivarius          | 4   |
| IF3KT11003A   | ORT-AM04-59  | Streptococcus_oralis                             | 99.11       | Bacillota      | Streptococcus      | Streptococcus sp015256435         | 111 |
| IF3KT12001    | ORT-AM05-07  | Streptococcus_salivarius                         | 100.00      | Bacillota      | Streptococcus      | Streptococcus salivarius          | 4   |
| IF3KT12002AB  | ORT-AM05-499 | Streptococcus_rubneri                            | 99.51       | Bacillota      | Streptococcus      | Streptococcus rubneri             | 14  |
| IF3KT12003A   | ORT-AM05-281 | Streptococcus_timonensis                         | 99.79       | Bacillota      | Streptococcus      | Streptococcus mitis_BG            | 16  |
| IF3KT12003ABC | ORT-AM05-525 | Streptococcus_mitis                              | 99.79       | Bacillota      | Streptococcus      | Streptococcus mitis_AZ            | 11  |
| IF3KT12004A   | ORT-AM05-282 | Streptococcus_oralis                             | 98.64       | Bacillota      | Streptococcus      | Streptococcus sp002355895         | 112 |
| IF3KT12004ABC | ORT-AM05-527 | Streptococcus_mitis                              | 99.79       | Bacillota      | Streptococcus      | Streptococcus mitis_AZ            | 11  |
| IF3KT12009A   | ORT-AM05-511 | Streptococcus_constellatus                       | 99.12       | Bacillota      | Streptococcus      | Streptococcus constellatus        | 46  |
| IF3KT12009AC  | ORT-AM05-512 | Streptococcus_constellatus                       | 99.12       | Bacillota      | Streptococcus      | Streptococcus constellatus        | 46  |
| IF3KT13002A   | ORT-TM06-179 | Streptococcus_salivarius                         | 99.93       | Bacillota      | Streptococcus      | Streptococcus salivarius          | 4   |
| IF3KT13004A   | ORT-TM06-181 | Streptococcus_gordonii                           | 99.66       | Bacillota      | Streptococcus      | Streptococcus gordonii            | 63  |
| IF3KT13004B   | ORT-TM06-80  | Rothia_mucilaginoso                              | 99.37       | Actinomycetota | Rothia             | Rothia mucilaginoso_B             | 59  |
| IF3KT13012A   | ORT-TM06-189 | Streptococcus_sanguinis                          | 100.00      | Bacillota      | Streptococcus      | Streptococcus sanguinis_C         | 113 |
| IF3KT14001    | ORT-TM07-187 | Microbacterium_oxydans                           | 99.79       | Actinomycetota | Microbacterium     | Microbacterium algeriense         | 12  |
| IF3KT14001A   | ORT-TM07-84  | Streptococcus_salivarius                         | 100.00      | Bacillota      | Streptococcus      | Streptococcus salivarius          | 4   |
| IF3KT14001AB  | ORT-TM07-100 | Streptococcus_salivarius                         | 100.00      | Bacillota      | Streptococcus      | Streptococcus salivarius          | 4   |
| IF3KT14002AB  | ORT-TM07-101 | Actinomyces_odontolyticus<br>/Gemella_sanguinis  | 98.79/99.93 | Actinomycetota | Pauljensenia       | Pauljensenia sp018382595          | 97  |
| IF3KT14003AB  | ORT-TM07-102 | Actinomyces_odontolyticus                        | 98.93       | Actinomycetota | Pauljensenia       | Pauljensenia sp018382595          | 97  |
| IF3KT14004A   | ORT-TM07-87  | Streptococcus_parasanguinis                      | 98.84       | Bacillota      | Streptococcus      | 0                                 | 22  |
| IF3KT14006A   | ORT-TM07-89  | Streptococcus_timonensis                         | 99.86       | Bacillota      | Streptococcus      | Streptococcus timonensis          | 16  |
| IF3KT14007A   | ORT-TM07-90  | Atopobium_parvulum                               | 99.72       | Actinomycetota | Lancefieldella     | Lancefieldella sp000564995        | 114 |
| IF3KT14008A   | ORT-TM07-91  | Streptococcus_parasanguinis                      | 98.84       | Bacillota      | Streptococcus      | 0                                 | 22  |
| IF3KT14008AB  | ORT-TM07-107 | Streptococcus_rubneri                            | 99.51       | Bacillota      | Streptococcus      | Streptococcus xiaochunlingii      | 5   |
| IF3KT14009AB  | ORT-TM07-108 | Streptococcus_parasanguinis                      | 98.84       | Bacillota      | Streptococcus      | 0                                 | 22  |
| IF3KT15001    | ORT-AM08-202 | Streptococcus_salivarius                         | 99.93       | Bacillota      | Streptococcus      | Streptococcus salivarius          | 4   |
| IF3KT15002B   | ORT-AM08-226 | Rothia_dentocarioso                              | 100.00      | Actinomycetota | Rothia             | Rothia dentocarioso               | 13  |
| IF3KT15004    | ODP-AM08-337 | Gemella_sanguinis                                | 99.86       | Bacillota      | Gemella            | Gemella sanguinis                 | 17  |
| IF3KT15004A   | ORT-AM08-425 | Streptococcus_anginosus                          | 99.59       | Bacillota      | Streptococcus      | Streptococcus anginosus           | 61  |
| IF3KT15006    | ORT-AM08-480 | Rothia_mucilaginoso                              | 99.58       | Actinomycetota | Rothia             | Rothia mucilaginoso               | 78  |
| IF3KT15007A   | ORT-AM08-428 | Actinomyces_odontolyticus                        | 98.93       | Actinomycetota | Pauljensenia       | Pauljensenia sp018382595          | 97  |
| IF3KT15008AB  | ORT-AM08-458 | Granulicatella_adiacens                          | 99.72       | Bacillota      | Granulicatella     | 0                                 | 25  |
| IF3KT15013A   | ORT-AM08-434 | Streptococcus_australis                          | 99.38       | Bacillota      | Streptococcus      | 0                                 | 60  |
| IF3KT16001B   | ORT-AF06-28  | Microbacterium_oxydans                           | 99.79       | Actinomycetota | Microbacterium     | Microbacterium algeriense         | 12  |
| IF3KT16003B   | ORT-AF06-30  | Streptococcus_rubneri                            | 99.38       | Bacillota      | Streptococcus      | Streptococcus xiaochunlingii      | 5   |
| IF3KT16004    | ORT-AF06-10  | Microbacterium_oxydans                           | 99.79       | Actinomycetota | Microbacterium     | Microbacterium algeriense         | 12  |
| IF3KT16005    | ORT-AF06-36  | Streptococcus_infantis                           | 99.45       | Bacillota      | Streptococcus      | Streptococcus infantis_H          | 73  |
| JF3KA10001A   | ORS-AF05-30  | Lactobacillus_paracasei                          | 99.90       | Bacillota      | Lactocaseibacillus | Lactocaseibacillus paracasei      | 43  |
| JF3KA12003    | ORS-AM05-138 | Streptococcus_mitis                              | 99.76       | Bacillota      | Streptococcus      | Streptococcus mitis_AZ            | 11  |
| JF3KA12004B   | ORS-AM05-334 | Neisseria_elongata                               | 99.79       | Pseudomonadota | Neisseria          | Neisseria elongata                | 64  |
| JF3KA12006AB  | ORS-AM05-362 | Fusobacterium_periodonticum                      | 99.37       | Fusobacteriota | Fusobacterium      | Fusobacterium pseudoperiodonticum | 80  |
| JF3KA12006B   | ORS-AM05-474 | Rothia_mucilaginoso                              | 99.51       | Actinomycetota | Rothia             | Rothia mucilaginoso_B             | 59  |
| JF3KA12007AB  | ORS-AM05-363 | Streptococcus_sinensis                           | 99.45       | Bacillota      | Streptococcus      | Streptococcus sinensis            | 24  |
| JF3KA13004    | ORS-TM06-31  | Rothia_dentocarioso                              | 100.00      | Actinomycetota | Rothia             | Rothia dentocarioso               | 13  |
| JF3KA14001AB  | ORS-TM07-54  | Enterococcus_faecalis                            | 100.00      | Bacillota      | Enterococcus       | Enterococcus faecalis             | 21  |
| JF3KA15002AB  | ORS-AM08-63  | Streptococcus_mitis                              | 99.38       | Bacillota      | Streptococcus      | 0                                 | 115 |
| JF3KC08001A   | ODP-AF03-102 | Streptococcus_mitis                              | 97.88       | Bacillota      | Streptococcus      | Streptococcus oralis              | 107 |
| JF3KC09001    | ODP-AF04-91  | Streptococcus_salivarius                         | 100.00      | Bacillota      | Streptococcus      | Streptococcus salivarius          | 4   |
| JF3KC09004    | ODP-AF04-94  | Streptococcus_mitis                              | 99.45       | Bacillota      | Streptococcus      | 0                                 | 9   |
| JF3KC11001    | ODP-AM04-107 | Streptococcus_salivarius                         | 100.00      | Bacillota      | Streptococcus      | Streptococcus salivarius          | 4   |

|              |              |                                               |           |                |                 |                                   |     |
|--------------|--------------|-----------------------------------------------|-----------|----------------|-----------------|-----------------------------------|-----|
| JF3KC12001A  | ODP-AM05-244 | Streptococcus_anginosus                       | 99.52     | Bacillota      | Streptococcus   | Streptococcus anginosus           | 61  |
| JF3KC12002AB | ODP-AM05-271 | Granulicatella_adiacens                       | 99.66     | Bacillota      | Granulicatella  | 0                                 | 34  |
| JF3KC12002B  | ODP-AM05-303 | Neisseria_macacae                             | 99.52     | Pseudomonadota | Neisseria       | Neisseria sicca_A                 | 44  |
| JF3KC12003AB | ODP-AM05-272 | Granulicatella_adiacens                       | 99.66     | Bacillota      | Granulicatella  | Granulicatella sp905371865        | 30  |
| JF3KC12004AB | ODP-AM05-391 | Lactococcus_lactis /Actinomyces_oris          | 100/99.76 | Actinomycetota | Actinomyces     | Actinomyces oris_A                | 58  |
| JF3KC12005A  | ODP-AM05-504 | Streptococcus_mitis                           | 99.59     | Bacillota      | Streptococcus   | 0                                 | 116 |
| JF3KC14002B  | ODP-TM07-321 | Microbacterium_oxydans                        | 99.79     | Actinomycetota | Microbacterium  | Microbacterium algeriense         | 12  |
| JF3KC16002   | ODP-AF06-99  | Streptococcus_mitis                           | 99.79     | Bacillota      | Streptococcus   | Streptococcus mitis_AK            | 101 |
| JF3KC16004   | ODP-AF06-105 | Microbacterium_oxydans                        | 99.79     | Actinomycetota | Microbacterium  | Microbacterium algeriense         | 12  |
| JF3KT08002A  | ORT-AF03-133 | Fusobacterium_periodonticum                   | 99.78     | Fusobacteriota | Fusobacterium   | Fusobacterium pseudoperiodonticum | 80  |
| JF3KT08002BA | ORT-AF03-24  | Streptococcus_salivarius                      | 100.00    | Bacillota      | Streptococcus   | Streptococcus sp001556435         | 117 |
| JF3KT09001A  | ORT-AF04-174 | Actinomyces_odontolyticus                     | 99.69     | Actinomycetota | Pauljensenia    | Pauljensenia sp001064145          | 42  |
| JF3KT09003   | ORT-AF04-19  | Streptococcus_salivarius                      | 99.93     | Bacillota      | Streptococcus   | Streptococcus salivarius          | 4   |
| JF3KT09003A  | ORT-AF04-225 | Actinomyces_odontolyticus                     | 80.15     | Actinomycetota | Pauljensenia    | Pauljensenia sp001064145          | 42  |
| JF3KT10001   | ORT-AF05-174 | Rothia_mucilaginoso                           | 99.51     | Actinomycetota | Rothia          | Rothia mucilaginoso_A             | 41  |
| JF3KT10001A  | ORT-AF05-123 | Enterococcus_faecalis                         | 100.00    | Bacillota      | Enterococcus    | Enterococcus faecalis             | 21  |
| JF3KT12003B  | ORT-AM05-319 | Neisseria_elongata                            | 99.79     | Pseudomonadota | Neisseria       | Neisseria elongata                | 64  |
| JF3KT12005AB | ORT-AM05-529 | Streptococcus_mitis                           | 99.38     | Bacillota      | Streptococcus   | 0                                 | 118 |
| JF3KT12007A  | ORT-AM05-514 | Streptococcus_salivarius                      | 100.00    | Bacillota      | Streptococcus   | Streptococcus salivarius          | 4   |
| JF3KT14002   | ORT-TM07-192 | Rothia_mucilaginoso                           | 99.37     | Actinomycetota | Rothia          | Rothia mucilaginoso_B             | 59  |
| JF3KT15001   | ORT-AM08-205 | Rothia_mucilaginoso                           | 99.58     | Actinomycetota | Rothia          | Rothia mucilaginoso               | 78  |
| JF3KT15001A  | ORT-AM08-438 | Streptococcus_salivarius                      | 100.00    | Bacillota      | Streptococcus   | Streptococcus salivarius          | 4   |
| JF3KT15002   | ORT-AM08-206 | Streptococcus_oralis                          | 97.14     | Bacillota      | Streptococcus   | Streptococcus pseudopneumoniae_A  | 119 |
| JF3KT15002B  | ODP-AM08-363 | Rothia_mucilaginoso                           | 99.51     | Actinomycetota | Rothia          | Rothia mucilaginoso               | 78  |
| MF3KA09001A  | ORS-AF04-142 | Streptococcus_oralis                          | 99.11     | Bacillota      | Streptococcus   | Streptococcus sp015256435         | 111 |
| MF3KA09002A  | ORS-AF04-143 | Streptococcus_oralis                          | 99.32     | Bacillota      | Streptococcus   | 0                                 | 120 |
| MF3KA09005A  | ORS-AF04-236 | Streptococcus_sanguinis                       | 99.93     | Bacillota      | Streptococcus   | Streptococcus sanguinis           | 3   |
| MF3KA11001   | ORS-AM04-111 | Granulicatella_adiacens                       | 99.66     | Bacillota      | Granulicatella  | 0                                 | 25  |
| MF3KA11001A  | ORS-AM04-88  | Actinomyces_odontolyticus                     | 99.69     | Actinomycetota | Pauljensenia    | Pauljensenia sp001064145          | 42  |
| MF3KA11003A  | ORS-AM04-90  | Atopobium_parvulum                            | 99.72     | Actinomycetota | Lancefieldella  | 0                                 | 2   |
| MF3KA12001B  | ORS-AM05-336 | Staphylococcus_hominis                        | 99.72     | Bacillota      | Staphylococcus  | Staphylococcus hominis            | 99  |
| MF3KA12002   | ORS-AM05-140 | #N/A                                          | #N/A      | Bacillota      | Streptococcus   | Streptococcus koreensis           | 48  |
| MF3KA12002AB | ORS-AM05-205 | Actinomyces_odontolyticus                     | 99.01     | Actinomycetota | Pauljensenia    | Pauljensenia sp000278725          | 121 |
| MF3KA12002B  | ORS-AM05-475 | Corynebacterium_argentoratense                | 99.79     | Actinomycetota | Corynebacterium | Corynebacterium argentoratense    | 54  |
| MF3KA12003AB | ORS-AM05-364 | Solobacterium_moorei                          | 98.27     | Bacillota      | Bulleidia       | 0                                 | 47  |
| MF3KA12004AB | ORS-AM05-365 | Streptococcus_timonensis                      | 99.86     | Bacillota      | Streptococcus   | Streptococcus mitis_BG            | 16  |
| MF3KA12007AB | ORS-AM05-494 | Streptococcus_salivarius                      | 99.86     | Bacillota      | Streptococcus   | Streptococcus salivarius          | 4   |
| MF3KA12008AB | ORS-AM05-495 | Streptococcus_constellatus                    | 99.79     | Bacillota      | Streptococcus   | Streptococcus constellatus        | 46  |
| MF3KA13001A  | ORS-TM06-111 | Streptococcus_anginosus                       | 98.24     | Bacillota      | Streptococcus   | Streptococcus anginosus           | 61  |
| MF3KA13001AB | ORS-TM06-118 | Streptococcus_anginosus                       | 98.24     | Bacillota      | Streptococcus   | Streptococcus anginosus           | 61  |
| MF3KA13002A  | ORS-TM06-112 | Streptococcus_parasanguinis                   | 99.45     | Bacillota      | Streptococcus   | Streptococcus parasanguinis       | 20  |
| MF3KA13003A  | ORS-TM06-113 | Streptococcus_mitis                           | 99.25     | Bacillota      | Streptococcus   | 0                                 | 122 |
| MF3KA13004A  | ORS-TM06-114 | Gemella_haemolysans                           | 99.72     | Bacillota      | Gemella         | 0                                 | 84  |
| MF3KA13014A  | ORS-TM06-235 | Veillonella_tobetsuensis                      | 99.89     | Bacillota      | Veillonella     | Veillonella parvula_A             | 92  |
| MF3KA14001   | ORS-TM07-224 | Streptococcus_salivarius                      | 100.00    | Bacillota      | Streptococcus   | Streptococcus salivarius          | 4   |
| MF3KA14002   | ORS-TM07-225 | Streptococcus_mitis                           | 99.65     | Bacillota      | Streptococcus   | 0                                 | 85  |
| MF3KA14006B  | ORS-TM07-255 | Granulicatella_elegans                        | 99.52     | Bacillota      | Granulicatella  | 0                                 | 123 |
| MF3KA15001AB | ORS-AM08-69  | Granulicatella_adiacens                       | 99.72     | Bacillota      | Granulicatella  | Granulicatella sp001058355        | 106 |
| MF3KA15005B  | ORS-AM08-136 | Rothia_mucilaginoso                           | 99.44     | Actinomycetota | Rothia          | Rothia mucilaginoso               | 78  |
| MF3KC09001   | ODP-AF04-99  | Streptococcus_salivarius                      | 99.86     | Bacillota      | Streptococcus   | Streptococcus salivarius          | 4   |
| MF3KC09001B  | ODP-AF04-114 | Lactobacillus_paracasei                       | 99.90     | Bacillota      | Lactobacillus   | Lactobacillus paracasei           | 43  |
| MF3KC09002A  | ODP-AF04-250 | Streptococcus_intermedius                     | 100.00    | Bacillota      | Streptococcus   | Streptococcus intermedius         | 70  |
| MF3KC11001A  | ODP-AM04-44  | Streptococcus_salivarius                      | 100.00    | Bacillota      | Streptococcus   | Streptococcus salivarius          | 4   |
| MF3KC11002A  | ODP-AM04-45  | Streptococcus_cristatus                       | 99.65     | Bacillota      | Streptococcus   | 0                                 | 124 |
| MF3KC12001A  | ODP-AM05-247 | Streptococcus_sanguinis                       | 99.65     | Bacillota      | Streptococcus   | Streptococcus sanguinis_A         | 29  |
| MF3KC12001AB | ODP-AM05-273 | Streptococcus_anginosus                       | 99.52     | Bacillota      | Streptococcus   | Streptococcus anginosus           | 61  |
| MF3KC12001B  | ODP-AM05-76  | Rothia_dentocarioso                           | 99.93     | Actinomycetota | Rothia          | Rothia dentocarioso               | 13  |
| MF3KC12002A  | ODP-AM05-248 | Streptococcus_anginosus                       | 99.52     | Bacillota      | Streptococcus   | Streptococcus anginosus           | 61  |
| MF3KC12002AB | ODP-AM05-535 | Streptococcus_mitis                           | 99.79     | Bacillota      | Streptococcus   | Streptococcus mitis_AZ            | 11  |
| MF3KC12003   | ODP-AM05-41  | Streptococcus_anginosus                       | 99.52     | Bacillota      | Streptococcus   | Streptococcus anginosus           | 61  |
| MF3KC12003A  | ODP-AM05-249 | Granulicatella_adiacens                       | 99.66     | Bacillota      | Granulicatella  | Granulicatella adiacens           | 23  |
| MF3KC12003B  | ODP-AM05-78  | Streptococcus_gordonii                        | 99.93     | Bacillota      | Streptococcus   | Streptococcus gordonii            | 63  |
| MF3KC12004A  | ODP-AM05-429 | Streptococcus_salivarius                      | 100.00    | Bacillota      | Streptococcus   | Streptococcus salivarius          | 4   |
| MF3KC12006B  | ODP-AM05-440 | Corynebacterium_accolens                      | 99.72     | Actinomycetota | Corynebacterium | Corynebacterium accolens          | 125 |
| MF3KC13003   | ODP-TM06-55  | Streptococcus_gordonii                        | 99.66     | Bacillota      | Streptococcus   | Streptococcus gordonii            | 63  |
| MF3KC15001A  | ODP-AM08-309 | Streptococcus_cristatus                       | 99.72     | Bacillota      | Streptococcus   | Streptococcus cristatus           | 36  |
| MF3KC15002A  | ODP-AM08-310 | Granulicatella_adiacens                       | 99.72     | Bacillota      | Granulicatella  | Granulicatella adiacens           | 23  |
| MF3KC15010AB | ODP-AM08-335 | Granulicatella_adiacens                       | 99.72     | Bacillota      | Granulicatella  | Granulicatella adiacens           | 23  |
| MF3KT08001   | ORT-AF03-215 | Streptococcus_oralis                          | 98.91     | Bacillota      | Streptococcus   | 0                                 | 126 |
| MF3KT08001A  | ORT-AF03-01  | Streptococcus_parasanguinis                   | 99.11     | Bacillota      | Streptococcus   | Streptococcus parasanguinis_D     | 71  |
| MF3KT08004A  | ORT-AF03-04  | Streptococcus_intermedius                     | 100.00    | Bacillota      | Streptococcus   | Streptococcus intermedius         | 70  |
| MF3KT08008A  | ORT-AF03-08  | Streptococcus_parasanguinis                   | 99.93     | Bacillota      | Streptococcus   | Streptococcus parasanguinis       | 20  |
| MF3KT09001   | ORT-AF04-23  | Streptococcus_salivarius                      | 99.86     | Bacillota      | Streptococcus   | Streptococcus salivarius          | 4   |
| MF3KT09001A  | ORT-AF04-222 | Atopobium_parvulum                            | 99.72     | Actinomycetota | Lancefieldella  | 0                                 | 2   |
| MF3KT09003A  | ORT-AF04-247 | Streptococcus_infantis                        | 99.59     | Bacillota      | Streptococcus   | 0                                 | 127 |
| MF3KT10001A  | ORT-AF05-128 | Enterococcus_faecalis                         | 100.00    | Bacillota      | Enterococcus    | Enterococcus faecalis             | 21  |
| MF3KT10005A  | ORT-AF05-132 | Atopobium_rimae                               | 99.86     | Actinomycetota | Lancefieldella  | Lancefieldella rimae              | 128 |
| MF3KT10008A  | ORT-AF05-232 | Lactococcus_lactis /Actinomyces_odontolyticus | 100/98.86 | Actinomycetota | Pauljensenia    | 0                                 | 129 |
| MF3KT11002A  | ORT-AM04-65  | Streptococcus_salivarius                      | 99.86     | Bacillota      | Streptococcus   | Streptococcus salivarius          | 4   |
| MF3KT12001A  | ORT-AM05-287 | Streptococcus_mitis                           | 99.79     | Bacillota      | Streptococcus   | Streptococcus mitis_AZ            | 11  |
| MF3KT12001AB | ORT-AM05-101 | Granulicatella_adiacens                       | 99.66     | Bacillota      | Granulicatella  | 0                                 | 25  |
| MF3KT12002A  | ORT-AM05-515 | Streptococcus_salivarius                      | 100.00    | Bacillota      | Streptococcus   | Streptococcus salivarius          | 4   |
| MF3KT12002AB | ORT-AM05-102 | Streptococcus_mitis                           | 99.79     | Bacillota      | Streptococcus   | Streptococcus mitis_AZ            | 11  |
| MF3KT12003A  | ORT-AM05-521 | Streptococcus_mitis                           | 99.79     | Bacillota      | Streptococcus   | Streptococcus mitis_AZ            | 11  |
| MF3KT12004AB | ORT-AM05-104 | Streptococcus_mitis                           | 99.79     | Bacillota      | Streptococcus   | Streptococcus mitis_AZ            | 11  |

|                |                |                                                         |           |                |                   |                                   |     |
|----------------|----------------|---------------------------------------------------------|-----------|----------------|-------------------|-----------------------------------|-----|
| MF3KT12004B    | ORT-AM05-63    | Streptococcus_salivarius                                | 100.00    | Bacillota      | Streptococcus     | Streptococcus salivarius          | 4   |
| MF3KT12008B    | ORT-AM05-310   | Rothia_mucilaginoso                                     | 99.51     | Actinomycetota | Rothia            | Rothia mucilaginoso_B             | 59  |
| MF3KT13001A    | ORT-TM06-193   | Streptococcus_mitis                                     | 97.34     | Bacillota      | Streptococcus     | 0                                 | 130 |
| MF3KT13002A    | ORT-TM06-194   | Streptococcus_rubneri                                   | 98.76     | Bacillota      | Streptococcus     | Streptococcus xiaochunlingii      | 5   |
| MF3KT13003A    | ORT-TM06-195   | Streptococcus_gordonii                                  | 99.66     | Bacillota      | Streptococcus     | Streptococcus gordonii            | 63  |
| MF3KT13008A    | ORT-TM06-200   | Gemella_sanguinis                                       | 99.86     | Bacillota      | Gemella           | Gemella sanguinis                 | 17  |
| MF3KT13011A    | ORT-TM06-203   | Streptococcus_parasanguinis                             | 99.79     | Bacillota      | Streptococcus     | Streptococcus parasanguinis       | 20  |
| MF3KT14001B    | ORT-TM07-207   | Streptococcus_salivarius                                | 100.00    | Bacillota      | Streptococcus     | Streptococcus salivarius          | 4   |
| MF3KT15001A    | ORT-AM08-450   | Streptococcus_anginosus                                 | 99.66     | Bacillota      | Streptococcus     | Streptococcus anginosus           | 61  |
| MF3KT15001AB   | ORT-AM08-463   | Streptococcus_anginosus                                 | 99.66     | Bacillota      | Streptococcus     | Streptococcus anginosus           | 61  |
| MF3KT15001B    | ORT-AM08-229   | Lactococcus_garvieae                                    | 100.00    | Bacillota      | Lactococcus       | Lactococcus garvieae              | 51  |
| MF3KT15004     | ORT-AM08-210   | Lactococcus_garvieae                                    | 100.00    | Bacillota      | Lactococcus       | Lactococcus garvieae              | 51  |
| MF3KT16001     | ORT-AF06-11    | Microbacterium_oxydans                                  | 99.79     | Actinomycetota | Microbacterium    | Microbacterium algeriense         | 12  |
| MF3KT16003B    | ORT-AF06-97    | Rothia_mucilaginoso                                     | 99.58     | Actinomycetota | Rothia            | Rothia mucilaginoso_B             | 59  |
| ODP-AM01-02BB  | ODP-AM01-02BB  | Streptococcus_mitis                                     | 99.65     | Bacillota      | Streptococcus     | Streptococcus oralis              | 107 |
| ODP-AM01-02O   | ODP-AM01-02O   | Neisseria_cinerea                                       | 98.35     | Pseudomonadota | Neisseria         | Neisseria subflava                | 15  |
| ODP-AM01-04    | ODP-AM01-04    | Streptococcus_sinensis                                  | 99.72     | Bacillota      | Streptococcus     | Streptococcus sinensis            | 24  |
| ODP-AM01-04MBO | ODP-AM01-04MBO | Streptococcus_salivarius                                | 99.93     | Bacillota      | Streptococcus     | Streptococcus vestibularis        | 131 |
| ODP-AM01-05    | ODP-AM01-05    | Gemella_morbilloorum                                    | 98.98     | Bacillota      | Gemella           | Gemella morbilloorum              | 65  |
| ODP-AM01-05BB  | ODP-AM01-05BB  | Actinomyces_hongkongensis                               | 98.30     | Actinomycetota | Pauljensenia      | Pauljensenia hongkongensis        | 132 |
| ODP-AM01-06    | ODP-AM01-06    | Fusobacterium_nucleatum                                 | 99.43     | Fusobacteriota | Fusobacterium     | 0                                 | 133 |
| ODP-AM01-08    | ODP-AM01-08    | Streptococcus_mitis                                     | 99.65     | Bacillota      | Streptococcus     | Streptococcus oralis              | 107 |
| ODP-AM01-10    | ODP-AM01-10    | Catonella_morbi                                         | 92.54     | Bacillota      | Catonella         | 0                                 | 134 |
| ORS-AM01-01    | ORS-AM01-01    | Streptococcus_salivarius                                | 99.93     | Bacillota      | Streptococcus     | Streptococcus vestibularis        | 131 |
| ORS-AM01-01BB  | ORS-AM01-01BB  | Actinomyces_naeslundii                                  | 97.23     | Actinomycetota | Actinomyces       | Actinomyces oris                  | 39  |
| ORS-AM01-01O   | ORS-AM01-01O   | Neisseria_subflava                                      | 99.77     | Pseudomonadota | Neisseria         | Neisseria subflava                | 15  |
| ORS-AM01-02    | ORS-AM01-02    | Fusobacterium_periodonticum                             | 99.30     | Fusobacteriota | Fusobacterium     | Fusobacterium pseudoperiodonticum | 80  |
| ORS-AM01-02BB  | ORS-AM01-02BB  | Streptococcus_infantis                                  | 99.25     | Bacillota      | Streptococcus     | 0                                 | 135 |
| ORS-AM01-02BBO | ORS-AM01-02BBO | Actinomyces_naeslundii                                  | 97.23     | Actinomycetota | Actinomyces       | Actinomyces oris                  | 39  |
| ORS-AM01-02MB  | ORS-AM01-02MB  | Streptococcus_sanguinis                                 | 99.72     | Bacillota      | Streptococcus     | Streptococcus sanguinis_A         | 29  |
| ORS-AM01-03BB  | ORS-AM01-03BB  | Streptococcus_rubneri                                   | 99.45     | Bacillota      | Streptococcus     | Streptococcus rubneri             | 14  |
| ORS-AM01-04BBO | ORS-AM01-04BBO | Morococcus_cerebrosus                                   | 99.93     | Pseudomonadota | Neisseria         | Neisseria cerebrosa               | 136 |
| ORS-AM01-04MB  | ORS-AM01-04MB  | Streptococcus_constellatus                              | 99.93     | Bacillota      | Streptococcus     | Streptococcus constellatus        | 46  |
| ORS-AM01-13TBO | ORS-AM01-13TBO | Neisseria_flavescens                                    | 98.15     | Pseudomonadota | Neisseria         | Neisseria flavescens_B            | 15  |
| ORT-AM01-01TBO | ORT-AM01-01TBO | Bacillus_cereus                                         | 100.00    | Bacillota      | Bacillus_A        | Bacillus_A luti                   | 137 |
| ORT-AM01-02    | ORT-AM01-02    | Eubacterium_yurii                                       | 92.98     | Bacillota      | Peptoanaerobacter | 0                                 | 138 |
| ORT-AM01-03O   | ORT-AM01-03O   | Rothia_mucilaginoso                                     | 99.37     | Actinomycetota | Rothia            | Rothia mucilaginoso_B             | 59  |
| ORT-AM01-05MB  | ORT-AM01-05MB  | Streptococcus_constellatus                              | 99.93     | Bacillota      | Streptococcus     | Streptococcus constellatus        | 46  |
| ORT-AM01-06O   | ORT-AM01-06O   | Granulicatella_adiacens                                 | 99.66     | Bacillota      | Granulicatella    | 0                                 | 25  |
| ORT-AM01-08MB  | ORT-AM01-08MB  | Streptococcus_cristatus                                 | 99.65     | Bacillota      | Streptococcus     | Streptococcus sp902460355         | 139 |
| ORT-AM01-12O   | ORT-AM01-12O   | Bacillus_aryabhatai                                     | 100.00    | Bacillota      | Priestia          | Priestia megaterium_A             | 140 |
| PF3KA08003A    | ORS-AF03-153   | Streptococcus_salivarius                                | 100.00    | Bacillota      | Streptococcus     | Streptococcus sp001556435         | 117 |
| PF3KA08005A    | ORS-AF03-155   | Streptococcus_pseudopneumoniae                          | 99.65     | Bacillota      | Streptococcus     | Streptococcus sp000187745         | 141 |
| PF3KA09001A    | ORS-AF04-146   | Streptococcus_salivarius                                | 99.86     | Bacillota      | Streptococcus     | Streptococcus salivarius          | 4   |
| PF3KA10004A    | ORS-AF05-45    | Atopobium_parvulum                                      | 99.72     | Actinomycetota | Lancefieldella    | 0                                 | 2   |
| PF3KA11001A    | ORS-AM04-42    | Actinomyces_odontolyticus                               | 98.37     | Actinomycetota | Pauljensenia      | Pauljensenia odontolytica_A       | 27  |
| PF3KA12001     | ORS-AM05-141   | Streptococcus_mitis                                     | 99.72     | Bacillota      | Streptococcus     | Streptococcus mitis_AZ            | 11  |
| PF3KA12002AB   | ORS-AM05-207   | Fusobacterium_hwasookii                                 | 100.00    | Fusobacteriota | Fusobacterium     | Fusobacterium hwasookii           | 142 |
| PF3KA12003AB   | ORS-AM05-208   | Fusobacterium_periodonticum                             | 99.71     | Fusobacteriota | Fusobacterium     | Fusobacterium pseudoperiodonticum | 80  |
| PF3KA12005B    | ORS-AM05-477   | Rothia_mucilaginoso                                     | 99.51     | Actinomycetota | Rothia            | Rothia mucilaginoso_B             | 59  |
| PF3KA12007     | ORS-AM05-147   | Rothia_dentocariosa                                     | 99.93     | Actinomycetota | Rothia            | Rothia dentocariosa               | 13  |
| PF3KA13002     | ORS-TM06-36    | Streptococcus_mitis                                     | 95.23     | Bacillota      | Streptococcus     | Streptococcus oralis_B            | 31  |
| PF3KA13004B    | ORS-TM06-246   | Rothia_dentocariosa                                     | 99.93     | Actinomycetota | Rothia            | Rothia dentocariosa               | 13  |
| PF3KA14002     | ORS-TM07-227   | Streptococcus_mitis                                     | 98.97     | Bacillota      | Streptococcus     | 0                                 | 143 |
| PF3KA14002AB   | ORS-TM07-61    | Streptococcus_salivarius                                | 100.00    | Bacillota      | Streptococcus     | Streptococcus salivarius          | 4   |
| PF3KA14003B    | ORS-TM07-262   | Microbacterium_oxydans                                  | 99.79     | Actinomycetota | Microbacterium    | Microbacterium algeriense         | 12  |
| PF3KA14005AB   | ORS-TM07-64    | Actinomyces_odontolyticus                               | 98.93     | Actinomycetota | Pauljensenia      | Pauljensenia sp018382595          | 97  |
| PF3KA14007AB   | ORS-TM07-66    | Actinomyces_odontolyticus                               | 99.19     | Actinomycetota | Pauljensenia      | Pauljensenia sp018382595          | 97  |
| PF3KA14014AB   | ORS-TM07-73    | Enterococcus_faecalis                                   | 100.00    | Bacillota      | Enterococcus      | Enterococcus faecalis             | 21  |
| PF3KA15001A    | ORS-AM08-42    | Streptococcus_parasanguinis                             | 99.72     | Bacillota      | Streptococcus     | Streptococcus parasanguinis       | 20  |
| PF3KA15002A    | ORS-AM08-43    | Atopobium_parvulum                                      | 99.65     | Actinomycetota | Lancefieldella    | Lancefieldella sp000564995        | 26  |
| PF3KA15003A    | ORS-AM08-44    | Granulicatella_adiacens                                 | 99.72     | Bacillota      | Granulicatella    | Granulicatella sp001058355        | 18  |
| PF3KA15006AB   | ORS-AM08-178   | Actinomyces_odontolyticus                               | 99.29     | Actinomycetota | Pauljensenia      | 0                                 | 144 |
| PF3KC08001A    | ODP-AF03-106   | Enterococcus_faecalis                                   | 100.00    | Bacillota      | Enterococcus      | Enterococcus faecalis             | 21  |
| PF3KC08007BA   | ODP-AF03-248   | Bacillus_paralicheniformis                              | 100.00    | Bacillota      | Bacillus          | Bacillus paralicheniformis        | 145 |
| PF3KC09001     | ODP-AF04-102   | Streptococcus_salivarius                                | 99.85     | Bacillota      | Streptococcus     | Streptococcus salivarius          | 4   |
| PF3KC09001A    | ODP-AF04-243   | Streptococcus_sanguinis                                 | 99.86     | Bacillota      | Streptococcus     | Streptococcus sanguinis_H         | 3   |
| PF3KC09002     | ODP-AF04-103   | Streptococcus_salivarius                                | 99.86     | Bacillota      | Streptococcus     | Streptococcus salivarius          | 4   |
| PF3KC09002A    | ODP-AF04-244   | Granulicatella_adiacens                                 | 99.93     | Bacillota      | Granulicatella    | Granulicatella adiacens           | 23  |
| PF3KC09004     | ODP-AF04-105   | Gemella_haemolysans                                     | 98.03     | Bacillota      | Gemella           | Gemella haemolysans_B             | 49  |
| PF3KC09005     | ODP-AF04-106   | Streptococcus_salivarius                                | 99.86     | Bacillota      | Streptococcus     | Streptococcus salivarius          | 4   |
| PF3KC10001A    | ODP-AF05-85    | Actinomyces_odontolyticus                               | 99.15     | Actinomycetota | Pauljensenia      | Pauljensenia sp001064145          | 42  |
| PF3KC11001A    | ODP-AM04-46    | Streptococcus_salivarius                                | 100.00    | Bacillota      | Streptococcus     | Streptococcus salivarius          | 4   |
| PF3KC12001     | ODP-AM05-43    | Rothia_dentocariosa                                     | 99.93     | Actinomycetota | Rothia            | Rothia dentocariosa               | 13  |
| PF3KC12001B    | ODP-AM05-80    | Streptococcus_oralis                                    | 99.66     | Bacillota      | Streptococcus     | Streptococcus oralis_B            | 31  |
| PF3KC12002A    | ODP-AM05-432   | Fusobacterium_nucleatum                                 | 98.82     | Fusobacteriota | Fusobacterium     | Fusobacterium animalis            | 146 |
| PF3KC12003B    | ODP-AM05-115   | Rothia_mucilaginoso                                     | 99.44     | Actinomycetota | Rothia            | Rothia mucilaginoso_B             | 59  |
| PF3KC12004A    | ODP-AM05-434   | Fusobacterium_nucleatum                                 | 99.93     | Fusobacteriota | Fusobacterium     | Fusobacterium polymorphum         | 87  |
| PF3KC12005A    | ODP-AM05-506   | Streptococcus_pseudopneumoniae                          | 99.79     | Bacillota      | Streptococcus     | Streptococcus symci               | 89  |
| PF3KC15001B    | ODP-AM08-275   | Streptococcus_salivarius                                | 100.00    | Bacillota      | Streptococcus     | Streptococcus salivarius          | 4   |
| PF3KC16003     | ODP-AF06-153   | Microbacterium_oxydans                                  | 99.79     | Actinomycetota | Microbacterium    | Microbacterium algeriense         | 12  |
| PF3KT08008BA   | ORT-AF03-41    | Actinomyces_odontolyticus                               | 98.86     | Actinomycetota | Pauljensenia      | Pauljensenia sp001838165          | 147 |
| PF3KT09001     | ORT-AF04-26    | Staphylococcus_epidermidis<br>/Streptococcus_salivarius | 100/99.86 | Bacillota      | Streptococcus     | Streptococcus salivarius          | 4   |
| PF3KT09003A    | ORT-AF04-176   | Prevotella_veroralis                                    | 97.93     | Bacteroidota   | Prevotella        | Prevotella sp000257925            | 62  |
| PF3KT09004A    | ORT-AF04-177   | Prevotella_histicola                                    | 99.86     | Bacteroidota   | Prevotella        | Prevotella histicola              | 28  |
| PF3KT09005A    | ORT-AF04-227   | Streptococcus_parasanguinis                             | 99.25     | Bacillota      | Streptococcus     | Streptococcus sp900766505         | 6   |

|              |              |                                                  |          |                |                |                              |     |
|--------------|--------------|--------------------------------------------------|----------|----------------|----------------|------------------------------|-----|
| PF3KT10003A  | ORT-AF05-233 | Atopobium_parvulum                               | 99.72    | Actinomycetota | Lancefieldella | 0                            | 96  |
| PF3KT12001   | ORT-AM05-13  | Streptococcus_mitis                              | 99.79    | Bacillota      | Streptococcus  | Streptococcus mitis_AZ       | 11  |
| PF3KT12001AB | ORT-AM05-105 | Granulicatella_adiacens                          | 99.25    | Bacillota      | Granulicatella | 0                            | 25  |
| PF3KT12002AB | ORT-AM05-106 | Streptococcus_salivarius                         | 99.86    | Bacillota      | Streptococcus  | Streptococcus salivarius     | 4   |
| PF3KT12003AB | ORT-AM05-500 | Streptococcus_mitis                              | 99.79    | Bacillota      | Streptococcus  | Streptococcus mitis_AZ       | 11  |
| PF3KT12003B  | ORT-AM05-112 | #N/A                                             | #N/A     | Bacillota      | Streptococcus  | Streptococcus gordonii       | 63  |
| PF3KT12005B  | ORT-AM05-304 | Rothia_mucilaginoso                              | 99.51    | Actinomycetota | Rothia         | Rothia mucilaginoso_B        | 59  |
| PF3KT12006A  | ORT-AM05-451 | Streptococcus_australis                          | 99.52    | Bacillota      | Streptococcus  | Streptococcus koreensis      | 48  |
| PF3KT14001   | ORT-TM07-195 | Microbacterium_oxydans                           | 99.79    | Actinomycetota | Microbacterium | Microbacterium algeriense    | 12  |
| PF3KT14001A  | ORT-TM07-93  | Streptococcus_salivarius                         | 100.00   | Bacillota      | Streptococcus  | Streptococcus salivarius     | 4   |
| PF3KT14001AB | ORT-TM07-110 | Actinomyces_odontolyticus                        | 98.93    | Actinomycetota | Pauljensenia   | Pauljensenia sp018382595     | 97  |
| PF3KT14001B  | ORT-TM07-310 | Microbacterium_oxydans                           | 99.79    | Actinomycetota | Microbacterium | Microbacterium algeriense    | 12  |
| PF3KT14002A  | ORT-TM07-94  | Granulicatella_adiacens                          | 99.66    | Bacillota      | Granulicatella | 0                            | 25  |
| PF3KT14003AB | ORT-TM07-112 | Streptococcus_salivarius                         | 99.52    | Bacillota      | Streptococcus  | Streptococcus salivarius     | 4   |
| PF3KT15003   | ORT-AM08-214 | Lactococcus_garvieae                             | 100.00   | Bacillota      | Lactococcus    | Lactococcus garvieae         | 51  |
| PF3KT16002   | ORT-AF06-14  | Microbacterium_oxydans                           | 99.79    | Actinomycetota | Microbacterium | Microbacterium algeriense    | 12  |
| PF3KT16002B  | ORT-AF06-148 | Rothia_mucilaginoso                              | 99.44    | Actinomycetota | Rothia         | Rothia sp001808955           | 78  |
| SF3KA08003A  | ORS-AF03-239 | Fusobacterium_nucleatum                          | 97.76    | Fusobacteriota | Fusobacterium  | Fusobacterium polymorphum    | 87  |
| SF3KA09001   | ORS-AF04-52  | Rothia_dentocariosa                              | 100.00   | Actinomycetota | Rothia         | Rothia dentocariosa          | 13  |
| SF3KA09003   | ORS-AF04-54  | Streptococcus_mitis                              | 99.79    | Bacillota      | Streptococcus  | Streptococcus oralis         | 107 |
| SF3KA09008   | ORS-AF04-59  | Streptococcus_mitis                              | 96.73    | Bacillota      | Streptococcus  | Streptococcus oralis         | 107 |
| SF3KA12006A  | ORS-AM05-380 | Capnocytophaga_leadbetteri                       | 95.12    | Bacteroidota   | Capnocytophaga | Capnocytophaga leadbetteri   | 81  |
| SF3KA12009AB | ORS-AM05-383 | Actinomyces_oris                                 | 99.76    | Actinomycetota | Actinomyces    | Actinomyces oris_A           | 58  |
| SF3KA12011AB | ORS-AM05-471 | Eubacterium_infirmum                             | 99.86    | Bacillota      | Eubacterium_B  | Eubacterium_B infirmum       | 148 |
| SF3KA13001   | ORS-TM06-37  | Neisseria_cinerea                                | 98.42    | Pseudomonadota | Neisseria      | Neisseria flavescens_B       | 15  |
| SF3KA13001A  | ORS-TM06-130 | Atopobium_parvulum                               | 99.72    | Actinomycetota | Lancefieldella | 0                            | 149 |
| SF3KA13003   | ORS-TM06-39  | Streptococcus_australis                          | 98.70    | Bacillota      | Streptococcus  | Streptococcus xiaochunlingii | 56  |
| SF3KA13005A  | ORS-TM06-134 | Granulicatella_adiacens                          | 99.86    | Bacillota      | Granulicatella | Granulicatella adiacens      | 23  |
| SF3KA13011A  | ORS-TM06-140 | Veillonella_dispar                               | 99.36    | Bacillota      | Veillonella    | Veillonella parvula_A        | 92  |
| SF3KA13014A  | ORS-TM06-237 | Prevotella_loescheii                             | 99.17    | Bacteroidota   | Prevotella     | Prevotella loescheii         | 150 |
| SF3KA14003AB | ORS-TM07-76  | Abiotrophia_defectiva                            | 99.39    | Bacillota      | Abiotrophia    | Abiotrophia sp001815865      | 55  |
| SF3KA14004A  | ORS-TM07-35  | Enterococcus_faecalis                            | 100.00   | Bacillota      | Enterococcus   | Enterococcus faecalis        | 21  |
| SF3KA14004AB | ORS-TM07-77  | Abiotrophia_defectiva                            | 99.64    | Bacillota      | Abiotrophia    | Abiotrophia sp001815865      | 55  |
| SF3KA14006AB | ORS-TM07-79  | Abiotrophia_defectiva                            | 99.39    | Bacillota      | Abiotrophia    | Abiotrophia sp001815865      | 55  |
| SF3KA14007B  | ORS-TM07-269 | Streptococcus_oralis                             | 99.76    | Bacillota      | Streptococcus  | Streptococcus mitis_AZ       | 11  |
| SF3KA14008B  | ORS-TM07-270 | Granulicatella_adiacens                          | 100.00   | Bacillota      | Granulicatella | 0                            | 34  |
| SF3KA15001A  | ORS-AM08-46  | Granulicatella_adiacens                          | 99.72    | Bacillota      | Granulicatella | Granulicatella sp001058355   | 106 |
| SF3KA15002AB | ORS-AM08-79  | Atopobium_parvulum                               | 99.65    | Actinomycetota | Lancefieldella | Lancefieldella sp000564995   | 26  |
| SF3KA15003A  | ORS-AM08-48  | Granulicatella_adiacens                          | 99.72    | Bacillota      | Granulicatella | Granulicatella sp001058355   | 106 |
| SF3KA15003AB | ORS-AM08-180 | Prevotella_veroralis                             | 98.31    | Bacteroidota   | Prevotella     | Prevotella sp000257925       | 62  |
| SF3KA15004A  | ORS-AM08-49  | Streptococcus_australis                          | 99.38    | Bacillota      | Streptococcus  | 0                            | 60  |
| SF3KA15005A  | ORS-AM08-163 | Streptococcus_sanguinis                          | 98.09    | Bacillota      | Streptococcus  | 0                            | 40  |
| SF3KA16005   | ORS-AF06-137 | Rothia_mucilaginoso                              | 99.58    | Actinomycetota | Rothia         | Rothia mucilaginoso_B        | 59  |
| SF3KC09001   | ODP-AF04-107 | Streptococcus_salivarius                         | 100.00   | Bacillota      | Streptococcus  | Streptococcus salivarius     | 4   |
| SF3KC09001A  | ODP-AF04-166 | Streptococcus_sanguinis                          | 99.79    | Bacillota      | Streptococcus  | Streptococcus sanguinis_H    | 3   |
| SF3KC09002   | ODP-AF04-108 | Streptococcus_salivarius                         | 96.66    | Bacillota      | Streptococcus  | Streptococcus salivarius     | 4   |
| SF3KC10002   | ODP-AF05-197 | Rothia_dentocariosa                              | 100.00   | Actinomycetota | Rothia         | Rothia dentocariosa          | 13  |
| SF3KC10002A  | ODP-AF05-91  | Lactococcus_lactis<br>/Actinomyces_odontolyticus | 100/95.7 | Actinomycetota | Pauljensenia   | Pauljensenia sp001064145     | 42  |
| SF3KC10006A  | ODP-AF05-95  | Atopobium_parvulum                               | 99.72    | Actinomycetota | Lancefieldella | 0                            | 2   |
| SF3KC10008   | ODP-AF05-203 | Streptococcus_anginosus                          | 99.59    | Bacillota      | Streptococcus  | Streptococcus anginosus      | 61  |
| SF3KC11001A  | ODP-AM04-51  | Gemella_haemolysans                              | 99.79    | Bacillota      | Gemella        | Gemella haemolysans_A        | 151 |
| SF3KC11002   | ODP-AM04-150 | Rothia_mucilaginoso                              | 99.44    | Actinomycetota | Rothia         | Rothia mucilaginoso_B        | 59  |
| SF3KC11002A  | ODP-AM04-52  | Granulicatella_adiacens                          | 99.72    | Bacillota      | Granulicatella | 0                            | 34  |
| SF3KC11004A  | ODP-AM04-126 | Neisseria_cinerea                                | 97.94    | Pseudomonadota | Neisseria      | Neisseria flavescens_B       | 15  |
| SF3KC12001   | ODP-AM05-46  | Neisseria_cinerea                                | 98.56    | Pseudomonadota | Neisseria      | Neisseria subflava           | 15  |
| SF3KC12002A  | ODP-AM05-252 | Streptococcus_pseudopneumoniae                   | 99.50    | Bacillota      | Streptococcus  | 0                            | 101 |
| SF3KC12002AB | ODP-AM05-394 | Streptococcus_sinensis                           | 99.72    | Bacillota      | Streptococcus  | Streptococcus sinensis       | 24  |
| SF3KC12003AB | ODP-AM05-395 | Streptococcus_constellatus                       | 99.12    | Bacillota      | Streptococcus  | Streptococcus constellatus   | 46  |
| SF3KC12004   | ODP-AM05-49  | Streptococcus_mitis                              | 99.79    | Bacillota      | Streptococcus  | Streptococcus mitis_AZ       | 11  |
| SF3KC12004AB | ODP-AM05-396 | Fusobacterium_nucleatum                          | 99.85    | Fusobacteriota | Fusobacterium  | Fusobacterium polymorphum    | 87  |
| SF3KC12005AB | ODP-AM05-464 | Leptotrichia_wadei                               | 98.04    | Fusobacteriota | Leptotrichia   | Leptotrichia wadei_A         | 152 |
| SF3KC13002A  | ODP-TM06-166 | Actinomyces_odontolyticus                        | 98.86    | Actinomycetota | Pauljensenia   | Pauljensenia odontolytica_A  | 27  |
| SF3KC13003A  | ODP-TM06-167 | Actinomyces_odontolyticus                        | 96.81    | Actinomycetota | Pauljensenia   | Pauljensenia sp000185285     | 153 |
| SF3KC14001B  | ODP-TM07-212 | Streptococcus_oralis                             | 99.84    | Bacillota      | Streptococcus  | Streptococcus mitis_AZ       | 11  |
| SF3KC15002   | ODP-AM08-250 | Rothia_dentocariosa                              | 99.93    | Actinomycetota | Rothia         | Rothia dentocariosa          | 13  |
| SF3KC15004A  | ODP-AM08-316 | Abiotrophia_defectiva                            | 99.66    | Bacillota      | Abiotrophia    | Abiotrophia defectiva        | 37  |
| SF3KC15013A  | ODP-AM08-325 | Granulicatella_adiacens                          | 100.00   | Bacillota      | Granulicatella | Granulicatella adiacens      | 23  |
| SF3KC16006   | ODP-AF06-107 | Streptococcus_oralis                             | 99.32    | Bacillota      | Streptococcus  | 0                            | 154 |
| SF3KT08005A  | ORT-AF03-190 | Atopobium_parvulum                               | 99.58    | Actinomycetota | Lancefieldella | 0                            | 155 |
| SF3KT09001   | ORT-AF04-29  | Streptococcus_salivarius                         | 100.00   | Bacillota      | Streptococcus  | Streptococcus salivarius     | 4   |
| SF3KT09001A  | ORT-AF04-121 | Streptococcus_salivarius                         | 99.82    | Bacillota      | Streptococcus  | Streptococcus salivarius     | 4   |
| SF3KT09002   | ORT-AF04-30  | Streptococcus_salivarius                         | 99.86    | Bacillota      | Streptococcus  | Streptococcus salivarius     | 4   |
| SF3KT09003A  | ORT-AF04-228 | Streptococcus_salivarius                         | 100.00   | Bacillota      | Streptococcus  | Streptococcus salivarius     | 4   |
| SF3KT09004A  | ORT-AF04-248 | Granulicatella_adiacens                          | 93.00    | Bacillota      | Granulicatella | Granulicatella sp001058355   | 95  |
| SF3KT10004A  | ORT-AF05-139 | Atopobium_parvulum                               | 99.72    | Actinomycetota | Lancefieldella | 0                            | 96  |
| SF3KT10008A  | ORT-AF05-234 | Actinomyces_odontolyticus                        | 99.29    | Actinomycetota | Pauljensenia   | Pauljensenia sp001064145     | 42  |
| SF3KT11001   | ORT-AM04-26  | Rothia_mucilaginoso                              | 99.58    | Actinomycetota | Rothia         | Rothia mucilaginoso_B        | 59  |
| SF3KT11002A  | ORT-AM04-73  | Granulicatella_adiacens                          | 99.92    | Bacillota      | Granulicatella | Granulicatella adiacens      | 23  |
| SF3KT11005A  | ORT-AM04-81  | Granulicatella_adiacens                          | 93.62    | Bacillota      | Granulicatella | Granulicatella adiacens      | 23  |
| SF3KT12001AB | ORT-AM05-107 | Granulicatella_adiacens                          | 99.66    | Bacillota      | Granulicatella | 0                            | 25  |
| SF3KT12001B  | ORT-AM05-308 | Rothia_mucilaginoso                              | 99.44    | Actinomycetota | Rothia         | Rothia mucilaginoso_B        | 59  |
| SF3KT12002A  | ORT-AM05-404 | Veillonella_tobetsuensis                         | 99.52    | Bacillota      | Veillonella    | Veillonella parvula_A        | 92  |
| SF3KT12002AB | ORT-AM05-108 | Streptococcus_salivarius                         | 99.86    | Bacillota      | Streptococcus  | Streptococcus salivarius     | 4   |
| SF3KT12003AB | ORT-AM05-109 | Granulicatella_adiacens                          | 99.66    | Bacillota      | Granulicatella | 0                            | 25  |
| SF3KT13001A  | ORT-TM06-205 | Streptococcus_salivarius                         | 100.00   | Bacillota      | Streptococcus  | Streptococcus salivarius     | 4   |
| SF3KT13003A  | ORT-TM06-207 | Prevotella_melaninogenica                        | 99.29    | Bacteroidota   | Prevotella     | Prevotella sp000257925       | 62  |

|             |                    |                                                                          |               |                |                     |                                 |     |
|-------------|--------------------|--------------------------------------------------------------------------|---------------|----------------|---------------------|---------------------------------|-----|
| SF3KT13004A | ORT-TM06-208       | Atopobium parvulum                                                       | 99.72         | Actinomycetota | Lancefieldella      | 0                               | 149 |
| SF3KT13006A | ORT-TM06-210       | Prevotella histicola                                                     | 99.38         | Bacteroidota   | Prevotella          | Prevotella histicola            | 28  |
| SF3KT13007A | ORT-TM06-211       | Actinomyces odontolyticus                                                | 98.37         | Actinomycetota | Pauljensenia        | Pauljensenia sp000466265        | 105 |
| SF3KT13008A | ORT-TM06-212       | Prevotella histicola                                                     | 99.89         | Bacteroidota   | Prevotella          | Prevotella histicola            | 28  |
| SF3KT13012A | ORT-TM06-249       | Granulicatella adiacens                                                  | 99.72         | Bacillota      | Granulicatella      | Granulicatella sp015264885      | 103 |
| SF3KT14001B | ORT-TM07-208       | Rothia mucilaginoso                                                      | 99.51         | Actinomycetota | Rothia              | Rothia mucilaginoso_B           | 59  |
| SF3KT15002  | ORT-AM08-487       | Rothia mucilaginoso                                                      | 99.58         | Actinomycetota | Rothia              | Rothia mucilaginoso             | 78  |
| SF3KT16002  | ORT-AF06-16        | Streptococcus infantis                                                   | 99.38         | Bacillota      | Streptococcus       | Streptococcus infantis_H        | 73  |
| SF3KT16005  | ORT-AF06-19        | Microbacterium oxydans                                                   | 99.79         | Actinomycetota | Microbacterium      | Microbacterium algeriense       | 12  |
| SF3KT16008  | ORT-AF06-143       | Rothia mucilaginoso                                                      | 99.58         | Actinomycetota | Rothia              | Rothia mucilaginoso             | 78  |
| T2011065150 | ORS-AM09-1-2-O-BH  | Streptococcus mitis                                                      | 99.31         | Bacillota      | Streptococcus       | 0                               | 156 |
| T2011065152 | ORS-AM09-3-O-BH    | Actinomyces naeslundii                                                   | 96.83         | Actinomycetota | Actinomyces         | Actinomyces oris_A              | 58  |
| T2011065153 | ORS-AM09-4-O-BH    | Streptococcus parasanguinis                                              | 99.79         | Bacillota      | Streptococcus       | Streptococcus parasanguinis     | 20  |
| T2011065154 | ORS-AM09-5-O-BH    | Streptococcus parasanguinis                                              | 98.50         | Bacillota      | Streptococcus       | Streptococcus parasanguinis_C   | 53  |
| T2011065155 | ORS-AM09-6-O-BH    | Streptococcus parasanguinis                                              | 99.79         | Bacillota      | Streptococcus       | Streptococcus parasanguinis     | 20  |
| T2011065157 | ORS-AM09-8-O-BH    | Streptococcus pseudopneumoniae                                           | 99.79         | Bacillota      | Streptococcus       | Streptococcus symci             | 157 |
| T2011065158 | ORS-AM09-9-O-BH    | Streptococcus pseudopneumoniae                                           | 99.79         | Bacillota      | Streptococcus       | Streptococcus symci             | 157 |
| T2011065159 | ORS-AM09-10-O-BH   | Streptococcus pseudopneumoniae                                           | 99.79         | Bacillota      | Streptococcus       | Streptococcus symci             | 157 |
| T2011065161 | ORS-AM09-12-2-O-BH | Streptococcus parasanguinis                                              | 99.11         | Bacillota      | Streptococcus       | Streptococcus sp001813295       | 6   |
| T2011065165 | ORS-AM09-16-O-BH   | Neisseria macacae /Gemella haemolysans                                   | 99.86/98.58   | Pseudomonadota | Neisseria           | Neisseria sicca_D               | 136 |
| T2011065166 | ORS-AM09-17-O-BH   | Streptococcus pseudopneumoniae                                           | 99.79         | Bacillota      | Streptococcus       | Streptococcus symci             | 157 |
| T2011065167 | ORS-AM09-18-O-BH   | Streptococcus parasanguinis                                              | 99.04         | Bacillota      | Streptococcus       | Streptococcus sp001813295       | 6   |
| T2011065168 | ORS-AM09-19-O-BH   | Streptococcus pseudopneumoniae                                           | 99.65         | Bacillota      | Streptococcus       | 0                               | 158 |
| T2011065169 | ORS-AM09-20-O-BH   | Streptococcus cristatus                                                  | 99.45         | Bacillota      | Streptococcus       | Streptococcus cristatus         | 36  |
| T2011065170 | ORS-AM09-22-O-BH   | Streptococcus infantis                                                   | 99.38         | Bacillota      | Streptococcus       | Streptococcus infantis_H        | 73  |
| T2011065171 | ORS-AM09-23-O-BH   | Actinomyces naeslundii                                                   | 97.10         | Actinomycetota | Actinomyces         | Actinomyces oris                | 39  |
| T2011065172 | ORS-AM09-24-O-BH   | Streptococcus oralis                                                     | 98.97         | Bacillota      | Streptococcus       | Streptococcus infantis_B        | 159 |
| T2011065173 | ORS-AM09-25-O-BH   | Rothia mucilaginoso                                                      | 99.24         | Actinomycetota | Rothia              | Rothia mucilaginoso_B           | 59  |
| T2011065174 | ORS-AM09-26-O-BH   | Streptococcus parasanguinis                                              | 99.04         | Bacillota      | Streptococcus       | Streptococcus sp001813295       | 6   |
| T2011065176 | ORS-AM09-28-O-BH   | Streptococcus parasanguinis /Haemophilus parainfluenzae                  | 99.25/99.24   | Bacillota      | Streptococcus       | Streptococcus sp001813295       | 6   |
| T2011065177 | ORS-AM09-29-O-BH   | Streptococcus parasanguinis                                              | 99.79         | Bacillota      | Streptococcus       | Streptococcus parasanguinis     | 20  |
| T2011065178 | ORS-AM09-30-O-BH   | Actinomyces naeslundii                                                   | 99.03         | Actinomycetota | Actinomyces         | Actinomyces oris                | 39  |
| T2011065179 | ORS-AM09-31-1-O-BH | Neisseria subflava                                                       | 100.00        | Pseudomonadota | Neisseria           | Neisseria flavescens_B          | 15  |
| T2011065180 | ORS-AM09-31-2-O-BH | Neisseria subflava                                                       | 100.00        | Pseudomonadota | Neisseria           | Neisseria flavescens_B          | 15  |
| T2011065182 | ORS-AM09-33-O-BH   | Streptococcus salivarius                                                 | 100.00        | Bacillota      | Streptococcus       | Streptococcus salivarius        | 4   |
| T2011065185 | ORS-AM09-36-O-BH   | Streptococcus parasanguinis                                              | 98.44         | Bacillota      | Streptococcus       | Streptococcus sp900766505       | 6   |
| T2011065187 | ORS-AM09-39-O-BH   | Streptococcus oralis                                                     | 98.50         | Bacillota      | Streptococcus       | Streptococcus infantis_B        | 159 |
| T2011065188 | ORS-AM09-40-O-BH   | Streptococcus oralis                                                     | 99.31         | Bacillota      | Streptococcus       | 0                               | 160 |
| T2011065189 | ORS-AM09-41-O-BH   | Neisseria subflava                                                       | 100.00        | Pseudomonadota | Neisseria           | Neisseria flavescens_B          | 15  |
| T2011065191 | ORS-AM09-43-O-BH   | Streptococcus mitis                                                      | 99.31         | Bacillota      | Streptococcus       | Streptococcus oralis_BD         | 79  |
| T2011065192 | ORS-AM09-45-O-BH   | Streptococcus mitis                                                      | 99.86         | Bacillota      | Streptococcus       | 0                               | 161 |
| T2011065196 | ODP-AM09-1-1-O-BH  | Streptococcus oralis                                                     | 99.65         | Bacillota      | Streptococcus       | 0                               | 162 |
| T2011065197 | ODP-AM09-1-2-O-BH  | Streptococcus oralis                                                     | 99.65         | Bacillota      | Streptococcus       | 0                               | 162 |
| T2011065200 | ODP-AM09-3-O-BH    | Actinomyces naeslundii                                                   | 98.97         | Actinomycetota | Actinomyces         | Actinomyces oris_A              | 58  |
| T2011065201 | ODP-AM09-4-O-BH    | Streptococcus sanguinis                                                  | 99.72         | Bacillota      | Streptococcus       | Streptococcus sanguinis_H       | 3   |
| T2011065202 | ODP-AM09-5-O-BH    | Streptococcus sanguinis                                                  | 99.72         | Bacillota      | Streptococcus       | Streptococcus sanguinis_H       | 3   |
| T2011065206 | ODP-AM09-9-O-BH    | Streptococcus pseudopneumoniae                                           | 99.79         | Bacillota      | Streptococcus       | Streptococcus symci             | 157 |
| T2011065207 | ODP-AM09-10-O-BH   | Streptococcus oralis /Granulicatella adiacens                            | 98.57/99.72   | Bacillota      | Streptococcus       | Streptococcus infantis_B        | 159 |
| T2011065209 | ODP-AM09-12-O-BH   | Streptococcus pseudopneumoniae                                           | 99.79         | Bacillota      | Streptococcus       | Streptococcus symci             | 157 |
| T2011065210 | ODP-AM09-13-O-BH   | Streptococcus gordonii                                                   | 99.66         | Bacillota      | Streptococcus       | Streptococcus gordonii          | 63  |
| T2011065213 | ODP-AM09-16-O-BH   | Streptococcus mitis                                                      | 99.59         | Bacillota      | Streptococcus       | Streptococcus oralis_BA         | 163 |
| T2011065214 | ODP-AM09-17-O-BH   | Streptococcus parasanguinis                                              | 99.04         | Bacillota      | Streptococcus       | Streptococcus sp001813295       | 6   |
| T2011065216 | ODP-AM09-19-O-BH   | Bacillus thuringiensis                                                   | 100.00        | Bacillota      | Bacillus_A          | Bacillus_A mobilis              | 164 |
| T2011065217 | ODP-AM09-20-O-BH   | Streptococcus pseudopneumoniae                                           | 99.79         | Bacillota      | Streptococcus       | Streptococcus symci             | 157 |
| T2011065220 | ODP-AM09-23-O-BH   | Streptococcus parasanguinis                                              | 99.04         | Bacillota      | Streptococcus       | Streptococcus sp001813295       | 6   |
| T2011065222 | ODP-AM09-25-O-BH   | #N/A                                                                     | #N/A          | Bacillota      | Streptococcus       | Streptococcus sp001813295       | 6   |
| T2011065225 | ODP-AM09-28-O-BH   | Actinomyces naeslundii                                                   | 96.83         | Actinomycetota | Actinomyces         | Actinomyces oris_A              | 58  |
| T2011065226 | ODP-AM09-29-O-BH   | Streptococcus sanguinis                                                  | 99.93         | Bacillota      | Streptococcus       | Streptococcus sanguinis         | 3   |
| T2011065228 | ODP-AM09-31-O-BH   | Streptococcus gordonii                                                   | 99.66         | Bacillota      | Streptococcus       | Streptococcus gordonii          | 63  |
| T2011065230 | ODP-AM09-33-O-BH   | Streptococcus gordonii                                                   | 99.66         | Bacillota      | Streptococcus       | Streptococcus gordonii          | 63  |
| T2011065231 | ODP-AM09-34-O-BH   | Actinomyces naeslundii                                                   | 97.10         | Actinomycetota | Actinomyces         | Actinomyces oris                | 39  |
| T2011065233 | ODP-AM09-36-O-BH   | Streptococcus pseudopneumoniae /Gemella haemolysans /Streptococcus mitis | 100/82.64/100 | Bacillota      | Streptococcus       | Streptococcus symci             | 157 |
| T2011065234 | ODP-AM09-37-O-BH   | Streptococcus oralis                                                     | 99.25         | Bacillota      | Streptococcus       | 0                               | 120 |
| T2011065235 | ODP-AM09-38-O-BH   | Streptococcus pseudopneumoniae                                           | 99.79         | Bacillota      | Streptococcus       | Streptococcus symci             | 157 |
| T2011065236 | ODP-AM09-39-O-BH   | Streptococcus pseudopneumoniae                                           | 95.23         | Bacillota      | Streptococcus       | Streptococcus mitis_AC          | 85  |
| T2011065238 | ODP-AM09-41-O-BH   | Streptococcus rubneri                                                    | 99.17         | Bacillota      | Streptococcus       | Streptococcus xiaochunlingii    | 5   |
| T2011065239 | ODP-AM09-42-O-BH   | Streptococcus pseudopneumoniae                                           | 99.79         | Bacillota      | Streptococcus       | Streptococcus symci             | 157 |
| T2011065241 | ODP-AM09-44-O-BH   | Actinomyces naeslundii                                                   | 99.13         | Actinomycetota | Actinomyces         | Actinomyces oris_A              | 58  |
| T2011065242 | ODP-AM09-45-O-BH   | Streptococcus pseudopneumoniae                                           | 99.79         | Bacillota      | Streptococcus       | Streptococcus symci             | 157 |
| T2011065243 | ODP-AM09-46-O-BH   | Streptococcus mitis                                                      | 99.59         | Bacillota      | Streptococcus       | Streptococcus oralis_BA         | 163 |
| T2011065244 | ODP-AM09-47-O-BH   | Streptococcus pseudopneumoniae                                           | 99.79         | Bacillota      | Streptococcus       | Streptococcus symci             | 157 |
| T2011065245 | ODP-AM09-48-O-BH   | Streptococcus gordonii                                                   | 99.66         | Bacillota      | Streptococcus       | Streptococcus gordonii          | 63  |
| T2011065246 | ODP-AM09-49-O-BH   | Streptococcus mitis                                                      | 99.31         | Bacillota      | Streptococcus       | Streptococcus oralis_BD         | 79  |
| T2011068060 | ORS-AM09-2-BH      | Actinomyces odontolyticus                                                | 99.08         | Actinomycetota | Pauljensenia        | Pauljensenia sp001064145        | 42  |
| T2011068063 | ORS-AM09-5-BH      | Lachnoanaerobaculum umeaense                                             | 94.80         | Bacillota      | Lachnoanaerobaculum | Lachnoanaerobaculum sp000296385 | 165 |
| T2011068065 | ORS-AM09-7-BH      | Granulicatella adiacens                                                  | 99.72         | Bacillota      | Granulicatella      | Granulicatella sp001058355      | 95  |
| T2011068069 | ORS-AM09-12-BH     | Actinomyces odontolyticus                                                | 99.08         | Actinomycetota | Pauljensenia        | Pauljensenia sp001064145        | 42  |
| T2011068071 | ORS-AM09-16-BH     | Streptococcus mitis                                                      | 99.59         | Bacillota      | Streptococcus       | Streptococcus oralis_BA         | 163 |
| T2011068073 | ORS-AM09-18-BH     | Actinomyces odontolyticus                                                | 99.13         | Actinomycetota | Pauljensenia        | Pauljensenia sp000411415        | 166 |
| T2011068074 | ORS-AM09-19-BH     | Gemella sanguinis                                                        | 99.86         | Bacillota      | Gemella             | Gemella sanguinis               | 17  |
| T2011068075 | ORS-AM09-20-BH     | Streptococcus salivarius                                                 | 99.86         | Bacillota      | Streptococcus       | Streptococcus salivarius        | 4   |
| T2011068076 | ORS-AM09-22-BH     | Actinomyces odontolyticus /Enterococcus faecium /Enterococcus durans     | 98.73/99.42   | Actinomycetota | Pauljensenia        | Pauljensenia sp000278725        | 121 |
| T2011068079 | ORS-AM09-26-BH     | /Actinomyces odontolyticus                                               | 74.08/98.37   | Actinomycetota | Pauljensenia        | 0                               | 167 |

|             |                   |                                                            |             |                |                |                               |     |
|-------------|-------------------|------------------------------------------------------------|-------------|----------------|----------------|-------------------------------|-----|
| T2011068080 | ORS-AM09-27-BH    | Streptococcus_sanguinis                                    | 99.72       | Bacillota      | Streptococcus  | Streptococcus sanguinis_H     | 3   |
| T2011068081 | ORS-AM09-28-BH    | Streptococcus_australis                                    | 99.38       | Bacillota      | Streptococcus  | Streptococcus sp004166885     | 98  |
| T2011068082 | ORS-AM09-29-BH    | Actinomyces_naeslundii                                     | 99.36       | Actinomycetota | Actinomyces    | Actinomyces oris_A            | 58  |
| T2011068083 | ORS-AM09-30-BH    | Streptococcus_salivarius                                   | 99.86       | Bacillota      | Streptococcus  | Streptococcus salivarius      | 4   |
| T2011068084 | ORS-AM09-31-BH    | Actinomyces_odontolyticus                                  | 98.44       | Actinomycetota | Pauljensenia   | Pauljensenia sp000466265      | 105 |
| T2011068085 | ORS-AM09-32-BH    | Gemella_haemolysans                                        | 99.93       | Bacillota      | Gemella        | Gemella haemolysans_B         | 49  |
| T2011068087 | ODP-AM09-1-BH     | Streptococcus_pseudopneumoniae                             | 99.79       | Bacillota      | Streptococcus  | Streptococcus symci           | 157 |
| T2011068089 | ODP-AM09-3-BH     | Streptococcus_pseudopneumoniae                             | 99.79       | Bacillota      | Streptococcus  | Streptococcus symci           | 157 |
| T2011068093 | ODP-AM09-7-BH     | Streptococcus_pseudopneumoniae                             | 99.79       | Bacillota      | Streptococcus  | Streptococcus symci           | 157 |
| T2011068096 | ODP-AM09-11-BH    | Streptococcus_gordonii                                     | 99.66       | Bacillota      | Streptococcus  | Streptococcus gordonii        | 63  |
| T2011068099 | ODP-AM09-14-BH    | Streptococcus_cristatus                                    | 99.65       | Bacillota      | Streptococcus  | 0                             | 168 |
| T2011068107 | ODP-AM09-22-BH    | Streptococcus_pseudopneumoniae                             | 99.79       | Bacillota      | Streptococcus  | Streptococcus symci           | 157 |
| T2011068108 | ODP-AM09-23-BH    | Streptococcus_mitis                                        | 99.65       | Bacillota      | Streptococcus  | Streptococcus oralis          | 107 |
| T2011068109 | ODP-AM09-24-BH    | Streptococcus_pseudopneumoniae                             | 99.79       | Bacillota      | Streptococcus  | Streptococcus symci           | 157 |
| T2011068112 | ODP-AM09-27-BH    | Streptococcus_mitis                                        | 99.86       | Bacillota      | Streptococcus  | 0                             | 161 |
| T2011068113 | ODP-AM09-30-BH    | Streptococcus_parasanguinis                                | 98.50       | Bacillota      | Streptococcus  | Streptococcus parasanguinis_C | 53  |
| T2011068114 | ODP-AM09-32-BH    | Streptococcus_pseudopneumoniae                             | 99.79       | Bacillota      | Streptococcus  | Streptococcus symci           | 157 |
| T2011068115 | ODP-AM09-33-BH    | Streptococcus_mitis                                        | 99.45       | Bacillota      | Streptococcus  | Streptococcus mitis_AW        | 169 |
| T2011068116 | ODP-AM09-34-BH    | Streptococcus_constellatus                                 | 99.12       | Bacillota      | Streptococcus  | Streptococcus constellatus    | 46  |
| T2011068119 | ODP-AM09-37-BH    | Actinomyces_odontolyticus                                  | 98.86       | Actinomycetota | Pauljensenia   | Pauljensenia odontolytica_A   | 27  |
| T2011068120 | ODP-AM09-39-BH    | Streptococcus_gordonii                                     | 99.66       | Bacillota      | Streptococcus  | Streptococcus gordonii        | 63  |
| T2011068121 | ODP-AM09-41-BH    | Actinomyces_naeslundii                                     | 99.13       | Actinomycetota | Actinomyces    | Actinomyces oris              | 39  |
| T2011068122 | ODP-AM09-43-BH    | Streptococcus_gordonii                                     | 99.66       | Bacillota      | Streptococcus  | Streptococcus gordonii        | 63  |
| T2101076727 | ORT-AM09-2-O-104  | Streptococcus_pseudopneumoniae                             | 99.52       | Bacillota      | Streptococcus  | 0                             | 170 |
| T2101076728 | ORT-AM09-3-O-104  | Streptococcus_pseudopneumoniae                             | 99.79       | Bacillota      | Streptococcus  | Streptococcus symci           | 157 |
| T2101076730 | ORT-AM09-5-O-104  | Streptococcus_parasanguinis                                | 98.57       | Bacillota      | Streptococcus  | Streptococcus parasanguinis_C | 53  |
| T2101076731 | ORT-AM09-6-O-104  | Streptococcus_mitis                                        | 99.04       | Bacillota      | Streptococcus  | Streptococcus oralis_K        | 79  |
| T2101076732 | ORT-AM09-7-O-104  | Streptococcus_sanguinis                                    | 99.86       | Bacillota      | Streptococcus  | Streptococcus sanguinis_H     | 3   |
| T2101076733 | ORT-AM09-8-O-104  | Streptococcus_infantis                                     | 99.59       | Bacillota      | Streptococcus  | 0                             | 154 |
| T2101076734 | ORT-AM09-9-O-104  | Streptococcus_mitis                                        | 99.11       | Bacillota      | Streptococcus  | 0                             | 171 |
| T2101076735 | ORT-AM09-10-O-104 | Granulicatella_adiacens                                    | 95.65       | Bacillota      | Granulicatella | 0                             | 77  |
| T2101076737 | ORT-AM09-12-O-104 | Streptococcus_timonensis                                   | 99.04       | Bacillota      | Streptococcus  | 0                             | 127 |
| T2101076738 | ORT-AM09-13-O-104 | Streptococcus_australis                                    | 99.76       | Bacillota      | Streptococcus  | 0                             | 68  |
| T2101076739 | ORT-AM09-14-O-104 | Streptococcus_australis                                    | 96.46       | Bacillota      | Streptococcus  | Streptococcus koreensis       | 48  |
| T2101076741 | ORT-AM09-18-O-104 | Streptococcus_mitis                                        | 99.31       | Bacillota      | Streptococcus  | 0                             | 172 |
| T2101076743 | ORT-AM09-20-O-104 | Streptococcus_infantis                                     | 99.59       | Bacillota      | Streptococcus  | 0                             | 154 |
| T2101076744 | ORT-AM09-21-O-104 | Streptococcus_oralis                                       | 99.91       | Bacillota      | Streptococcus  | Streptococcus oralis_AC       | 173 |
| T2101076745 | ORT-AM09-22-O-104 | Streptococcus_mitis                                        | 99.65       | Bacillota      | Streptococcus  | Streptococcus oralis          | 107 |
| T2101076746 | ORT-AM09-23-O-104 | Streptococcus_australis                                    | 99.72       | Bacillota      | Streptococcus  | 0                             | 68  |
| T2101076747 | ORT-AM09-24-O-104 | Streptococcus_mitis                                        | 99.65       | Bacillota      | Streptococcus  | Streptococcus oralis          | 107 |
| T2101076748 | ORT-AM09-25-O-104 | Gemella_sanguinis                                          | 99.93       | Bacillota      | Gemella        | Gemella sanguinis             | 17  |
| T2101076749 | ORT-AM09-26-O-104 | Streptococcus_rubneri                                      | 99.90       | Bacillota      | Streptococcus  | 0                             | 68  |
| T2101076750 | ORT-AM09-28-O-104 | Streptococcus_rubneri                                      | 97.37       | Bacillota      | Streptococcus  | 0                             | 68  |
| T2101076751 | ORT-AM09-29-O-104 | Streptococcus_australis                                    | 99.14       | Bacillota      | Streptococcus  | Streptococcus koreensis       | 48  |
| T2101076754 | ODP-AM09-2-O-104  | Streptococcus_pseudopneumoniae                             | 99.52       | Bacillota      | Streptococcus  | 0                             | 170 |
| T2101076755 | ODP-AM09-3-O-104  | Streptococcus_pseudopneumoniae                             | 99.52       | Bacillota      | Streptococcus  | 0                             | 170 |
| T2101076756 | ODP-AM09-4-O-104  | Streptococcus_constellatus                                 | 99.12       | Bacillota      | Streptococcus  | Streptococcus constellatus    | 46  |
| T2101076757 | ODP-AM09-5-O-104  | Streptococcus_sanguinis                                    | 99.86       | Bacillota      | Streptococcus  | Streptococcus sanguinis_H     | 3   |
| T2101076758 | ODP-AM09-6-O-104  | Streptococcus_mitis                                        | 99.72       | Bacillota      | Streptococcus  | Streptococcus sp900555155     | 107 |
| T2101076761 | ODP-AM09-9-O-104  | Streptococcus_mitis                                        | 99.65       | Bacillota      | Streptococcus  | Streptococcus oralis          | 107 |
| T2101076762 | ODP-AM09-10-O-104 | Streptococcus_mitis                                        | 99.65       | Bacillota      | Streptococcus  | Streptococcus oralis          | 107 |
| T2101076764 | ODP-AM09-12-O-104 | Streptococcus_constellatus                                 | 99.86       | Bacillota      | Streptococcus  | Streptococcus constellatus    | 46  |
| T2101076767 | ODP-AM09-16-O-104 | Streptococcus_mitis                                        | 99.65       | Bacillota      | Streptococcus  | Streptococcus oralis          | 107 |
| T2101076768 | ODP-AM09-18-O-104 | Streptococcus_pseudopneumoniae                             | 99.79       | Bacillota      | Streptococcus  | Streptococcus symci           | 157 |
| T2101076769 | ODP-AM09-19-O-104 | Streptococcus_pseudopneumoniae                             | 99.79       | Bacillota      | Streptococcus  | Streptococcus symci           | 157 |
| T2101076770 | ODP-AM09-20-O-104 | Streptococcus_pseudopneumoniae                             | 99.52       | Bacillota      | Streptococcus  | 0                             | 170 |
| T2101076771 | ODP-AM09-21-O-104 | Streptococcus_mitis                                        | 99.65       | Bacillota      | Streptococcus  | Streptococcus sp900555155     | 107 |
| T2101076772 | ODP-AM09-22-O-104 | Streptococcus_mitis                                        | 99.65       | Bacillota      | Streptococcus  | Streptococcus sp900555155     | 107 |
| T2101076773 | ODP-AM09-23-O-104 | Streptococcus_mitis                                        | 99.65       | Bacillota      | Streptococcus  | Streptococcus oralis          | 107 |
| T2101076774 | ORS-AM09-1-O-104  | Streptococcus_mitis<br>/Streptococcus_timonensis           | 99.56/97.31 | Bacillota      | Streptococcus  | 0                             | 86  |
| T2101076775 | ORS-AM09-2-O-104  | Streptococcus_pseudopneumoniae                             | 99.79       | Bacillota      | Streptococcus  | 0                             | 174 |
| T2101076776 | ORS-AM09-3-O-104  | Streptococcus_australis                                    | 99.76       | Bacillota      | Streptococcus  | 0                             | 68  |
| T2101076777 | ORS-AM09-4-O-104  | Streptococcus_mitis                                        | 99.52       | Bacillota      | Streptococcus  | Streptococcus oralis          | 107 |
| T2101076780 | ORS-AM09-7-O-104  | Streptococcus_gordonii                                     | 99.59       | Bacillota      | Streptococcus  | Streptococcus gordonii        | 63  |
| T2101076781 | ORS-AM09-8-O-104  | Streptococcus_salivarius                                   | 100.00      | Bacillota      | Streptococcus  | Streptococcus salivarius      | 4   |
| T2101076782 | ORS-AM09-9-O-104  | Streptococcus_mitis                                        | 99.52       | Bacillota      | Streptococcus  | Streptococcus oralis          | 107 |
| T2101076783 | ORS-AM09-10-O-104 | Streptococcus_sanguinis                                    | 100.00      | Bacillota      | Streptococcus  | Streptococcus sanguinis_C     | 113 |
| T2101076784 | ORS-AM09-11-O-104 | Streptococcus_mitis                                        | 99.65       | Bacillota      | Streptococcus  | Streptococcus oralis          | 107 |
| T2101076786 | ORS-AM09-13-O-104 | Streptococcus_mitis                                        | 99.31       | Bacillota      | Streptococcus  | 0                             | 172 |
| T2101076787 | ORS-AM09-14-O-104 | Streptococcus_mitis                                        | 99.31       | Bacillota      | Streptococcus  | 0                             | 172 |
| T2101076788 | ORS-AM09-15-O-104 | Streptococcus_salivarius                                   | 99.86       | Bacillota      | Streptococcus  | Streptococcus salivarius      | 4   |
| T2101076789 | ORS-AM09-16-O-104 | Streptococcus_salivarius                                   | 100.00      | Bacillota      | Streptococcus  | Streptococcus salivarius      | 4   |
| T2101076791 | ORS-AM09-21-O-104 | Streptococcus_salivarius                                   | 99.86       | Bacillota      | Streptococcus  | Streptococcus salivarius      | 4   |
| T2101076792 | ORS-AM09-23-O-104 | Streptococcus_parasanguinis                                | 98.57       | Bacillota      | Streptococcus  | Streptococcus parasanguinis_C | 53  |
| T2101076793 | ORS-AM09-24-O-104 | Streptococcus_australis                                    | 99.45       | Bacillota      | Streptococcus  | 0                             | 68  |
| T2101076794 | ORS-AM09-27-O-104 | Streptococcus_mitis                                        | 99.65       | Bacillota      | Streptococcus  | Streptococcus oralis          | 107 |
| T2101076795 | ORS-AF08-1-MRS    | Streptococcus_oralis                                       | 99.32       | Bacillota      | Streptococcus  | 0                             | 120 |
| T2101076796 | ORS-AF08-2-MRS    | Streptococcus_salivarius                                   | 100.00      | Bacillota      | Streptococcus  | Streptococcus salivarius      | 4   |
| T2101076797 | ORS-AF08-3-MRS    | Granulicatella_adiacens                                    | 99.72       | Bacillota      | Granulicatella | 0                             | 77  |
| T2101076798 | ORS-AF08-4-MRS    | Streptococcus_mitis                                        | 99.65       | Bacillota      | Streptococcus  | Streptococcus oralis          | 107 |
| T2101076799 | ORS-AF08-5-MRS    | Streptococcus_salivarius                                   | 100.00      | Bacillota      | Streptococcus  | Streptococcus salivarius      | 4   |
| T2101076801 | ORS-AF08-7-MRS    | Streptococcus_salivarius                                   | 99.86       | Bacillota      | Streptococcus  | Streptococcus salivarius      | 4   |
| T2101076802 | ORS-AF08-8-MRS    | Granulicatella_adiacens<br>/Streptococcus_pseudopneumoniae | 99.66/99.52 | Bacillota      | Streptococcus  | 0                             | 170 |
| T2101076803 | ORS-AF08-9-MRS    | Prevotella_melaninogenica                                  | 99.68       | Bacteroidota   | Prevotella     | Prevotella melaninogenica     | 175 |
| T2101076804 | ORS-AF08-12-MRS   | Streptococcus_pseudopneumoniae                             | 99.79       | Bacillota      | Streptococcus  | Streptococcus symci           | 157 |



|             |                   |                                                       |             |                |                     |                                  |     |
|-------------|-------------------|-------------------------------------------------------|-------------|----------------|---------------------|----------------------------------|-----|
| T2101076805 | ORS-AF08-14-MRS   | Granulicatella_adiacens                               | 99.59       | Bacillota      | Granulicatella      | Granulicatella sp001058355       | 106 |
| T2101076807 | ORS-AF08-16-MRS   | Streptococcus_timonensis                              | 98.91       | Bacillota      | Streptococcus       | 0                                | 176 |
| T2101076808 | ORS-AF08-17-MRS   | Streptococcus_pseudopneumoniae                        | 99.79       | Bacillota      | Streptococcus       | Streptococcus symci              | 157 |
| T2101076809 | ORS-AF08-18-MRS   | Streptococcus_australis                               | 96.53       | Bacillota      | Streptococcus       | Streptococcus koreensis          | 48  |
| T2101076810 | ORS-AF08-19-MRS   | Prevotella_melaninogenica                             | 97.86       | Bacteroidota   | Prevotella          | Prevotella melaninogenica        | 175 |
| T2101076811 | ORS-AF08-20-MRS   | Streptococcus_salivarius                              | 99.86       | Bacillota      | Streptococcus       | Streptococcus salivarius         | 4   |
| T2101076813 | ORS-AF08-23-MRS   | Streptococcus_salivarius                              | 100.00      | Bacillota      | Streptococcus       | Streptococcus salivarius         | 4   |
| T2101076815 | ORS-AF08-25-MRS   | Streptococcus_australis                               | 96.53       | Bacillota      | Streptococcus       | Streptococcus koreensis          | 48  |
| T2101076817 | ORS-AF08-27-MRS   | Actinomyces_odontolyticus<br>/Granulicatella_adiacens | 98.86/99.72 | Bacillota      | Granulicatella      | Granulicatella sp001058355       | 106 |
| T2101076820 | ORS-AF08-30-MRS   | Streptococcus_salivarius                              | 100.00      | Bacillota      | Streptococcus       | Streptococcus salivarius         | 4   |
| T2101076821 | ODP-AF08-1-MRS    | Streptococcus_sanguinis                               | 99.86       | Bacillota      | Streptococcus       | Streptococcus sanguinis_H        | 3   |
| T2101076822 | ODP-AF08-2-MRS    | Streptococcus_anginosus                               | 99.66       | Bacillota      | Streptococcus       | Streptococcus anginosus_C        | 104 |
| T2101076825 | ODP-AF08-7-MRS    | Streptococcus_mitis                                   | 99.65       | Bacillota      | Streptococcus       | Streptococcus oralis             | 107 |
| T2101076826 | ODP-AF08-8-MRS    | Streptococcus_mitis                                   | 99.65       | Bacillota      | Streptococcus       | Streptococcus oralis             | 107 |
| T2101076827 | ODP-AF08-10-MRS   | Streptococcus_mitis                                   | 99.52       | Bacillota      | Streptococcus       | Streptococcus oralis             | 107 |
| T2101076828 | ODP-AF08-11-MRS   | Streptococcus_sanguinis                               | 99.93       | Bacillota      | Streptococcus       | Streptococcus sanguinis          | 3   |
| T2101076829 | ODP-AF08-13-MRS   | Streptococcus_constellatus                            | 99.86       | Bacillota      | Streptococcus       | Streptococcus constellatus       | 46  |
| T2101076831 | ODP-AF08-15-MRS   | Streptococcus_anginosus                               | 99.66       | Bacillota      | Streptococcus       | Streptococcus anginosus          | 61  |
| T2101076832 | ODP-AF08-16-MRS   | Streptococcus_constellatus                            | 99.86       | Bacillota      | Streptococcus       | Streptococcus constellatus       | 46  |
| T2101076833 | ODP-AF08-17-MRS   | Streptococcus_sanguinis                               | 100.00      | Bacillota      | Streptococcus       | Streptococcus sanguinis_C        | 113 |
| T2101076834 | ODP-AF08-18-MRS   | Streptococcus_sanguinis                               | 99.86       | Bacillota      | Streptococcus       | Streptococcus sanguinis_H        | 3   |
| T2101076835 | ODP-AF08-20-MRS   | Streptococcus_constellatus                            | 99.86       | Bacillota      | Streptococcus       | Streptococcus constellatus       | 46  |
| T2101076836 | ODP-AF08-21-MRS   | Streptococcus_mitis                                   | 99.52       | Bacillota      | Streptococcus       | Streptococcus oralis             | 107 |
| T2101076837 | ODP-AF08-22-MRS   | Veillonella_parvula                                   | 99.73       | Bacillota      | Veillonella         | Veillonella sp900757715          | 177 |
| T2101076838 | ODP-AF08-23-MRS   | Streptococcus_mitis                                   | 99.65       | Bacillota      | Streptococcus       | Streptococcus oralis             | 107 |
| T2101076840 | ODP-AF08-27-MRS   | Streptococcus_sanguinis                               | 99.86       | Bacillota      | Streptococcus       | Streptococcus sanguinis_H        | 3   |
| T2101076841 | ODP-AF08-28-MRS   | Granulicatella_adiacens                               | 88.51       | Bacillota      | Granulicatella      | Granulicatella adiacens          | 23  |
| T2101076844 | ODP-AF08-35-MRS   | Streptococcus_mitis                                   | 99.52       | Bacillota      | Streptococcus       | Streptococcus oralis             | 107 |
| T2101076845 | ODP-AF08-36-MRS   | Streptococcus_mitis                                   | 99.65       | Bacillota      | Streptococcus       | Streptococcus oralis             | 107 |
| T2101076846 | ODP-AF08-37-MRS   | Granulicatella_adiacens                               | 99.86       | Bacillota      | Granulicatella      | Granulicatella adiacens          | 23  |
| T2101076847 | ODP-AF08-38-MRS   | Streptococcus_oralis                                  | 99.70       | Bacillota      | Streptococcus       | Streptococcus mitis_AZ           | 11  |
| T2101076848 | ODP-AF08-39-MRS   | Streptococcus_pseudopneumoniae                        | 99.52       | Bacillota      | Streptococcus       | 0                                | 170 |
| T2101076849 | ODP-AF08-40-MRS   | Streptococcus_constellatus                            | 99.86       | Bacillota      | Streptococcus       | Streptococcus constellatus       | 46  |
| T2101076850 | ODP-AF08-41-MRS   | Streptococcus_mitis                                   | 99.65       | Bacillota      | Streptococcus       | Streptococcus oralis             | 107 |
| T2101076851 | ODP-AF08-42-MRS   | Streptococcus_pseudopneumoniae                        | 99.52       | Bacillota      | Streptococcus       | 0                                | 170 |
| T2101076854 | ORT-AF08-11-MRS   | Veillonella_atypica                                   | 99.52       | Bacillota      | Veillonella         | Veillonella atypica              | 178 |
| T2101076857 | ORT-AF08-19-MRS   | Streptococcus_sanguinis                               | 99.86       | Bacillota      | Streptococcus       | Streptococcus sanguinis_H        | 3   |
| T2101076858 | ORT-AF08-24-MRS   | Streptococcus_salivarius                              | 99.86       | Bacillota      | Streptococcus       | Streptococcus salivarius         | 4   |
| T2101076859 | ORT-AF08-28-MRS   | Streptococcus_constellatus                            | 99.86       | Bacillota      | Streptococcus       | Streptococcus constellatus       | 46  |
| T2101076860 | ORT-AF08-32-MRS   | Streptococcus_constellatus                            | 99.86       | Bacillota      | Streptococcus       | Streptococcus constellatus       | 46  |
| T2101076861 | ORT-AF08-34-MRS   | Streptococcus_mitis                                   | 99.52       | Bacillota      | Streptococcus       | Streptococcus oralis             | 107 |
| T2101076862 | ORT-AF08-35-MRS   | Streptococcus_parasanguinis                           | 98.57       | Bacillota      | Streptococcus       | Streptococcus parasanguinis_C    | 53  |
| T2101076866 | ORT-AF08-43-MRS   | Streptococcus_mitis                                   | 99.65       | Bacillota      | Streptococcus       | Streptococcus sp900555155        | 107 |
| T2101078470 | ORT-AM09-5D4      | Veillonella_atypica                                   | 99.12       | Bacillota      | Veillonella         | 0                                | 179 |
| T2101078472 | ORT-AM09-5D6      | Bifidobacterium_dentium                               | 99.58       | Actinomycetota | Bifidobacterium     | Bifidobacterium dentium          | 180 |
| T2101078474 | ODP-AM09-2D1      | Streptococcus_salivarius                              | 99.86       | Bacillota      | Streptococcus       | Streptococcus salivarius         | 4   |
| T2101078475 | ODP-AM09-2D2      | Streptococcus_salivarius                              | 99.86       | Bacillota      | Streptococcus       | Streptococcus salivarius         | 4   |
| T2101078477 | ODP-AM09-2D4A     | Streptococcus_salivarius                              | 99.86       | Bacillota      | Streptococcus       | Streptococcus salivarius         | 4   |
| T2101078478 | ODP-AM09-2D4B     | Streptococcus_salivarius                              | 99.86       | Bacillota      | Streptococcus       | Streptococcus salivarius         | 4   |
| T2101078479 | ODP-AM09-2D5      | Streptococcus_salivarius                              | 100.00      | Bacillota      | Streptococcus       | Streptococcus salivarius         | 4   |
| T2101078481 | ODP-AM09-2D6      | Enterococcus_faecalis                                 | 100.00      | Bacillota      | Enterococcus        | Enterococcus faecalis            | 21  |
| T2101078490 | ODP-AM09-2D16     | Streptococcus_salivarius                              | 99.86       | Bacillota      | Streptococcus       | Streptococcus salivarius         | 4   |
| T2101078492 | ODP-AM09-2D18     | Veillonella_dispar                                    | 90.32       | Bacillota      | Veillonella         | Veillonella atypica              | 178 |
| T2101078494 | ODP-AM09-2D20     | Streptococcus_salivarius                              | 99.86       | Bacillota      | Streptococcus       | Streptococcus salivarius         | 4   |
| T2101078495 | ODP-AM09-2D21     | Veillonella_atypica                                   | 92.59       | Bacillota      | Veillonella         | Veillonella atypica              | 178 |
| T2101078500 | ODP-AF08-11-O-MRS | Streptococcus_anginosus                               | 99.72       | Bacillota      | Streptococcus       | Streptococcus anginosus          | 61  |
| T2101078504 | ODP-AF08-18-O-MRS | Streptococcus_salivarius                              | 100.00      | Bacillota      | Streptococcus       | Streptococcus salivarius         | 4   |
| T2101078508 | ODP-AF08-25-O-MRS | Streptococcus_anginosus                               | 99.72       | Bacillota      | Streptococcus       | Streptococcus anginosus          | 61  |
| T2101078509 | ODP-AF08-26-O-MRS | Streptococcus_sanguinis                               | 99.91       | Bacillota      | Streptococcus       | Streptococcus sanguinis_H        | 3   |
| T2101078510 | ODP-AF08-27-O-MRS | Streptococcus_anginosus                               | 99.72       | Bacillota      | Streptococcus       | Streptococcus anginosus          | 61  |
| T2101078518 | ORT-AF08-12-O-MRS | Streptococcus_salivarius                              | 100.00      | Bacillota      | Streptococcus       | Streptococcus salivarius         | 4   |
| T2101078520 | ORT-AF08-14-O-MRS | Streptococcus_anginosus                               | 99.72       | Bacillota      | Streptococcus       | Streptococcus anginosus_C        | 104 |
| T2101078525 | ORT-AF08-20-O-MRS | Streptococcus_sanguinis                               | 99.93       | Bacillota      | Streptococcus       | Streptococcus sanguinis_H        | 3   |
| T2101078526 | ORT-AF08-21-O-MRS | Streptococcus_mitis                                   | 99.65       | Bacillota      | Streptococcus       | Streptococcus oralis             | 107 |
| T2101081681 | ORS-AM09-1-104    | Streptococcus_pseudopneumoniae                        | 99.79       | Bacillota      | Streptococcus       | 0                                | 158 |
| T2101081682 | ORS-AM09-2-104    | Lachnoanaerobaculum_umeaense                          | 93.46       | Bacillota      | Lachnoanaerobaculum | Lachnoanaerobaculum sp000296385  | 165 |
| T2101081683 | ORS-AM09-3-104    | Gemella_haemolysans                                   | 99.72       | Bacillota      | Gemella             | 0                                | 181 |
| T2101081684 | ORS-AM09-4-104    | Streptococcus_oralis                                  | 99.25       | Bacillota      | Streptococcus       | Streptococcus sp013394695        | 120 |
| T2101081685 | ORS-AM09-5-104    | Streptococcus_mitis                                   | 99.11       | Bacillota      | Streptococcus       | Streptococcus mitis_O            | 182 |
| T2101081686 | ORS-AM09-6-104    | Streptococcus_parasanguinis                           | 99.80       | Bacillota      | Streptococcus       | Streptococcus sp900766505        | 6   |
| T2101081688 | ORS-AM09-8-104    | Streptococcus_oralis                                  | 98.24       | Bacillota      | Streptococcus       | 0                                | 160 |
| T2101081689 | ORS-AM09-9-104    | Streptococcus_pseudopneumoniae                        | 99.79       | Bacillota      | Streptococcus       | Streptococcus symci              | 157 |
| T2101081690 | ORS-AM09-10-104   | Streptococcus_mitis                                   | 99.31       | Bacillota      | Streptococcus       | Streptococcus pseudopneumoniae_M | 115 |
| T2101081692 | ORS-AM09-12-104   | Streptococcus_salivarius                              | 99.79       | Bacillota      | Streptococcus       | Streptococcus salivarius         | 4   |
| T2101081693 | ORS-AM09-13-104   | Streptococcus_parasanguinis                           | 99.11       | Bacillota      | Streptococcus       | Streptococcus sp001813295        | 6   |
| T2101081695 | ORS-AM09-15-104   | Streptococcus_parasanguinis                           | 92.36       | Bacillota      | Streptococcus       | Streptococcus sp001813295        | 183 |
| T2101081696 | ORS-AM09-16-104   | Streptococcus_mitis                                   | 99.59       | Bacillota      | Streptococcus       | Streptococcus oralis_BA          | 163 |
| T2101081698 | ORS-AM09-18-104   | Streptococcus_oralis                                  | 98.91       | Bacillota      | Streptococcus       | Streptococcus infantis_B         | 159 |
| T2101081699 | ORS-AM09-19-104   | Streptococcus_pseudopneumoniae                        | 99.79       | Bacillota      | Streptococcus       | Streptococcus symci              | 157 |
| T2101081702 | ORS-AM09-22-104   | Streptococcus_pseudopneumoniae                        | 99.79       | Bacillota      | Streptococcus       | Streptococcus mitis_AC           | 85  |
| T2101081708 | ODP-AM09-3-104    | Streptococcus_pseudopneumoniae                        | 99.79       | Bacillota      | Streptococcus       | Streptococcus symci              | 157 |
| T2101081710 | ODP-AM09-5-104    | Streptococcus_mitis                                   | 99.59       | Bacillota      | Streptococcus       | Streptococcus oralis_BA          | 163 |
| T2101081711 | ODP-AM09-6-104    | Streptococcus_pseudopneumoniae                        | 99.59       | Bacillota      | Streptococcus       | 0                                | 158 |
| T2101081713 | ODP-AM09-8-104    | Streptococcus_parasanguinis                           | 98.91       | Bacillota      | Streptococcus       | Streptococcus parasanguinis_E    | 6   |
| T2101081714 | ODP-AM09-9-104    | Streptococcus_pseudopneumoniae                        | 99.59       | Bacillota      | Streptococcus       | 0                                | 158 |
| T2101081715 | ODP-AM09-10-104   | Streptococcus_mitis                                   | 100.00      | Bacillota      | Streptococcus       | Streptococcus symci              | 157 |

|             |                  |                                                  |             |                |                |                               |     |
|-------------|------------------|--------------------------------------------------|-------------|----------------|----------------|-------------------------------|-----|
| T2101081716 | ODP-AM09-11-104  | Streptococcus_anginosus                          | 98.44       | Bacillota      | Streptococcus  | Streptococcus anginosus_C     | 104 |
| T2101081717 | ODP-AM09-12-104  | Streptococcus_pseudopneumoniae                   | 99.65       | Bacillota      | Streptococcus  | 0                             | 158 |
| T2101081718 | ODP-AM09-13-104  | Streptococcus_pseudopneumoniae                   | 99.59       | Bacillota      | Streptococcus  | 0                             | 158 |
| T2101081719 | ODP-AM09-14-104  | Streptococcus_oralis                             | 99.32       | Bacillota      | Streptococcus  | 0                             | 184 |
| T2101081720 | ODP-AM09-15-104  | Streptococcus_pseudopneumoniae                   | 99.79       | Bacillota      | Streptococcus  | Streptococcus symci           | 157 |
| T2101081722 | ODP-AM09-17-104  | Streptococcus_mitis                              | 99.65       | Bacillota      | Streptococcus  | Streptococcus oralis          | 107 |
| T2101081723 | ODP-AM09-18-104  | Streptococcus_gordonii                           | 99.66       | Bacillota      | Streptococcus  | Streptococcus gordonii        | 63  |
| T2101081725 | ODP-AM09-20-104  | Streptococcus_pseudopneumoniae                   | 99.79       | Bacillota      | Streptococcus  | 0                             | 158 |
| T2101081726 | ODP-AM09-21-104  | Streptococcus_pseudopneumoniae                   | 99.65       | Bacillota      | Streptococcus  | 0                             | 158 |
| T2101081727 | ODP-AM09-22-104  | Streptococcus_gordonii                           | 99.66       | Bacillota      | Streptococcus  | Streptococcus gordonii        | 63  |
| T2101081728 | ODP-AM09-23-104  | Streptococcus_mitis                              | 99.59       | Bacillota      | Streptococcus  | Streptococcus oralis_BA       | 163 |
| T2101081729 | ODP-AM09-24-104  | Streptococcus_parasanguinis                      | 99.11       | Bacillota      | Streptococcus  | Streptococcus sp001813295     | 6   |
| T2101081731 | ODP-AM09-26-104  | Streptococcus_mitis                              | 99.65       | Bacillota      | Streptococcus  | Streptococcus oralis          | 107 |
| T2101081732 | ODP-AM09-27-104  | Streptococcus_mitis                              | 99.59       | Bacillota      | Streptococcus  | Streptococcus oralis_BA       | 163 |
| T2101081734 | ORT-AM09-3-104   | Streptococcus_oralis                             | 99.25       | Bacillota      | Streptococcus  | Streptococcus sp013394695     | 120 |
| T2101081735 | ORT-AM09-5-104   | Streptococcus_parasanguinis                      | 98.84       | Bacillota      | Streptococcus  | Streptococcus sp900766505     | 6   |
| T2101081736 | ORT-AM09-6-104   | Streptococcus_parasanguinis                      | 99.04       | Bacillota      | Streptococcus  | Streptococcus sp001813295     | 6   |
| T2101081738 | ORT-AM09-8-104   | Streptococcus_oralis                             | 98.44       | Bacillota      | Streptococcus  | Streptococcus sp013394695     | 120 |
| T2101081739 | ORT-AM09-9-104   | Streptococcus_parasanguinis                      | 98.50       | Bacillota      | Streptococcus  | Streptococcus parasanguinis_C | 53  |
| T2101081740 | ORT-AM09-10-104  | Streptococcus_oralis                             | 99.07       | Bacillota      | Streptococcus  | Streptococcus infantis_B      | 159 |
| T2101081744 | ORT-AM09-14-104  | Lactococcus_lactis<br>/Actinomyces_odontolyticus | 89.97/98.94 | Actinomycetota | Pauljensenia   | Pauljensenia sp000411415      | 166 |
| T2101081746 | ORT-AM09-17-104  | Streptococcus_parasanguinis                      | 99.79       | Bacillota      | Streptococcus  | Streptococcus parasanguinis   | 20  |
| T2101081747 | ORT-AM09-19-104  | Streptococcus_parasanguinis                      | 98.44       | Bacillota      | Streptococcus  | Streptococcus sp900766505     | 6   |
| T2101081750 | ORT-AM09-23-104  | Streptococcus_oralis                             | 98.57       | Bacillota      | Streptococcus  | Streptococcus infantis_B      | 159 |
| T2102085941 | ORS-AF08-20      | Streptococcus_pseudopneumoniae                   | 99.04       | Bacillota      | Streptococcus  | 0                             | 170 |
| T2102085942 | ORS-AF08-21      | Streptococcus_mitis                              | 99.65       | Bacillota      | Streptococcus  | Streptococcus oralis          | 107 |
| T2102085943 | ORS-AF08-22      | Streptococcus_mitis                              | 99.65       | Bacillota      | Streptococcus  | Streptococcus oralis          | 107 |
| T2102085944 | ORS-AF08-23      | Streptococcus_timonensis                         | 96.86       | Bacillota      | Streptococcus  | 0                             | 176 |
| T2102085945 | ORS-AF08-24      | Streptococcus_mitis                              | 99.64       | Bacillota      | Streptococcus  | Streptococcus oralis          | 107 |
| T2102085947 | ORT-AF08-2       | Streptococcus_anginosus                          | 99.66       | Bacillota      | Streptococcus  | Streptococcus anginosus       | 61  |
| T2102085948 | ORT-AF08-3       | #N/A                                             | #N/A        | Bacillota      | Streptococcus  | Streptococcus constellatus    | 46  |
| T2102085949 | ORT-AF08-4       | Streptococcus_oralis                             | 99.77       | Bacillota      | Streptococcus  | Streptococcus oralis_AC       | 173 |
| T2102085950 | ORT-AF08-5       | Streptococcus_timonensis                         | 99.72       | Bacillota      | Streptococcus  | 0                             | 176 |
| T2102085951 | ORT-AF08-6       | #N/A                                             | #N/A        | Bacillota      | Streptococcus  | Streptococcus salivarius      | 4   |
| T2102085952 | ORT-AF08-7       | Streptococcus_mitis                              | 99.11       | Bacillota      | Streptococcus  | 0                             | 171 |
| T2102085953 | ORT-AF08-8       | Streptococcus_salivarius                         | 71.23       | Bacillota      | Streptococcus  | Streptococcus salivarius      | 4   |
| T2102085954 | ORT-AF08-9       | Streptococcus_salivarius                         | 99.72       | Bacillota      | Streptococcus  | Streptococcus salivarius      | 4   |
| T2102085955 | ORT-AF08-10      | Streptococcus_infantis                           | 99.45       | Bacillota      | Streptococcus  | 0                             | 185 |
| T2102085956 | ORT-AF08-11      | Streptococcus_mitis                              | 99.32       | Bacillota      | Streptococcus  | Streptococcus oralis          | 107 |
| T2102085957 | ORT-AF08-12      | Streptococcus_salivarius                         | 99.86       | Bacillota      | Streptococcus  | Streptococcus salivarius      | 4   |
| T2102085958 | ORT-AF08-13      | Streptococcus_mitis                              | 99.65       | Bacillota      | Streptococcus  | Streptococcus oralis          | 107 |
| T2102085960 | ORT-AF08-15      | Streptococcus_salivarius                         | 99.86       | Bacillota      | Streptococcus  | Streptococcus salivarius      | 4   |
| T2102085961 | ORT-AF08-16      | Streptococcus_mitis                              | 99.04       | Bacillota      | Streptococcus  | Streptococcus oralis_K        | 79  |
| T2102085962 | ORT-AF08-17      | Streptococcus_infantis                           | 99.45       | Bacillota      | Streptococcus  | 0                             | 185 |
| T2102085963 | ORT-AF08-18      | Streptococcus_australis                          | 94.69       | Bacillota      | Streptococcus  | 0                             | 68  |
| T2102085964 | ORT-AF08-19      | Streptococcus_anginosus                          | 83.05       | Bacillota      | Streptococcus  | Streptococcus anginosus_C     | 104 |
| T2102085965 | ODP-AF08-2       | Streptococcus_mitis                              | 99.81       | Bacillota      | Streptococcus  | Streptococcus oralis          | 107 |
| T2102085966 | ODP-AF08-3       | Streptococcus_constellatus                       | 99.86       | Bacillota      | Streptococcus  | Streptococcus constellatus    | 46  |
| T2102085968 | ORS-AM09-5D1B    | Veillonella_parvula                              | 99.32       | Bacillota      | Veillonella    | Veillonella parvula_A         | 92  |
| T2102085969 | ORS-AM09-5D2A    | Veillonella_tobetsuensis                         | 99.61       | Bacillota      | Veillonella    | Veillonella parvula_A         | 92  |
| T2102085974 | ODP-AM09-2D3B    | Veillonella_atypica                              | 99.52       | Bacillota      | Veillonella    | Veillonella atypica           | 178 |
| T2102085975 | ORS-AF08-13B     | Granulicatella_adiacens                          | 99.72       | Bacillota      | Granulicatella | 0                             | 106 |
| T2102085978 | ORT-AF08-8-MRS   | Rothia_mucilaginoso                              | 99.58       | Actinomycetota | Rothia         | Rothia mucilaginoso_B         | 59  |
| T2102085980 | ODP-AF08-20      | Enterococcus_faecalis<br>/Actinomyces_oris       | 99.93/96.8  | Bacillota      | Enterococcus   | Enterococcus faecalis         | 21  |
| T2103096290 | ORS-AF10-1-O-BH  | Actinomyces_naeslundii                           | 99.36       | Actinomycetota | Actinomyces    | Actinomyces oris              | 39  |
| T2103096291 | ORS-AF10-5-O-BH  | Actinomyces_naeslundii                           | 98.04       | Actinomycetota | Actinomyces    | Actinomyces oris              | 39  |
| T2103096292 | ORS-AF10-6-O-BH  | Neisseria_cinerea                                | 97.88       | Pseudomonadota | Neisseria      | Neisseria flavescens_B        | 15  |
| T2103096301 | ORS-AF10-17-O-BH | Neisseria_cinerea                                | 97.88       | Pseudomonadota | Neisseria      | Neisseria flavescens_B        | 15  |
| T2103096302 | ORS-AF10-18-O-BH | Rothia_dentocariosa                              | 100.00      | Actinomycetota | Rothia         | Rothia dentocariosa           | 13  |
| T2103096304 | ORS-AF10-20-O-BH | Streptococcus_oralis                             | 99.66       | Bacillota      | Streptococcus  | Streptococcus sp900550895     | 186 |
| T2103096306 | ORS-AF10-23-O-BH | Actinomyces_naeslundii                           | 99.29       | Actinomycetota | Actinomyces    | Actinomyces oris              | 39  |
| T2103096307 | ORS-AF10-24-O-BH | Neisseria_cinerea                                | 97.88       | Pseudomonadota | Neisseria      | Neisseria flavescens_B        | 15  |
| T2103096310 | ORS-AF10-28-O-BH | Actinomyces_naeslundii<br>/Gemella_haemolysans   | 97.37/99.93 | Actinomycetota | Actinomyces    | Actinomyces oris              | 39  |
| T2103096316 | ODP-AF10-3-O-BH  | Actinomyces_naeslundii                           | 97.97       | Actinomycetota | Actinomyces    | Actinomyces oris              | 39  |
| T2103096318 | ODP-AF10-6-O-BH  | Rothia_dentocariosa                              | 99.51       | Actinomycetota | Rothia         | Rothia dentocariosa           | 13  |
| T2103096320 | ODP-AF10-9-O-BH  | Rothia_dentocariosa                              | 99.93       | Actinomycetota | Rothia         | Rothia dentocariosa           | 13  |
| T2103096321 | ODP-AF10-10-O-BH | Rothia_dentocariosa                              | 99.93       | Actinomycetota | Rothia         | Rothia dentocariosa           | 13  |
| T2103096323 | ODP-AF10-12-O-BH | Actinomyces_naeslundii                           | 99.36       | Actinomycetota | Actinomyces    | Actinomyces oris              | 39  |
| T2103096327 | ODP-AF10-17-O-BH | Neisseria_macacae                                | 100.00      | Pseudomonadota | Neisseria      | Neisseria sicca_B             | 187 |
| T2103096348 | ORT-AF10-10-O-BH | Streptococcus_salivarius                         | 98.70       | Bacillota      | Streptococcus  | Streptococcus salivarius      | 4   |
| T2103096349 | ORT-AF10-11-O-BH | Neisseria_cinerea                                | 97.88       | Pseudomonadota | Neisseria      | Neisseria flavescens_B        | 15  |
| T2103096352 | ORT-AF10-14-O-BH | Streptococcus_oralis                             | 99.11       | Bacillota      | Streptococcus  | Streptococcus oralis_T        | 35  |
| T2103096353 | ORT-AF10-15-O-BH | Streptococcus_oralis                             | 98.57       | Bacillota      | Streptococcus  | Streptococcus infantis_B      | 159 |
| T2103096354 | ORT-AF10-16-O-BH | Rothia_dentocariosa                              | 99.93       | Actinomycetota | Rothia         | Rothia dentocariosa           | 13  |
| T2103096355 | ORT-AF10-18-O-BH | Rothia_dentocariosa                              | 99.93       | Actinomycetota | Rothia         | Rothia dentocariosa           | 13  |
| T2103096356 | ORT-AF10-19-O-BH | Actinomyces_naeslundii                           | 97.37       | Actinomycetota | Actinomyces    | Actinomyces oris              | 39  |
| T2103096357 | ORT-AF10-20-O-BH | Streptococcus_gordonii                           | 99.66       | Bacillota      | Streptococcus  | Streptococcus gordonii        | 63  |
| T2103096358 | ORT-AF10-21-O-BH | Rothia_aeria                                     | 99.86       | Actinomycetota | Rothia         | Rothia aeria                  | 32  |
| T2103096359 | ORT-AF10-22-O-BH | Rothia_dentocariosa                              | 100.00      | Actinomycetota | Rothia         | Rothia dentocariosa           | 13  |
| T2103096360 | ORT-AF10-23-O-BH | Streptococcus_rubneri                            | 96.45       | Bacillota      | Streptococcus  | Streptococcus sp902363395     | 98  |
| T2103096362 | ORT-AF10-25-O-BH | Neisseria_cinerea                                | 97.88       | Pseudomonadota | Neisseria      | Neisseria flavescens_B        | 15  |
| T2103096363 | ORT-AF10-26-O-BH | Streptococcus_salivarius                         | 99.86       | Bacillota      | Streptococcus  | Streptococcus salivarius      | 4   |
| T2103096366 | ODP-AF10-C3      | Abiotrophia_defectiva                            | 99.59       | Bacillota      | Abiotrophia    | Abiotrophia defectiva         | 37  |
| T2103096369 | ODP-AF10-C6      | Streptococcus_constellatus                       | 99.12       | Bacillota      | Streptococcus  | Streptococcus constellatus    | 46  |
| T2103096370 | ODP-AF10-C7      | Capnocytophaga_ochracea                          | 98.11       | Bacteroidota   | Capnocytophaga | Capnocytophaga ochracea       | 190 |

|             |                  |                                |        |                |                |                               |     |
|-------------|------------------|--------------------------------|--------|----------------|----------------|-------------------------------|-----|
| T2103096374 | ODP-AF10-C11     | Capnocytophaga_ochracea        | 97.77  | Bacteroidota   | Capnocytophaga | Capnocytophaga ochracea       | 190 |
| T2103096376 | ODP-AF10-C13     | Capnocytophaga_ochracea        | 98.34  | Bacteroidota   | Capnocytophaga | Capnocytophaga ochracea       | 190 |
| T2103096378 | ODP-AF10-C16     | Fusobacterium_nucleatum        | 99.85  | Fusobacteriota | Fusobacterium  | Fusobacterium polymorphum     | 87  |
| T2103096379 | ODP-AF10-C17     | Actinomyces_naeslundii         | 98.78  | Actinomycetota | Actinomyces    | Actinomyces naeslundii        | 33  |
| T2103096381 | ODP-AF10-C20     | Actinomyces_odontolyticus      | 99.19  | Actinomycetota | Pauljensenia   | Pauljensenia odontolytica_A   | 27  |
| T2103096382 | ODP-AF10-C21     | Streptococcus_mitis            | 99.65  | Bacillota      | Streptococcus  | Streptococcus sp900555155     | 107 |
| T2103096383 | ODP-AF10-C22     | Actinomyces_naeslundii         | 99.29  | Actinomycetota | Actinomyces    | Actinomyces oris              | 39  |
| T2103096384 | ODP-AF10-C23     | Streptococcus_pseudopneumoniae | 99.59  | Bacillota      | Streptococcus  | Streptococcus mitis_BB        | 188 |
| T2103096385 | ORT-AF10-C1      | Streptococcus_pseudopneumoniae | 99.72  | Bacillota      | Streptococcus  | Streptococcus symci           | 157 |
| T2103096389 | ORT-AF10-C6      | #N/A                           | #N/A   | Bacillota      | Bacillus_A     | Bacillus_A tropicus           | 191 |
| T2103096391 | ORT-AF10-C8      | Actinomyces_naeslundii         | 98.32  | Actinomycetota | Actinomyces    | Actinomyces naeslundii        | 33  |
| T2103096393 | ORT-AF10-C11     | Streptococcus_oralis           | 99.66  | Bacillota      | Streptococcus  | Streptococcus sp900550895     | 186 |
| T2103096394 | ORT-AF10-C12     | Streptococcus_oralis           | 99.66  | Bacillota      | Streptococcus  | Streptococcus sp900550895     | 186 |
| T2103096395 | ORT-AF10-C13     | Streptococcus_rubneri          | 97.04  | Bacillota      | Streptococcus  | 0                             | 68  |
| T2103096397 | ORT-AF10-C15     | #N/A                           | #N/A   | Bacillota      | Bacillus_A     | Bacillus_A tropicus           | 191 |
| T2103096401 | ORS-AF10-C5      | Actinomyces_naeslundii         | 88.56  | Actinomycetota | Actinomyces    | Actinomyces oris              | 39  |
| T2103096403 | ORS-AF10-C8      | Streptococcus_pseudopneumoniae | 99.52  | Bacillota      | Streptococcus  | Streptococcus mitis_BB        | 188 |
| T2103096404 | ORS-AF10-C9      | Actinomyces_naeslundii         | 98.31  | Actinomycetota | Actinomyces    | Actinomyces oris              | 39  |
| T2103096405 | ORS-AF10-C11     | #N/A                           | #N/A   | Bacteroidota   | Capnocytophaga | Capnocytophaga ochracea       | 190 |
| T2103096406 | ORS-AF10-C12     | Streptococcus_oralis           | 99.38  | Bacillota      | Streptococcus  | 0                             | 192 |
| T2103096407 | ORS-AF10-C13     | Streptococcus_oralis           | 99.38  | Bacillota      | Streptococcus  | 0                             | 192 |
| T2103096409 | ORS-AF10-C15     | Streptococcus_infantis         | 99.25  | Bacillota      | Streptococcus  | 0                             | 193 |
| T2103096412 | ORS-AF10-C18     | Streptococcus_parasanguinis    | 98.84  | Bacillota      | Streptococcus  | Streptococcus sp900766505     | 6   |
| T2103096413 | ORS-AF10-C19     | Streptococcus_mitis            | 99.59  | Bacillota      | Streptococcus  | 0                             | 194 |
| T2103096414 | ORS-AF10-C20     | Streptococcus_mitis            | 99.65  | Bacillota      | Streptococcus  | 0                             | 194 |
| T2103096415 | ORS-AF10-1-BH    | Streptococcus_parasanguinis    | 99.04  | Bacillota      | Streptococcus  | Streptococcus parasanguinis_C | 53  |
| T2103096416 | ORS-AF10-2-BH    | Streptococcus_parasanguinis    | 98.97  | Bacillota      | Streptococcus  | Streptococcus parasanguinis_C | 53  |
| T2103096417 | ORS-AF10-3-BH    | Streptococcus_oralis           | 99.11  | Bacillota      | Streptococcus  | Streptococcus sp013394695     | 184 |
| T2103096419 | ORS-AF10-5-BH    | Streptococcus_pseudopneumoniae | 99.72  | Bacillota      | Streptococcus  | Streptococcus symci           | 157 |
| T2103096421 | ORS-AF10-7-BH    | Streptococcus_mitis            | 99.65  | Bacillota      | Streptococcus  | Streptococcus oralis          | 107 |
| T2103096422 | ORS-AF10-8-BH    | Streptococcus_pseudopneumoniae | 99.72  | Bacillota      | Streptococcus  | Streptococcus symci           | 157 |
| T2103096423 | ORS-AF10-9-BH    | Streptococcus_mitis            | 99.31  | Bacillota      | Streptococcus  | Streptococcus mitis_AC        | 170 |
| T2103096424 | ORS-AF10-10-BH   | Streptococcus_mitis            | 99.65  | Bacillota      | Streptococcus  | 0                             | 194 |
| T2103096425 | ORS-AF10-11-BH   | Streptococcus_mitis            | 99.65  | Bacillota      | Streptococcus  | 0                             | 194 |
| T2103096426 | ORS-AF10-12-BH   | Granulicatella_adiacens        | 99.32  | Bacillota      | Granulicatella | Granulicatella sp001058355    | 95  |
| T2103096427 | ORS-AF10-13-BH   | Streptococcus_pseudopneumoniae | 99.72  | Bacillota      | Streptococcus  | Streptococcus symci           | 157 |
| T2103096428 | ORS-AF10-14-BH   | Granulicatella_adiacens        | 99.32  | Bacillota      | Granulicatella | Granulicatella sp001058355    | 95  |
| T2103096436 | ORS-AF10-22-BH   | Streptococcus_oralis           | 99.66  | Bacillota      | Streptococcus  | Streptococcus sp900550895     | 186 |
| T2103096438 | ORS-AF10-24-BH   | Granulicatella_adiacens        | 99.72  | Bacillota      | Granulicatella | Granulicatella sp001071995    | 195 |
| T2103096330 | ODP-AF10-20-O-BH | Rothia_aeria                   | 99.86  | Actinomycetota | Rothia         | Rothia aeria                  | 32  |
| T2103096333 | ODP-AF10-25-O-BH | Neisseria_macacae              | 100.00 | Pseudomonadota | Neisseria      | Neisseria sicca_B             | 187 |
| T2103096329 | ODP-AF10-19-O-BH | Actinomyces_oris               | 99.34  | Actinomycetota | Actinomyces    | Actinomyces oris              | 39  |
| T2103096337 | ODP-AF10-31-O-BH | Enterococcus_faecalis          | 100.00 | Bacillota      | Enterococcus   | Enterococcus faecalis         | 21  |
| T2103096336 | ODP-AF10-30-O-BH | Actinomyces_naeslundii         | 97.37  | Actinomycetota | Actinomyces    | Actinomyces oris              | 39  |
| T2103096328 | ODP-AF10-18-O-BH | Neisseria_cinerea              | 97.88  | Pseudomonadota | Neisseria      | Neisseria flavescens_B        | 15  |
| T2103096346 | ORT-AF10-07-O-BH | Streptococcus_mitis            | 99.65  | Bacillota      | Streptococcus  | 0                             | 189 |
| T2103096339 | ODP-AF10-33-O-BH | Actinomyces_naeslundii         | 99.59  | Actinomycetota | Actinomyces    | Actinomyces naeslundii        | 33  |
| T2103096344 | ORT-AF10-05-O-BH | Streptococcus_pseudopneumoniae | 99.52  | Bacillota      | Streptococcus  | Streptococcus mitis_BB        | 188 |
| T2103096332 | ODP-AF10-23-O-BH | Rothia_dentocariosa            | 99.93  | Actinomycetota | Rothia         | Rothia dentocariosa           | 13  |
| T2103096331 | ODP-AF10-21-O-BH | Rothia_dentocariosa            | 100.00 | Actinomycetota | Rothia         | Rothia dentocariosa           | 13  |
| T2103096347 | ORT-AF10-08-O-BH | Streptococcus_parasanguinis    | 99.76  | Bacillota      | Streptococcus  | Streptococcus parasanguinis   | 20  |
| T2102085873 | ORS-AF08-6       | Streptococcus_salivarius       | 99.86  | Bacillota      | Streptococcus  | Streptococcus salivarius      | 4   |
| T2102085868 | ORS-AF08-1       | Streptococcus_timonensis       | 97.75  | Bacillota      | Streptococcus  | 0                             | 176 |
| T2102085869 | ORS-AF08-2       | Streptococcus_salivarius       | 99.86  | Bacillota      | Streptococcus  | Streptococcus salivarius      | 4   |
| T2102085875 | ORS-AF08-8       | Streptococcus_oralis           | 99.18  | Bacillota      | Streptococcus  | 0                             | 154 |
| T2102085876 | ORS-AF08-9       | Streptococcus_salivarius       | 99.86  | Bacillota      | Streptococcus  | Streptococcus salivarius      | 4   |
| T2102085872 | ORS-AF08-5       | Streptococcus_rubneri          | 91.91  | Bacillota      | Streptococcus  | Streptococcus koreensis       | 68  |
| T2102085931 | ORS-AF08-10      | Streptococcus_mitis            | 99.65  | Bacillota      | Streptococcus  | Streptococcus sp900555155     | 107 |
| T2102085870 | ORS-AF08-3       | Streptococcus_infantis         | 99.52  | Bacillota      | Streptococcus  | 0                             | 154 |
| T2102085936 | ORS-AF08-15      | Streptococcus_salivarius       | 100.00 | Bacillota      | Streptococcus  | Streptococcus salivarius      | 4   |
| T2102085937 | ORS-AF08-16      | Streptococcus_sanguinis        | 100.00 | Bacillota      | Streptococcus  | Streptococcus sanguinis_H     | 3   |
| T2102085935 | ORS-AF08-14      | Streptococcus_mitis            | 99.65  | Bacillota      | Streptococcus  | Streptococcus oralis          | 107 |
| T2102085940 | ORS-AF08-19      | Streptococcus_mitis            | 99.52  | Bacillota      | Streptococcus  | Streptococcus oralis          | 107 |
| T2102085938 | ORS-AF08-17      | Streptococcus_mitis            | 99.52  | Bacillota      | Streptococcus  | Streptococcus oralis          | 107 |
| T2102085932 | ORS-AF08-11      | Streptococcus_timonensis       | 99.04  | Bacillota      | Streptococcus  | 0                             | 127 |
| T2102085939 | ORS-AF08-18      | Streptococcus_constellatus     | 99.05  | Bacillota      | Streptococcus  | Streptococcus constellatus    | 46  |
| T2102085934 | ORS-AF08-13      | Streptococcus_mitis            | 86.48  | Bacillota      | Streptococcus  | Streptococcus oralis          | 107 |

**Supplementary Table 3. The functional annotation of the COGR genomes (BGC with known function)**

| Genome            | Cluster | Reference BGC                                                                                                               | Product          | Identity (%) |
|-------------------|---------|-----------------------------------------------------------------------------------------------------------------------------|------------------|--------------|
| ORS-AF05-12       | 4       | <a href="https://mibig.secondarymetabolites.org/go/BGC0001209/1">https://mibig.secondarymetabolites.org/go/BGC0001209/1</a> | streptide        | 1            |
| ORT-AM08-194      | 4       | <a href="https://mibig.secondarymetabolites.org/go/BGC0001929/1">https://mibig.secondarymetabolites.org/go/BGC0001929/1</a> | WGK              | 0.8          |
| ORS-AF04-41       | 3       | <a href="https://mibig.secondarymetabolites.org/go/BGC0000556/1">https://mibig.secondarymetabolites.org/go/BGC0000556/1</a> | streptin         | 0.9          |
| ORS-AF05-14       | 4       | <a href="https://mibig.secondarymetabolites.org/go/BGC0001209/1">https://mibig.secondarymetabolites.org/go/BGC0001209/1</a> | streptide        | 1            |
| ORS-AF05-16       | 4       | <a href="https://mibig.secondarymetabolites.org/go/BGC0001209/1">https://mibig.secondarymetabolites.org/go/BGC0001209/1</a> | streptide        | 1            |
| ORS-AF06-69       | 61      | <a href="https://mibig.secondarymetabolites.org/go/BGC0000566/1">https://mibig.secondarymetabolites.org/go/BGC0000566/1</a> | streptolysin S   | 0.77         |
| ORT-AM08-200      | 4       | <a href="https://mibig.secondarymetabolites.org/go/BGC0001929/1">https://mibig.secondarymetabolites.org/go/BGC0001929/1</a> | WGK              | 1            |
| ORS-AM04-86       | 3       | <a href="https://mibig.secondarymetabolites.org/go/BGC0000556/1">https://mibig.secondarymetabolites.org/go/BGC0000556/1</a> | streptin         | 0.9          |
| ORS-AM05-342      | 99      | <a href="https://mibig.secondarymetabolites.org/go/BGC0000944/1">https://mibig.secondarymetabolites.org/go/BGC0000944/1</a> | staphyloferrin A | 0.75         |
| ORS-AM08-15       | 4       | <a href="https://mibig.secondarymetabolites.org/go/BGC0001929/1">https://mibig.secondarymetabolites.org/go/BGC0001929/1</a> | WGK              | 0.8          |
| ODP-AF05-77       | 4       | <a href="https://mibig.secondarymetabolites.org/go/BGC0001209/1">https://mibig.secondarymetabolites.org/go/BGC0001209/1</a> | streptide        | 1            |
| ORT-AF03-21       | 4       | <a href="https://mibig.secondarymetabolites.org/go/BGC0001788/1">https://mibig.secondarymetabolites.org/go/BGC0001788/1</a> | suicin 65        | 1            |
| ORT-AF03-21       | 4       | <a href="https://mibig.secondarymetabolites.org/go/BGC0001209/1">https://mibig.secondarymetabolites.org/go/BGC0001209/1</a> | streptide        | 1            |
| ORT-AM08-202      | 4       | <a href="https://mibig.secondarymetabolites.org/go/BGC0001929/1">https://mibig.secondarymetabolites.org/go/BGC0001929/1</a> | WGK              | 0.8          |
| ODP-AF04-91       | 4       | <a href="https://mibig.secondarymetabolites.org/go/BGC0001209/1">https://mibig.secondarymetabolites.org/go/BGC0001209/1</a> | streptide        | 1            |
| ORT-AF03-24       | 117     | <a href="https://mibig.secondarymetabolites.org/go/BGC0000548/1">https://mibig.secondarymetabolites.org/go/BGC0000548/1</a> | salivaricin A    | 0.87         |
| ORT-AF03-24       | 117     | <a href="https://mibig.secondarymetabolites.org/go/BGC0001788/1">https://mibig.secondarymetabolites.org/go/BGC0001788/1</a> | suicin 65        | 1            |
| ORT-AF04-19       | 4       | <a href="https://mibig.secondarymetabolites.org/go/BGC0000556/1">https://mibig.secondarymetabolites.org/go/BGC0000556/1</a> | streptin         | 0.9          |
| ORT-AF04-19       | 4       | <a href="https://mibig.secondarymetabolites.org/go/BGC0001788/1">https://mibig.secondarymetabolites.org/go/BGC0001788/1</a> | suicin 65        | 1            |
| ORS-AF04-236      | 3       | <a href="https://mibig.secondarymetabolites.org/go/BGC0000556/1">https://mibig.secondarymetabolites.org/go/BGC0000556/1</a> | streptin         | 0.9          |
| ORS-AM05-336      | 99      | <a href="https://mibig.secondarymetabolites.org/go/BGC0000944/1">https://mibig.secondarymetabolites.org/go/BGC0000944/1</a> | staphyloferrin A | 0.75         |
| ODP-AF04-99       | 4       | <a href="https://mibig.secondarymetabolites.org/go/BGC0001209/1">https://mibig.secondarymetabolites.org/go/BGC0001209/1</a> | streptide        | 1            |
| ORT-AM01-01TBO    | 137     | <a href="https://mibig.secondarymetabolites.org/go/BGC0000942/1">https://mibig.secondarymetabolites.org/go/BGC0000942/1</a> | petrobactin      | 1            |
| ORS-AF03-153      | 117     | <a href="https://mibig.secondarymetabolites.org/go/BGC0000548/1">https://mibig.secondarymetabolites.org/go/BGC0000548/1</a> | salivaricin A    | 0.87         |
| ORS-AF03-153      | 117     | <a href="https://mibig.secondarymetabolites.org/go/BGC0001788/1">https://mibig.secondarymetabolites.org/go/BGC0001788/1</a> | suicin 65        | 1            |
| ORS-AF03-155      | 141     | <a href="https://mibig.secondarymetabolites.org/go/BGC0001929/1">https://mibig.secondarymetabolites.org/go/BGC0001929/1</a> | WGK              | 0.8          |
| ODP-AF04-103      | 4       | <a href="https://mibig.secondarymetabolites.org/go/BGC0001209/1">https://mibig.secondarymetabolites.org/go/BGC0001209/1</a> | streptide        | 1            |
| ODP-AF04-166      | 3       | <a href="https://mibig.secondarymetabolites.org/go/BGC0000556/1">https://mibig.secondarymetabolites.org/go/BGC0000556/1</a> | streptin         | 0.9          |
| ORT-AF04-29       | 4       | <a href="https://mibig.secondarymetabolites.org/go/BGC0000556/1">https://mibig.secondarymetabolites.org/go/BGC0000556/1</a> | streptin         | 0.9          |
| ORT-AF04-29       | 4       | <a href="https://mibig.secondarymetabolites.org/go/BGC0001788/1">https://mibig.secondarymetabolites.org/go/BGC0001788/1</a> | suicin 65        | 0.9          |
| ORT-AF04-121      | 4       | <a href="https://mibig.secondarymetabolites.org/go/BGC0001209/1">https://mibig.secondarymetabolites.org/go/BGC0001209/1</a> | streptide        | 1            |
| ORT-AF04-228      | 4       | <a href="https://mibig.secondarymetabolites.org/go/BGC0000556/1">https://mibig.secondarymetabolites.org/go/BGC0000556/1</a> | streptin         | 0.9          |
| ORT-AF04-228      | 4       | <a href="https://mibig.secondarymetabolites.org/go/BGC0001788/1">https://mibig.secondarymetabolites.org/go/BGC0001788/1</a> | suicin 65        | 0.9          |
| ORS-AM09-33-O-BH  | 4       | <a href="https://mibig.secondarymetabolites.org/go/BGC0001788/1">https://mibig.secondarymetabolites.org/go/BGC0001788/1</a> | suicin 65        | 1            |
| ODP-AM09-19-O-BH  | 164     | <a href="https://mibig.secondarymetabolites.org/go/BGC0001356/1">https://mibig.secondarymetabolites.org/go/BGC0001356/1</a> | paeninodin       | 1            |
| ODP-AM09-19-O-BH  | 164     | <a href="https://mibig.secondarymetabolites.org/go/BGC0000942/1">https://mibig.secondarymetabolites.org/go/BGC0000942/1</a> | petrobactin      | 1            |
| ODP-AM09-29-O-BH  | 3       | <a href="https://mibig.secondarymetabolites.org/go/BGC0000556/1">https://mibig.secondarymetabolites.org/go/BGC0000556/1</a> | streptin         | 0.7          |
| ORS-AM09-20-BH    | 4       | <a href="https://mibig.secondarymetabolites.org/go/BGC0001788/1">https://mibig.secondarymetabolites.org/go/BGC0001788/1</a> | suicin 65        | 1            |
| ORS-AM09-20-BH    | 4       | <a href="https://mibig.secondarymetabolites.org/go/BGC0001209/1">https://mibig.secondarymetabolites.org/go/BGC0001209/1</a> | streptide        | 1            |
| ORS-AM09-30-BH    | 4       | <a href="https://mibig.secondarymetabolites.org/go/BGC0001788/1">https://mibig.secondarymetabolites.org/go/BGC0001788/1</a> | suicin 65        | 1            |
| ORS-AM09-30-BH    | 4       | <a href="https://mibig.secondarymetabolites.org/go/BGC0001209/1">https://mibig.secondarymetabolites.org/go/BGC0001209/1</a> | streptide        | 1            |
| ORS-AM09-8-O-104  | 4       | <a href="https://mibig.secondarymetabolites.org/go/BGC0001788/1">https://mibig.secondarymetabolites.org/go/BGC0001788/1</a> | suicin 65        | 1            |
| ORS-AM09-16-O-104 | 4       | <a href="https://mibig.secondarymetabolites.org/go/BGC0001788/1">https://mibig.secondarymetabolites.org/go/BGC0001788/1</a> | suicin 65        | 1            |
| ORS-AF08-2-MRS    | 4       | <a href="https://mibig.secondarymetabolites.org/go/BGC0001788/1">https://mibig.secondarymetabolites.org/go/BGC0001788/1</a> | suicin 65        | 1            |
| ORS-AF08-5-MRS    | 4       | <a href="https://mibig.secondarymetabolites.org/go/BGC0001788/1">https://mibig.secondarymetabolites.org/go/BGC0001788/1</a> | suicin 65        | 1            |
| ORS-AF08-23-MRS   | 4       | <a href="https://mibig.secondarymetabolites.org/go/BGC0001788/1">https://mibig.secondarymetabolites.org/go/BGC0001788/1</a> | suicin 65        | 1            |
| ORS-AF08-30-MRS   | 4       | <a href="https://mibig.secondarymetabolites.org/go/BGC0001788/1">https://mibig.secondarymetabolites.org/go/BGC0001788/1</a> | suicin 65        | 1            |
| ODP-AM09-2D1      | 4       | <a href="https://mibig.secondarymetabolites.org/go/BGC0001788/1">https://mibig.secondarymetabolites.org/go/BGC0001788/1</a> | suicin 65        | 1            |
| ODP-AM09-2D1      | 4       | <a href="https://mibig.secondarymetabolites.org/go/BGC0001209/1">https://mibig.secondarymetabolites.org/go/BGC0001209/1</a> | streptide        | 1            |
| ODP-AM09-2D2      | 4       | <a href="https://mibig.secondarymetabolites.org/go/BGC0001788/1">https://mibig.secondarymetabolites.org/go/BGC0001788/1</a> | suicin 65        | 1            |
| ODP-AM09-2D2      | 4       | <a href="https://mibig.secondarymetabolites.org/go/BGC0001209/1">https://mibig.secondarymetabolites.org/go/BGC0001209/1</a> | streptide        | 1            |
| ODP-AM09-2D4A     | 4       | <a href="https://mibig.secondarymetabolites.org/go/BGC0001788/1">https://mibig.secondarymetabolites.org/go/BGC0001788/1</a> | suicin 65        | 1            |
| ODP-AM09-2D4A     | 4       | <a href="https://mibig.secondarymetabolites.org/go/BGC0001209/1">https://mibig.secondarymetabolites.org/go/BGC0001209/1</a> | streptide        | 1            |
| ODP-AM09-2D4B     | 4       | <a href="https://mibig.secondarymetabolites.org/go/BGC0001209/1">https://mibig.secondarymetabolites.org/go/BGC0001209/1</a> | streptide        | 1            |
| ODP-AM09-2D4B     | 4       | <a href="https://mibig.secondarymetabolites.org/go/BGC0001788/1">https://mibig.secondarymetabolites.org/go/BGC0001788/1</a> | suicin 65        | 1            |
| ODP-AM09-2D5      | 4       | <a href="https://mibig.secondarymetabolites.org/go/BGC0001788/1">https://mibig.secondarymetabolites.org/go/BGC0001788/1</a> | suicin 65        | 1            |

|                   |     |                                                                                                                             |             |     |
|-------------------|-----|-----------------------------------------------------------------------------------------------------------------------------|-------------|-----|
| ODP-AM09-2D16     | 4   | <a href="https://mibig.secondarymetabolites.org/go/BGC0001788/1">https://mibig.secondarymetabolites.org/go/BGC0001788/1</a> | suicin 65   | 1   |
| ODP-AM09-2D16     | 4   | <a href="https://mibig.secondarymetabolites.org/go/BGC0001209/1">https://mibig.secondarymetabolites.org/go/BGC0001209/1</a> | streptide   | 1   |
| ODP-AM09-2D20     | 4   | <a href="https://mibig.secondarymetabolites.org/go/BGC0001788/1">https://mibig.secondarymetabolites.org/go/BGC0001788/1</a> | suicin 65   | 1   |
| ODP-AF08-18-O-MRS | 4   | <a href="https://mibig.secondarymetabolites.org/go/BGC0001788/1">https://mibig.secondarymetabolites.org/go/BGC0001788/1</a> | suicin 65   | 1   |
| ORT-AF08-12-O-MRS | 4   | <a href="https://mibig.secondarymetabolites.org/go/BGC0001788/1">https://mibig.secondarymetabolites.org/go/BGC0001788/1</a> | suicin 65   | 1   |
| ORS-AM09-12-104   | 4   | <a href="https://mibig.secondarymetabolites.org/go/BGC0001788/1">https://mibig.secondarymetabolites.org/go/BGC0001788/1</a> | suicin 65   | 1   |
| ORS-AM09-12-104   | 4   | <a href="https://mibig.secondarymetabolites.org/go/BGC0001929/1">https://mibig.secondarymetabolites.org/go/BGC0001929/1</a> | WGK         | 0.8 |
| ORT-AF10-10-O-BH  | 4   | <a href="https://mibig.secondarymetabolites.org/go/BGC0001209/1">https://mibig.secondarymetabolites.org/go/BGC0001209/1</a> | streptide   | 1   |
| ORT-AF10-26-O-BH  | 4   | <a href="https://mibig.secondarymetabolites.org/go/BGC0001929/1">https://mibig.secondarymetabolites.org/go/BGC0001929/1</a> | WGK         | 0.8 |
| ORT-AF10-C6       | 191 | <a href="https://mibig.secondarymetabolites.org/go/BGC0000942/1">https://mibig.secondarymetabolites.org/go/BGC0000942/1</a> | petrobactin | 1   |
| ORT-AF10-C6       | 191 | <a href="https://mibig.secondarymetabolites.org/go/BGC0001356/1">https://mibig.secondarymetabolites.org/go/BGC0001356/1</a> | paeninodin  | 1   |
| ORT-AF10-C15      | 191 | <a href="https://mibig.secondarymetabolites.org/go/BGC0001356/1">https://mibig.secondarymetabolites.org/go/BGC0001356/1</a> | paeninodin  | 1   |
| ORT-AF10-C15      | 191 | <a href="https://mibig.secondarymetabolites.org/go/BGC0000942/1">https://mibig.secondarymetabolites.org/go/BGC0000942/1</a> | petrobactin | 1   |

Supplementary Table 3. The functional annotation of the COGR genomes (VFDB)

| Genome            | Cluster | VF_name        | VF_ID  | Vf_category                                 |
|-------------------|---------|----------------|--------|---------------------------------------------|
| ODP-AF03-102      | 107     | PI-2           | VF0530 | Adherence                                   |
| ODP-AF03-102      | 107     | Capsule        | VF0144 | Immune modulation                           |
| ODP-AF03-102      | 107     | Neuraminidase  | VF0148 | Exoenzyme                                   |
| ODP-AF03-106      | 21      | Capsule        | VF0361 | Immune modulation                           |
| ODP-AF03-106      | 21      | EfaA           | VF0354 | Adherence                                   |
| ODP-AF03-106      | 21      | Ebp pili       | VF0538 | Adherence                                   |
| ODP-AF03-106      | 21      | Hyaluronidase  | VF0359 | Exoenzyme                                   |
| ODP-AF03-106      | 21      | ClpP           | VF0074 | Stress survival                             |
| ODP-AF03-248      | 145     | ClpP           | VF0074 | Stress survival                             |
| ODP-AF03-248      | 145     | BslA           | VF0411 | Regulation                                  |
| ODP-AF03-248      | 145     | ClpC           | VF0072 | Stress survival                             |
| ODP-AF04-105      | 49      | IgA1 protease  | VF0147 | Immune modulation                           |
| ODP-AF04-105      | 49      | ClpP           | VF0074 | Stress survival                             |
| ODP-AF04-105      | 49      | PsaA           | VF0151 | Nutritional/Metabolic factor                |
| ODP-AF04-114      | 43      | ClpP           | VF0074 | Stress survival                             |
| ODP-AF04-151      | 23      | ClpP           | VF0074 | Stress survival                             |
| ODP-AF04-151      | 23      | GroEL          | VF0594 | Adherence                                   |
| ODP-AF04-152      | 23      | ClpP           | VF0074 | Stress survival                             |
| ODP-AF04-152      | 23      | GroEL          | VF0594 | Adherence                                   |
| ODP-AF04-155      | 23      | ClpP           | VF0074 | Stress survival                             |
| ODP-AF04-155      | 23      | GroEL          | VF0594 | Adherence                                   |
| ODP-AF04-158      | 23      | ClpP           | VF0074 | Stress survival                             |
| ODP-AF04-158      | 23      | GroEL          | VF0594 | Adherence                                   |
| ODP-AF04-161      | 23      | ClpP           | VF0074 | Stress survival                             |
| ODP-AF04-161      | 23      | GroEL          | VF0594 | Adherence                                   |
| ODP-AF04-166      | 3       | PavB           | VF0524 | Adherence                                   |
| ODP-AF04-244      | 23      | ClpP           | VF0074 | Stress survival                             |
| ODP-AF04-244      | 23      | GroEL          | VF0594 | Adherence                                   |
| ODP-AF04-83       | 8       | Capsule        | VF0144 | Immune modulation                           |
| ODP-AF04-83       | 8       | Capsule        | VF0361 | Immune modulation                           |
| ODP-AF04-83       | 8       | Neuraminidase  | VF0148 | Exoenzyme                                   |
| ODP-AF04-83       | 8       | IgA1 protease  | VF0147 | Immune modulation                           |
| ODP-AF04-83       | 8       | PfbA           | VF0525 | Adherence                                   |
| ODP-AF04-88       | 9       | Capsule        | VF0144 | Immune modulation                           |
| ODP-AF04-88       | 9       | PfbA           | VF0525 | Adherence                                   |
| ODP-AF04-88       | 9       | CBPs           | VF0145 | Adherence                                   |
| ODP-AF04-88       | 9       | Capsule        | VF0361 | Immune modulation                           |
| ODP-AF04-94       | 9       | Capsule        | VF0144 | Immune modulation                           |
| ODP-AF04-94       | 9       | PfbA           | VF0525 | Adherence                                   |
| ODP-AF04-94       | 9       | Capsule        | VF0361 | Immune modulation                           |
| ODP-AF04-94       | 9       | CBPs           | VF0145 | Adherence                                   |
| ODP-AF05-203      | 61      | Capsule        | VF0144 | Immune modulation                           |
| ODP-AF05-203      | 61      | SpaP           | VF0526 | Adherence                                   |
| ODP-AF06-103      | 23      | GroEL          | VF0594 | Adherence                                   |
| ODP-AF06-103      | 23      | ClpP           | VF0074 | Stress survival                             |
| ODP-AF06-107      | 154     | PavB           | VF0524 | Adherence                                   |
| ODP-AF06-108      | 93      | PI-2           | VF0530 | Adherence                                   |
| ODP-AF06-108      | 93      | Capsule        | VF0144 | Immune modulation                           |
| ODP-AF06-108      | 93      | PavB           | VF0524 | Adherence                                   |
| ODP-AF06-108      | 93      | PfbA           | VF0525 | Adherence                                   |
| ODP-AF06-99       | 101     | Capsule        | VF0144 | Immune modulation                           |
| ODP-AF06-99       | 101     | Capsule        | VF0361 | Immune modulation                           |
| ODP-AF06-99       | 101     | CBPs           | VF0145 | Adherence                                   |
| ODP-AF08-10-MRS   | 107     | Capsule        | VF0144 | Immune modulation                           |
| ODP-AF08-10-MRS   | 107     | PI-2           | VF0530 | Adherence                                   |
| ODP-AF08-10-MRS   | 107     | PavB           | VF0524 | Adherence                                   |
| ODP-AF08-11-O-MRS | 61      | Capsule        | VF0144 | Immune modulation                           |
| ODP-AF08-13-MRS   | 46      | Capsule        | VF0144 | Immune modulation                           |
| ODP-AF08-16-MRS   | 46      | Capsule        | VF0144 | Immune modulation                           |
| ODP-AF08-17-MRS   | 113     | PavB           | VF0524 | Adherence                                   |
| ODP-AF08-18-O-MRS | 4       | PavB           | VF0524 | Adherence                                   |
| ODP-AF08-20-MRS   | 46      | Capsule        | VF0144 | Immune modulation                           |
| ODP-AF08-20       | 21      | Capsule        | VF0361 | Immune modulation                           |
| ODP-AF08-20       | 21      | EfaA           | VF0354 | Adherence                                   |
| ODP-AF08-20       | 21      | ClpP           | VF0074 | Stress survival                             |
| ODP-AF08-21-MRS   | 107     | Capsule        | VF0144 | Immune modulation                           |
| ODP-AF08-21-MRS   | 107     | PavB           | VF0524 | Adherence                                   |
| ODP-AF08-21-MRS   | 107     | PI-2           | VF0530 | Adherence                                   |
| ODP-AF08-22-MRS   | 177     | ClpP           | VF0074 | Stress survival                             |
| ODP-AF08-23-MRS   | 107     | Capsule        | VF0144 | Immune modulation                           |
| ODP-AF08-23-MRS   | 107     | PI-2           | VF0530 | Adherence                                   |
| ODP-AF08-23-MRS   | 107     | PavB           | VF0524 | Adherence                                   |
| ODP-AF08-25-O-MRS | 61      | Capsule        | VF0144 | Immune modulation                           |
| ODP-AF08-27-O-MRS | 61      | Capsule        | VF0144 | Immune modulation                           |
| ODP-AF08-28-MRS   | 23      | GroEL          | VF0594 | Adherence                                   |
| ODP-AF08-28-MRS   | 23      | Autolysin      | VF0143 | Exoenzyme                                   |
| ODP-AF08-28-MRS   | 23      | ClpP           | VF0074 | Stress survival                             |
| ODP-AF08-2-MRS    | 104     | SpaP           | VF0526 | Adherence                                   |
| ODP-AF08-2        | 107     | PavB           | VF0524 | Adherence                                   |
| ODP-AF08-2        | 107     | Capsule        | VF0144 | Immune modulation                           |
| ODP-AF08-2        | 107     | PI-2           | VF0530 | Adherence                                   |
| ODP-AF08-35-MRS   | 107     | Capsule        | VF0144 | Immune modulation                           |
| ODP-AF08-35-MRS   | 107     | PI-2           | VF0530 | Adherence                                   |
| ODP-AF08-35-MRS   | 107     | PavB           | VF0524 | Adherence                                   |
| ODP-AF08-36-MRS   | 107     | Capsule        | VF0144 | Immune modulation                           |
| ODP-AF08-36-MRS   | 107     | PI-2           | VF0530 | Adherence                                   |
| ODP-AF08-36-MRS   | 107     | PavB           | VF0524 | Adherence                                   |
| ODP-AF08-37-MRS   | 23      | GroEL          | VF0594 | Adherence                                   |
| ODP-AF08-37-MRS   | 23      | ClpP           | VF0074 | Stress survival                             |
| ODP-AF08-38-MRS   | 11      | PI-2           | VF0530 | Adherence                                   |
| ODP-AF08-38-MRS   | 11      | Capsule        | VF0144 | Immune modulation                           |
| ODP-AF08-38-MRS   | 11      | Neuraminidase  | VF0148 | Exoenzyme                                   |
| ODP-AF08-38-MRS   | 11      | PavB           | VF0524 | Adherence                                   |
| ODP-AF08-39-MRS   | 170     | Capsule        | VF0144 | Immune modulation                           |
| ODP-AF08-39-MRS   | 170     | CBPs           | VF0145 | Adherence                                   |
| ODP-AF08-39-MRS   | 170     | PfbA           | VF0525 | Adherence                                   |
| ODP-AF08-3        | 46      | PavB           | VF0524 | Adherence                                   |
| ODP-AF08-3        | 46      | Capsule        | VF0144 | Immune modulation                           |
| ODP-AF08-40-MRS   | 46      | Capsule        | VF0144 | Immune modulation                           |
| ODP-AF08-41-MRS   | 107     | Capsule        | VF0144 | Immune modulation                           |
| ODP-AF08-41-MRS   | 107     | PavB           | VF0524 | Adherence                                   |
| ODP-AF08-41-MRS   | 107     | PI-2           | VF0530 | Adherence                                   |
| ODP-AF08-42-MRS   | 170     | PfbA           | VF0525 | Adherence                                   |
| ODP-AF08-42-MRS   | 170     | CBPs           | VF0145 | Adherence                                   |
| ODP-AF08-42-MRS   | 170     | Capsule        | VF0144 | Immune modulation                           |
| ODP-AF08-7-MRS    | 107     | Capsule        | VF0144 | Immune modulation                           |
| ODP-AF08-7-MRS    | 107     | PI-2           | VF0530 | Adherence                                   |
| ODP-AF08-7-MRS    | 107     | PavB           | VF0524 | Adherence                                   |
| ODP-AF08-8-MRS    | 107     | Capsule        | VF0144 | Immune modulation                           |
| ODP-AF08-8-MRS    | 107     | PI-2           | VF0530 | Adherence                                   |
| ODP-AF08-8-MRS    | 107     | PavB           | VF0524 | Adherence                                   |
| ODP-AF10-17-O-BH  | 187     | Polar flagella | VF0473 | Motility                                    |
| ODP-AF10-17-O-BH  | 187     | MntABC         | VF0455 | Stress survival                             |
| ODP-AF10-17-O-BH  | 187     | Type IV pili   | VF0075 | Adherence                                   |
| ODP-AF10-18-O-BH  | 15      | Polar flagella | VF0473 | Motility                                    |
| ODP-AF10-18-O-BH  | 15      | Capsule        | VF0079 | Immune modulation                           |
| ODP-AF10-18-O-BH  | 15      | MntABC         | VF0455 | Stress survival                             |
| ODP-AF10-18-O-BH  | 15      | HmbR           | VF0048 | Nutritional/Metabolic factor                |
| ODP-AF10-18-O-BH  | 15      | MtrCDE         | VF0451 | ntimicrobial activity/Competitive advantage |

|                  |     |                |        |                                             |
|------------------|-----|----------------|--------|---------------------------------------------|
| ODP-AF10-18-O-BH | 15  | Type IV pili   | VF0075 | Adherence                                   |
| ODP-AF10-25-O-BH | 187 | Polar flagella | VF0473 | Motility                                    |
| ODP-AF10-25-O-BH | 187 | MntABC         | VF0455 | Stress survival                             |
| ODP-AF10-25-O-BH | 187 | Type IV pili   | VF0075 | Adherence                                   |
| ODP-AF10-31-O-BH | 21  | SprE           | VF0358 | Exoenzyme                                   |
| ODP-AF10-31-O-BH | 21  | Gelatinase     | VF0357 | Exoenzyme                                   |
| ODP-AF10-31-O-BH | 21  | Fsr            | VF0360 | Biofilm                                     |
| ODP-AF10-31-O-BH | 21  | EfaA           | VF0354 | Adherence                                   |
| ODP-AF10-31-O-BH | 21  | ClpP           | VF0074 | Stress survival                             |
| ODP-AF10-31-O-BH | 21  | Capsule        | VF0361 | Immune modulation                           |
| ODP-AF10-C21     | 107 | PfbA           | VF0525 | Adherence                                   |
| ODP-AF10-C21     | 107 | PI-2           | VF0530 | Adherence                                   |
| ODP-AF10-C21     | 107 | Capsule        | VF0144 | Immune modulation                           |
| ODP-AF10-C21     | 107 | Neuraminidase  | VF0148 | Exoenzyme                                   |
| ODP-AF10-C21     | 107 | PavB           | VF0524 | Adherence                                   |
| ODP-AF10-C23     | 188 | Capsule        | VF0144 | Immune modulation                           |
| ODP-AF10-C23     | 188 | Neuraminidase  | VF0148 | Exoenzyme                                   |
| ODP-AF10-C23     | 188 | PfbA           | VF0525 | Adherence                                   |
| ODP-AF10-C23     | 188 | PavB           | VF0524 | Adherence                                   |
| ODP-AF10-C3      | 37  | ClpP           | VF0074 | Stress survival                             |
| ODP-AF10-C6      | 46  | Capsule        | VF0144 | Immune modulation                           |
| ODP-AM01-02BB    | 107 | PI-2           | VF0530 | Adherence                                   |
| ODP-AM01-02BB    | 107 | Capsule        | VF0144 | Immune modulation                           |
| ODP-AM01-02BB    | 107 | Neuraminidase  | VF0148 | Exoenzyme                                   |
| ODP-AM01-02O     | 15  | Capsule        | VF0079 | Immune modulation                           |
| ODP-AM01-02O     | 15  | MntABC         | VF0455 | Stress survival                             |
| ODP-AM01-05      | 65  | ClpP           | VF0074 | Stress survival                             |
| ODP-AM01-06      | 133 | K1 capsule     | VF0239 | Invasion                                    |
| ODP-AM01-08      | 107 | PI-2           | VF0530 | Adherence                                   |
| ODP-AM01-08      | 107 | Capsule        | VF0144 | Immune modulation                           |
| ODP-AM01-08      | 107 | Neuraminidase  | VF0148 | Exoenzyme                                   |
| ODP-AM01-10      | 134 | ClpP           | VF0074 | Stress survival                             |
| ODP-AM01-10      | 134 | LPS            | VF0367 | Immune modulation                           |
| ODP-AM01-10      | 134 | Capsule        | VF0144 | Immune modulation                           |
| ODP-AM04-107     | 4   | PavB           | VF0524 | Adherence                                   |
| ODP-AM04-126     | 15  | MtrCDE         | VF0451 | ntimicrobial activity/Competitive advantage |
| ODP-AM04-126     | 15  | Capsule        | VF0079 | Immune modulation                           |
| ODP-AM04-126     | 15  | MntABC         | VF0455 | Stress survival                             |
| ODP-AM04-45      | 124 | PavB           | VF0524 | Adherence                                   |
| ODP-AM04-46      | 4   | PavB           | VF0524 | Adherence                                   |
| ODP-AM04-51      | 151 | ClpP           | VF0074 | Stress survival                             |
| ODP-AM04-51      | 151 | PsaA           | VF0151 | Nutritional/Metabolic factor                |
| ODP-AM04-52      | 34  | GroEL          | VF0594 | Adherence                                   |
| ODP-AM04-52      | 34  | ClpP           | VF0074 | Stress survival                             |
| ODP-AM05-19      | 31  | Capsule        | VF0144 | Immune modulation                           |
| ODP-AM05-19      | 31  | PavB           | VF0524 | Adherence                                   |
| ODP-AM05-22      | 23  | ClpP           | VF0074 | Stress survival                             |
| ODP-AM05-244     | 61  | SpaP           | VF0526 | Adherence                                   |
| ODP-AM05-244     | 61  | Capsule        | VF0144 | Immune modulation                           |
| ODP-AM05-248     | 61  | SpaP           | VF0526 | Adherence                                   |
| ODP-AM05-248     | 61  | Capsule        | VF0144 | Immune modulation                           |
| ODP-AM05-249     | 23  | ClpP           | VF0074 | Stress survival                             |
| ODP-AM05-249     | 23  | GroEL          | VF0594 | Adherence                                   |
| ODP-AM05-24      | 63  | PavB           | VF0524 | Adherence                                   |
| ODP-AM05-252     | 101 | Capsule        | VF0144 | Immune modulation                           |
| ODP-AM05-252     | 101 | PfbA           | VF0525 | Adherence                                   |
| ODP-AM05-252     | 101 | CBPs           | VF0145 | Adherence                                   |
| ODP-AM05-252     | 101 | PavB           | VF0524 | Adherence                                   |
| ODP-AM05-252     | 101 | Capsule        | VF0361 | Immune modulation                           |
| ODP-AM05-255     | 30  | GroEL          | VF0594 | Adherence                                   |
| ODP-AM05-255     | 30  | ClpP           | VF0074 | Stress survival                             |
| ODP-AM05-25      | 11  | Capsule        | VF0144 | Immune modulation                           |
| ODP-AM05-25      | 11  | Neuraminidase  | VF0148 | Exoenzyme                                   |
| ODP-AM05-25      | 11  | PavB           | VF0524 | Adherence                                   |
| ODP-AM05-262     | 46  | Capsule        | VF0144 | Immune modulation                           |
| ODP-AM05-263     | 35  | Capsule        | VF0144 | Immune modulation                           |
| ODP-AM05-263     | 35  | Neuraminidase  | VF0148 | Exoenzyme                                   |
| ODP-AM05-263     | 35  | PavB           | VF0524 | Adherence                                   |
| ODP-AM05-264     | 11  | Capsule        | VF0144 | Immune modulation                           |
| ODP-AM05-264     | 11  | Neuraminidase  | VF0148 | Exoenzyme                                   |
| ODP-AM05-264     | 11  | PavB           | VF0524 | Adherence                                   |
| ODP-AM05-265     | 61  | SpaP           | VF0526 | Adherence                                   |
| ODP-AM05-265     | 61  | Capsule        | VF0144 | Immune modulation                           |
| ODP-AM05-266     | 46  | Capsule        | VF0144 | Immune modulation                           |
| ODP-AM05-267     | 11  | Capsule        | VF0144 | Immune modulation                           |
| ODP-AM05-267     | 11  | Neuraminidase  | VF0148 | Exoenzyme                                   |
| ODP-AM05-267     | 11  | PavB           | VF0524 | Adherence                                   |
| ODP-AM05-271     | 34  | GroEL          | VF0594 | Adherence                                   |
| ODP-AM05-271     | 34  | ClpP           | VF0074 | Stress survival                             |
| ODP-AM05-272     | 30  | GroEL          | VF0594 | Adherence                                   |
| ODP-AM05-272     | 30  | ClpP           | VF0074 | Stress survival                             |
| ODP-AM05-273     | 61  | SpaP           | VF0526 | Adherence                                   |
| ODP-AM05-273     | 61  | Capsule        | VF0144 | Immune modulation                           |
| ODP-AM05-303     | 44  | Polar flagella | VF0473 | Motility                                    |
| ODP-AM05-303     | 44  | MtrCDE         | VF0451 | ntimicrobial activity/Competitive advantage |
| ODP-AM05-303     | 44  | MntABC         | VF0455 | Stress survival                             |
| ODP-AM05-303     | 44  | Type IV pili   | VF0075 | Adherence                                   |
| ODP-AM05-306     | 64  | HmbR           | VF0048 | Nutritional/Metabolic factor                |
| ODP-AM05-306     | 64  | Capsule        | VF0079 | Immune modulation                           |
| ODP-AM05-306     | 64  | MntABC         | VF0455 | Stress survival                             |
| ODP-AM05-321     | 15  | MtrCDE         | VF0451 | ntimicrobial activity/Competitive advantage |
| ODP-AM05-321     | 15  | MntABC         | VF0455 | Stress survival                             |
| ODP-AM05-321     | 15  | Polar flagella | VF0473 | Motility                                    |
| ODP-AM05-34      | 61  | SpaP           | VF0526 | Adherence                                   |
| ODP-AM05-34      | 61  | Capsule        | VF0144 | Immune modulation                           |
| ODP-AM05-388     | 65  | ClpP           | VF0074 | Stress survival                             |
| ODP-AM05-395     | 46  | Capsule        | VF0144 | Immune modulation                           |
| ODP-AM05-41      | 61  | SpaP           | VF0526 | Adherence                                   |
| ODP-AM05-41      | 61  | Capsule        | VF0144 | Immune modulation                           |
| ODP-AM05-440     | 125 | WhiB3          | VF0288 | Regulation                                  |
| ODP-AM05-456     | 88  | Capsule        | VF0144 | Immune modulation                           |
| ODP-AM05-456     | 88  | ClpP           | VF0074 | Stress survival                             |
| ODP-AM05-456     | 88  | Capsule I      | VF0436 | Immune modulation                           |
| ODP-AM05-457     | 89  | Neuraminidase  | VF0148 | Exoenzyme                                   |
| ODP-AM05-457     | 89  | Capsule        | VF0144 | Immune modulation                           |
| ODP-AM05-458     | 89  | Neuraminidase  | VF0148 | Exoenzyme                                   |
| ODP-AM05-458     | 89  | Capsule        | VF0144 | Immune modulation                           |
| ODP-AM05-46      | 15  | MntABC         | VF0455 | Stress survival                             |
| ODP-AM05-46      | 15  | MtrCDE         | VF0451 | ntimicrobial activity/Competitive advantage |
| ODP-AM05-46      | 15  | Polar flagella | VF0473 | Motility                                    |
| ODP-AM05-49      | 11  | Capsule        | VF0144 | Immune modulation                           |
| ODP-AM05-49      | 11  | Neuraminidase  | VF0148 | Exoenzyme                                   |
| ODP-AM05-49      | 11  | PavB           | VF0524 | Adherence                                   |
| ODP-AM05-503     | 63  | PavB           | VF0524 | Adherence                                   |
| ODP-AM05-504     | 116 | CBPs           | VF0145 | Adherence                                   |
| ODP-AM05-504     | 116 | Capsule        | VF0144 | Immune modulation                           |
| ODP-AM05-504     | 116 | Neuraminidase  | VF0148 | Exoenzyme                                   |
| ODP-AM05-506     | 89  | Neuraminidase  | VF0148 | Exoenzyme                                   |
| ODP-AM05-506     | 89  | Capsule        | VF0144 | Immune modulation                           |
| ODP-AM05-535     | 11  | Capsule        | VF0144 | Immune modulation                           |
| ODP-AM05-535     | 11  | Neuraminidase  | VF0148 | Exoenzyme                                   |

|                   |     |                  |        |                              |
|-------------------|-----|------------------|--------|------------------------------|
| ODP-AM05-535      | 11  | PavB             | VF0524 | Adherence                    |
| ODP-AM05-73       | 63  | PavB             | VF0524 | Adherence                    |
| ODP-AM05-78       | 63  | PavB             | VF0524 | Adherence                    |
| ODP-AM05-80       | 31  | Capsule          | VF0144 | Immune modulation            |
| ODP-AM05-80       | 31  | PavB             | VF0524 | Adherence                    |
| ODP-AM08-275      | 4   | PavB             | VF0524 | Adherence                    |
| ODP-AM08-280      | 25  | GroEL            | VF0594 | Adherence                    |
| ODP-AM08-280      | 25  | ClpP             | VF0074 | Stress survival              |
| ODP-AM08-282      | 37  | ClpP             | VF0074 | Stress survival              |
| ODP-AM08-289      | 69  | GroEL            | VF0594 | Adherence                    |
| ODP-AM08-289      | 69  | ClpP             | VF0074 | Stress survival              |
| ODP-AM08-297      | 37  | ClpP             | VF0074 | Stress survival              |
| ODP-AM08-304      | 17  | ClpP             | VF0074 | Stress survival              |
| ODP-AM08-308      | 63  | PavB             | VF0524 | Adherence                    |
| ODP-AM08-309      | 36  | PavB             | VF0524 | Adherence                    |
| ODP-AM08-310      | 23  | ClpP             | VF0074 | Stress survival              |
| ODP-AM08-316      | 37  | ClpP             | VF0074 | Stress survival              |
| ODP-AM08-325      | 23  | ClpP             | VF0074 | Stress survival              |
| ODP-AM08-335      | 23  | ClpP             | VF0074 | Stress survival              |
| ODP-AM08-337      | 17  | ClpP             | VF0074 | Stress survival              |
| ODP-AM08-337      | 17  | PavB             | VF0524 | Adherence                    |
| ODP-AM08-393      | 65  | ClpP             | VF0074 | Stress survival              |
| ODP-AM08-396      | 37  | ClpP             | VF0074 | Stress survival              |
| ODP-AM08-398      | 108 | Autolysin        | VF0143 | Exoenzyme                    |
| ODP-AM08-398      | 108 | Capsule          | VF0144 | Immune modulation            |
| ODP-AM08-398      | 108 | Neuraminidase    | VF0148 | Exoenzyme                    |
| ODP-AM08-398      | 108 | PavB             | VF0524 | Adherence                    |
| ODP-AM08-403      | 23  | ClpP             | VF0074 | Stress survival              |
| ODP-AM09-10-104   | 157 | Capsule          | VF0144 | Immune modulation            |
| ODP-AM09-10-104   | 157 | PfbA             | VF0525 | Adherence                    |
| ODP-AM09-10-104   | 157 | Neuraminidase    | VF0148 | Exoenzyme                    |
| ODP-AM09-10-O-104 | 107 | PI-2             | VF0530 | Adherence                    |
| ODP-AM09-10-O-104 | 107 | Capsule          | VF0144 | Immune modulation            |
| ODP-AM09-10-O-104 | 107 | PavB             | VF0524 | Adherence                    |
| ODP-AM09-10-O-BH  | 159 | Neuraminidase    | VF0148 | Exoenzyme                    |
| ODP-AM09-11-104   | 104 | SpaP             | VF0526 | Adherence                    |
| ODP-AM09-11-BH    | 63  | PavB             | VF0524 | Adherence                    |
| ODP-AM09-1-1-O-BH | 162 | Neuraminidase    | VF0148 | Exoenzyme                    |
| ODP-AM09-1-1-O-BH | 162 | Capsule          | VF0144 | Immune modulation            |
| ODP-AM09-1-1-O-BH | 162 | PavB             | VF0524 | Adherence                    |
| ODP-AM09-12-104   | 158 | PfbA             | VF0525 | Adherence                    |
| ODP-AM09-12-104   | 158 | Neuraminidase    | VF0148 | Exoenzyme                    |
| ODP-AM09-12-O-104 | 46  | Capsule          | VF0144 | Immune modulation            |
| ODP-AM09-1-2-O-BH | 162 | Neuraminidase    | VF0148 | Exoenzyme                    |
| ODP-AM09-1-2-O-BH | 162 | Capsule          | VF0144 | Immune modulation            |
| ODP-AM09-1-2-O-BH | 162 | PavB             | VF0524 | Adherence                    |
| ODP-AM09-12-O-BH  | 157 | Capsule          | VF0144 | Immune modulation            |
| ODP-AM09-12-O-BH  | 157 | Neuraminidase    | VF0148 | Exoenzyme                    |
| ODP-AM09-12-O-BH  | 157 | PfbA             | VF0525 | Adherence                    |
| ODP-AM09-13-104   | 158 | PfbA             | VF0525 | Adherence                    |
| ODP-AM09-13-104   | 158 | Neuraminidase    | VF0148 | Exoenzyme                    |
| ODP-AM09-13-O-BH  | 63  | PavB             | VF0524 | Adherence                    |
| ODP-AM09-14-104   | 184 | Autolysin        | VF0143 | Exoenzyme                    |
| ODP-AM09-14-104   | 184 | Capsule          | VF0144 | Immune modulation            |
| ODP-AM09-14-BH    | 168 | Capsule          | VF0274 | Immune modulation            |
| ODP-AM09-14-BH    | 168 | PavB             | VF0524 | Adherence                    |
| ODP-AM09-15-104   | 157 | Capsule          | VF0144 | Immune modulation            |
| ODP-AM09-15-104   | 157 | Neuraminidase    | VF0148 | Exoenzyme                    |
| ODP-AM09-15-104   | 157 | PfbA             | VF0525 | Adherence                    |
| ODP-AM09-16-O-104 | 107 | Capsule          | VF0144 | Immune modulation            |
| ODP-AM09-16-O-104 | 107 | PI-2             | VF0530 | Adherence                    |
| ODP-AM09-16-O-104 | 107 | PavB             | VF0524 | Adherence                    |
| ODP-AM09-16-O-BH  | 163 | Neuraminidase    | VF0148 | Exoenzyme                    |
| ODP-AM09-16-O-BH  | 163 | PfbA             | VF0525 | Adherence                    |
| ODP-AM09-16-O-BH  | 163 | CBPs             | VF0145 | Adherence                    |
| ODP-AM09-16-O-BH  | 163 | Capsule          | VF0144 | Immune modulation            |
| ODP-AM09-16-O-BH  | 163 | Capsule          | VF0361 | Immune modulation            |
| ODP-AM09-17-104   | 107 | Capsule          | VF0144 | Immune modulation            |
| ODP-AM09-17-104   | 107 | PI-2             | VF0530 | Adherence                    |
| ODP-AM09-17-104   | 107 | Neuraminidase    | VF0148 | Exoenzyme                    |
| ODP-AM09-18-104   | 63  | PavB             | VF0524 | Adherence                    |
| ODP-AM09-18-O-104 | 157 | Capsule          | VF0144 | Immune modulation            |
| ODP-AM09-18-O-104 | 157 | Neuraminidase    | VF0148 | Exoenzyme                    |
| ODP-AM09-18-O-104 | 157 | PavB             | VF0524 | Adherence                    |
| ODP-AM09-19-O-104 | 157 | Capsule          | VF0144 | Immune modulation            |
| ODP-AM09-19-O-104 | 157 | Neuraminidase    | VF0148 | Exoenzyme                    |
| ODP-AM09-19-O-104 | 157 | PavB             | VF0524 | Adherence                    |
| ODP-AM09-19-O-BH  | 164 | Isocitrate lyase | VF0253 | Others                       |
| ODP-AM09-19-O-BH  | 164 | ClpP             | VF0074 | Stress survival              |
| ODP-AM09-19-O-BH  | 164 | ClpC             | VF0072 | Stress survival              |
| ODP-AM09-19-O-BH  | 164 | Petrobactin      | VF0584 | Nutritional/Metabolic factor |
| ODP-AM09-1-BH     | 157 | Capsule          | VF0144 | Immune modulation            |
| ODP-AM09-1-BH     | 157 | Neuraminidase    | VF0148 | Exoenzyme                    |
| ODP-AM09-1-BH     | 157 | PfbA             | VF0525 | Adherence                    |
| ODP-AM09-20-104   | 158 | PfbA             | VF0525 | Adherence                    |
| ODP-AM09-20-O-104 | 170 | PfbA             | VF0525 | Adherence                    |
| ODP-AM09-20-O-104 | 170 | CBPs             | VF0145 | Adherence                    |
| ODP-AM09-20-O-104 | 170 | Capsule          | VF0144 | Immune modulation            |
| ODP-AM09-20-O-BH  | 157 | Capsule          | VF0144 | Immune modulation            |
| ODP-AM09-20-O-BH  | 157 | Neuraminidase    | VF0148 | Exoenzyme                    |
| ODP-AM09-20-O-BH  | 157 | PfbA             | VF0525 | Adherence                    |
| ODP-AM09-21-104   | 158 | PfbA             | VF0525 | Adherence                    |
| ODP-AM09-21-O-104 | 107 | PI-2             | VF0530 | Adherence                    |
| ODP-AM09-21-O-104 | 107 | Capsule          | VF0144 | Immune modulation            |
| ODP-AM09-21-O-104 | 107 | Neuraminidase    | VF0148 | Exoenzyme                    |
| ODP-AM09-21-O-104 | 107 | PavB             | VF0524 | Adherence                    |
| ODP-AM09-22-104   | 63  | PavB             | VF0524 | Adherence                    |
| ODP-AM09-22-BH    | 157 | Capsule          | VF0144 | Immune modulation            |
| ODP-AM09-22-BH    | 157 | PfbA             | VF0525 | Adherence                    |
| ODP-AM09-22-BH    | 157 | Neuraminidase    | VF0148 | Exoenzyme                    |
| ODP-AM09-22-O-104 | 107 | Neuraminidase    | VF0148 | Exoenzyme                    |
| ODP-AM09-22-O-104 | 107 | PI-2             | VF0530 | Adherence                    |
| ODP-AM09-22-O-104 | 107 | Capsule          | VF0144 | Immune modulation            |
| ODP-AM09-22-O-104 | 107 | PavB             | VF0524 | Adherence                    |
| ODP-AM09-23-104   | 163 | Neuraminidase    | VF0148 | Exoenzyme                    |
| ODP-AM09-23-104   | 163 | PfbA             | VF0525 | Adherence                    |
| ODP-AM09-23-104   | 163 | CBPs             | VF0145 | Adherence                    |
| ODP-AM09-23-104   | 163 | Capsule          | VF0361 | Immune modulation            |
| ODP-AM09-23-104   | 163 | Capsule          | VF0144 | Immune modulation            |
| ODP-AM09-23-104   | 163 | PavB             | VF0524 | Adherence                    |
| ODP-AM09-23-BH    | 107 | PI-2             | VF0530 | Adherence                    |
| ODP-AM09-23-BH    | 107 | Capsule          | VF0144 | Immune modulation            |
| ODP-AM09-23-BH    | 107 | Neuraminidase    | VF0148 | Exoenzyme                    |
| ODP-AM09-23-O-104 | 107 | Capsule          | VF0144 | Immune modulation            |
| ODP-AM09-23-O-104 | 107 | PI-2             | VF0530 | Adherence                    |
| ODP-AM09-23-O-104 | 107 | PavB             | VF0524 | Adherence                    |
| ODP-AM09-24-BH    | 157 | Capsule          | VF0144 | Immune modulation            |
| ODP-AM09-24-BH    | 157 | PfbA             | VF0525 | Adherence                    |
| ODP-AM09-24-BH    | 157 | Neuraminidase    | VF0148 | Exoenzyme                    |
| ODP-AM09-26-104   | 107 | PI-2             | VF0530 | Adherence                    |
| ODP-AM09-26-104   | 107 | Capsule          | VF0144 | Immune modulation            |



|                  |     |               |        |                              |
|------------------|-----|---------------|--------|------------------------------|
| ODP-AM09-26-104  | 107 | Neuraminidase | VF0148 | Exoenzyme                    |
| ODP-AM09-27-104  | 163 | Neuraminidase | VF0148 | Exoenzyme                    |
| ODP-AM09-27-104  | 163 | PfbA          | VF0525 | Adherence                    |
| ODP-AM09-27-104  | 163 | CBPs          | VF0145 | Adherence                    |
| ODP-AM09-27-104  | 163 | Capsule       | VF0361 | Immune modulation            |
| ODP-AM09-27-104  | 163 | Capsule       | VF0144 | Immune modulation            |
| ODP-AM09-27-BH   | 161 | Capsule       | VF0144 | Immune modulation            |
| ODP-AM09-27-BH   | 161 | CBPs          | VF0145 | Adherence                    |
| ODP-AM09-2D18    | 178 | ClpP          | VF0074 | Stress survival              |
| ODP-AM09-2D21    | 178 | ClpP          | VF0074 | Stress survival              |
| ODP-AM09-2D3B    | 178 | ClpP          | VF0074 | Stress survival              |
| ODP-AM09-2D6     | 21  | Fsr           | VF0360 | Biofilm                      |
| ODP-AM09-2D6     | 21  | Gelatinase    | VF0357 | Exoenzyme                    |
| ODP-AM09-2D6     | 21  | SprE          | VF0358 | Exoenzyme                    |
| ODP-AM09-2D6     | 21  | ClpP          | VF0074 | Stress survival              |
| ODP-AM09-2D6     | 21  | EfaA          | VF0354 | Adherence                    |
| ODP-AM09-2D6     | 21  | Capsule       | VF0361 | Immune modulation            |
| ODP-AM09-2-O-104 | 170 | PfbA          | VF0525 | Adherence                    |
| ODP-AM09-2-O-104 | 170 | CBPs          | VF0145 | Adherence                    |
| ODP-AM09-2-O-104 | 170 | Capsule       | VF0144 | Immune modulation            |
| ODP-AM09-3-104   | 157 | Capsule       | VF0144 | Immune modulation            |
| ODP-AM09-3-104   | 157 | Neuraminidase | VF0148 | Exoenzyme                    |
| ODP-AM09-3-104   | 157 | PfbA          | VF0525 | Adherence                    |
| ODP-AM09-31-O-BH | 63  | PavB          | VF0524 | Adherence                    |
| ODP-AM09-32-BH   | 157 | Capsule       | VF0144 | Immune modulation            |
| ODP-AM09-32-BH   | 157 | Neuraminidase | VF0148 | Exoenzyme                    |
| ODP-AM09-32-BH   | 157 | PfbA          | VF0525 | Adherence                    |
| ODP-AM09-33-BH   | 169 | Capsule       | VF0144 | Immune modulation            |
| ODP-AM09-33-BH   | 169 | Capsule       | VF0361 | Immune modulation            |
| ODP-AM09-33-BH   | 169 | PsaA          | VF0151 | Nutritional/Metabolic factor |
| ODP-AM09-33-BH   | 169 | CBPs          | VF0145 | Adherence                    |
| ODP-AM09-33-O-BH | 63  | PavB          | VF0524 | Adherence                    |
| ODP-AM09-34-BH   | 46  | Capsule       | VF0144 | Immune modulation            |
| ODP-AM09-36-O-BH | 157 | Capsule       | VF0144 | Immune modulation            |
| ODP-AM09-36-O-BH | 157 | Neuraminidase | VF0148 | Exoenzyme                    |
| ODP-AM09-36-O-BH | 157 | PfbA          | VF0525 | Adherence                    |
| ODP-AM09-38-O-BH | 157 | Capsule       | VF0144 | Immune modulation            |
| ODP-AM09-38-O-BH | 157 | Neuraminidase | VF0148 | Exoenzyme                    |
| ODP-AM09-38-O-BH | 157 | PfbA          | VF0525 | Adherence                    |
| ODP-AM09-39-BH   | 63  | PavB          | VF0524 | Adherence                    |
| ODP-AM09-39-O-BH | 85  | Capsule       | VF0144 | Immune modulation            |
| ODP-AM09-39-O-BH | 85  | CBPs          | VF0145 | Adherence                    |
| ODP-AM09-39-O-BH | 85  | Neuraminidase | VF0148 | Exoenzyme                    |
| ODP-AM09-39-O-BH | 85  | PfbA          | VF0525 | Adherence                    |
| ODP-AM09-3-O-BH  | 157 | Capsule       | VF0144 | Immune modulation            |
| ODP-AM09-3-BH    | 157 | Neuraminidase | VF0148 | Exoenzyme                    |
| ODP-AM09-3-BH    | 157 | PfbA          | VF0525 | Adherence                    |
| ODP-AM09-3-O-104 | 170 | PfbA          | VF0525 | Adherence                    |
| ODP-AM09-3-O-104 | 170 | CBPs          | VF0145 | Adherence                    |
| ODP-AM09-3-O-104 | 170 | Capsule       | VF0144 | Immune modulation            |
| ODP-AM09-42-O-BH | 157 | Capsule       | VF0144 | Immune modulation            |
| ODP-AM09-42-O-BH | 157 | Neuraminidase | VF0148 | Exoenzyme                    |
| ODP-AM09-42-O-BH | 157 | PfbA          | VF0525 | Adherence                    |
| ODP-AM09-43-BH   | 63  | PavB          | VF0524 | Adherence                    |
| ODP-AM09-45-O-BH | 157 | Capsule       | VF0144 | Immune modulation            |
| ODP-AM09-45-O-BH | 157 | Neuraminidase | VF0148 | Exoenzyme                    |
| ODP-AM09-45-O-BH | 157 | PfbA          | VF0525 | Adherence                    |
| ODP-AM09-46-O-BH | 163 | Neuraminidase | VF0148 | Exoenzyme                    |
| ODP-AM09-46-O-BH | 163 | PfbA          | VF0525 | Adherence                    |
| ODP-AM09-46-O-BH | 163 | CBPs          | VF0145 | Adherence                    |
| ODP-AM09-46-O-BH | 163 | PavB          | VF0524 | Adherence                    |
| ODP-AM09-46-O-BH | 163 | Capsule       | VF0361 | Immune modulation            |
| ODP-AM09-46-O-BH | 163 | Capsule       | VF0144 | Immune modulation            |
| ODP-AM09-47-O-BH | 157 | Capsule       | VF0144 | Immune modulation            |
| ODP-AM09-47-O-BH | 157 | Neuraminidase | VF0148 | Exoenzyme                    |
| ODP-AM09-47-O-BH | 157 | PfbA          | VF0525 | Adherence                    |
| ODP-AM09-48-O-BH | 63  | PavB          | VF0524 | Adherence                    |
| ODP-AM09-49-O-BH | 79  | Neuraminidase | VF0148 | Exoenzyme                    |
| ODP-AM09-49-O-BH | 79  | Capsule       | VF0144 | Immune modulation            |
| ODP-AM09-4-O-104 | 46  | Capsule       | VF0144 | Immune modulation            |
| ODP-AM09-5-104   | 163 | Neuraminidase | VF0148 | Exoenzyme                    |
| ODP-AM09-5-104   | 163 | PfbA          | VF0525 | Adherence                    |
| ODP-AM09-5-104   | 163 | CBPs          | VF0145 | Adherence                    |
| ODP-AM09-5-104   | 163 | Capsule       | VF0144 | Immune modulation            |
| ODP-AM09-5-104   | 163 | Capsule       | VF0361 | Immune modulation            |
| ODP-AM09-5-O-BH  | 3   | PavB          | VF0524 | Adherence                    |
| ODP-AM09-6-104   | 158 | PfbA          | VF0525 | Adherence                    |
| ODP-AM09-6-O-104 | 107 | Neuraminidase | VF0148 | Exoenzyme                    |
| ODP-AM09-6-O-104 | 107 | PI-2          | VF0530 | Adherence                    |
| ODP-AM09-6-O-104 | 107 | Capsule       | VF0144 | Immune modulation            |
| ODP-AM09-6-O-104 | 107 | PavB          | VF0524 | Adherence                    |
| ODP-AM09-7-BH    | 157 | Capsule       | VF0144 | Immune modulation            |
| ODP-AM09-7-BH    | 157 | Neuraminidase | VF0148 | Exoenzyme                    |
| ODP-AM09-7-BH    | 157 | PfbA          | VF0525 | Adherence                    |
| ODP-AM09-9-104   | 158 | PfbA          | VF0525 | Adherence                    |
| ODP-AM09-9-104   | 158 | Neuraminidase | VF0148 | Exoenzyme                    |
| ODP-AM09-9-O-104 | 107 | Capsule       | VF0144 | Immune modulation            |
| ODP-AM09-9-O-104 | 107 | PI-2          | VF0530 | Adherence                    |
| ODP-AM09-9-O-104 | 107 | PavB          | VF0524 | Adherence                    |
| ODP-AM09-9-O-BH  | 157 | Capsule       | VF0144 | Immune modulation            |
| ODP-AM09-9-O-BH  | 157 | PfbA          | VF0525 | Adherence                    |
| ODP-AM09-9-O-BH  | 157 | Neuraminidase | VF0148 | Exoenzyme                    |
| ODP-TM06-145     | 23  | ClpP          | VF0074 | Stress survival              |
| ODP-TM06-145     | 23  | GroEL         | VF0594 | Adherence                    |
| ODP-TM06-153     | 84  | ClpP          | VF0074 | Stress survival              |
| ODP-TM06-153     | 84  | IgA1 protease | VF0147 | Immune modulation            |
| ODP-TM06-153     | 84  | PsaA          | VF0151 | Nutritional/Metabolic factor |
| ODP-TM06-155     | 23  | GroEL         | VF0594 | Adherence                    |
| ODP-TM06-155     | 23  | ClpP          | VF0074 | Stress survival              |
| ODP-TM06-159     | 102 | Neuraminidase | VF0148 | Exoenzyme                    |
| ODP-TM06-159     | 102 | Capsule       | VF0144 | Immune modulation            |
| ODP-TM06-47      | 63  | PavB          | VF0524 | Adherence                    |
| ODP-TM06-50      | 63  | PavB          | VF0524 | Adherence                    |
| ODP-TM06-55      | 63  | PavB          | VF0524 | Adherence                    |
| ODP-TM07-115     | 23  | GroEL         | VF0594 | Adherence                    |
| ODP-TM07-115     | 23  | ClpP          | VF0074 | Stress survival              |
| ODP-TM07-125     | 34  | GroEL         | VF0594 | Adherence                    |
| ODP-TM07-125     | 34  | ClpP          | VF0074 | Stress survival              |
| ODP-TM07-131     | 34  | GroEL         | VF0594 | Adherence                    |
| ODP-TM07-131     | 34  | ClpP          | VF0074 | Stress survival              |
| ODP-TM07-134     | 92  | ClpP          | VF0074 | Stress survival              |
| ODP-TM07-145     | 34  | GroEL         | VF0594 | Adherence                    |
| ODP-TM07-145     | 34  | ClpP          | VF0074 | Stress survival              |
| ODP-TM07-152     | 34  | GroEL         | VF0594 | Adherence                    |
| ODP-TM07-152     | 34  | ClpP          | VF0074 | Stress survival              |
| ODP-TM07-155     | 23  | ClpP          | VF0074 | Stress survival              |
| ODP-TM07-155     | 23  | GroEL         | VF0594 | Adherence                    |
| ODP-TM07-157     | 92  | ClpP          | VF0074 | Stress survival              |
| ODP-TM07-158     | 36  | PavB          | VF0524 | Adherence                    |
| ODP-TM07-162     | 107 | Capsule       | VF0144 | Immune modulation            |
| ODP-TM07-162     | 107 | PI-2          | VF0530 | Adherence                    |

|                 |     |               |        |                              |
|-----------------|-----|---------------|--------|------------------------------|
| ODP-TM07-162    | 107 | Neuraminidase | VF0148 | Exoenzyme                    |
| ODP-TM07-162    | 107 | PavB          | VF0524 | Adherence                    |
| ODP-TM07-198    | 36  | PavB          | VF0524 | Adherence                    |
| ODP-TM07-209    | 35  | Capsule       | VF0144 | Immune modulation            |
| ODP-TM07-209    | 35  | Neuraminidase | VF0148 | Exoenzyme                    |
| ODP-TM07-209    | 35  | PavB          | VF0524 | Adherence                    |
| ODP-TM07-212    | 11  | Capsule       | VF0144 | Immune modulation            |
| ODP-TM07-212    | 11  | PI-2          | VF0530 | Adherence                    |
| ODP-TM07-212    | 11  | Neuraminidase | VF0148 | Exoenzyme                    |
| ODP-TM07-212    | 11  | PavB          | VF0524 | Adherence                    |
| ODP-TM07-271    | 36  | PavB          | VF0524 | Adherence                    |
| ODP-TM07-272    | 107 | PI-2          | VF0530 | Adherence                    |
| ODP-TM07-272    | 107 | Capsule       | VF0144 | Immune modulation            |
| ODP-TM07-272    | 107 | Neuraminidase | VF0148 | Exoenzyme                    |
| ODP-TM07-272    | 107 | PavB          | VF0524 | Adherence                    |
| ORS-AF03-140    | 1   | ClpP          | VF0074 | Stress survival              |
| ORS-AF03-141    | 79  | Neuraminidase | VF0148 | Exoenzyme                    |
| ORS-AF03-141    | 79  | Capsule       | VF0144 | Immune modulation            |
| ORS-AF03-142    | 1   | ClpP          | VF0074 | Stress survival              |
| ORS-AF03-155    | 141 | PavB          | VF0524 | Adherence                    |
| ORS-AF03-155    | 141 | CBPs          | VF0145 | Adherence                    |
| ORS-AF03-155    | 141 | Capsule       | VF0361 | Immune modulation            |
| ORS-AF03-155    | 141 | PfbA          | VF0525 | Adherence                    |
| ORS-AF03-170    | 89  | Capsule       | VF0144 | Immune modulation            |
| ORS-AF03-170    | 89  | Neuraminidase | VF0148 | Exoenzyme                    |
| ORS-AF04-127    | 52  | PavB          | VF0524 | Adherence                    |
| ORS-AF04-140    | 23  | PfbA          | VF0525 | Adherence                    |
| ORS-AF04-140    | 23  | ClpP          | VF0074 | Stress survival              |
| ORS-AF04-140    | 23  | GroEL         | VF0594 | Adherence                    |
| ORS-AF04-142    | 111 | Neuraminidase | VF0148 | Exoenzyme                    |
| ORS-AF04-142    | 111 | Autolysin     | VF0143 | Exoenzyme                    |
| ORS-AF04-142    | 111 | Capsule       | VF0144 | Immune modulation            |
| ORS-AF04-252    | 7   | PfbA          | VF0525 | Adherence                    |
| ORS-AF04-252    | 7   | Capsule       | VF0144 | Immune modulation            |
| ORS-AF04-252    | 7   | Neuraminidase | VF0148 | Exoenzyme                    |
| ORS-AF04-41     | 3   | PavB          | VF0524 | Adherence                    |
| ORS-AF04-42     | 9   | Capsule       | VF0144 | Immune modulation            |
| ORS-AF04-42     | 9   | PfbA          | VF0525 | Adherence                    |
| ORS-AF04-42     | 9   | Capsule       | VF0361 | Immune modulation            |
| ORS-AF04-42     | 9   | CBPs          | VF0145 | Adherence                    |
| ORS-AF04-54     | 107 | PI-2          | VF0530 | Adherence                    |
| ORS-AF04-54     | 107 | Capsule       | VF0144 | Immune modulation            |
| ORS-AF04-54     | 107 | Neuraminidase | VF0148 | Exoenzyme                    |
| ORS-AF04-54     | 107 | PavB          | VF0524 | Adherence                    |
| ORS-AF04-59     | 107 | PI-2          | VF0530 | Adherence                    |
| ORS-AF04-59     | 107 | Capsule       | VF0144 | Immune modulation            |
| ORS-AF04-59     | 107 | Neuraminidase | VF0148 | Exoenzyme                    |
| ORS-AF04-59     | 107 | PavB          | VF0524 | Adherence                    |
| ORS-AF05-07     | 8   | Capsule       | VF0144 | Immune modulation            |
| ORS-AF05-07     | 8   | Capsule       | VF0361 | Immune modulation            |
| ORS-AF05-07     | 8   | Neuraminidase | VF0148 | Exoenzyme                    |
| ORS-AF05-07     | 8   | IgA1 protease | VF0147 | Immune modulation            |
| ORS-AF05-07     | 8   | PfbA          | VF0525 | Adherence                    |
| ORS-AF05-11     | 9   | Capsule       | VF0144 | Immune modulation            |
| ORS-AF05-11     | 9   | PfbA          | VF0525 | Adherence                    |
| ORS-AF05-11     | 9   | CBPs          | VF0145 | Adherence                    |
| ORS-AF05-11     | 9   | Capsule       | VF0361 | Immune modulation            |
| ORS-AF05-19     | 49  | IgA1 protease | VF0147 | Immune modulation            |
| ORS-AF05-19     | 49  | ClpP          | VF0074 | Stress survival              |
| ORS-AF05-19     | 49  | PsaA          | VF0151 | Nutritional/Metabolic factor |
| ORS-AF05-220    | 10  | Capsule       | VF0144 | Immune modulation            |
| ORS-AF05-30     | 43  | ClpP          | VF0074 | Stress survival              |
| ORS-AF06-121    | 86  | Capsule       | VF0144 | Immune modulation            |
| ORS-AF06-121    | 86  | Neuraminidase | VF0148 | Exoenzyme                    |
| ORS-AF06-121    | 86  | PavB          | VF0524 | Adherence                    |
| ORS-AF06-159    | 5   | PfbA          | VF0525 | Adherence                    |
| ORS-AF06-69     | 61  | SLS           | VF0251 | Exotoxin                     |
| ORS-AF08-10     | 107 | Capsule       | VF0144 | Immune modulation            |
| ORS-AF08-10     | 107 | Neuraminidase | VF0148 | Exoenzyme                    |
| ORS-AF08-10     | 107 | PavB          | VF0524 | Adherence                    |
| ORS-AF08-10     | 107 | PI-2          | VF0530 | Adherence                    |
| ORS-AF08-11     | 127 | PavB          | VF0524 | Adherence                    |
| ORS-AF08-11     | 127 | PfbA          | VF0525 | Adherence                    |
| ORS-AF08-12-MRS | 157 | Capsule       | VF0144 | Immune modulation            |
| ORS-AF08-12-MRS | 157 | Neuraminidase | VF0148 | Exoenzyme                    |
| ORS-AF08-12-MRS | 157 | PavB          | VF0524 | Adherence                    |
| ORS-AF08-13B    | 106 | GroEL         | VF0594 | Adherence                    |
| ORS-AF08-13B    | 106 | ClpP          | VF0074 | Stress survival              |
| ORS-AF08-13     | 107 | Capsule       | VF0144 | Immune modulation            |
| ORS-AF08-13     | 107 | PI-2          | VF0530 | Adherence                    |
| ORS-AF08-13     | 107 | PavB          | VF0524 | Adherence                    |
| ORS-AF08-14-MRS | 106 | GroEL         | VF0594 | Adherence                    |
| ORS-AF08-14-MRS | 106 | ClpP          | VF0074 | Stress survival              |
| ORS-AF08-14     | 107 | Capsule       | VF0144 | Immune modulation            |
| ORS-AF08-14     | 107 | PavB          | VF0524 | Adherence                    |
| ORS-AF08-14     | 107 | PI-2          | VF0530 | Adherence                    |
| ORS-AF08-15     | 4   | PavB          | VF0524 | Adherence                    |
| ORS-AF08-16-MRS | 176 | Neuraminidase | VF0148 | Exoenzyme                    |
| ORS-AF08-16-MRS | 176 | PavB          | VF0524 | Adherence                    |
| ORS-AF08-17-MRS | 157 | Capsule       | VF0144 | Immune modulation            |
| ORS-AF08-17-MRS | 157 | Neuraminidase | VF0148 | Exoenzyme                    |
| ORS-AF08-17-MRS | 157 | PavB          | VF0524 | Adherence                    |
| ORS-AF08-17     | 107 | Capsule       | VF0144 | Immune modulation            |
| ORS-AF08-17     | 107 | PavB          | VF0524 | Adherence                    |
| ORS-AF08-17     | 107 | CBPs          | VF0145 | Adherence                    |
| ORS-AF08-17     | 107 | PI-2          | VF0530 | Adherence                    |
| ORS-AF08-18     | 46  | Capsule       | VF0144 | Immune modulation            |
| ORS-AF08-19     | 107 | Capsule       | VF0144 | Immune modulation            |
| ORS-AF08-19     | 107 | PavB          | VF0524 | Adherence                    |
| ORS-AF08-19     | 107 | PI-2          | VF0530 | Adherence                    |
| ORS-AF08-19     | 107 | PavB          | VF0524 | Adherence                    |
| ORS-AF08-1-MRS  | 120 | PavB          | VF0524 | Adherence                    |
| ORS-AF08-1      | 176 | Neuraminidase | VF0148 | Exoenzyme                    |
| ORS-AF08-20     | 170 | Capsule       | VF0144 | Immune modulation            |
| ORS-AF08-20     | 170 | CBPs          | VF0145 | Adherence                    |
| ORS-AF08-21     | 107 | Capsule       | VF0144 | Immune modulation            |
| ORS-AF08-21     | 107 | PavB          | VF0524 | Adherence                    |
| ORS-AF08-21     | 107 | PI-2          | VF0530 | Adherence                    |
| ORS-AF08-22     | 107 | PI-2          | VF0530 | Adherence                    |
| ORS-AF08-22     | 107 | Capsule       | VF0144 | Immune modulation            |
| ORS-AF08-22     | 107 | PavB          | VF0524 | Adherence                    |
| ORS-AF08-23     | 176 | Neuraminidase | VF0148 | Exoenzyme                    |
| ORS-AF08-24     | 107 | Capsule       | VF0144 | Immune modulation            |
| ORS-AF08-24     | 107 | PavB          | VF0524 | Adherence                    |
| ORS-AF08-24     | 107 | PI-2          | VF0530 | Adherence                    |
| ORS-AF08-27-MRS | 106 | ClpP          | VF0074 | Stress survival              |
| ORS-AF08-27-MRS | 106 | GroEL         | VF0594 | Adherence                    |
| ORS-AF08-2-MRS  | 4   | PavB          | VF0524 | Adherence                    |
| ORS-AF08-3-MRS  | 77  | ClpP          | VF0074 | Stress survival              |
| ORS-AF08-3-MRS  | 77  | GroEL         | VF0594 | Adherence                    |
| ORS-AF08-4-MRS  | 107 | Capsule       | VF0144 | Immune modulation            |
| ORS-AF08-4-MRS  | 107 | PI-2          | VF0530 | Adherence                    |

|                  |     |                |        |                                             |
|------------------|-----|----------------|--------|---------------------------------------------|
| ORS-AF08-4-MRS   | 107 | PavB           | VF0524 | Adherence                                   |
| ORS-AF08-8-MRS   | 170 | Capsule        | VF0144 | Immune modulation                           |
| ORS-AF08-8-MRS   | 170 | CBPs           | VF0145 | Adherence                                   |
| ORS-AF08-8-MRS   | 170 | PfbA           | VF0525 | Adherence                                   |
| ORS-AF08-8       | 154 | PavB           | VF0524 | Adherence                                   |
| ORS-AF10-10-BH   | 194 | Capsule        | VF0144 | Immune modulation                           |
| ORS-AF10-10-BH   | 194 | PfbA           | VF0525 | Adherence                                   |
| ORS-AF10-10-BH   | 194 | Neuraminidase  | VF0148 | Exoenzyme                                   |
| ORS-AF10-10-BH   | 194 | Capsule        | VF0361 | Immune modulation                           |
| ORS-AF10-11-BH   | 194 | Capsule        | VF0144 | Immune modulation                           |
| ORS-AF10-11-BH   | 194 | PfbA           | VF0525 | Adherence                                   |
| ORS-AF10-11-BH   | 194 | Neuraminidase  | VF0148 | Exoenzyme                                   |
| ORS-AF10-11-BH   | 194 | Capsule        | VF0361 | Immune modulation                           |
| ORS-AF10-12-BH   | 95  | ClpP           | VF0074 | Stress survival                             |
| ORS-AF10-12-BH   | 95  | GroEL          | VF0594 | Adherence                                   |
| ORS-AF10-13-BH   | 157 | Capsule        | VF0144 | Immune modulation                           |
| ORS-AF10-13-BH   | 157 | Neuraminidase  | VF0148 | Exoenzyme                                   |
| ORS-AF10-14-BH   | 95  | ClpP           | VF0074 | Stress survival                             |
| ORS-AF10-14-BH   | 95  | GroEL          | VF0594 | Adherence                                   |
| ORS-AF10-17-O-BH | 15  | Polar flagella | VF0473 | Motility                                    |
| ORS-AF10-17-O-BH | 15  | Capsule        | VF0079 | Immune modulation                           |
| ORS-AF10-17-O-BH | 15  | MntABC         | VF0455 | Stress survival                             |
| ORS-AF10-17-O-BH | 15  | HmbR           | VF0048 | Nutritional/Metabolic factor                |
| ORS-AF10-17-O-BH | 15  | MtrCDE         | VF0451 | ntimicrobial activity/Competitive advantage |
| ORS-AF10-17-O-BH | 15  | Type IV pili   | VF0075 | Adherence                                   |
| ORS-AF10-20-O-BH | 186 | Capsule        | VF0144 | Immune modulation                           |
| ORS-AF10-20-O-BH | 186 | PI-2           | VF0530 | Adherence                                   |
| ORS-AF10-20-O-BH | 186 | Neuraminidase  | VF0148 | Exoenzyme                                   |
| ORS-AF10-20-O-BH | 186 | PfbA           | VF0525 | Adherence                                   |
| ORS-AF10-20-O-BH | 186 | PavB           | VF0524 | Adherence                                   |
| ORS-AF10-22-BH   | 186 | PI-2           | VF0530 | Adherence                                   |
| ORS-AF10-22-BH   | 186 | Capsule        | VF0144 | Immune modulation                           |
| ORS-AF10-22-BH   | 186 | Neuraminidase  | VF0148 | Exoenzyme                                   |
| ORS-AF10-22-BH   | 186 | PfbA           | VF0525 | Adherence                                   |
| ORS-AF10-22-BH   | 186 | PavB           | VF0524 | Adherence                                   |
| ORS-AF10-24-BH   | 195 | GroEL          | VF0594 | Adherence                                   |
| ORS-AF10-24-BH   | 195 | ClpP           | VF0074 | Stress survival                             |
| ORS-AF10-24-O-BH | 15  | Polar flagella | VF0473 | Motility                                    |
| ORS-AF10-24-O-BH | 15  | Capsule        | VF0079 | Immune modulation                           |
| ORS-AF10-24-O-BH | 15  | MntABC         | VF0455 | Stress survival                             |
| ORS-AF10-24-O-BH | 15  | HmbR           | VF0048 | Nutritional/Metabolic factor                |
| ORS-AF10-24-O-BH | 15  | MtrCDE         | VF0451 | ntimicrobial activity/Competitive advantage |
| ORS-AF10-24-O-BH | 15  | Type IV pili   | VF0075 | Adherence                                   |
| ORS-AF10-3-BH    | 184 | Capsule        | VF0144 | Immune modulation                           |
| ORS-AF10-3-BH    | 184 | PfbA           | VF0525 | Adherence                                   |
| ORS-AF10-5-BH    | 157 | Capsule        | VF0144 | Immune modulation                           |
| ORS-AF10-5-BH    | 157 | Neuraminidase  | VF0148 | Exoenzyme                                   |
| ORS-AF10-5-BH    | 157 | PfbA           | VF0525 | Adherence                                   |
| ORS-AF10-6-O-BH  | 15  | Capsule        | VF0079 | Immune modulation                           |
| ORS-AF10-6-O-BH  | 15  | Polar flagella | VF0473 | Motility                                    |
| ORS-AF10-6-O-BH  | 15  | MntABC         | VF0455 | Stress survival                             |
| ORS-AF10-6-O-BH  | 15  | HmbR           | VF0048 | Nutritional/Metabolic factor                |
| ORS-AF10-6-O-BH  | 15  | MtrCDE         | VF0451 | ntimicrobial activity/Competitive advantage |
| ORS-AF10-6-O-BH  | 15  | Type IV pili   | VF0075 | Adherence                                   |
| ORS-AF10-7-BH    | 107 | Capsule        | VF0144 | Immune modulation                           |
| ORS-AF10-7-BH    | 107 | PI-2           | VF0530 | Adherence                                   |
| ORS-AF10-7-BH    | 107 | PfbA           | VF0525 | Adherence                                   |
| ORS-AF10-7-BH    | 107 | Neuraminidase  | VF0148 | Exoenzyme                                   |
| ORS-AF10-7-BH    | 107 | PavB           | VF0524 | Adherence                                   |
| ORS-AF10-8-BH    | 157 | Capsule        | VF0144 | Immune modulation                           |
| ORS-AF10-8-BH    | 157 | Neuraminidase  | VF0148 | Exoenzyme                                   |
| ORS-AF10-8-BH    | 157 | PfbA           | VF0525 | Adherence                                   |
| ORS-AF10-9-BH    | 170 | Capsule        | VF0144 | Immune modulation                           |
| ORS-AF10-9-BH    | 170 | CBPs           | VF0145 | Adherence                                   |
| ORS-AF10-9-BH    | 170 | Capsule        | VF0361 | Immune modulation                           |
| ORS-AF10-9-BH    | 170 | PfbA           | VF0525 | Adherence                                   |
| ORS-AF10-C12     | 192 | CBPs           | VF0145 | Adherence                                   |
| ORS-AF10-C13     | 192 | CBPs           | VF0145 | Adherence                                   |
| ORS-AF10-C13     | 192 | PavB           | VF0524 | Adherence                                   |
| ORS-AF10-C15     | 193 | Capsule        | VF0144 | Immune modulation                           |
| ORS-AF10-C19     | 194 | PfbA           | VF0525 | Adherence                                   |
| ORS-AF10-C19     | 194 | Neuraminidase  | VF0148 | Exoenzyme                                   |
| ORS-AF10-C19     | 194 | Capsule        | VF0144 | Immune modulation                           |
| ORS-AF10-C19     | 194 | Capsule        | VF0361 | Immune modulation                           |
| ORS-AF10-C20     | 194 | Capsule        | VF0144 | Immune modulation                           |
| ORS-AF10-C20     | 194 | PfbA           | VF0525 | Adherence                                   |
| ORS-AF10-C20     | 194 | Neuraminidase  | VF0148 | Exoenzyme                                   |
| ORS-AF10-C20     | 194 | Capsule        | VF0361 | Immune modulation                           |
| ORS-AF10-C8      | 188 | Capsule        | VF0144 | Immune modulation                           |
| ORS-AF10-C8      | 188 | PfbA           | VF0525 | Adherence                                   |
| ORS-AF10-C8      | 188 | Neuraminidase  | VF0148 | Exoenzyme                                   |
| ORS-AF10-C8      | 188 | PavB           | VF0524 | Adherence                                   |
| ORS-AM01-01O     | 15  | MtrCDE         | VF0451 | ntimicrobial activity/Competitive advantage |
| ORS-AM01-01O     | 15  | MntABC         | VF0455 | Stress survival                             |
| ORS-AM01-02BB    | 135 | Neuraminidase  | VF0148 | Exoenzyme                                   |
| ORS-AM01-02BB    | 135 | PavB           | VF0524 | Adherence                                   |
| ORS-AM01-04BBO   | 136 | MntABC         | VF0455 | Stress survival                             |
| ORS-AM01-04BBO   | 136 | Type IV pili   | VF0075 | Adherence                                   |
| ORS-AM01-04BBO   | 136 | Polar flagella | VF0473 | Motility                                    |
| ORS-AM01-04MB    | 46  | Capsule        | VF0144 | Immune modulation                           |
| ORS-AM01-13TBO   | 15  | Polar flagella | VF0473 | Motility                                    |
| ORS-AM01-13TBO   | 15  | Capsule        | VF0079 | Immune modulation                           |
| ORS-AM01-13TBO   | 15  | MtrCDE         | VF0451 | ntimicrobial activity/Competitive advantage |
| ORS-AM01-13TBO   | 15  | MntABC         | VF0455 | Stress survival                             |
| ORS-AM01-13TBO   | 15  | HmbR           | VF0048 | Nutritional/Metabolic factor                |
| ORS-AM04-111     | 25  | GroEL          | VF0594 | Adherence                                   |
| ORS-AM04-111     | 25  | ClpP           | VF0074 | Stress survival                             |
| ORS-AM04-35      | 4   | PavB           | VF0524 | Adherence                                   |
| ORS-AM04-85      | 23  | ClpP           | VF0074 | Stress survival                             |
| ORS-AM04-85      | 23  | GroEL          | VF0594 | Adherence                                   |
| ORS-AM04-86      | 3   | PavB           | VF0524 | Adherence                                   |
| ORS-AM05-122     | 31  | Capsule        | VF0144 | Immune modulation                           |
| ORS-AM05-128     | 46  | Capsule        | VF0144 | Immune modulation                           |
| ORS-AM05-133     | 100 | Neuraminidase  | VF0148 | Exoenzyme                                   |
| ORS-AM05-138     | 11  | Capsule        | VF0144 | Immune modulation                           |
| ORS-AM05-138     | 11  | Neuraminidase  | VF0148 | Exoenzyme                                   |
| ORS-AM05-138     | 11  | PavB           | VF0524 | Adherence                                   |
| ORS-AM05-141     | 11  | Capsule        | VF0144 | Immune modulation                           |
| ORS-AM05-141     | 11  | Neuraminidase  | VF0148 | Exoenzyme                                   |
| ORS-AM05-141     | 11  | PavB           | VF0524 | Adherence                                   |
| ORS-AM05-177     | 46  | Capsule        | VF0144 | Immune modulation                           |
| ORS-AM05-183     | 11  | Capsule        | VF0144 | Immune modulation                           |
| ORS-AM05-183     | 11  | Neuraminidase  | VF0148 | Exoenzyme                                   |
| ORS-AM05-183     | 11  | PavB           | VF0524 | Adherence                                   |
| ORS-AM05-194     | 11  | Capsule        | VF0144 | Immune modulation                           |
| ORS-AM05-194     | 11  | Neuraminidase  | VF0148 | Exoenzyme                                   |
| ORS-AM05-194     | 11  | PavB           | VF0524 | Adherence                                   |
| ORS-AM05-197     | 85  | Capsule        | VF0144 | Immune modulation                           |
| ORS-AM05-197     | 85  | CBPs           | VF0145 | Adherence                                   |
| ORS-AM05-197     | 85  | PfbA           | VF0525 | Adherence                                   |
| ORS-AM05-197     | 85  | PavB           | VF0524 | Adherence                                   |

|                    |     |                |        |                                             |
|--------------------|-----|----------------|--------|---------------------------------------------|
| ORS-AM05-325       | 15  | Polar flagella | VF0473 | Motility                                    |
| ORS-AM05-325       | 15  | Type IV pili   | VF0075 | Adherence                                   |
| ORS-AM05-325       | 15  | MtrCDE         | VF0451 | ntimicrobial activity/Competitive advantage |
| ORS-AM05-325       | 15  | MntABC         | VF0455 | Stress survival                             |
| ORS-AM05-334       | 64  | MntABC         | VF0455 | Stress survival                             |
| ORS-AM05-334       | 64  | Capsule        | VF0079 | Immune modulation                           |
| ORS-AM05-336       | 99  | ClpP           | VF0074 | Stress survival                             |
| ORS-AM05-336       | 99  | ClpC           | VF0072 | Stress survival                             |
| ORS-AM05-342       | 99  | ClpC           | VF0072 | Stress survival                             |
| ORS-AM05-342       | 99  | ClpP           | VF0074 | Stress survival                             |
| ORS-AM05-365       | 16  | PavB           | VF0524 | Adherence                                   |
| ORS-AM05-381       | 82  | Capsule        | VF0144 | Immune modulation                           |
| ORS-AM05-471       | 148 | ClpP           | VF0074 | Stress survival                             |
| ORS-AM05-471       | 148 | GroEL          | VF0594 | Adherence                                   |
| ORS-AM05-478       | 16  | PavB           | VF0524 | Adherence                                   |
| ORS-AM05-481       | 101 | Capsule        | VF0144 | Immune modulation                           |
| ORS-AM05-481       | 101 | PfbA           | VF0525 | Adherence                                   |
| ORS-AM05-481       | 101 | CBPs           | VF0145 | Adherence                                   |
| ORS-AM05-481       | 101 | Capsule        | VF0361 | Immune modulation                           |
| ORS-AM05-481       | 101 | PavB           | VF0524 | Adherence                                   |
| ORS-AM05-491       | 35  | Capsule        | VF0144 | Immune modulation                           |
| ORS-AM05-491       | 35  | Neuraminidase  | VF0148 | Exoenzyme                                   |
| ORS-AM05-491       | 35  | PavB           | VF0524 | Adherence                                   |
| ORS-AM05-495       | 46  | Capsule        | VF0144 | Immune modulation                           |
| ORS-AM08-171       | 18  | GroEL          | VF0594 | Adherence                                   |
| ORS-AM08-171       | 18  | ClpP           | VF0074 | Stress survival                             |
| ORS-AM08-24        | 25  | GroEL          | VF0594 | Adherence                                   |
| ORS-AM08-24        | 25  | ClpP           | VF0074 | Stress survival                             |
| ORS-AM08-34        | 106 | ClpP           | VF0074 | Stress survival                             |
| ORS-AM08-34        | 106 | GroEL          | VF0594 | Adherence                                   |
| ORS-AM08-44        | 18  | ClpP           | VF0074 | Stress survival                             |
| ORS-AM08-44        | 18  | GroEL          | VF0594 | Adherence                                   |
| ORS-AM08-46        | 106 | ClpP           | VF0074 | Stress survival                             |
| ORS-AM08-46        | 106 | GroEL          | VF0594 | Adherence                                   |
| ORS-AM08-48        | 106 | GroEL          | VF0594 | Adherence                                   |
| ORS-AM08-48        | 106 | ClpP           | VF0074 | Stress survival                             |
| ORS-AM08-51        | 18  | ClpP           | VF0074 | Stress survival                             |
| ORS-AM08-51        | 18  | GroEL          | VF0594 | Adherence                                   |
| ORS-AM08-63        | 115 | Neuraminidase  | VF0148 | Exoenzyme                                   |
| ORS-AM08-69        | 106 | ClpP           | VF0074 | Stress survival                             |
| ORS-AM08-69        | 106 | GroEL          | VF0594 | Adherence                                   |
| ORS-AM09-10-104    | 115 | PavB           | VF0524 | Adherence                                   |
| ORS-AM09-10-O-104  | 113 | PavB           | VF0524 | Adherence                                   |
| ORS-AM09-10-O-BH   | 157 | Capsule        | VF0144 | Immune modulation                           |
| ORS-AM09-10-O-BH   | 157 | Neuraminidase  | VF0148 | Exoenzyme                                   |
| ORS-AM09-10-O-BH   | 157 | PfbA           | VF0525 | Adherence                                   |
| ORS-AM09-1-104     | 158 | PfbA           | VF0525 | Adherence                                   |
| ORS-AM09-1-104     | 158 | Neuraminidase  | VF0148 | Exoenzyme                                   |
| ORS-AM09-11-O-104  | 107 | Capsule        | VF0144 | Immune modulation                           |
| ORS-AM09-11-O-104  | 107 | PI-2           | VF0530 | Adherence                                   |
| ORS-AM09-11-O-104  | 107 | PavB           | VF0524 | Adherence                                   |
| ORS-AM09-1-2-O-BH  | 156 | Capsule        | VF0144 | Immune modulation                           |
| ORS-AM09-1-2-O-BH  | 156 | PavB           | VF0524 | Adherence                                   |
| ORS-AM09-13-O-104  | 172 | Neuraminidase  | VF0148 | Exoenzyme                                   |
| ORS-AM09-14-O-104  | 172 | Neuraminidase  | VF0148 | Exoenzyme                                   |
| ORS-AM09-16-104    | 163 | PfbA           | VF0525 | Adherence                                   |
| ORS-AM09-16-104    | 163 | Neuraminidase  | VF0148 | Exoenzyme                                   |
| ORS-AM09-16-104    | 163 | CBPs           | VF0145 | Adherence                                   |
| ORS-AM09-16-104    | 163 | Capsule        | VF0361 | Immune modulation                           |
| ORS-AM09-16-104    | 163 | Capsule        | VF0144 | Immune modulation                           |
| ORS-AM09-16-104    | 163 | PavB           | VF0524 | Adherence                                   |
| ORS-AM09-16-BH     | 163 | Neuraminidase  | VF0148 | Exoenzyme                                   |
| ORS-AM09-16-BH     | 163 | PfbA           | VF0525 | Adherence                                   |
| ORS-AM09-16-BH     | 163 | CBPs           | VF0145 | Adherence                                   |
| ORS-AM09-16-BH     | 163 | Capsule        | VF0361 | Immune modulation                           |
| ORS-AM09-16-BH     | 163 | Capsule        | VF0144 | Immune modulation                           |
| ORS-AM09-16-O-BH   | 136 | MntABC         | VF0455 | Stress survival                             |
| ORS-AM09-16-O-BH   | 136 | Type IV pili   | VF0075 | Adherence                                   |
| ORS-AM09-16-O-BH   | 136 | Polar flagella | VF0473 | Motility                                    |
| ORS-AM09-16-O-BH   | 136 | MtrCDE         | VF0451 | ntimicrobial activity/Competitive advantage |
| ORS-AM09-17-O-BH   | 157 | Capsule        | VF0144 | Immune modulation                           |
| ORS-AM09-17-O-BH   | 157 | Neuraminidase  | VF0148 | Exoenzyme                                   |
| ORS-AM09-17-O-BH   | 157 | PfbA           | VF0525 | Adherence                                   |
| ORS-AM09-17-O-BH   | 157 | Neuraminidase  | VF0148 | Exoenzyme                                   |
| ORS-AM09-18-104    | 159 | Neuraminidase  | VF0148 | Exoenzyme                                   |
| ORS-AM09-19-104    | 157 | Capsule        | VF0144 | Immune modulation                           |
| ORS-AM09-19-104    | 157 | PfbA           | VF0525 | Adherence                                   |
| ORS-AM09-19-104    | 157 | Neuraminidase  | VF0148 | Exoenzyme                                   |
| ORS-AM09-19-BH     | 17  | ClpP           | VF0074 | Stress survival                             |
| ORS-AM09-19-O-BH   | 158 | PfbA           | VF0525 | Adherence                                   |
| ORS-AM09-19-O-BH   | 158 | Neuraminidase  | VF0148 | Exoenzyme                                   |
| ORS-AM09-1-O-104   | 86  | Neuraminidase  | VF0148 | Exoenzyme                                   |
| ORS-AM09-1-O-104   | 86  | Capsule        | VF0144 | Immune modulation                           |
| ORS-AM09-20-O-BH   | 36  | PavB           | VF0524 | Adherence                                   |
| ORS-AM09-2-104     | 165 | ClpP           | VF0074 | Stress survival                             |
| ORS-AM09-22-104    | 85  | Capsule        | VF0144 | Immune modulation                           |
| ORS-AM09-22-104    | 85  | CBPs           | VF0145 | Adherence                                   |
| ORS-AM09-22-104    | 85  | Neuraminidase  | VF0148 | Exoenzyme                                   |
| ORS-AM09-22-104    | 85  | PfbA           | VF0525 | Adherence                                   |
| ORS-AM09-22-O-BH   | 73  | Neuraminidase  | VF0148 | Exoenzyme                                   |
| ORS-AM09-22-O-BH   | 73  | PavB           | VF0524 | Adherence                                   |
| ORS-AM09-24-O-BH   | 159 | Neuraminidase  | VF0148 | Exoenzyme                                   |
| ORS-AM09-24-O-BH   | 159 | PavB           | VF0524 | Adherence                                   |
| ORS-AM09-27-O-104  | 107 | PI-2           | VF0530 | Adherence                                   |
| ORS-AM09-27-O-104  | 107 | Capsule        | VF0144 | Immune modulation                           |
| ORS-AM09-27-O-104  | 107 | PavB           | VF0524 | Adherence                                   |
| ORS-AM09-2-O-104   | 174 | Capsule        | VF0144 | Immune modulation                           |
| ORS-AM09-2-O-104   | 174 | Neuraminidase  | VF0148 | Exoenzyme                                   |
| ORS-AM09-3-104     | 181 | ClpP           | VF0074 | Stress survival                             |
| ORS-AM09-31-1-O-BH | 15  | Capsule        | VF0079 | Immune modulation                           |
| ORS-AM09-31-1-O-BH | 15  | Polar flagella | VF0473 | Motility                                    |
| ORS-AM09-31-1-O-BH | 15  | MntABC         | VF0455 | Stress survival                             |
| ORS-AM09-31-2-O-BH | 15  | Capsule        | VF0079 | Immune modulation                           |
| ORS-AM09-31-2-O-BH | 15  | Polar flagella | VF0473 | Motility                                    |
| ORS-AM09-31-2-O-BH | 15  | MntABC         | VF0455 | Stress survival                             |
| ORS-AM09-32-BH     | 49  | ClpP           | VF0074 | Stress survival                             |
| ORS-AM09-32-BH     | 49  | PsaA           | VF0151 | Nutritional/Metabolic factor                |
| ORS-AM09-32-BH     | 49  | IgA1 protease  | VF0147 | Immune modulation                           |
| ORS-AM09-39-O-BH   | 159 | Neuraminidase  | VF0148 | Exoenzyme                                   |
| ORS-AM09-4-104     | 120 | PavB           | VF0524 | Adherence                                   |
| ORS-AM09-41-O-BH   | 15  | Capsule        | VF0079 | Immune modulation                           |
| ORS-AM09-41-O-BH   | 15  | Polar flagella | VF0473 | Motility                                    |
| ORS-AM09-41-O-BH   | 15  | MntABC         | VF0455 | Stress survival                             |
| ORS-AM09-43-O-BH   | 79  | Neuraminidase  | VF0148 | Exoenzyme                                   |
| ORS-AM09-43-O-BH   | 79  | Capsule        | VF0144 | Immune modulation                           |
| ORS-AM09-45-O-BH   | 161 | Capsule        | VF0144 | Immune modulation                           |
| ORS-AM09-45-O-BH   | 161 | CBPs           | VF0145 | Adherence                                   |
| ORS-AM09-4-O-104   | 107 | Capsule        | VF0144 | Immune modulation                           |
| ORS-AM09-4-O-104   | 107 | PI-2           | VF0530 | Adherence                                   |
| ORS-AM09-4-O-104   | 107 | PavB           | VF0524 | Adherence                                   |
| ORS-AM09-5-104     | 182 | PfbA           | VF0525 | Adherence                                   |
| ORS-AM09-5-104     | 182 | PavB           | VF0524 | Adherence                                   |

|                  |     |               |        |                                             |
|------------------|-----|---------------|--------|---------------------------------------------|
| ORS-AM09-5-104   | 182 | IgA1 protease | VF0147 | Immune modulation                           |
| ORS-AM09-5-104   | 182 | Capsule       | VF0144 | Immune modulation                           |
| ORS-AM09-5-104   | 182 | Capsule       | VF0361 | Immune modulation                           |
| ORS-AM09-5-BH    | 165 | ClpP          | VF0074 | Stress survival                             |
| ORS-AM09-5D1B    | 92  | ClpP          | VF0074 | Stress survival                             |
| ORS-AM09-5D2A    | 92  | ClpP          | VF0074 | Stress survival                             |
| ORS-AM09-7-BH    | 95  | ClpP          | VF0074 | Stress survival                             |
| ORS-AM09-7-BH    | 95  | GroEL         | VF0594 | Adherence                                   |
| ORS-AM09-7-O-104 | 63  | PavB          | VF0524 | Adherence                                   |
| ORS-AM09-8-O-BH  | 157 | Capsule       | VF0144 | Immune modulation                           |
| ORS-AM09-8-O-BH  | 157 | Neuraminidase | VF0148 | Exoenzyme                                   |
| ORS-AM09-8-O-BH  | 157 | PfbA          | VF0525 | Adherence                                   |
| ORS-AM09-9-104   | 157 | Capsule       | VF0144 | Immune modulation                           |
| ORS-AM09-9-104   | 157 | PfbA          | VF0525 | Adherence                                   |
| ORS-AM09-9-104   | 157 | Neuraminidase | VF0148 | Exoenzyme                                   |
| ORS-AM09-9-O-104 | 107 | Capsule       | VF0144 | Immune modulation                           |
| ORS-AM09-9-O-104 | 107 | PI-2          | VF0530 | Adherence                                   |
| ORS-AM09-9-O-104 | 107 | PavB          | VF0524 | Adherence                                   |
| ORS-AM09-9-O-BH  | 157 | Capsule       | VF0144 | Immune modulation                           |
| ORS-AM09-9-O-BH  | 157 | Neuraminidase | VF0148 | Exoenzyme                                   |
| ORS-AM09-9-O-BH  | 157 | PfbA          | VF0525 | Adherence                                   |
| ORS-TM06-05      | 61  | Capsule       | VF0144 | Immune modulation                           |
| ORS-TM06-06      | 63  | PavB          | VF0524 | Adherence                                   |
| ORS-TM06-07      | 104 | SpaP          | VF0526 | Adherence                                   |
| ORS-TM06-100     | 84  | ClpP          | VF0074 | Stress survival                             |
| ORS-TM06-100     | 84  | IgA1 protease | VF0147 | Immune modulation                           |
| ORS-TM06-100     | 84  | PsaA          | VF0151 | Nutritional/Metabolic factor                |
| ORS-TM06-104     | 37  | ClpP          | VF0074 | Stress survival                             |
| ORS-TM06-105     | 102 | Neuraminidase | VF0148 | Exoenzyme                                   |
| ORS-TM06-105     | 102 | Capsule       | VF0144 | Immune modulation                           |
| ORS-TM06-106     | 103 | ClpP          | VF0074 | Stress survival                             |
| ORS-TM06-106     | 103 | GroEL         | VF0594 | Adherence                                   |
| ORS-TM06-109     | 57  | ClpP          | VF0074 | Stress survival                             |
| ORS-TM06-110     | 84  | ClpP          | VF0074 | Stress survival                             |
| ORS-TM06-110     | 84  | IgA1 protease | VF0147 | Immune modulation                           |
| ORS-TM06-110     | 84  | PsaA          | VF0151 | Nutritional/Metabolic factor                |
| ORS-TM06-111     | 61  | Capsule       | VF0144 | Immune modulation                           |
| ORS-TM06-114     | 84  | PsaA          | VF0151 | Nutritional/Metabolic factor                |
| ORS-TM06-114     | 84  | ClpP          | VF0074 | Stress survival                             |
| ORS-TM06-114     | 84  | IgA1 protease | VF0147 | Immune modulation                           |
| ORS-TM06-118     | 61  | Capsule       | VF0144 | Immune modulation                           |
| ORS-TM06-134     | 23  | GroEL         | VF0594 | Adherence                                   |
| ORS-TM06-134     | 23  | ClpP          | VF0074 | Stress survival                             |
| ORS-TM06-134     | 23  | ClpP          | VF0074 | Stress survival                             |
| ORS-TM06-140     | 92  | ClpP          | VF0074 | Stress survival                             |
| ORS-TM06-15      | 56  | PavB          | VF0524 | Adherence                                   |
| ORS-TM06-215     | 19  | ClpP          | VF0074 | Stress survival                             |
| ORS-TM06-224     | 4   | PavB          | VF0524 | Adherence                                   |
| ORS-TM06-226     | 19  | ClpP          | VF0074 | Stress survival                             |
| ORS-TM06-235     | 92  | ClpP          | VF0074 | Stress survival                             |
| ORS-TM06-27      | 63  | PavB          | VF0524 | Adherence                                   |
| ORS-TM06-36      | 31  | Capsule       | VF0144 | Immune modulation                           |
| ORS-TM06-36      | 31  | PavB          | VF0524 | Adherence                                   |
| ORS-TM06-37      | 15  | Capsule       | VF0079 | Immune modulation                           |
| ORS-TM06-37      | 15  | MtrCDE        | VF0451 | ntimicrobial activity/Competitive advantage |
| ORS-TM06-37      | 15  | HmbR          | VF0048 | Nutritional/Metabolic factor                |
| ORS-TM06-37      | 15  | MntABC        | VF0455 | Stress survival                             |
| ORS-TM06-82      | 17  | ClpP          | VF0074 | Stress survival                             |
| ORS-TM06-83      | 18  | ClpP          | VF0074 | Stress survival                             |
| ORS-TM06-83      | 18  | GroEL         | VF0594 | Adherence                                   |
| ORS-TM06-89      | 36  | PavB          | VF0524 | Adherence                                   |
| ORS-TM06-89      | 36  | Capsule       | VF0144 | Immune modulation                           |
| ORS-TM06-90      | 55  | ClpP          | VF0074 | Stress survival                             |
| ORS-TM06-91      | 57  | ClpP          | VF0074 | Stress survival                             |
| ORS-TM06-93      | 18  | ClpP          | VF0074 | Stress survival                             |
| ORS-TM06-93      | 18  | GroEL         | VF0594 | Adherence                                   |
| ORS-TM06-94      | 57  | ClpP          | VF0074 | Stress survival                             |
| ORS-TM06-97      | 17  | ClpP          | VF0074 | Stress survival                             |
| ORS-TM06-99      | 23  | GroEL         | VF0594 | Adherence                                   |
| ORS-TM06-99      | 23  | ClpP          | VF0074 | Stress survival                             |
| ORS-TM07-02      | 21  | Ebp pili      | VF0538 | Adherence                                   |
| ORS-TM07-02      | 21  | EfaA          | VF0354 | Adherence                                   |
| ORS-TM07-02      | 21  | Capsule       | VF0361 | Immune modulation                           |
| ORS-TM07-02      | 21  | Hyaluronidase | VF0359 | Exoenzyme                                   |
| ORS-TM07-02      | 21  | ClpP          | VF0074 | Stress survival                             |
| ORS-TM07-03      | 23  | ClpP          | VF0074 | Stress survival                             |
| ORS-TM07-03      | 23  | GroEL         | VF0594 | Adherence                                   |
| ORS-TM07-11      | 21  | EfaA          | VF0354 | Adherence                                   |
| ORS-TM07-11      | 21  | Ebp pili      | VF0538 | Adherence                                   |
| ORS-TM07-11      | 21  | Capsule       | VF0361 | Immune modulation                           |
| ORS-TM07-11      | 21  | ClpP          | VF0074 | Stress survival                             |
| ORS-TM07-11      | 21  | Hyaluronidase | VF0359 | Exoenzyme                                   |
| ORS-TM07-215     | 24  | PavB          | VF0524 | Adherence                                   |
| ORS-TM07-219     | 85  | CBPs          | VF0145 | Adherence                                   |
| ORS-TM07-219     | 85  | PfbA          | VF0525 | Adherence                                   |
| ORS-TM07-219     | 85  | Capsule       | VF0144 | Immune modulation                           |
| ORS-TM07-225     | 85  | Capsule       | VF0144 | Immune modulation                           |
| ORS-TM07-225     | 85  | CBPs          | VF0145 | Adherence                                   |
| ORS-TM07-225     | 85  | PfbA          | VF0525 | Adherence                                   |
| ORS-TM07-227     | 143 | PI-2          | VF0530 | Adherence                                   |
| ORS-TM07-227     | 143 | Neuraminidase | VF0148 | Exoenzyme                                   |
| ORS-TM07-227     | 143 | PavB          | VF0524 | Adherence                                   |
| ORS-TM07-227     | 143 | Capsule       | VF0144 | Immune modulation                           |
| ORS-TM07-227     | 143 | Capsule       | VF0361 | Immune modulation                           |
| ORS-TM07-240     | 11  | PI-2          | VF0530 | Adherence                                   |
| ORS-TM07-240     | 11  | Capsule       | VF0144 | Immune modulation                           |
| ORS-TM07-240     | 11  | Neuraminidase | VF0148 | Exoenzyme                                   |
| ORS-TM07-240     | 11  | PavB          | VF0524 | Adherence                                   |
| ORS-TM07-255     | 123 | ClpP          | VF0074 | Stress survival                             |
| ORS-TM07-255     | 123 | PavB          | VF0524 | Adherence                                   |
| ORS-TM07-255     | 123 | PI-2          | VF0530 | Adherence                                   |
| ORS-TM07-269     | 11  | PI-2          | VF0530 | Adherence                                   |
| ORS-TM07-269     | 11  | Capsule       | VF0144 | Immune modulation                           |
| ORS-TM07-269     | 11  | Neuraminidase | VF0148 | Exoenzyme                                   |
| ORS-TM07-269     | 11  | PavB          | VF0524 | Adherence                                   |
| ORS-TM07-270     | 34  | ClpP          | VF0074 | Stress survival                             |
| ORS-TM07-270     | 34  | GroEL         | VF0594 | Adherence                                   |
| ORS-TM07-35      | 21  | Ebp pili      | VF0538 | Adherence                                   |
| ORS-TM07-35      | 21  | EfaA          | VF0354 | Adherence                                   |
| ORS-TM07-35      | 21  | Capsule       | VF0361 | Immune modulation                           |
| ORS-TM07-35      | 21  | Hyaluronidase | VF0359 | Exoenzyme                                   |
| ORS-TM07-35      | 21  | ClpP          | VF0074 | Stress survival                             |
| ORS-TM07-40      | 21  | Capsule       | VF0361 | Immune modulation                           |
| ORS-TM07-40      | 21  | EfaA          | VF0354 | Adherence                                   |
| ORS-TM07-40      | 21  | Ebp pili      | VF0538 | Adherence                                   |
| ORS-TM07-40      | 21  | Hyaluronidase | VF0359 | Exoenzyme                                   |
| ORS-TM07-40      | 21  | ClpP          | VF0074 | Stress survival                             |
| ORS-TM07-54      | 21  | Ebp pili      | VF0538 | Adherence                                   |
| ORS-TM07-54      | 21  | EfaA          | VF0354 | Adherence                                   |
| ORS-TM07-54      | 21  | Capsule       | VF0361 | Immune modulation                           |
| ORS-TM07-54      | 21  | ClpP          | VF0074 | Stress survival                             |
| ORS-TM07-54      | 21  | Hyaluronidase | VF0359 | Exoenzyme                                   |

|                   |     |                |        |                                             |
|-------------------|-----|----------------|--------|---------------------------------------------|
| ORS-TM07-73       | 21  | Capsule        | VF0361 | Immune modulation                           |
| ORS-TM07-73       | 21  | EfaA           | VF0354 | Adherence                                   |
| ORS-TM07-73       | 21  | Ebp pili       | VF0538 | Adherence                                   |
| ORS-TM07-73       | 21  | ClpP           | VF0074 | Stress survival                             |
| ORS-TM07-73       | 21  | Hyaluronidase  | VF0359 | Exoenzyme                                   |
| ORS-TM07-76       | 55  | ClpP           | VF0074 | Stress survival                             |
| ORS-TM07-77       | 55  | ClpP           | VF0074 | Stress survival                             |
| ORS-TM07-79       | 55  | ClpP           | VF0074 | Stress survival                             |
| ORT-AF03-04       | 70  | PavB           | VF0524 | Adherence                                   |
| ORT-AF03-215      | 126 | Autolysin      | VF0143 | Exoenzyme                                   |
| ORT-AF03-215      | 126 | PavB           | VF0524 | Adherence                                   |
| ORT-AF03-68       | 17  | ClpP           | VF0074 | Stress survival                             |
| ORT-AF03-76       | 94  | ClpP           | VF0074 | Stress survival                             |
| ORT-AF03-76       | 94  | IgA1 protease  | VF0147 | Immune modulation                           |
| ORT-AF03-76       | 94  | PsaA           | VF0151 | Nutritional/Metabolic factor                |
| ORT-AF04-16       | 110 | Neuraminidase  | VF0148 | Exoenzyme                                   |
| ORT-AF04-215      | 43  | ClpP           | VF0074 | Stress survival                             |
| ORT-AF04-246      | 7   | Capsule        | VF0144 | Immune modulation                           |
| ORT-AF04-246      | 7   | PfbA           | VF0525 | Adherence                                   |
| ORT-AF04-246      | 7   | Neuraminidase  | VF0148 | Exoenzyme                                   |
| ORT-AF04-247      | 127 | Autolysin      | VF0143 | Exoenzyme                                   |
| ORT-AF04-247      | 127 | Neuraminidase  | VF0148 | Exoenzyme                                   |
| ORT-AF04-248      | 95  | GroEL          | VF0594 | Adherence                                   |
| ORT-AF04-248      | 95  | ClpP           | VF0074 | Stress survival                             |
| ORT-AF05-109      | 21  | Ebp pili       | VF0538 | Adherence                                   |
| ORT-AF05-109      | 21  | Capsule        | VF0361 | Immune modulation                           |
| ORT-AF05-109      | 21  | Hyaluronidase  | VF0359 | Exoenzyme                                   |
| ORT-AF05-109      | 21  | EfaA           | VF0354 | Adherence                                   |
| ORT-AF05-109      | 21  | ClpP           | VF0074 | Stress survival                             |
| ORT-AF05-113      | 95  | ClpP           | VF0074 | Stress survival                             |
| ORT-AF05-113      | 95  | GroEL          | VF0594 | Adherence                                   |
| ORT-AF05-117      | 21  | Ebp pili       | VF0538 | Adherence                                   |
| ORT-AF05-117      | 21  | Capsule        | VF0361 | Immune modulation                           |
| ORT-AF05-117      | 21  | Hyaluronidase  | VF0359 | Exoenzyme                                   |
| ORT-AF05-117      | 21  | EfaA           | VF0354 | Adherence                                   |
| ORT-AF05-117      | 21  | ClpP           | VF0074 | Stress survival                             |
| ORT-AF05-121      | 95  | GroEL          | VF0594 | Adherence                                   |
| ORT-AF05-121      | 95  | ClpP           | VF0074 | Stress survival                             |
| ORT-AF05-123      | 21  | Capsule        | VF0361 | Immune modulation                           |
| ORT-AF05-123      | 21  | EfaA           | VF0354 | Adherence                                   |
| ORT-AF05-123      | 21  | Ebp pili       | VF0538 | Adherence                                   |
| ORT-AF05-123      | 21  | Hyaluronidase  | VF0359 | Exoenzyme                                   |
| ORT-AF05-123      | 21  | ClpP           | VF0074 | Stress survival                             |
| ORT-AF05-128      | 21  | Ebp pili       | VF0538 | Adherence                                   |
| ORT-AF05-128      | 21  | EfaA           | VF0354 | Adherence                                   |
| ORT-AF05-128      | 21  | Capsule        | VF0361 | Immune modulation                           |
| ORT-AF05-128      | 21  | Hyaluronidase  | VF0359 | Exoenzyme                                   |
| ORT-AF05-128      | 21  | ClpP           | VF0074 | Stress survival                             |
| ORT-AF06-16       | 73  | Autolysin      | VF0143 | Exoenzyme                                   |
| ORT-AF06-16       | 73  | Capsule        | VF0144 | Immune modulation                           |
| ORT-AF06-16       | 73  | Neuraminidase  | VF0148 | Exoenzyme                                   |
| ORT-AF06-16       | 73  | PavB           | VF0524 | Adherence                                   |
| ORT-AF06-30       | 5   | PfbA           | VF0525 | Adherence                                   |
| ORT-AF06-36       | 73  | Neuraminidase  | VF0148 | Exoenzyme                                   |
| ORT-AF06-36       | 73  | PavB           | VF0524 | Adherence                                   |
| ORT-AF08-10       | 185 | Capsule        | VF0144 | Immune modulation                           |
| ORT-AF08-11-MRS   | 178 | ClpP           | VF0074 | Stress survival                             |
| ORT-AF08-11       | 107 | Capsule        | VF0144 | Immune modulation                           |
| ORT-AF08-11       | 107 | PI-2           | VF0530 | Adherence                                   |
| ORT-AF08-11       | 107 | PavB           | VF0524 | Adherence                                   |
| ORT-AF08-12-O-MRS | 4   | PavB           | VF0524 | Adherence                                   |
| ORT-AF08-13       | 107 | PavB           | VF0524 | Adherence                                   |
| ORT-AF08-13       | 107 | PI-2           | VF0530 | Adherence                                   |
| ORT-AF08-13       | 107 | Capsule        | VF0144 | Immune modulation                           |
| ORT-AF08-14-O-MRS | 104 | SpaP           | VF0526 | Adherence                                   |
| ORT-AF08-14-O-MRS | 104 | PavB           | VF0524 | Adherence                                   |
| ORT-AF08-16       | 79  | Capsule        | VF0144 | Immune modulation                           |
| ORT-AF08-16       | 79  | PavB           | VF0524 | Adherence                                   |
| ORT-AF08-16       | 79  | Neuraminidase  | VF0148 | Exoenzyme                                   |
| ORT-AF08-17       | 185 | Capsule        | VF0144 | Immune modulation                           |
| ORT-AF08-17       | 185 | PavB           | VF0524 | Adherence                                   |
| ORT-AF08-19       | 104 | PavB           | VF0524 | Adherence                                   |
| ORT-AF08-21-O-MRS | 107 | Capsule        | VF0144 | Immune modulation                           |
| ORT-AF08-21-O-MRS | 107 | PI-2           | VF0530 | Adherence                                   |
| ORT-AF08-21-O-MRS | 107 | PavB           | VF0524 | Adherence                                   |
| ORT-AF08-28-MRS   | 46  | Capsule        | VF0144 | Immune modulation                           |
| ORT-AF08-32-MRS   | 46  | Capsule        | VF0144 | Immune modulation                           |
| ORT-AF08-34-MRS   | 107 | Capsule        | VF0144 | Immune modulation                           |
| ORT-AF08-34-MRS   | 107 | PavB           | VF0524 | Adherence                                   |
| ORT-AF08-34-MRS   | 107 | PI-2           | VF0530 | Adherence                                   |
| ORT-AF08-3        | 46  | Capsule        | VF0144 | Immune modulation                           |
| ORT-AF08-43-MRS   | 107 | Neuraminidase  | VF0148 | Exoenzyme                                   |
| ORT-AF08-43-MRS   | 107 | PI-2           | VF0530 | Adherence                                   |
| ORT-AF08-43-MRS   | 107 | Capsule        | VF0144 | Immune modulation                           |
| ORT-AF08-43-MRS   | 107 | PavB           | VF0524 | Adherence                                   |
| ORT-AF08-4        | 173 | Capsule        | VF0144 | Immune modulation                           |
| ORT-AF08-4        | 173 | Neuraminidase  | VF0148 | Exoenzyme                                   |
| ORT-AF08-5        | 176 | Neuraminidase  | VF0148 | Exoenzyme                                   |
| ORT-AF08-5        | 176 | PavB           | VF0524 | Adherence                                   |
| ORT-AF08-7        | 171 | PavB           | VF0524 | Adherence                                   |
| ORT-AF10-05-O-BH  | 188 | Capsule        | VF0144 | Immune modulation                           |
| ORT-AF10-05-O-BH  | 188 | PavB           | VF0524 | Adherence                                   |
| ORT-AF10-05-O-BH  | 188 | Neuraminidase  | VF0148 | Exoenzyme                                   |
| ORT-AF10-05-O-BH  | 188 | PfbA           | VF0525 | Adherence                                   |
| ORT-AF10-07-O-BH  | 189 | Capsule        | VF0144 | Immune modulation                           |
| ORT-AF10-07-O-BH  | 189 | Capsule        | VF0361 | Immune modulation                           |
| ORT-AF10-11-O-BH  | 15  | Polar flagella | VF0473 | Motility                                    |
| ORT-AF10-11-O-BH  | 15  | Capsule        | VF0079 | Immune modulation                           |
| ORT-AF10-11-O-BH  | 15  | MntABC         | VF0455 | Stress survival                             |
| ORT-AF10-11-O-BH  | 15  | HmbR           | VF0048 | Nutritional/Metabolic factor                |
| ORT-AF10-11-O-BH  | 15  | MtrCDE         | VF0451 | ntimicrobial activity/Competitive advantage |
| ORT-AF10-11-O-BH  | 15  | Type IV pili   | VF0075 | Adherence                                   |
| ORT-AF10-14-O-BH  | 35  | Capsule        | VF0144 | Immune modulation                           |
| ORT-AF10-14-O-BH  | 35  | Neuraminidase  | VF0148 | Exoenzyme                                   |
| ORT-AF10-14-O-BH  | 35  | PfbA           | VF0525 | Adherence                                   |
| ORT-AF10-15-O-BH  | 159 | Neuraminidase  | VF0148 | Exoenzyme                                   |
| ORT-AF10-20-O-BH  | 63  | PavB           | VF0524 | Adherence                                   |

Supplementary Table 4a. *Streptococcus* genomes with complete pathway of quorum sensing

| Strain            | Sampling | Completeness of each pathway |                 |                 |
|-------------------|----------|------------------------------|-----------------|-----------------|
|                   |          | Streptococcus-1              | Streptococcus-2 | Streptococcus-3 |
| ODP-AM09-2-O-104  | ODP      | 1                            | 1               | 0.8             |
| ODP-AM09-9-O-BH   | ODP      | 1                            | 1               | 0.8             |
| ORS-AM09-22-104   | ORS      | 1                            | 1               | 0.8             |
| ORS-TM06-36       | ORS      | 1                            | 1               | 0.8             |
| ODP-AM09-12-104   | ODP      | 1                            | 1               | 0.8             |
| ORS-AM05-491      | ORS      | 1                            | 0.8333333333    | 0.8             |
| ORS-AM09-4-O-104  | ORS      | 1                            | 1               | 0.8             |
| ORT-AM05-511      | ORT      | 0.8                          | 0.3333333333    | 1               |
| ORT-AF08-32-MRS   | ORT      | 0.8                          | 0.3333333333    | 1               |
| ORS-AF08-4-MRS    | ORS      | 1                            | 1               | 0.8             |
| ORT-AM05-512      | ORT      | 0.8                          | 0.3333333333    | 1               |
| ODP-TM07-162      | ODP      | 1                            | 0.8333333333    | 0.8             |
| ODP-AF08-21-MRS   | ODP      | 1                            | 1               | 0.8             |
| ODP-AF06-108      | ODP      | 1                            | 0.8333333333    | 0.6             |
| ODP-AM09-3-O-104  | ODP      | 1                            | 1               | 0.8             |
| ODP-AF08-16-MRS   | ODP      | 0.8                          | 0.3333333333    | 1               |
| ORS-AF03-170      | ORS      | 1                            | 1               | 0.8             |
| ORT-AF10-07-O-BH  | ORT      | 1                            | 0.8333333333    | 0.8             |
| ODP-AM01-08       | ODP      | 1                            | 0.8333333333    | 0.8             |
| ODP-AF08-42-MRS   | ODP      | 1                            | 1               | 0.8             |
| ORT-AF10-C1       | ORT      | 1                            | 1               | 0.8             |
| ORS-AF08-8-MRS    | ORS      | 1                            | 1               | 0.8             |
| ODP-TM07-209      | ODP      | 1                            | 0.8333333333    | 0.6             |
| ODP-AM09-20-O-104 | ODP      | 1                            | 1               | 0.8             |
| ODP-AF08-23-MRS   | ODP      | 1                            | 1               | 0.8             |
| ODP-AF08-36-MRS   | ODP      | 1                            | 1               | 0.8             |
| ODP-AF08-38-MRS   | ODP      | 1                            | 1               | 0.8             |
| ORS-AM05-133      | ORS      | 1                            | 0.8333333333    | 0.6             |
| ODP-AM09-26-104   | ODP      | 1                            | 0.8333333333    | 0.8             |
| ORS-AM09-9-O-BH   | ORS      | 1                            | 1               | 0.8             |
| ODP-AM09-27-BH    | ODP      | 1                            | 1               | 0.8             |
| ORT-AF08-3        | ORT      | 0.4                          | 0               | 1               |
| ORT-AM09-24-O-104 | ORT      | 1                            | 1               | 0.8             |
| ORS-AF08-10       | ORS      | 1                            | 1               | 0.8             |
| ODP-AM05-262      | ODP      | 0.8                          | 0.3333333333    | 1               |
| ODP-AM09-9-104    | ODP      | 1                            | 1               | 0.8             |
| ORS-AF08-24       | ORS      | 1                            | 1               | 0.8             |
| ODP-AM05-395      | ODP      | 0.8                          | 0.3333333333    | 1               |
| ORS-AM05-197      | ORS      | 1                            | 1               | 0.8             |
| ODP-AM05-504      | ODP      | 1                            | 1               | 0.8             |
| ODP-AM09-20-104   | ODP      | 1                            | 1               | 0.8             |
| ODP-AM09-5-104    | ODP      | 1                            | 1               | 0.8             |
| ODP-AM05-19       | ODP      | 1                            | 1               | 0.8             |
| ODP-AF06-99       | ODP      | 1                            | 1               | 0.8             |
| ORS-AF05-11       | ORS      | 1                            | 1               | 0.8             |
| ODP-AF08-13-MRS   | ODP      | 0.8                          | 0.3333333333    | 1               |
| ODP-AM09-18-O-104 | ODP      | 1                            | 1               | 0.8             |
| ORS-AM09-19-O-BH  | ORS      | 1                            | 1               | 0.8             |
| ODP-AF04-83       | ODP      | 1                            | 1               | 0.8             |
| ORS-AF10-13-BH    | ORS      | 1                            | 1               | 0.8             |
| ODP-AF08-41-MRS   | ODP      | 1                            | 1               | 0.8             |
| ORS-AM09-8-104    | ORS      | 1                            | 1               | 0.8             |
| ODP-AM09-10-O-104 | ODP      | 1                            | 1               | 0.8             |
| ORS-AF10-10-BH    | ORS      | 1                            | 1               | 0.8             |
| ORT-AM08-195      | ORT      | 1                            | 0.8333333333    | 0.6             |
| ODP-AM09-45-O-BH  | ODP      | 1                            | 1               | 0.8             |
| ODP-AM05-457      | ODP      | 1                            | 1               | 0.8             |
| ODP-AM08-343      | ODP      | 0.8                          | 0.3333333333    | 1               |
| ODP-AM09-49-O-BH  | ODP      | 1                            | 0.8333333333    | 0.6             |
| ORS-AF10-C19      | ORS      | 1                            | 1               | 0.8             |
| ORS-AM09-45-O-BH  | ORS      | 1                            | 1               | 0.8             |
| ORT-AM09-22-O-104 | ORT      | 1                            | 1               | 0.8             |
| ORT-AM05-453      | ORT      | 0.8                          | 0.3333333333    | 1               |
| ORT-AF08-13       | ORT      | 1                            | 1               | 0.8             |
| ODP-AM09-1-BH     | ODP      | 1                            | 1               | 0.8             |
| ODP-AF10-C21      | ODP      | 1                            | 0.8333333333    | 0.6             |
| ODP-AM09-24-BH    | ODP      | 1                            | 1               | 0.8             |
| ORS-AM09-1-2-O-BH | ORS      | 1                            | 1               | 0.8             |
| ORS-AM09-1-104    | ORS      | 1                            | 1               | 0.8             |
| ODP-AF03-102      | ODP      | 1                            | 1               | 0.8             |
| ORS-AM09-40-O-BH  | ORS      | 1                            | 1               | 0.8             |
| ODP-AM09-3-104    | ODP      | 1                            | 1               | 0.8             |
| ORS-AM09-14-O-104 | ORS      | 1                            | 1               | 0.8             |
| ODP-AM09-20-O-BH  | ODP      | 1                            | 1               | 0.8             |
| ORS-AF08-12-MRS   | ORS      | 1                            | 1               | 0.8             |
| ORS-AM08-63       | ORS      | 1                            | 0.8333333333    | 0.8             |
| ORS-AF08-20       | ORS      | 1                            | 1               | 0.8             |
| ODP-AM09-17-104   | ODP      | 1                            | 0.8333333333    | 0.8             |
| ODP-AM09-36-O-BH  | ODP      | 1                            | 1               | 0.8             |
| ORS-AF05-07       | ORS      | 1                            | 1               | 0.8             |
| ORS-AF08-17-MRS   | ORS      | 1                            | 1               | 0.8             |
| ORS-AF10-C20      | ORS      | 1                            | 1               | 0.8             |
| ORT-AF08-28-MRS   | ORT      | 0.8                          | 0.3333333333    | 1               |
| ORT-AF08-21-O-MRS | ORT      | 1                            | 1               | 0.8             |
| ORS-AM09-13-O-104 | ORS      | 1                            | 1               | 0.8             |
| ODP-AM09-19-O-104 | ODP      | 1                            | 1               | 0.8             |
| ORS-AF10-C8       | ORS      | 1                            | 1               | 0.8             |
| ORT-AF10-C12      | ORT      | 1                            | 0.8333333333    | 0.8             |
| ORS-AM05-481      | ORS      | 1                            | 1               | 0.8             |
| ODP-AF08-8-MRS    | ODP      | 1                            | 1               | 0.8             |
| ORS-AF04-59       | ORS      | 1                            | 1               | 0.8             |
| ODP-AM09-6-O-104  | ODP      | 1                            | 1               | 0.8             |
| ORS-AF08-22       | ORS      | 1                            | 1               | 0.8             |
| ORT-AM09-3-O-104  | ORT      | 1                            | 1               | 0.8             |
| ODP-AM09-34-BH    | ODP      | 0.8                          | 0.3333333333    | 1               |
| ODP-AF10-C6       | ODP      | 0.8                          | 0.3333333333    | 1               |
| ORS-AF08-21       | ORS      | 1                            | 1               | 0.8             |
| ODP-AM09-3-BH     | ODP      | 1                            | 1               | 0.8             |
| ORS-AF10-9-BH     | ORS      | 1                            | 1               | 0.8             |
| ODP-AM09-6-104    | ODP      | 1                            | 1               | 0.8             |
| ODP-AM09-21-O-104 | ODP      | 1                            | 1               | 0.8             |
| ORS-AF10-22-BH    | ORS      | 1                            | 0.8333333333    | 0.8             |
| ORS-TM07-219      | ORS      | 1                            | 1               | 0.8             |
| ODP-AM09-46-O-BH  | ODP      | 1                            | 1               | 0.8             |
| ODP-AF08-40-MRS   | ODP      | 0.8                          | 0.3333333333    | 1               |
| ORS-AF08-13       | ORS      | 1                            | 1               | 0.8             |
| ORT-AF10-C11      | ORT      | 1                            | 0.8333333333    | 0.8             |

|                   |     |     |             |     |
|-------------------|-----|-----|-------------|-----|
| ODP-AM09-23-BH    | ODP | 1   | 0.833333333 | 0.8 |
| ORT-AM05-89       | ORT | 1   | 0.833333333 | 0.8 |
| ODP-AM09-16-O-104 | ODP | 1   | 1           | 0.8 |
| ODP-AM05-263      | ODP | 1   | 1           | 0.8 |
| ORS-AF10-C13      | ORS | 1   | 1           | 0.8 |
| ODP-AM09-13-104   | ODP | 1   | 1           | 0.8 |
| ORS-AM09-10-104   | ORS | 1   | 0.833333333 | 0.8 |
| ORT-AF08-43-MRS   | ORT | 1   | 1           | 0.8 |
| ORS-AF10-11-BH    | ORS | 1   | 1           | 0.8 |
| ORS-TM07-225      | ORS | 1   | 1           | 0.8 |
| ODP-AM09-38-O-BH  | ODP | 1   | 1           | 0.8 |
| ORT-AM05-05       | ORT | 1   | 0.833333333 | 0.6 |
| ODP-AM05-266      | ODP | 0.8 | 0.333333333 | 1   |
| ODP-AM09-39-O-BH  | ODP | 1   | 1           | 0.8 |
| ORS-AM09-9-O-104  | ORS | 1   | 1           | 0.8 |
| ODP-AF08-39-MRS   | ODP | 1   | 1           | 0.8 |
| ORS-AM09-10-O-BH  | ORS | 1   | 1           | 0.8 |
| ORS-AM09-8-O-BH   | ORS | 1   | 1           | 0.8 |
| ODP-AM05-458      | ODP | 1   | 1           | 0.8 |
| ODP-AM09-33-BH    | ODP | 1   | 1           | 0.8 |
| ODP-AM09-21-104   | ODP | 1   | 1           | 0.8 |
| ODP-AM09-22-BH    | ODP | 1   | 1           | 0.8 |
| ORT-AF10-05-O-BH  | ORT | 1   | 1           | 0.8 |
| ORS-AM09-11-O-104 | ORS | 1   | 1           | 0.8 |
| ORT-AF08-34-MRS   | ORT | 1   | 1           | 0.8 |
| ODP-AM09-47-O-BH  | ODP | 1   | 1           | 0.8 |
| ORS-AM09-17-O-BH  | ORS | 1   | 1           | 0.8 |
| ODP-AF08-10-MRS   | ODP | 1   | 1           | 0.8 |
| ODP-AM09-1-1-O-BH | ODP | 1   | 1           | 0.8 |
| ODP-AM09-15-104   | ODP | 1   | 1           | 0.8 |
| ODP-AM09-10-104   | ODP | 1   | 1           | 0.8 |
| ODP-AF08-35-MRS   | ODP | 1   | 1           | 0.8 |
| ODP-AM05-506      | ODP | 1   | 1           | 0.8 |
| ODP-AF08-2        | ODP | 1   | 1           | 0.8 |
| ODP-TM07-272      | ODP | 1   | 0.833333333 | 0.8 |
| ODP-AF04-88       | ODP | 1   | 1           | 0.8 |
| ODP-AM09-32-BH    | ODP | 1   | 1           | 0.8 |
| ORT-AM09-18-O-104 | ORT | 1   | 1           | 0.8 |
| ODP-AM09-9-O-104  | ODP | 1   | 1           | 0.8 |
| ODP-AF04-250      | ODP | 0.8 | 0.333333333 | 1   |
| ODP-AM09-23-104   | ODP | 1   | 1           | 0.8 |
| ODP-AM09-1-2-O-BH | ODP | 1   | 1           | 0.8 |
| ODP-AF08-20-MRS   | ODP | 0.8 | 0.333333333 | 1   |
| ODP-AF08-7-MRS    | ODP | 1   | 1           | 0.8 |
| ORS-AF10-7-BH     | ORS | 1   | 0.833333333 | 0.6 |
| ORT-AF08-11       | ORT | 1   | 1           | 0.8 |
| ORT-AM09-6-O-104  | ORT | 1   | 1           | 0.8 |
| ODP-AF10-C23      | ODP | 1   | 1           | 0.8 |
| ORS-AF10-20-O-BH  | ORS | 1   | 0.833333333 | 0.8 |
| ODP-AF04-94       | ODP | 1   | 1           | 0.8 |
| ORS-AF08-14       | ORS | 1   | 1           | 0.8 |
| ORT-AF03-04       | ORT | 0.8 | 0.333333333 | 1   |
| ORS-AM09-43-O-BH  | ORS | 1   | 0.666666667 | 0.4 |
| ORS-AM09-19-104   | ORS | 1   | 1           | 0.8 |
| ODP-AM09-12-O-BH  | ODP | 1   | 1           | 0.8 |
| ODP-AM09-27-104   | ODP | 1   | 1           | 0.8 |
| ODP-AM05-80       | ODP | 1   | 1           | 0.8 |
| ODP-AM09-16-O-BH  | ODP | 1   | 1           | 0.8 |
| ORS-AF10-8-BH     | ORS | 1   | 1           | 0.8 |
| ORS-AM09-27-O-104 | ORS | 1   | 1           | 0.8 |
| ORS-AM05-122      | ORS | 1   | 1           | 0.8 |
| ORS-AM09-16-104   | ORS | 1   | 1           | 0.8 |
| ORS-TM06-113      | ORS | 1   | 1           | 0.8 |
| ODP-AM09-23-O-104 | ODP | 1   | 1           | 0.8 |
| ORS-AM05-128      | ORS | 0.8 | 0.333333333 | 1   |
| ORS-AF10-5-BH     | ORS | 1   | 1           | 0.8 |
| ODP-AM09-12-O-104 | ODP | 0.8 | 0.333333333 | 1   |
| ORT-AM09-2-O-104  | ORT | 1   | 1           | 0.8 |
| ODP-AM09-42-O-BH  | ODP | 1   | 1           | 0.8 |
| ODP-AF08-3        | ODP | 0.8 | 0.333333333 | 1   |
| ORS-AF08-19       | ORS | 1   | 1           | 0.8 |
| ORS-AM05-177      | ORS | 0.8 | 0.333333333 | 1   |
| ORS-AF10-C12      | ORS | 1   | 1           | 0.8 |
| ORS-AF04-42       | ORS | 1   | 1           | 0.8 |
| ORS-AF04-54       | ORS | 1   | 1           | 0.8 |
| ODP-AM05-252      | ODP | 1   | 1           | 0.8 |
| ORT-AF10-14-O-BH  | ORT | 1   | 0.833333333 | 0.6 |
| ORS-AM09-2-O-104  | ORS | 1   | 1           | 0.8 |
| ORT-AM05-529      | ORT | 1   | 0.833333333 | 0.6 |
| ORT-AF08-16       | ORT | 1   | 1           | 0.8 |
| ORS-AM09-5-104    | ORS | 1   | 1           | 0.8 |
| ODP-AM09-22-O-104 | ODP | 1   | 1           | 0.8 |
| ORS-AF03-155      | ORS | 1   | 1           | 1   |
| ORS-AF08-17       | ORS | 1   | 1           | 0.8 |
| ORS-AF03-141      | ORS | 1   | 1           | 0.8 |
| ORS-AM09-16-BH    | ORS | 1   | 1           | 0.8 |
| ORS-AM09-9-104    | ORS | 1   | 1           | 0.8 |
| ODP-AM09-7-BH     | ODP | 1   | 1           | 0.8 |
| ODP-AM01-02BB     | ODP | 1   | 0.833333333 | 0.8 |
| ORS-AM05-495      | ORS | 0.8 | 0.333333333 | 1   |



Supplementary Table 4b. The data of crystal violet assay (normalized)

| Strain                          | Sampling | A1       | A2      | A3      | A4      | A5     | A6     | A7     | A8     | A9      | A10     | A11     | A12     |
|---------------------------------|----------|----------|---------|---------|---------|--------|--------|--------|--------|---------|---------|---------|---------|
| S. constellatus_ODP-AF08-16-MRS | ODP      | 0.02805  | 0.02805 | 0.02315 | 0.03295 | 0.03   | 0.0278 | 0.03   | 0.0365 | 0.04815 | 0.17375 | 0.05935 | 0.08825 |
| S. salivarius_ODP-AM09-2D5      | ODP      | 0.07165  | 0.05555 | 0.14275 | 0.09655 | 0.0411 | 0.0711 | 0.0307 | 0.0445 | 0.06065 | 0.08325 | 0.08485 | 0.05355 |
| S. salivarius_ORs-AF08-23-MRS   | ORS      | 0.14755  | 0.13835 | 0.10995 | 0.09735 | 0.0548 | 0.0796 | 0.0275 | 0.0294 | 0.05335 | 0.23385 | 0.27105 | 0.22535 |
| S. oralis_ORs-AF08-4-MRS        | ORS      | 0.01275  | 0.03285 | 0.03605 | 0.04785 | 0.0148 | 0.03   | 0.022  | 0.0074 | 0.01465 | 0.04705 | 0.05835 | 0.05205 |
| S. mitis_ORs-AM05-478           | ORS      | -0.00695 | 0.01335 | 0.00285 | 0.02285 | 0.0149 | 0.0349 | 0.0124 | 0.0201 | 0.01235 | 0.03095 | 0.00565 | 0.00905 |
| S. salivarius_ORt-AF10-26-O-BH  | ORT      | 0.05475  | 0.05685 | 0.08235 | 0.12985 | 0.0181 | 0.0303 | 0.0157 | 0.0566 | 0.06155 | 0.07175 | 0.07725 | 0.08015 |

**Supplementary Table 5. The degree of clusters in correlation network analysis**

| <b>Cluster Name</b>                       | <b>Cluster</b> | <b>degree</b> |
|-------------------------------------------|----------------|---------------|
| Streptococcus unknow_160                  | 160            | 98            |
| Streptococcus unknow_130                  | 130            | 95            |
| Streptococcus unknow_100                  | 100            | 94            |
| Streptococcus unknow_172                  | 172            | 94            |
| Streptococcus unknow_122                  | 122            | 94            |
| Streptococcus unknow_156                  | 156            | 93            |
| Streptococcus unknow_118                  | 118            | 88            |
| Streptococcus unknow_126                  | 126            | 86            |
| Streptococcus unknow_7                    | 7              | 85            |
| Streptococcus unknow_108                  | 108            | 83            |
| Streptococcus oralis_173                  | 173            | 83            |
| Streptococcus pseudopneumoniae/unknow_115 | 115            | 83            |
| Streptococcus unknow_162                  | 162            | 82            |
| Streptococcus unknow_102                  | 102            | 82            |
| Streptococcus sp015256435_111             | 111            | 82            |
| Streptococcus unknow_50                   | 50             | 82            |
| Streptococcus unknow_86                   | 86             | 81            |
| Streptococcus oralis_31                   | 31             | 80            |
| Granulicatella adiacens_23                | 23             | 78            |
| Streptococcus oralis_35                   | 35             | 78            |
| Streptococcus sp900550895_186             | 186            | 77            |
| Streptococcus sp002355895_112             | 112            | 76            |
| Streptococcus oralis_79                   | 79             | 76            |
| Streptococcus unknow_143                  | 143            | 75            |
| Streptococcus unknow_168                  | 168            | 74            |
| Streptococcus unknow_124                  | 124            | 74            |
| Streptococcus cristatus_52                | 52             | 73            |
| Streptococcus mitis_11                    | 11             | 72            |
| Streptococcus cristatus_36                | 36             | 72            |
| Streptococcus oralis_93                   | 93             | 72            |
| Granulicatella sp905371865_69             | 69             | 70            |
| Granulicatella adiacens/unknow_34         | 34             | 69            |
| Streptococcus sp902460355_139             | 139            | 69            |
| Streptococcus unknow_193                  | 193            | 69            |
| Streptococcus mitis/unknow_101            | 101            | 68            |
| Streptococcus unknow_174                  | 174            | 68            |
| Streptococcus unknow_116                  | 116            | 68            |
| Streptococcus symci_157                   | 157            | 68            |
| Streptococcus mitis/symci_89              | 89             | 68            |
| Streptococcus unknow_194                  | 194            | 67            |
| Streptococcus oralis/unknow_107           | 107            | 67            |
| Streptococcus xiaochunlingii_56           | 56             | 67            |
| Streptococcus unknow_189                  | 189            | 66            |
| Streptococcus gordonii_63                 | 63             | 66            |
| Streptococcus unknow_9                    | 9              | 66            |
| Streptococcus mitis/unknow_170            | 170            | 66            |
| Streptococcus mitis_85                    | 85             | 66            |
| Streptococcus unknow_161                  | 161            | 66            |
| Streptococcus oralis_163                  | 163            | 65            |
| Streptococcus unknow_8                    | 8              | 65            |
| Streptococcus unknow_72                   | 72             | 65            |
| Streptococcus sinensis_24                 | 24             | 64            |
| Streptococcus cristatus_83                | 83             | 63            |
| Streptococcus unknow_40                   | 40             | 63            |
| Streptococcus unknow_192                  | 192            | 62            |
| Streptococcus mitis_169                   | 169            | 62            |

|                                      |     |    |
|--------------------------------------|-----|----|
| Streptococcus pseudopneumoniae_119   | 119 | 62 |
| Streptococcus infantis_73            | 73  | 61 |
| Streptococcus mitis_188              | 188 | 60 |
| Streptococcus unknow_171             | 171 | 60 |
| Streptococcus intermedius_70         | 70  | 60 |
| Gemella unknow_84                    | 84  | 58 |
| Streptococcus unknow_110             | 110 | 58 |
| Streptococcus unknow_127             | 127 | 58 |
| Streptococcus sanguinis_113          | 113 | 58 |
| Gemella haemolysans_151              | 151 | 57 |
| Streptococcus mitis_182              | 182 | 57 |
| Granulicatella unknow_106            | 106 | 56 |
| Streptococcus unknow_154             | 154 | 56 |
| Gemella unknow_94                    | 94  | 55 |
| Granulicatella sp905371865_30        | 30  | 55 |
| Streptococcus unknow_135             | 135 | 55 |
| Streptococcus sp000187745_141        | 141 | 53 |
| Streptococcus unknow_158             | 158 | 53 |
| Streptococcus sanguinis_29           | 29  | 53 |
| Granulicatella unknow_18             | 18  | 52 |
| Granulicatella sp015264885_103       | 103 | 51 |
| Streptococcus unknow_176             | 176 | 51 |
| Streptococcus sanguinis_3            | 3   | 51 |
| Gemella unknow_181                   | 181 | 50 |
| Granulicatella sp001071995_195       | 195 | 50 |
| Streptococcus anginosus_104          | 104 | 50 |
| Streptococcus unknow_185             | 185 | 50 |
| Streptococcus unknow_98              | 98  | 50 |
| Streptococcus unknow_60              | 60  | 49 |
| Granulicatella unknow_95             | 95  | 48 |
| Streptococcus unknow_22              | 22  | 48 |
| Gemella haemolysans_49               | 49  | 47 |
| Streptococcus xiaochunlingii_5       | 5   | 47 |
| Streptococcus unknow_184             | 184 | 45 |
| Streptococcus koreensis/unknow_68    | 68  | 45 |
| Streptococcus infantis_159           | 159 | 44 |
| Streptococcus sp001813295_183        | 183 | 43 |
| Streptococcus unknow_120             | 120 | 42 |
| Streptococcus parasanguinis_53       | 53  | 42 |
| Granulicatella unknow_123            | 123 | 41 |
| Streptococcus parasanguinis_20       | 20  | 40 |
| Granulicatella unknow_57             | 57  | 38 |
| Streptococcus parasanguinis_71       | 71  | 38 |
| Streptococcus parasanguinis/unknow_6 | 6   | 37 |
| Pauljensia sp000411415_166           | 166 | 33 |
| Gemella morbillorum_65               | 65  | 32 |
| Rothia mucilaginosa/unknow_78        | 78  | 30 |
| Rothia mucilaginosa_59               | 59  | 30 |
| Veillonella unknow_19                | 19  | 30 |
| Streptococcus anginosus_61           | 61  | 30 |
| Rothia sp015265375_91                | 91  | 29 |
| Bulleidia sp015256775_82             | 82  | 29 |
| Granulicatella unknow_77             | 77  | 29 |
| Streptococcus koreensis_48           | 48  | 29 |
| Lancefieldella unknow_155            | 155 | 27 |
| Lancefieldella unknow_96             | 96  | 27 |
| Lancefieldella unknow_149            | 149 | 27 |
| Lancefieldella sp000564995_114       | 114 | 27 |

|                                                  |     |    |
|--------------------------------------------------|-----|----|
| Rothia unknow_109                                | 109 | 27 |
| Streptococcus timonensis/mitis_16                | 16  | 27 |
| Lancefieldella unknow_26                         | 26  | 26 |
| Lancefieldella unknow_2                          | 2   | 26 |
| Streptococcus rubneri_14                         | 14  | 26 |
| Pauljensenia sp001064145_42                      | 42  | 25 |
| Veillonella atypica_178                          | 178 | 24 |
| Veillonella unknow_179                           | 179 | 24 |
| Granulicatella unknow_25                         | 25  | 24 |
| Streptococcus unknow_74                          | 74  | 24 |
| Rothia aerea_32                                  | 32  | 22 |
| Pauljensenia sp001838165_147                     | 147 | 22 |
| Pauljensenia sp000185285_153                     | 153 | 22 |
| Rothia mucilaginoso_41                           | 41  | 21 |
| Pauljensenia sp018382595_97                      | 97  | 20 |
| Pauljensenia sp000466265_105                     | 105 | 19 |
| Pauljensenia sp902373545_45                      | 45  | 17 |
| Pauljensenia sp000278725_121                     | 121 | 17 |
| Prevotella histicola_28                          | 28  | 17 |
| Gemella sanguinis_17                             | 17  | 17 |
| Streptococcus constellatus_46                    | 46  | 17 |
| Streptococcus sp001556435_117                    | 117 | 17 |
| Pauljensenia odontolytica_38                     | 38  | 16 |
| Rothia dentocariosa_13                           | 13  | 15 |
| Streptococcus salivarius_4                       | 4   | 15 |
| Actinomyces naeslundii_33                        | 33  | 14 |
| Actinomyces johnsonii_66                         | 66  | 13 |
| Capnocytophaga sputigena_90                      | 90  | 13 |
| Pauljensenia unknow_144                          | 144 | 12 |
| Leptotrichia massiliensis_67                     | 67  | 12 |
| Pauljensenia sp018375675_76                      | 76  | 11 |
| Prevotella sp000257925_62                        | 62  | 11 |
| Prevotella melaninogenica_175                    | 175 | 11 |
| Lachnoanaerobaculum unknow_75                    | 75  | 11 |
| Pauljensenia unknow_167                          | 167 | 10 |
| Pauljensenia odontolytica_27                     | 27  | 10 |
| Actinomyces oris_58                              | 58  | 9  |
| Neisseria elongata_64                            | 64  | 9  |
| Actinomyces oris_39                              | 39  | 8  |
| Bulleidia unknow_47                              | 47  | 8  |
| Streptococcus vestibularis_131                   | 131 | 8  |
| Lachnoanaerobaculum gingivalis_88                | 88  | 8  |
| Corynebacterium accolens_125                     | 125 | 7  |
| Pauljensenia hongkongensis_132                   | 132 | 7  |
| Bacillus tropicus_191                            | 191 | 7  |
| Eubacterium infirmum_148                         | 148 | 7  |
| Lachnoanaerobaculum sp000296385_165              | 165 | 7  |
| Fusobacterium unknow_133                         | 133 | 7  |
| Fusobacterium polymorphum_87                     | 87  | 7  |
| Fusobacterium hwasookii_142                      | 142 | 7  |
| Fusobacterium pseudoperiodonticum/periodonticum_ | 80  | 7  |
| Priestia megaterium_140                          | 140 | 6  |
| Staphylococcus hominis_99                        | 99  | 6  |
| Capnocytophaga ochracea_190                      | 190 | 5  |
| Bacillus mobilis_164                             | 164 | 5  |
| Enterococcus faecalis_21                         | 21  | 5  |
| Enterococcus casseliflavus_1                     | 1   | 5  |
| Oribacterium unknow_10                           | 10  | 5  |

|                                   |     |   |
|-----------------------------------|-----|---|
| Neisseria sicca_44                | 44  | 5 |
| Fusobacterium animalis_146        | 146 | 5 |
| Corynebacterium argenteratense_54 | 54  | 4 |
| Prevotella loescheii_150          | 150 | 4 |
| Neisseria sicca_187               | 187 | 4 |
| Leptotrichia wadei_152            | 152 | 4 |
| Catonella unknow_134              | 134 | 4 |
| Microbacterium algeriense_12      | 12  | 3 |
| Capnocytophaga leadbetteri_81     | 81  | 3 |
| Neisseria cerebrosa/sicca_136     | 136 | 3 |
| Veillonella sp900757715_177       | 177 | 2 |
| Veillonella parvula_92            | 92  | 2 |
| Lancefieldella rimae_128          | 128 | 2 |
| Peptoanaerobacter unknow_138      | 138 | 2 |
| Neisseria subflava/flavescens_15  | 15  | 2 |
| Bacillus paralicheniformis_145    | 145 | 1 |
| Bacillus luti_137                 | 137 | 1 |
| Abiotrophia defectiva_37          | 37  | 1 |
| Abiotrophia sp001815865_55        | 55  | 1 |

**Supplementary Table 6. Culture media used for isolation of the oral bacteria**

Noted: Since aerobic and anaerobic bacteria both exist in the oral cavity, we used both aerobic and anaerobic culture conditions.

1. For all the anaerobic culture conditions, we additionally supplemented 0.50 g/L Cysteine-HCl x H<sub>2</sub>O, 0.25 g/L Na<sub>2</sub>S, and 1 mg/L resazurin in each medium formulation listed below.

2. For the blood-media, we additionally supplemented 2.5% sterile defibrinated sheep blood in the corresponding sterilized media.

3. As for the blood-enriched BHI medium, we firstly inoculated the samples to 5 mL of the sterile sheep blood for 2-3 days, and used blood-BHI medium for bacteria isolation.

| Medium 1. BHI medium       |          |
|----------------------------|----------|
| Component                  | Amount/L |
| Brain infusion solids      | 12.5 g   |
| Beef heart infusion solids | 5.0 g    |
| Proteose peptone           | 10 g     |
| Glucose                    | 2.0 g    |
| Sodium chloride            | 5.0 g    |
| Disodium phosphate         | 2.5 g    |
| Agar                       | 15.0 g   |
| pH                         | 7.4      |

| Medium 2. Columbia medium   |           |
|-----------------------------|-----------|
| Component                   | Amount/L  |
| Casein Tryptone             | 10.0 g    |
| Pepsin Hydrolytes           | 5.0 g     |
| Heart Pancreatin Hydrolytes | 3.0 g     |
| Yeast Extract               | 5.0 g     |
| Corn starch                 | 1.0 g     |
| NaCl                        | 5.0 g     |
| Noble Agar                  | 15.0 g    |
| pH                          | 7.3 ± 0.2 |

| Medium 3. H medium |          |
|--------------------|----------|
| Component          | Amount/L |
| Tryptone           | 10.0 g   |
| Sodium Chloride    | 8.0 g    |
| Agar               | 15.0 g   |
| pH                 | 7.0      |

| Medium 4. J medium  |           |
|---------------------|-----------|
| Component           | Amount/L  |
| Beef Dip Powder     | 10.0 g    |
| Peptone             | 10.0 g    |
| Lactose             | 10.0 g    |
| Sodium citrate      | 20.0 g    |
| Ferric citrate      | 1.0 g     |
| Sodium deoxycholate | 5.0 g     |
| Agar                | 15.0 g    |
| Neutral red         | 0.02 g    |
| pH                  | 7.3 ± 0.2 |

| Medium 5. TSB medium  |           |
|-----------------------|-----------|
| Component             | Amount/L  |
| Tryptone              | 17.0 g    |
| Soytone               | 3.0 g     |
| Glucose               | 2.5 g     |
| Sodium Chloride       | 5.0 g     |
| Dipotassium Phosphate | 2.5 g     |
| Agar                  | 15.0 g    |
| pH                    | 7.3 ± 0.2 |

| Medium 6. Spore medium |          |
|------------------------|----------|
| Component              | Amount/L |
| Yeast Extract          | 1.0 g    |
| Beef extract           | 1.0 g    |
| Tryptone Peptone       | 2.0 g    |
| Glucose                | 10.0 g   |
| FeSO <sub>4</sub>      | 0.001 g  |
| Agar                   | 15.0 g   |
| pH                     | 7.2      |

| Medium 7. SCH medium          |          |
|-------------------------------|----------|
| Component                     | Amount/L |
| Tryptone Peptone              | 8.2 g    |
| Peptone                       | 2.5 g    |
| Peptone from soya             | 1.0 g    |
| Glucose                       | 5.8 g    |
| Yeast extract                 | 5.0 g    |
| NaCl                          | 1.7 g    |
| NaHCO <sub>3</sub>            | 0.8 g    |
| Cysteine-HCl-H <sub>2</sub> O | 0.4 g    |
| Haemin                        | 0.01 g   |
| Tris                          | 15.0 g   |
| Agar                          | 15.0 g   |
| pH                            | 7.2      |

| Medium 8. MRS medium |          |
|----------------------|----------|
| Component            | Amount/L |
| Peptone              | 10.0 g   |
| Yeast extract        | 5.0 g    |
| Meat extract         | 10.0 g   |
| Glucose              | 20.0 g   |
| Polysorbate 80       | 1.0 g    |
| Sodium acetate       | 5.0 g    |
| Magnesium sulfate    | 0.1 g    |
| Manganese sulfate    | 0.05 g   |
| Disodium phosphate   | 2.0 g    |
| Agar                 | 15.0 g   |
| pH                   | 6.2      |

| Medium 9. MPYG medium                                                                                        |          |
|--------------------------------------------------------------------------------------------------------------|----------|
| Component                                                                                                    | Amount/L |
| Trypticase peptone                                                                                           | 5.00 g   |
| Peptone                                                                                                      | 3.00 g   |
| Peptone from soya                                                                                            | 2.00 g   |
| Polypeptone                                                                                                  | 1.00 g   |
| Yeast extract                                                                                                | 10.00 g  |
| Beef extract                                                                                                 | 5.00 g   |
| Glucose                                                                                                      | 5.00 g   |
| Tween 80                                                                                                     | 0.50 mL  |
| Maltose                                                                                                      | 0.50 g   |
| Cellobiose                                                                                                   | 0.50 g   |
| Starch, soluble                                                                                              | 0.50 g   |
| Glycerol                                                                                                     | 0.50 mL  |
| K <sub>2</sub> HPO <sub>4</sub>                                                                              | 2.00 g   |
| Salt solution (see below)                                                                                    | 40.00 mL |
| Trace element(see below)                                                                                     | 10.00 mL |
| Vitamin solution(see below)                                                                                  | 10.00 mL |
| Haemin solution (see below)                                                                                  | 10.00 mL |
| Vitamin K1 solution (see below)                                                                              | 0.20 mL  |
| Agar                                                                                                         | 15 g     |
| <b>Salt solution(DSMZ Salt solution):</b>                                                                    |          |
| CaCl <sub>2</sub> x 2 H <sub>2</sub> O                                                                       | 0.25 g   |
| MgSO <sub>4</sub> x 7 H <sub>2</sub> O                                                                       | 0.50 g   |
| K <sub>2</sub> HPO <sub>4</sub>                                                                              | 1.00 g   |
| KH <sub>2</sub> PO <sub>4</sub>                                                                              | 1.00 g   |
| NaHCO <sub>3</sub>                                                                                           | 10.00 g  |
| NaCl                                                                                                         | 2.00 g   |
| <b>Trace element solution(DSMZ Trace element solution):</b>                                                  |          |
| Nitilotriacetic acid                                                                                         | 1.50 g   |
| MgSO <sub>4</sub> x 7 H <sub>2</sub> O                                                                       | 3.00 g   |
| MnSO <sub>4</sub> x H <sub>2</sub> O                                                                         | 0.50 g   |
| NaCl                                                                                                         | 1.00 g   |
| FeSO <sub>4</sub> x 7 H <sub>2</sub> O                                                                       | 0.10 g   |
| CoSO <sub>4</sub> x 7 H <sub>2</sub> O                                                                       | 0.18 g   |
| CaCl <sub>2</sub> x 2 H <sub>2</sub> O                                                                       | 0.10 g   |
| ZnSO <sub>4</sub> x 7 H <sub>2</sub> O                                                                       | 0.18 g   |
| CuSO <sub>4</sub> x 5 H <sub>2</sub> O                                                                       | 0.01 g   |
| KAl(SO <sub>4</sub> ) <sub>2</sub> x 12 H <sub>2</sub> O                                                     | 0.02 g   |
| H <sub>3</sub> BO <sub>3</sub>                                                                               | 0.01 g   |
| Na <sub>2</sub> MoO <sub>4</sub> x 2 H <sub>2</sub> O                                                        | 0.01 g   |
| NiCl <sub>2</sub> x 6 H <sub>2</sub> O                                                                       | 0.03 g   |
| Na <sub>2</sub> SeO <sub>3</sub> x 5 H <sub>2</sub> O                                                        | 0.30 mg  |
| <b>Vitamin solution:</b>                                                                                     |          |
| Biotin                                                                                                       | 2.00 mg  |
| Folic acid                                                                                                   | 2.00 mg  |
| Pyridoxine-HCl                                                                                               | 10.00 mg |
| Thiamine-HCl x 2 H <sub>2</sub> O                                                                            | 5.00 mg  |
| Riboflavin                                                                                                   | 5.00 mg  |
| Nicotinic acid                                                                                               | 5.00 mg  |
| D-Ca-pantothenate                                                                                            | 5.00 mg  |
| Vitamin B12                                                                                                  | 0.10 mg  |
| p-Aminobenzoic acid                                                                                          | 5.00 mg  |
| Lipoic acid                                                                                                  | 5.00 mg  |
| Reference: <a href="https://doi.org/10.1038/s41587-018-0008-8">https://doi.org/10.1038/s41587-018-0008-8</a> |          |
